# Supplementary material for: Phosphoproteomic Analysis of the Highly-Metastatic Hepatocellular Carcinoma Cell Line, MHCC97-H
Source: MDPI journal article supplement (doi:10.3390/ijms16024209), 2015-02-16
Supplement: s1 [file s1]

## Sheet: Table S1-1st IMAC
Table S1. Identification of the unique phosphopeptide sequence in different IMAC steps. Modified_Sequence of 1st IMAC.
_IQPT(ph)S(ph)VGPT(ph)LAGT(ph)QK_
_VSVSPGRT(ph)S(ph)VT(ph)K_
_HISQIS(ph)VAEDLFT(ph)SVSEDLT(ph)_
_ALPPPSPSLS(ph)CS(ph)LT(ph)SYHR_
_MLAQSALSPYLSS(ph)PVS(ph)S(ph)YQR_
_PQLELAES(ph)S(ph)PAASFLS(ph)SR_
_QS(ph)T(ph)M(ox)VNS(ph)SNYLDR_
_S(ph)CFLEDAT(ph)IGNS(ph)NK_
_T(ph)SS(ph)FALNLPT(ph)LPEVK_
_AQT(ph)VT(ph)DS(ph)MFAVASK_
_EGIT(ph)AIGGTSTSHQTGES(ph)S(ph)IT_
_IYS(ph)FGLGGNGQLGTGS(ph)T(ph)SNR_
_T(ph)S(ph)LS(ph)DLNDPIILSSDDDDDNDRTNR_
_GEIKDSS(ph)PSSS(ph)PS(ph)PK_
_KGTT(ph)PPRS(ph)PEAS(ph)PK_
_PSSPS(ph)LS(ph)PLMGFGS(ph)NK_
_S(ph)KS(ph)PPKS(ph)PEEEGAVSS_
_TSS(ph)KESS(ph)PIPS(ph)PTSDR_
_TSS(ph)KESS(ph)PIPS(ph)PTSDRK_
_TVT(ph)PASS(ph)AKTS(ph)PAK_
_ASS(ph)HS(ph)SQTQGGGSVTK_
_ASS(ph)HSS(ph)QTQGGGSVTK_
_KPS(ph)PQPSS(ph)PR_
_KRS(ph)PSPS(ph)PTPEAK_
_PQNILVTIQGS(ph)S(ph)T_
_SSVQGASS(ph)REGS(ph)PAR_
_SYS(ph)PDGKES(ph)PSDKK_
_AMMT(ph)M(ox)AVLS(ph)K_
_HGT(ph)PDPS(ph)PR_
_HRPS(ph)PPAT(ph)PPPK_
_SVST(ph)ASS(ph)AIK_
_TKPTQAAGPS(ph)SPQKPPT(ph)PEETK_
_NDSDPTY(ph)GQQGHPNT(ph)WK_
_PY(ph)T(ph)NAQIQIK_
_EY(ph)LS(ph)ALNPSDLLR_
_FLET(ph)VELQIS(ph)LK_
_GFVDDIIQPS(ph)S(ph)TR_
_KRS(ph)PS(ph)PSPTPEAK_
_LAST(ph)IS(ph)IDPK_
_LSGEHS(ph)ESS(ph)TPRPR_
_RS(ph)PTSS(ph)PTPQR_
_RVS(ph)HS(ph)PPPK_
_T(ph)QLLPT(ph)SK_
_TVT(ph)LT(ph)SK_
_VQNYT(ph)VNILGET(ph)K_
_Y(ph)ESVELT(ph)QQLLR_
_ADS(ph)HGS(ph)GSQK_
_AKTQT(ph)PPVS(ph)PAPQPTEER_
_DMIT(ph)EAS(ph)QTPK_
_EALS(ph)QEVM(ox)S(ph)VIAQVK_
_ES(ph)WVEAT(ph)PR_
_FNGGHS(ph)PTHS(ph)PEK_
_GHTDTEGRPPS(ph)PPPT(ph)STPEK_
_GPPS(ph)PPAPVMHS(ph)PSR_
_GPPS(ph)PPAPVM(ox)HS(ph)PSR_
_LPCIYLVDS(ph)GGAY(ph)LPR_
_NTNS(ph)S(ph)LPIPK_
_PELPQDGTS(ph)T(ph)LR_
_QES(ph)CSPHHPQVLAQQGSGSS(ph)PK_
_SPGS(ph)TPTT(ph)PTSSQAPQK_
_S(ph)SSVGSSSSYPIS(ph)PAVSR_
_S(ph)TLGASTT(ph)SSVK_
_SVS(ph)TASS(ph)AIK_
_T(ph)CLISY(ph)WVTLR_
_TQT(ph)PPVS(ph)PAPQPTEER_
_VY(ph)YLS(ph)WLR_
_LGTDLMT(ph)S(ph)VPVK_
_LRLS(ph)PSPTS(ph)QR_
_S(ph)ELTQDPAVS(ph)VALGQTVR_
_STPS(ph)HGSVSSLNSTGSLS(ph)PK_
_STT(ph)PDIT(ph)GYR_
_TCS(ph)QPLHELHGGFT(ph)LK_
_YSNYILS(ph)SLS(ph)PSEVLR_
_Y(ph)SPSQNS(ph)PIHHIPSR_
_ELEKPIQSKPQS(ph)PVIQAAAVS(ph)PK_
_GDVTIT(ph)NDGAT(ph)ILK_
_GLDPVSELES(ph)S(ph)K_
_HGGS(ph)PQPLATTPLSQEPVNPPSEAS(ph)PTR_
_ISEGLPT(ph)PTKMT(ph)PR_
_LRLS(ph)PS(ph)PTSQR_
_NFSINSVASTY(ph)S(ph)EFAK_
_QGSITS(ph)PQANEQSVT(ph)PQR_
_RFT(ph)PPS(ph)TALSPGK_
_SCLIHT(ph)S(ph)EK_
_T(ph)LDLPIY(ph)VTR_
_T(ph)QTPPVS(ph)PAPQPTEER_
_TVTPASS(ph)AKTS(ph)PAK_
_EIEIS(ph)NLS(ph)STIK_
_KAS(ph)VVDPSTESSPAPQEGSEQPASPAS(ph)PLSSR_
_LLLSPNNY(ph)T(ph)K_
_NAAS(ph)EILS(ph)TAFSSQPSRK_
_PDCPFT(ph)HVS(ph)R_
_QALVGQPASLT(ph)VTT(ph)K_
_S(ph)LQVPS(ph)IYYHLPHLLK_
_SPGST(ph)PTT(ph)PTSSQAPQK_
_T(ph)CSVWS(ph)LLR_
_T(ph)HTY(ph)YQADILAR_
_TSS(ph)T(ph)EGNFTK_
_Y(ph)LEDNS(ph)DLFSEQQ_
_AGMSSNQSIS(ph)SPVLDAVPRT(ph)PSR_
_ITLAT(ph)GEGLY(ph)QSINPK_
_QQVLVTEES(ph)FDS(ph)K_
_S(ph)PGSTPTTPT(ph)SSQAPQK_
_ALLAS(ph)QLEPT(ph)FAR_
_NGIY(ph)NITVLAS(ph)DQGGR_
_PGLY(ph)LELT(ph)R_
_QNVLLS(ph)ATLT(ph)EGVTR_
_S(ph)HLAMELLWLQQAINS(ph)R_
_CT(ph)QILES(ph)IHSK_
_HGGS(ph)PQPLATTPLSQEPVNPPS(ph)EASPTR_
_KPIS(ph)S(ph)IHAR_
_VPLYLNT(ph)S(ph)LK_
_Y(ph)LDVHS(ph)ELQHEK_
_LDQPVS(ph)APPS(ph)PR_
_EET(ph)LVIPST(ph)GIK_
_ESVVQCLHILS(ph)S(ph)LR_
_LES(ph)T(ph)VEIYR_
_LGQLETNMETLY(ph)T(ph)R_
_L(ph)LL(ph)DSYVK_
_MLLS(ph)S(ph)NIPK_
_ST(ph)VLECIAPT(ph)PVGER_
_T(ph)PSS(ph)SSR_
_YS(ph)VGIHNLLAY(ph)VK_
_ENHIET(ph)LT(ph)ER_
_LLY(ph)S(ph)IGANVSAEK_
_MDMS(ph)VLEISGIIMS(ph)R_
_SVAFT(ph)T(ph)LR_
_AAESET(ph)PGKS(ph)PEK_
_AAS(ph)PS(ph)PQSVR_
_AAVLS(ph)DS(ph)EDEEK_
_AAVLS(ph)DS(ph)EDEEKASAK_
_AEDGATPS(ph)PSNET(ph)PKK_
_AEDS(ph)DS(ph)EPEPEDNVR_
_AES(ph)PESSAIESTQST(ph)PQK_
_AESPES(ph)SAIESTQST(ph)PQK_
_AKS(ph)PT(ph)PDGSER_
_AQAVS(ph)EEEEEEEGKSS(ph)SPK_
_ARHDS(ph)PDPS(ph)PPR_
_ASS(ph)LSESS(ph)PPK_
_DIGS(ph)ES(ph)TEDQAM(ox)EDIK_
_DM(ox)YDKEY(ph)Y(ph)SVHNK_
_DM(ox)YDKEY(ph)YS(ph)VHNK_
_DMYDKEY(ph)Y(ph)SVHNK_
_DMYDKEY(ph)YS(ph)VHNK_
_DPGSLLAYNT(ph)T(ph)SHTDQSSR_
_DQS(ph)LS(ph)PSKGENK_
_EAARS(ph)PDKPGGS(ph)PSASR_
_EAEDS(ph)DS(ph)DDNIKR_
_EEPLS(ph)EEEPCTSTAIAS(ph)PEK_
_EEPVS(ph)S(ph)GPEEAVGK_
_EES(ph)EES(ph)EAEPVQR_
_EIIDAS(ph)DKEGM(ox)S(ph)PAK_
_EKQS(ph)S(ph)EEEEKETR_
_EKTDDT(ph)S(ph)GEDNDEKEAVASK_
_EKT(ph)PAT(ph)TPEAR_
_ELPNS(ph)HS(ph)M(ox)ICPK_
_ENPPVEDS(ph)S(ph)DEDDKR_
_EQLS(ph)TS(ph)EENSKK_
_EQS(ph)TPPKS(ph)PQ_
_ESEEGNPVRGS(ph)EEDS(ph)PKK_
_ES(ph)FLNNY(ph)SVEYVY_
_ESS(ph)PIPS(ph)PTSDR_
_ETES(ph)APGS(ph)PR_
_FPLHS(ph)ESS(ph)SK_
_GEIKDSS(ph)PSSSPS(ph)PK_
_GRSECDS(ph)S(ph)PEPK_
_GSETGS(ph)ET(ph)HESDLAPSDK_
_GSET(ph)PGAT(ph)PGSK_
_HDS(ph)DT(ph)SPPR_
_HDS(ph)PDPS(ph)PPR_
_HDT(ph)PDPS(ph)PLR_
_HDT(ph)PDPS(ph)PR_
_HDT(ph)PDPS(ph)PRR_
_HGS(ph)FHEDEDPIGS(ph)PR_
_HGS(ph)SDIS(ph)SPR_
_HKSDS(ph)PES(ph)DAEREK_
_HQAS(ph)DS(ph)ENEEPPKPR_
_HSS(ph)PHQS(ph)EDEEDPR_
_IDASKNEEDEGHS(ph)NSS(ph)PR_
_IDENS(ph)DKEMEVEES(ph)PEK_
_IDENS(ph)DKEMEVEES(ph)PEKIK_
_IEDVGS(ph)DEEDDS(ph)GKDKK_
_IENHNDES(ph)VT(ph)EK_
_IS(ph)DS(ph)ESEDPPR_
_KAEDS(ph)DS(ph)EPEPEDNVR_
_KAQAVS(ph)EEEEEEEGKSSS(ph)PK_
_KDSNELS(ph)DS(ph)AGEEDSADLKR_
_KET(ph)ES(ph)EAEDNLDDLEK_
_KLEKEEEEGISQES(ph)S(ph)EEEQ_
_KLS(ph)SS(ph)SEPYEEDEFNDDQSIKK_
_KLT(ph)S(ph)DEEGEPSGK_
_KNS(ph)STDQGS(ph)DEEGSLQK_
_KQS(ph)FDDNDS(ph)EELEDKDSK_
_KRS(ph)VAVS(ph)DEEEVEEEAER_
_KSDGACDS(ph)PS(ph)SDKENSSQIAQDHQK_
_KVELS(ph)ES(ph)EEDKGGK_
_LEDT(ph)WAY(ph)CQDTRK_
_LS(ph)EGS(ph)QPAEEEEDQETPSR_
_NAEEES(ph)ES(ph)EAEEGD_
_NEEDEGHS(ph)NSS(ph)PR_
_NLS(ph)S(ph)TTDDEAPR_
_NPEPDS(ph)DEHT(ph)PVEDEEPKK_
_NSATCHS(ph)EDS(ph)DLEID_
_NSQEDS(ph)EDS(ph)EDKDVK_
_NVS(ph)ES(ph)PNRK_
_NVS(ph)TGS(ph)AENEEK_
_QDFFPPVVGHS(ph)NS(ph)SPR_
_QEAGDS(ph)PPPAPGT(ph)PK_
_QEEIDES(ph)DDDLDDKPS(ph)PIKK_
_QGTM(ox)IDNS(ph)QAVDEMT(ph)R_
_QLY(ph)ET(ph)TDTTTR_
_RDS(ph)SES(ph)QLASTESDKPTTGR_
_REEGPPPPS(ph)PDGAS(ph)SDAEPEPPSGR_
_RES(ph)RQES(ph)DPEDDDVK_
_RKGS(ph)GS(ph)EQEGEDEEGGER_
_RKS(ph)LS(ph)DSESDDSK_
_RPES(ph)APAES(ph)SPSK_
_RPPT(ph)PCS(ph)DPER_
_RREEGPPPPS(ph)PDGAS(ph)SDAEPEPPSGR_
_RRPES(ph)APAESSPS(ph)K_
_RRS(ph)QSIEQES(ph)QEK_
_RRS(ph)QS(ph)IEQESQEK_
_RVES(ph)EES(ph)GDEEGK_
_RVES(ph)EES(ph)GDEEGKK_
_S(ph)ADVS(ph)PTTEGVK_
_SASS(ph)DTSEELNSQDS(ph)PPK_
_SGDET(ph)PGS(ph)EVPGDK_
_S(ph)KGHYEVTGS(ph)DDETGK_
_S(ph)LDEADSENKEEVS(ph)PLGSK_
_SPS(ph)AS(ph)ITDEDSNV_
_S(ph)PS(ph)PSPTPEAK_
_SQSS(ph)DTEQQS(ph)PTSGGGK_
_SQS(ph)S(ph)DTEQQSPTSGGGK_
_SRLT(ph)PVS(ph)PESSSTEEK_
_SRPTS(ph)EGS(ph)DIESTEPQK_
_SRS(ph)WEDS(ph)PER_
_SRT(ph)GSES(ph)SQTGTSTTSSR_
_SS(ph)DGS(ph)LSHEEDLAK_
_SSS(ph)ISEEKGDS(ph)DDEKPR_
_SSS(ph)NDSVDEETAES(ph)DTSPVLEK_
_SST(ph)PRES(ph)PCGK_
_S(ph)VAVS(ph)DEEEVEEEAER_
_S(ph)VQEGENPDDGVRGS(ph)PPEDYR_
_S(ph)VSEINS(ph)DDELSGK_
_SYS(ph)PDGKES(ph)PSDK_
_SYS(ph)PDGKESPS(ph)DKK_
_TASET(ph)RS(ph)EGSEYEEIPK_
_TDALT(ph)S(ph)SPGR_
_T(ph)DDTS(ph)GEDNDEKEAVASK_
_TDESS(ph)PVLS(ph)PR_
_TEARS(ph)SDEENGPPS(ph)SPDLDR_
_TGS(ph)ESS(ph)QTGTSTTSSR_
_TIAS(ph)DS(ph)EEEAGK_
_TIAS(ph)DS(ph)EEEAGKELSDK_
_TIAS(ph)DS(ph)EEEAGKELSDKK_
_T(ph)NLVWDEVS(ph)GQWR_
_T(ph)PS(ph)PPPR_
_VAGEAAET(ph)DS(ph)EPEPEPEPTAAPR_
_VAS(ph)ETHS(ph)EGSEYEELPK_
_VDEDS(ph)AEDTQS(ph)NDGKEVVEVGQK_
_VLGS(ph)EGEEEDEALS(ph)PAK_
_VPS(ph)S(ph)DEEVVEEPQSR_
_VVS(ph)S(ph)TSEEEEAFTEK_
_AADKS(ph)PESQNLIDGTK_
_AAESETPGKS(ph)PEK_
_AAGISLIVPGKS(ph)PTR_
_AAPEAS(ph)SPPASPLQHLLPGK_
_AAS(ph)LTEDRDR_
_AAS(ph)PPSYTLDLGESQLAPPPSK_
_AASLGSSQSS(ph)R_
_ADTSQEICS(ph)PR_
_AEAPLPS(ph)PK_
_AEDGATPS(ph)PSNETPK_
_AEDGATPS(ph)PSNETPKK_
_AEDGATPSPS(ph)NETPK_
_AEDGATPSPS(ph)NETPKK_
_AEDMYS(ph)AQSHQAATPPKDGK_
_AEGLEEADTGASGCHSHPEEQPTS(ph)ISPSR_
_AGGSAALS(ph)PSKK_
_AGLGS(ph)PERPPK_
_AGS(ph)FTGTSDPEAAPAR_
_AGS(ph)LQLSSMSAGNSSLR_
_AGSSAAGASGWTSAGSLNSVPTNSAQQGHNSPDS(ph)PVTSAAK_
_AHS(ph)PASLSFASYR_
_AHSENEGTALPSADS(ph)CTSPTK_
_AIGNNSATS(ph)PR_
_AKGPSES(ph)SKER_
_AKPPS(ph)SSSTCTDSATR_
_ANS(ph)PEKPPEAGAAHKPR_
_APQPTS(ph)PPASR_
_APS(ph)PTSSAGEEGTK_
_APSHMS(ph)SSHSFPQLAR_
_AQS(ph)SPASATFPVSVQEPPTKPR_
_AQSLVISPPAPS(ph)PR_
_ARS(ph)PSVAAMASPQLCR_
_ARS(ph)PTDDKVK_
_AS(ph)PPPQGPLPGPPGALHR_
_ASDSSS(ph)PSCSSGPR_
_ASEDTTSGS(ph)PPK_
_ASEDTTSGS(ph)PPKK_
_ASIGQS(ph)PGLPSTTFK_
_ASLGSLEGEAEAEASS(ph)PK_
_ASPEPQRENAS(ph)PAPGTTAEEAMSR_
_ASPVTSPAAAFPTAS(ph)PANK_
_ASVSQTSPQSASS(ph)PR_
_ATDSDLSS(ph)PR_
_ATS(ph)FEESER_
_ATS(ph)PESTSR_
_ATSSHPNSTS(ph)LK_
_ATSSSSGS(ph)LSATGR_
_AVPS(ph)PTTGEEGSVHSR_
_CS(ph)SPVDTECSHAEGSR_
_DAS(ph)PSKEER_
_DGKFS(ph)PIQEK_
_DGKNS(ph)QVFR_
_DGQDAIAQS(ph)PEKESK_
_DHNIPQES(ph)PKPVK_
_DKAPVQPQQS(ph)PAAAPGGTDEKPSGK_
_DKAS(ph)PEPEKDFSEK_
_DKEVS(ph)DDEAEEK_
_DKGQS(ph)FNDK_
_DKS(ph)PVREPIDNLTPEER_
_DLDRPESQS(ph)PK_
_DPAQPMS(ph)PGEATQSGAR_
_DQYVS(ph)TAPPR_
_DRDAS(ph)PSKEER_
_DSS(ph)SLSPK_
_DTSATSQS(ph)VNGSPQAEQPSLESTSK_
_DYDDMS(ph)PR_
_EANLQQNEEKNHSDSSTSESEVSSVS(ph)PLK_
_EAS(ph)PSTLNDK_
_EEDEEPES(ph)PPEKK_
_EELSHS(ph)PEPCTK_
_EEPSQNDIS(ph)PK_
_EGS(ph)PIPHDPEFGSK_
_EKEES(ph)PQPR_
_EKGS(ph)PGQNDQELK_
_ELSNS(ph)PLR_
_ENS(ph)SSQDPQTEGTR_
_EPPS(ph)SPLQPQK_
_ERDAEQSGS(ph)PR_
_ERPS(ph)SREDTPSR_
_ERSDYDRS(ph)R_
_ES(ph)ISPQPADSACSSPAPSTGK_
_ESDKEDGRES(ph)PSYDTPSQR_
_ESGADGASTS(ph)PR_
_ESLPPAAEPSPVS(ph)K_
_ESSTESSQSAKPVSGQDTSGNTEGS(ph)PAAEK_
_ESTSSKS(ph)PPR_
_ETES(ph)APGSPR_
_ETQS(ph)PEQVK_
_ETQS(ph)PEQVKSEK_
_FHS(ph)PSTTWSPNK_
_FSASSGGGGS(ph)R_
_FSGFSAKPNNSGEAPS(ph)SPTPK_
_GADS(ph)GEEKEEGINR_
_GCS(ph)EDHSGLDAK_
_GDAASS(ph)PAPAASVGSSQGGAR_
_GEEGS(ph)DDDETENGPKPK_
_GEQVSQNGLPAEQGS(ph)PR_
_GES(ph)EAMPR_
_GGTSQVGS(ph)PTLLSPAVPSK_
_GGVTGS(ph)PEASISGSK_
_GGVTGSPEASISGS(ph)K_
_GHTDTEGRPPS(ph)PPPTSTPEK_
_GIS(ph)SSNEGVEEPSK_
_GKAS(ph)PFEEDQNR_
_GKGS(ph)PRPQAPK_
_GLS(ph)QEGTGPPTSAGEGHSR_
_GMKDDKEEEEDGTGS(ph)PQLNNR_
_GNIETTSEDGQVFS(ph)PK_
_GNS(ph)PPSSGEACREEK_
_GPAGEAGAS(ph)PPVR_
_GPHHLDNS(ph)SPGPGSEAR_
_GPS(ph)PEGSSSTESSPEHPPK_
_GPVSGS(ph)PDSMNASR_
_GRS(ph)IDQDYER_
_GS(ph)PHYFSPFRPY_
_GSEDS(ph)PPKHAGNNESHSSR_
_GSQPPPAAESQS(ph)SLRR_
_GTDDLNPVTSTPAKPSS(ph)PPPEFSFNTPGK_
_GTDTQTPAVLS(ph)PSKTQATLKPK_
_GVS(ph)PSQAQGLGSNLVTEVR_
_GYCPAKS(ph)PK_
_HAS(ph)TSSPADK_
_HDS(ph)PEDVKR_
_HEAPS(ph)SPISGQPCGDDQNASPSK_
_HGS(ph)GPNIILTGDSSPGFSK_
_HGS(ph)VSADEAAR_
_HGSVS(ph)ADEAAR_
_HLLS(ph)PQLVQYQCGDSGK_
_HLS(ph)TCDGQNPPKK_
_HNS(ph)ISEAK_
_HPS(ph)HSTTPSGPGDEVAR_
_HQAS(ph)INELK_
_HRPS(ph)EADEEELAR_
_HRS(ph)EDCGGGPR_
_HSTENDS(ph)PTNVQQ_
_IDASKNEEDEGHSNS(ph)SPR_
_IDASKNEEDEGHSNSS(ph)PR_
_IEDVGS(ph)DEEDDSGKDKK_
_IGHHS(ph)TSDDSSAYR_
_INSGS(ph)QGATK_
_IPMTPTSSFVSPPPPTAS(ph)PHSNR_
_IPNYQLS(ph)PTKLPSINK_
_IQQNQS(ph)IR_
_IS(ph)APNVDFNLEGPK_
_ISPS(ph)SLSNNYNNMNNR_
_KAAS(ph)PSPQSVR_
_KAEGEPQEES(ph)PLK_
_KAEGEPQEES(ph)PLKSK_
_KAEGEPQEESPLKS(ph)K_
_KAEGS(ph)PSEGKK_
_KAS(ph)EIKEAEAK_
_KAS(ph)PEPEGEAAGK_
_KCEDPDS(ph)PVTKK_
_KDDDS(ph)DDESQSSHTGK_
_KDGSS(ph)PPLLEK_
_KDPSGASNPSADS(ph)PLHR_
_KEDKPEGQS(ph)PVK_
_KEEPSQNDIS(ph)PK_
_KEES(ph)PPPPK_
_KETQS(ph)PEQVK_
_KFQEQECPPS(ph)PEPTRK_
_KFS(ph)KEEPVSSGPEEAVGK_
_KFS(ph)PSQVPVQTR_
_KGAGDGS(ph)DEEVDGK_
_KKEEPSQNDIS(ph)PK_
_KKEPAITSQNS(ph)PEAR_
_KLS(ph)DASDER_
_KLTS(ph)DEEGEPSGK_
_KPQPHENS(ph)R_
_KPS(ph)EDEVLNK_
_KPS(ph)VSEEVQATPNK_
_KQQQEPTGEPS(ph)PK_
_KQS(ph)LGELIGTLNAAK_
_KRS(ph)GEAAV_
_KSLS(ph)DSESDDSK_
_KSS(ph)TVESEIASEEK_
_KTES(ph)FQNAQAGSNPK_
_KVELS(ph)ESEEDKGGK_
_KVTS(ph)SETDEIR_
_KWDGS(ph)EEDEDNSKK_
_LDNTPAS(ph)PPR_
_LDSQPQETS(ph)PELPR_
_LDSS(ph)PVSSPR_
_LEPKEES(ph)PTR_
_LGAGEGGEAS(ph)VSPEKTSTTSK_
_LGAGEGGEASVS(ph)PEKTSTTSK_
_LKS(ph)EDELRPEVDEHTQK_
_LLEVQPQVANSPSS(ph)AAQK_
_LLHS(ph)PMTK_
_LLS(ph)PQQPALQR_
_LNATAS(ph)LEQER_
_LNFDMTAS(ph)PK_
_LNS(ph)SENGEDR_
_LPLVPES(ph)PRR_
_LPS(ph)GSGAASPTGSAVDIR_
_LPS(ph)SETHPEESMYK_
_LRCDS(ph)ADLR_
_LSEKS(ph)VEER_
_LSSPAAFLPACNS(ph)PSK_
_METEADAPS(ph)PAPSLGER_
_MGPSGGEGMEPERRDS(ph)QDGSSYR_
_MPIVGLGTWKS(ph)PLGK_
_MS(ph)GFIYQGK_
_NAASFPLRS(ph)PQPVCSPAGSEGTPK_
_NAS(ph)ASFQELEDKK_
_NCPPS(ph)PLPLISK_
_NDKS(ph)EEEQSSSSVK_
_NEEDEGHSNSS(ph)PR_
_NEEPS(ph)EEEIDAPKPK_
_NEEPVRS(ph)PER_
_NEEPVRS(ph)PERR_
_NEGS(ph)ESAPEGQAQQR_
_NFILDQTNVS(ph)AAAQR_
_NGES(ph)PIYMYLQR_
_NHSDSSTSESEVSSVS(ph)PLK_
_NLS(ph)STTDDEAPR_
_NMPNKQPESS(ph)L_
_NQGGYGGSSSS(ph)SSYGSGR_
_NRS(ph)AEEGELAESK_
_NSQEDS(ph)EDSEDKDVK_
_NSS(ph)PAPPQPAPGK_
_NSS(ph)SSSTDSETLR_
_NSSQSGGKPGS(ph)SPITK_
_NSSTETDQQPHS(ph)PDSSSSVHSIR_
_NTETQPTS(ph)PQLGTK_
_NTGVSPASRPSPGTPTS(ph)PSNLTSGLK_
_NVHS(ph)EDFENR_
_PCSEETPAIS(ph)PSK_
_PLQKGS(ph)HPMCK_
_PMEEDGEEKS(ph)PSK_
_PSPGTPTS(ph)PSNLTSGLK_
_PVSSAASVYAGAGGS(ph)GSR_
_QELGS(ph)PEER_
_QEMQEVQSS(ph)R_
_QEQLS(ph)PK_
_QLEEPGAGTPS(ph)PVR_
_QPSS(ph)PYEDKDK_
_QQS(ph)PQEPK_
_QRS(ph)IQEDTK_
_RAS(ph)ISEPSDTDPEPR_
_RCS(ph)DPSLNEK_
_RDS(ph)QDGSSYR_
_RES(ph)KPEEPPPPK_
_RES(ph)PSEERLEPK_
_REVS(ph)PAPAVAGQSK_
_RGNDPLTSS(ph)PGR_
_RGS(ph)GSPEDTPR_
_RGS(ph)GVFCANCLTTK_
_RGS(ph)IGENQGEEK_
_RGS(ph)IGENQIK_
_RHS(ph)EVETDSK_
_RHS(ph)VVAGGGGGEGR_
_RIDIS(ph)PSTFR_
_RKAS(ph)PEPEGEAAGK_
_RKS(ph)LSDSESDDSK_
_RKS(ph)VPSETVVEDSR_
_RLS(ph)DEHEPEQR_
_RLS(ph)EQLAHTPTAFK_
_RLS(ph)GEER_
_RLSNVS(ph)LPGPGLSVPR_
_RNS(ph)FTPLSSSNTIR_
_RNS(ph)LTGEEGQLAR_
_RPAEATSS(ph)PTSPERPR_
_RPAS(ph)VSSSAAVEHEQR_
_RPDHS(ph)GGSPSPPTSEPAR_
_RPEGPGAQAPS(ph)SPR_
_RPEGPGAQAPSS(ph)PR_
_RPES(ph)APAESSPSK_
_RPMEEDGEEKS(ph)PSK_
_RPMEEDGEEKSPS(ph)K_
_RPS(ph)DSGPPAER_
_RQS(ph)LTSPDSQSAR_
_RQS(ph)SGSATNVASTPDNR_
_RRS(ph)PPPGPDGHAK_
_RS(ph)EEKEAGEI_
_RSNS(ph)TTQVSQPR_
_RSS(ph)GREEDDEELLR_
_RSS(ph)RDMAGGAGPR_
_RTS(ph)IHDFLTK_
_S(ph)AGALEEGTSEGQLCGR_
_S(ph)ASSDTSEELNSQDSPPK_
_S(ph)DSEATISR_
_S(ph)DSRAQAVSEDAGGNEGR_
_S(ph)FTAADSKDEEVK_
_S(ph)GSSQELDVKPSASPQER_
_S(ph)KSQSSSNCSNPISVPLR_
_S(ph)LSDSESDDSK_
_S(ph)LSSSLQAPVVSTVGMQR_
_S(ph)LTNSHLEK_
_S(ph)PESCSKPEK_
_S(ph)PGEPGGAAPER_
_S(ph)PGETSKPR_
_S(ph)PGNTSQPPAFFSK_
_S(ph)PPLPAVIR_
_S(ph)PPSTGSTYGSSQK_
_S(ph)PSFGGASEASAR_
_S(ph)PSGVLSEPSQESK_
_S(ph)REDLSAQPVQTK_
_S(ph)RSPGSPVGEGTGSPPK_
_S(ph)SISGSLPSSGSLQAVSSR_
_S(ph)SPAAFINPPIGTVTPALK_
_S(ph)SPVVNDGVVR_
_S(ph)SSPAGETEGDREPQAR_
_S(ph)SSPAPADIAQTVQEDLR_
_S(ph)SSPIRLPEMSGGQTNR_
_S(ph)SSPVQVEEEPVR_
_S(ph)TSATDTHHVEMAR_
_S(ph)TSHTSDFNPNSGSDQR_
_S(ph)VHREESCSDSGTK_
_S(ph)VVGTPAYLAPEVLLNQGYNR_
_SAS(ph)PDGGPR_
_SCGHQTS(ph)ASSLK_
_SCTPS(ph)PDQISHR_
_SDEGQLS(ph)PATR_
_SDES(ph)PKPGK_
_SDS(ph)RAQAVSEDAGGNEGR_
_SDTS(ph)PVAGK_
_SEAGHASS(ph)PDSEVTSLCQK_
_SEGS(ph)PVLPHEPAK_
_SES(ph)LESPR_
_SES(ph)TENQSYAK_
_SETAPAETATPAPVEKS(ph)PAK_
_SETAPAETATPAPVEKS(ph)PAKK_
_SFS(ph)LASSSNSPISQR_
_SGAASMPS(ph)SPK_
_SGIIPTS(ph)PTPYTYNK_
_SGMS(ph)PEQSR_
_SGS(ph)YSYLEER_
_SGTLKS(ph)PPKGFDTTAINK_
_SHS(ph)PSASQSGSQLR_
_SHS(ph)SPASLQLGTGAGAAGSPAQQHAHLR_
_SINHQIES(ph)PSER_
_SKFS(ph)PQK_
_SKS(ph)EDMDNVQSK_
_SKS(ph)PLPPEEEAK_
_SKS(ph)QSSSNCSNPISVPLR_
_SLGNILQAKPTS(ph)SPAKGPPQK_
_SLS(ph)DSESDDSK_
_SLS(ph)SPTVTLSAPLEGAK_
_SLSGSS(ph)PCPK_
_SNGELSES(ph)PGAGK_
_SNS(ph)EDKLNSK_
_SNS(ph)FSDER_
_SNS(ph)FSDKGEER_
_SNS(ph)LVSTFTMEK_
_SNS(ph)VSLVPPGSSHTLPR_
_SQEPS(ph)PVGSR_
_SQS(ph)LPGADSLLAKPIDK_
_SQS(ph)SDTEQQSPTSGGGK_
_SQS(ph)TTSDVPANYK_
_SQTGDVS(ph)PK_
_SRFHS(ph)PSTTWSPNK_
_SRNS(ph)PLLER_
_SRTS(ph)PITR_
_SSEPVKETVQTTQS(ph)PTPVEK_
_SSGHSSSELS(ph)PDAVEK_
_SSGS(ph)LGHRPSQEMDK_
_SSMS(ph)GLHLVK_
_SSS(ph)VGSSSSYPISPAVSR_
_SSSISEEKGDS(ph)DDEKPR_
_SSSSSSQPEHSAMLVSTAAS(ph)PSLIK_
_STDSEVSQS(ph)PAK_
_STFREES(ph)PLR_
_STGS(ph)ATSLASQGER_
_STS(ph)TPNVHMVSTTLPVDSR_
_STVTGERQS(ph)GDGQESTEPVENK_
_SVCPGGSS(ph)PGSSSGGGR_
_SVDQGGGGS(ph)PR_
_SVS(ph)CDNVSK_
_SYS(ph)PDGKESPSDK_
_SYS(ph)PDGKESPSDKK_
_TAADVVS(ph)PGANSVDSR_
_TADGRVS(ph)PAGGTLDDKPK_
_TAS(ph)NPKVENEDEPVR_
_TAS(ph)QEGCQELTQEQR_
_TCS(ph)FGGFDLTNR_
_TDNS(ph)EVFWIDPTPNK_
_TDSS(ph)PNQAR_
_TDSS(ph)PNQAVR_
_TEIKEEEDQPSTSATQSS(ph)PAPGQSK_
_TGS(ph)ESSQTGTSTTSSR_
_TGSES(ph)SQTGTSTTSSR_
_TIFPHTAGS(ph)NK_
_TKS(ph)DTEPQK_
_TKS(ph)SSEEVLER_
_TLS(ph)KEEETKK_
_TLSSPS(ph)LQTDGIAATPVPPPPPPK_
_TPAPPEPGS(ph)PAPGEGPSGR_
_TPHVQAVQGPLGS(ph)PPKR_
_TPS(ph)PAAEDAREPEAK_
_TPSPKEEDEEPES(ph)PPEKK_
_TQLS(ph)QAEVHK_
_TQTCTSSSLS(ph)PTK_
_TQTPPVS(ph)PAPQPTEER_
_TS(ph)SPHKEESPK_
_TSES(ph)PSKPGEK_
_TSQVGAASAPAKES(ph)PR_
_TSS(ph)FTEQLDEGTPNR_
_TTHS(ph)PYEER_
_TTSS(ph)SDLTTSSSSSGPR_
_TVFPGAVPVLPAS(ph)PPPK_
_TVS(ph)TSSQPEENVDR_
_TYS(ph)APAINAIQGGSFESPK_
_VAASGAQDPEKS(ph)PDRLK_
_VATLNS(ph)EEESDPPTYK_
_VDDKPSS(ph)PGDSSK_
_VDGKTS(ph)PIQSK_
_VGS(ph)PSGDAASSTPPSTR_
_VIEGKNS(ph)SAVEQDHAK_
_VISRPPPS(ph)VSPPK_
_VLS(ph)PPKLNEVSSDANR_
_VNDAEPGS(ph)PEAPQGK_
_VNGDAS(ph)PAAAESGAK_
_VPLAPITDPQQLQLS(ph)PLK_
_VPS(ph)PGMEEAGCSR_
_VQEKPDS(ph)PGGSTQIQR_
_VQMTS(ph)PSSTGSPMFK_
_VSDS(ph)PSHIATK_
_VSQS(ph)PSKDSEENPATEERPEK_
_VSSPLPS(ph)PSAMTDAANSQAAAK_
_VSTVTSPS(ph)R_
_VVS(ph)PTKEQVSDTEDKQR_
_YQEQGGEAS(ph)PQR_
_YQEQGGEAS(ph)PQSR_
_YRSDS(ph)QDEVEK_
_YTGEEDGAGGHS(ph)PAPPQTEECLR_
_YYS(ph)PCEEHPAETNQNEGAESGTIR_
_AAGM(ox)SS(ph)PGAQSHPEELPR_
_AGDPGEM(ox)PQS(ph)PTGLGQPK_
_AHFNAM(ox)FQPS(ph)SPTR_
_ARS(ph)PSVAAM(ox)ASPQLCR_
_DKKS(ph)PLIESTANM(ox)DNNQSQK_
_ENAS(ph)PAPGTTAEEAM(ox)SR_
_LESESTS(ph)PSLEM(ox)K_
_LNFDM(ox)TAS(ph)PK_
_M(ox)ALPPQEDATAS(ph)PPR_
_M(ox)GLSFS(ph)LFPLR_
_M(ox)GQAPSQSLLPPAQDQPRS(ph)PVPSAFSDQSR_
_M(ox)SQPGS(ph)PSPK_
_PSM(ox)S(ph)PTPLDR_
_RPM(ox)EEDGEEKS(ph)PSK_
_S(ph)LSSSLQAPVVSTVGM(ox)QR_
_S(ph)TSTPNVHM(ox)VSTTLPVDSR_
_SGM(ox)S(ph)PEQSR_
_SQS(ph)MDAM(ox)GLSNK_
_SSM(ox)S(ph)GLHLVK_
_SSSSSSQPEHSAM(ox)LVSTAAS(ph)PSLIK_
_STS(ph)TPNVHM(ox)VSTTLPVDSR_
_SVS(ph)PTTEM(ox)VSNESVDYR_
_TGSSS(ph)PPGGPPKPGSQLDSM(ox)LGSLQSDLNK_
_TYS(ph)FTSAM(ox)SR_
_VPS(ph)PGM(ox)EEAGCSR_
_VQM(ox)TS(ph)PSSTGSPMFK_
_VQMTS(ph)PSSTGSPM(ox)FK_
_AEDGATPSPSNET(ph)PKK_
_AEGVST(ph)PLAGR_
_ATQVGEKT(ph)PKDESANQEEPEAR_
_AVT(ph)PVPTK_
_AVT(ph)PVSQGSNSSSADPK_
_DGLPRT(ph)PSR_
_DSDAGSST(ph)PTTSTR_
_EAASGT(ph)TPQK_
_EKDECT(ph)PTRK_
_EKT(ph)PATTPEAR_
_ET(ph)ERASPIK_
_FT(ph)DTRKDEQER_
_GKT(ph)PEEIR_
_IGHHST(ph)SDDSSAYR_
_IYQY(ph)IQSR_
_KAPT(ph)PQEK_
_KKEPAIT(ph)SQNSPEAR_
_KKEVDAT(ph)SPAPSTSSTVK_
_KLEST(ph)ESR_
_KRET(ph)DDEGEDD_
_KT(ph)SIDPSPESHEVMER_
_LNFDMT(ph)ASPK_
_LSWT(ph)SGPEEVK_
_NEEENIY(ph)SVPHDSTQGK_
_NST(ph)PSEPGSGR_
_QEIDEQRT(ph)K_
_QEKPAEKPAETPVAT(ph)SPTATDSTSGDSSR_
_QFSPT(ph)MSPTLSSITQGVPLDTSK_
_QPT(ph)PPFFGR_
_RHT(ph)SAEEEEPPPVK_
_RNSLT(ph)GEEGQLAR_
_RQMSLT(ph)EK_
_RQSSGSAT(ph)NVASTPDNR_
_RRHSEVET(ph)DSK_
_RSNSTT(ph)QVSQPR_
_SEAEEGEVRT(ph)PTK_
_SEDPPT(ph)TPIR_
_SGTAT(ph)PQR_
_SGYIPSNILEPLQPGTPGT(ph)QGQSPSR_
_SHT(ph)LLSPSPK_
_SPGSTPTT(ph)PTSSQAPQK_
_SQSAAVTPSSTTSST(ph)R_
_SRNEVVT(ph)PEK_
_SRPT(ph)SEGSDIESTEPQK_
_SRT(ph)PSASNDDQQE_
_T(ph)ESVPSDINNPVDR_
_T(ph)PTMPQEEAAEK_
_T(ph)PVFSFLDLTYWK_
_T(ph)SPTPPESATTVK_
_T(ph)SSFTEQLDEGTPNR_
_T(ph)SVQTEDDQLIAGQSAR_
_TAESQTPT(ph)PSATSFFSGK_
_TCSDGGPSSELAHSPT(ph)NSGKK_
_TPT(ph)PEPAEVETR_
_TPT(ph)PEPAEVETRK_
_TQLWASEPGT(ph)PPLPTSLPSQNPILK_
_TQT(ph)PPVSPAPQPTEER_
_TT(ph)PTQPSEQK_
_VKT(ph)PEMIIQKPK_
_VSESEGKLEGQATAVT(ph)PNK_
_VTAGYT(ph)GIK_
_VTSSVPLPSGST(ph)SSPGR_
_WDQTADQTPGAT(ph)PK_
_WLKSPT(ph)TPIDPEK_
_Y(ph)FMELLLEK_
_DM(ox)YDKEY(ph)YSVHNK_
_DM(ox)YDKEYY(ph)SVHNK_
_ENVT(ph)IM(ox)VK_
_HTDDEM(ox)T(ph)GYVATR_
_KQIT(ph)M(ox)EELVR_
_M(ox)ALPPQEDAT(ph)ASPPR_
_SVSPTT(ph)EM(ox)VSNESVDYR_
_TT(ph)LPM(ox)TMDR_
_AAGMSS(ph)PGAQSHPEELPR_
_AASAPAKES(ph)PR_
_AASSSSPGS(ph)PVASSPSR_
_ACAS(ph)PSAQVEGSPVAGSDGSQPAVK_
_ACPEEPAAPS(ph)PEPR_
_AEAS(ph)SPVPYLSPETNPASSTSAVNHNVNLTNVR_
_AEDMYSAQSHQAAT(ph)PPKDGK_
_AEIHAQPS(ph)DKER_
_AGDLLEDS(ph)PKRPK_
_AGGAS(ph)PAASSTAQPPTQHR_
_AGS(ph)PSPQPSGELPR_
_AGSS(ph)PAQGAQNEPPR_
_AGS(ph)SPAQGAQNEPPR_
_AIGSTSKPQES(ph)PK_
_AKTQT(ph)PPVSPAPQPTEER_
_AKT(ph)QTPPVSPAPQPTEER_
_ALASEKS(ph)PTADAKPAPK_
_ALPSLNTGSSS(ph)PR_
_ALS(ph)LGTIPSLTR_
_AMVDSQQKS(ph)PVK_
_ANS(ph)FVGTAQYVSPELLTEK_
_APQTSS(ph)SPPPVR_
_APQTSSS(ph)PPPVR_
_APS(ph)PTAEQPPGGGDSAR_
_APVQPQQS(ph)PAAAPGGTDEKPSGK_
_AQGEPVAGHES(ph)PK_
_AQGGQTQS(ph)PTK_
_AQLEPVAS(ph)PAK_
_ASELS(ph)PGR_
_ASNT(ph)STPTKGNTETSASASQTNHVK_
_AS(ph)PEPPGPESSSR_
_AS(ph)SLNFLNK_
_ASS(ph)LNVLNVGGK_
_ASS(ph)PIKQSHEPVPDTSVEK_
_ASS(ph)PSASSSSSFR_
_ASVSQTS(ph)PQSASSPR_
_ATAPQTQHVS(ph)PM(ox)R_
_ATEVSKT(ph)PEAR_
_ATHGSNS(ph)LPSSAR_
_ATPATAPS(ph)TGPR_
_ATPELGSSENSASS(ph)PPR_
_ATSSS(ph)SGSLSATGR_
_ATS(ph)SSSGSLSATGR_
_CGGVEQASSS(ph)PR_
_CLGGRS(ph)PK_
_CPS(ph)QSSSRPAAMISQPPTPPTGQPVR_
_DEILPT(ph)TPISEQK_
_DHQY(ph)QFLEDAVR_
_DLVQPDKPAS(ph)PK_
_DMYDKEY(ph)YSVHNK_
_DTS(ph)PSSGSAVSSSK_
_EANHNVS(ph)APYGR_
_EAYSGCSGPVDSECPPPPSS(ph)PVHK_
_EDKPIQCT(ph)PQK_
_EEDCHSPTS(ph)KPPKPDQPLK_
_EFTGS(ph)PPSSATK_
_EGASGRPGS(ph)PK_
_EGPEPPEEVPPPT(ph)TPPVPK_
_EISSS(ph)PTSK_
_ELPPS(ph)PEKK_
_ELS(ph)PAGSISK_
_ENIKPNET(ph)SPSFSK_
_ENPS(ph)ERK_
_EQDRVHS(ph)PCPTSGSEK_
_EQS(ph)EVSVSPR_
_EQYVPPRS(ph)PK_
_ETTSGTSTEPVKNSS(ph)PAPPQPAPGK_
_ETVQTTQS(ph)PTPVEK_
_EVNTVLADVIKHMT(ph)PDR_
_FGGS(ph)GSQVDSAR_
_FNGGHS(ph)PTHSPEK_
_GAPHS(ph)SPAR_
_GEGDAPFSEPGTTSTQRPS(ph)SPETATK_
_GEPAAAAAPEAGAS(ph)PVEK_
_GGDAKS(ph)PVLQEK_
_GGPGKLS(ph)PR_
_GKGGVTGS(ph)PEASISGSK_
_GLPSPY(ph)NMSSAPGSR_
_GPAGEAGAS(ph)PPVRR_
_GRES(ph)PAAGPR_
_GSPVSSPQNS(ph)PGTQR_
_GS(ph)SPGPRPVEGTPASR_
_GS(ph)SPSHSATSVHTSV_
_GS(ph)SQPNLSTSHSEQEYGK_
_GTDTQTPAVLS(ph)PSK_
_GTPGS(ph)PSGTQEPR_
_GTPM(ox)KPNTQAT(ph)PP_
_GTPSQS(ph)PVVGR_
_GVGSGPHPPDTQQPS(ph)PSK_
_HELS(ph)PPQKR_
_HGAGS(ph)GCLGTM(ox)EVK_
_HGQEEAAQS(ph)PYR_
_HGS(ph)FNTVQASER_
_HLS(ph)EGTNSYATR_
_HLS(ph)LPAGQVVPK_
_HNS(ph)WSSSSR_
_HSLLLSSS(ph)PNR_
_HTGPNS(ph)PDTANDGFVR_
_HTS(ph)CSSAGNDSKPVQEAPSVAR_
_IDGATQSS(ph)PAEPK_
_IDS(ph)NISPKK_
_IDTHPS(ph)PSHSSTVK_
_IGFPSTS(ph)PAK_
_IGQQVDREPGDVAT(ph)PPR_
_IHRAS(ph)DPGLPAEEPK_
_INAIY(ph)EVR_
_IPSKEEEADM(ox)SS(ph)PTQR_
_IPSKEEEADM(ox)S(ph)SPTQR_
_ISSKS(ph)PGHMVILDQTK_
_ISS(ph)PTETER_
_KAAS(ph)LTEDR_
_KADTTTPTPTAILAPGS(ph)PASPPGSLEPK_
_KAQVS(ph)PQS_
_KAS(ph)GSENEGDYNPGR_
_KAS(ph)PEAASTPR_
_KEHIPGT(ph)LR_
_KETTSGTSTEPVKNSS(ph)PAPPQPAPGK_
_KFS(ph)AACNFSNILVNQER_
_KFS(ph)WGQQR_
_KGS(ph)QITQQSTNQSR_
_KGS(ph)VSHDTVQPR_
_KGT(ph)IVKK_
_KHS(ph)DPHLLER_
_KHSQT(ph)DLVSR_
_KIS(ph)GTTALQEALK_
_KKS(ph)PIINESR_
_KLSSSDAPAQDT(ph)GSSAAAVETDASR_
_KLT(ph)PSAGK_
_KNTGS(ph)PDR_
_KPNAGGS(ph)PAPVR_
_KPPT(ph)PPEKPQR_
_KPS(ph)DGSPDTKPSR_
_KQS(ph)EGLTK_
_KRSELS(ph)QDAEPAGSQETK_
_KSEAGHASS(ph)PDSEVTSLCQK_
_KSS(ph)GTGTEPVAK_
_KSSTSGS(ph)DFDTK_
_KTGS(ph)PEIK_
_KYS(ph)ASSGGLCEEATAAK_
_LDSQEPGRQT(ph)PDR_
_LEPKEESPT(ph)R_
_LGASNS(ph)PGQPNSVK_
_LGS(ph)QHSPGR_
_LNHS(ph)PPQSSSR_
_LNSEAS(ph)PSR_
_LNTVAS(ph)PK_
_LPAQRT(ph)NR_
_LPHSSS(ph)SENIK_
_LPQSSSSESSPPS(ph)PQPTK_
_LQWPT(ph)PDLCPACHEEIK_
_LSGNTHYTPLCAPTS(ph)PNK_
_LSMEDSKS(ph)PPPK_
_LSPS(ph)PTSQR_
_LS(ph)PSPTSQR_
_LTEAPS(ph)AK_
_M(ox)AEESS(ph)SSSSSSSPTAATSQQQQLK_
_MAEESSSSSSSSS(ph)PTAATSQQQQLK_
_M(ox)ETVSNASSSSNPS(ph)SPGR_
_METVSNASSSSNPSS(ph)PGR_
_MGNLQNS(ph)PVNMNPPPLSK_
_M(ox)GSKS(ph)PGNTSQPPAFFSK_
_M(ox)NYS(ph)GDQGQTIR_
_MSFSS(ph)LKR_
_NELS(ph)QSPKK_
_NGDECAYHHPIS(ph)PCK_
_NIQES(ph)LPQR_
_NQALQT(ph)TKTPVEK_
_NQKPSQVNGAPGSPT(ph)EPAGQK_
_NQKPSQVNGAPGS(ph)PTEPAGQK_
_NQS(ph)PTEAEKPASSSLPSSPPPQLLTR_
_NQS(ph)PVLEPVGR_
_NRHS(ph)AQTEEPVQAK_
_NSPLDCGSAS(ph)PNK_
_NTDVAQS(ph)PEAPK_
_NTGVSPASRPSPGTPT(ph)SPSNLTSGLK_
_NTPSQHSHSIQHS(ph)PER_
_PAPPQEES(ph)PSSEAK_
_PET(ph)YLM(ox)PK_
_PFGSVS(ph)SPK_
_PLEGSSSEDSPPEGQAPPSHS(ph)PR_
_PSDSVSSTPAATS(ph)TPSK_
_PY(ph)DFIQDK_
_QERLS(ph)PEVAPPAHR_
_QGGVQPQAGDGAQT(ph)PKEEK_
_QGSITSPQANEQSVT(ph)PQR_
_QLVAGNS(ph)PK_
_QSHSES(ph)PSLQSK_
_QSSGPSSS(ph)PAAAAAPEKPGPK_
_RDSAS(ph)YRDR_
_RDS(ph)LGTYSSR_
_RDS(ph)PPPPAR_
_RES(ph)PSPAPK_
_RFS(ph)EDSSTSK_
_RGEGDAPFSEPGTTSTQRPS(ph)SPETATK_
_RGEGDAPFSEPGTTSTQRPSSPETAT(ph)K_
_RGFS(ph)DSGGGPPAK_
_RGS(ph)LSNAGDPEIVK_
_RHS(ph)EQVANGPTPPPR_
_RLDS(ph)SGER_
_RLS(ph)GKDTEQIR_
_RLS(ph)LGQGDSTEAATEER_
_RLSPPSSS(ph)AASSYSFSDLNSTR_
_RLS(ph)QPESAEK_
_RNS(ph)LDGGGR_
_RPAS(ph)LSTAPSEK_
_RPGS(ph)VSSTDQER_
_RPM(ox)S(ph)SPEMK_
_RPMS(ph)SPEMK_
_RPNTS(ph)PDR_
_RPPS(ph)PEPSTK_
_RPS(ph)VGSQSNQAGQGK_
_RRPS(ph)PQPSPR_
_RRS(ph)PSLSSK_
_RSQS(ph)FNSIDK_
_RSS(ph)PPPPPSGSSSR_
_RTDALTSS(ph)PGR_
_RTPHVQAVQGPLGS(ph)PPK_
_RVNDAEPGS(ph)PEAPQGK_
_SAESPTS(ph)PVTSETGSTFK_
_SAS(ph)ASHQADIK_
_SAS(ph)DTNLQK_
_SAS(ph)YPCAAPR_
_SAT(ph)LETKPESK_
_SCPS(ph)FSASSEGTR_
_SCS(ph)ASCVPHGAK_
_SDPES(ph)PIKK_
_SEAAEPPKT(ph)PPSSCDSTNAAIAK_
_SEAPAEVTHFS(ph)PK_
_SEASSS(ph)PPVVTSSSHSR_
_SEASS(ph)SPPVVTSSSHSR_
_SES(ph)LSNCSIGK_
_SES(ph)PKEPEQLR_
_SETAPAAPAAPAPAEKT(ph)PVK_
_SETS(ph)PVAPR_
_SFS(ph)TTSASSQK_
_SGAQASST(ph)PLSPTR_
_SGAQASSTPLS(ph)PTR_
_SGAS(ph)GASAAPAASAAAALAPSATR_
_SGITS(ph)PVEKR_
_SGMNS(ph)PLR_
_SGS(ph)M(ox)DPSGAHPSVR_
_SGYSSPGS(ph)PGTPGSR_
_SHISDQS(ph)PLSSK_
_SHS(ph)SSEAYEPR_
_SKS(ph)VKEDSNLTLQEK_
_S(ph)LGSTEGESESRPGK_
_SLS(ph)EQPVMDTATATEQAK_
_S(ph)LSGSSPCPK_
_SLS(ph)PPQSQSK_
_SLSSPT(ph)VTLSAPLEGAK_
_SLSSS(ph)LQAPVVSTVGM(ox)QR_
_SMS(ph)APGNLLVK_
_S(ph)NQIPTEVR_
_SNTEPQS(ph)PPIASPK_
_S(ph)PGSTPTTPTSSQAPQK_
_S(ph)PLAQMEEER_
_S(ph)PQPLHSGGR_
_SPS(ph)APAATSSASSSTSSYK_
_SPS(ph)FGGASEASAR_
_SPTTTQS(ph)PK_
_S(ph)QEM(ox)VHLVNK_
_SQSAAVT(ph)PSSTTSSTR_
_SQS(ph)AAVTPSSTTSSTR_
_SQS(ph)DLSSSSSR_
_SQS(ph)PAASDCSSSSSSASLPSSGR_
_SQS(ph)PVHLR_
_SRT(ph)PPSAPSQSR_
_SRT(ph)SVQTEDDQLIAGQSAR_
_SRTSVQT(ph)EDDQLIAGQSAR_
_S(ph)SEDVSTHAATK_
_SSGNSSSSGSGSGSTSAGSSS(ph)PGAR_
_SSPNVANQPPS(ph)PGGK_
_SS(ph)PVPPVPER_
_SSQCHTGSS(ph)PR_
_S(ph)SSLDGEHHDGYHR_
_SSS(ph)PVGLAK_
_S(ph)SSVGSSSSYPISPAVSR_
_STQIENQHQGAQDTSDLM(ox)S(ph)PSKR_
_STSAPQM(ox)S(ph)PGSSDNQSSSPQPAQQK_
_STSAPQMSPGS(ph)SDNQSSSPQPAQQK_
_STSAPQMS(ph)PGSSDNQSSSPQPAQQK_
_S(ph)VASSQPAKPTK_
_SVSS(ph)PTSSNTPTPTK_
_TADAPSEPAAS(ph)PHQR_
_TAS(ph)EPNLK_
_T(ph)GSESSQTGTSTTSSR_
_T(ph)GSSSPPGGPPKPGSQLDSM(ox)LGSLQSDLNK_
_THSAGTS(ph)PTITHQK_
_TKS(ph)PTDDEVTPSAVVR_
_T(ph)KSPTDDEVTPSAVVR_
_TLNM(ox)T(ph)TSPEEK_
_TLS(ph)SSAQEDIIR_
_TPPAPKT(ph)PPSSGEPPK_
_TPS(ph)SEEISPTK_
_TPSYS(ph)PTQR_
_TQPDGTSVPGEPAS(ph)PISQR_
_TRLST(ph)ASEETVQNR_
_TRLS(ph)TASEETVQNR_
_TSKEPPS(ph)SPLQPQK_
_TSQVGAASAPAKES(ph)PRK_
_T(ph)SSESIYSRPGSSIPGSPGHTIYAK_
_T(ph)SSFAEPGGGGGGGGGGPGGSASGPGGTGGGK_
_TSSLAPVVGTTTTTPS(ph)PSAIK_
_TSSVSNPQDSVGS(ph)PCSR_
_TSTTGVATTQS(ph)PTPR_
_TTAPTEGKS(ph)PLK_
_TVEVAEGEAVRTPQSVT(ph)AK_
_TVS(ph)ASSTGDLPK_
_TVSS(ph)PPTSPR_
_T(ph)YSAPAINAIQGGSFESPK_
_VEAEAGGSGART(ph)PPLSR_
_VGGSS(ph)VDLHR_
_VHS(ph)TSSLDSQK_
_VLDEEGS(ph)ER_
_VLNY(ph)VDWIK_
_VLS(ph)PTAAKPSPFEGK_
_VQMTSPSS(ph)TGSPMFK_
_VQNS(ph)PPVGR_
_VSAGEPGSHPS(ph)PAPR_
_VS(ph)PSPSQESLSSSK_
_VS(ph)SPVFGATSSIK_
_VTQGAAS(ph)PGHGIQEK_
_VVTQNICQY(ph)R_
_YDS(ph)SNQVK_
_YGM(ox)GT(ph)SVER_
_YGMGTS(ph)VER_
_YSEEGLS(ph)PSK_
_AAAGAQASQAQLGEAAGPASETPAGT(ph)ESPHSSASPCQEHK_
_AAGGAPS(ph)PPPPVR_
_AAGSPS(ph)PLPAPDPAPK_
_AAHTEDINACTLTTS(ph)PR_
_AASVAAATTS(ph)PTPR_
_ADEASELACPT(ph)PK_
_ADEAS(ph)ELACPTPK_
_ADLNQGIGEPQS(ph)PSR_
_ADTS(ph)QEICSPR_
_AEEDEILNRS(ph)PR_
_AEQS(ph)LHDLQER_
_AEVLGHKT(ph)PEPAPR_
_AFM(ox)GT(ph)PVQK_
_AGDLLEDS(ph)PK_
_AGDPGEMPQS(ph)PTGLGQPK_
_AGGGPTLQCPPPSS(ph)PEK_
_AGGPTTPLS(ph)PTR_
_AGMTSS(ph)PDATTGQTFG_
_AGS(ph)STPGDAPPAVAEVQGR_
_AGVAAPATQVAQVTLQS(ph)VQR_
_AHSSPAS(ph)LQLGAVSPGTLTPTGVVSGPAATPTAQHLR_
_AIEPQKEEADENYNS(ph)VNTR_
_AKS(ph)PQPPVEEEDEHFDDTVVCLDTYNCDLHFK_
_AKT(ph)PVTLK_
_ALPDSQQVPSS(ph)PASK_
_ALPNNTSS(ph)SPQPK_
_ALQAPHSPSKT(ph)DGK_
_ALSAS(ph)HTDLAH_
_ALS(ph)PEGALR_
_AM(ox)ST(ph)TSISSPQPGK_
_ANT(ph)PELK_
_APAGQEEPGT(ph)PPSSPLSAEQLDR_
_APQTS(ph)SSPPPVRR_
_APS(ph)DSSLGTPSDGRPELR_
_APVPGT(ph)PDSLSSGSSR_
_APVPSTCSSTFPEELS(ph)PPSHQAK_
_APVSSTESVIQS(ph)NTPTPPPSQPLNETAEEESR_
_AQGEPVAGHES(ph)PKIPYEK_
_AQLS(ph)PGIYDDTSAR_
_AQS(ph)TDSLGTSGSLQSK_
_ARQPLSEASNQQPLS(ph)GGEEK_
_AS(ph)APSPNAQVACDHCLK_
_ASEAASQAS(ph)PSAVTSKPR_
_ASEGLDACASPT(ph)K_
_ASGDPGASGMS(ph)PR_
_AS(ph)GEMASAQYITAALR_
_ASGQAFELILS(ph)PR_
_ASHS(ph)AVDITK_
_AS(ph)PAPGSGHPEGPGAHLDM(ox)NSLDR_
_ASSHSSQTQGGGS(ph)VTK_
_AS(ph)TASPCNNNINAATAVALQEPR_
_ASTSDYQVISDRQT(ph)PK_
_ATAPQT(ph)QHVSPM(ox)R_
_ATAPQTQHVS(ph)PMR_
_ATEETGQAQSGQANCQGLS(ph)PVSVASK_
_ATSAGSS(ph)PSCSLAGR_
_AT(ph)SPSSSVSGDFDDGHHSVSTPGPSR_
_ATVTPS(ph)PVKGK_
_AVAS(ph)PEATVSQTDENK_
_AYS(ph)FCGTVEYMAPEVVNR_
_CAPSAGS(ph)PAAAVGR_
_CS(ph)VSLSNVEAR_
_DAGGGSVLKSPS(ph)QTPK_
_DAPT(ph)SPASVASSSSTPSSK_
_DAQRLS(ph)PIPEEVPK_
_DASSS(ph)PASTASSASSTSLK_
_DAT(ph)NRSPTQIVK_
_DEILPTT(ph)PISEQK_
_DELHIVEAEAM(ox)NYEGS(ph)PIK_
_DFQEYVEPGEDFPAS(ph)PQRR_
_DFTQY(ph)IFTEK_
_DGEQS(ph)PNVSLM(ox)QR_
_DGEQS(ph)PNVSLMQR_
_DIDISS(ph)PEFK_
_DKKS(ph)PLIESTANMDNNQSQK_
_DKS(ph)PSSLLEDAK_
_DLS(ph)PTLIDNSAAK_
_DLTHSDS(ph)ESSLHM(ox)SDR_
_DPAQPM(ox)S(ph)PGEATQSGAR_
_DPS(ph)ASPGDAGEQAIR_
_DQTAS(ph)APATPLVNK_
_DRPPCS(ph)PSR_
_DSALAEAPEGLS(ph)PAPPAR_
_DSSFTEVPRS(ph)PK_
_DTCIQS(ph)PSKECQK_
_DTLS(ph)NPQSPQPSPYNSPK_
_DVTGS(ph)PPAK_
_DYTGCS(ph)TSESLSPVK_
_EATGLS(ph)PQAAQEK_
_EEHGGLIRS(ph)PR_
_EFTGS(ph)PPSSATKK_
_EGQSPASQAGTQHPPAQATAHS(ph)QSSPEFK_
_EGS(ph)HSPLDSADVR_
_EGS(ph)QGELTSQSNAPR_
_EHSLQVS(ph)PSLEK_
_EIESS(ph)PQYR_
_EIPSATQS(ph)PISK_
_EKELS(ph)PPPGLPSK_
_EKEVDGLLTSEPM(ox)GS(ph)PVSSK_
_EKT(ph)PELPEPSVK_
_ELSDQATAS(ph)PIVAR_
_ENAS(ph)PAPGTTAEEAMSR_
_ENQEPLRS(ph)PEVGDEEALRPLTK_
_EPAITS(ph)QNSPEAR_
_EREDSGDAEAHAFKS(ph)PSK_
_ES(ph)SPEKEAEEGCPEKESEEGCPK_
_ESVSTASDQPSHS(ph)LER_
_ETPHS(ph)PGVEDAPIAK_
_ETVQT(ph)TQSPTPVEK_
_EVDGLLTSEPM(ox)GS(ph)PVSSK_
_EVQAEQPS(ph)SSSPRR_
_EYIPGQPPLSQSSDS(ph)SPTR_
_FAS(ph)DDEHDEHDENGATGPVKR_
_FGTFGGLGS(ph)K_
_FIHQQPQSSS(ph)PVYGSSAK_
_FNFS(ph)GSKVQTPEVDVK_
_FNKS(ph)YNGTVD_
_FQSQADQDQQASGLQS(ph)PPSR_
_FSDSTSKT(ph)PPQEELPTR_
_GAQASSGS(ph)PALPR_
_GDTVSAS(ph)PCSAPLAR_
_GEAAAERPGEAAVASS(ph)PSK_
_GEPNVSY(ph)ICSR_
_GEPPTPPS(ph)PAPAPAVAPGGSSESSSGR_
_GFTECEM(ox)TKSS(ph)PLK_
_GGAPDPSPGATATPGAPAQPS(ph)SPDAR_
_GGAPDPSPGATATPGAPAQPSS(ph)PDAR_
_GGAPDPSPGATATPGAPAQPS(ph)SPDARR_
_GGGT(ph)PDANSLAPPGK_
_GGGTSSGGSST(ph)NSLTGSRPPK_
_GGLS(ph)PANDTGAK_
_GGPASVPSS(ph)SPGTSVK_
_GGPGAAPGGASPASSSSAASS(ph)PSSGR_
_GGS(ph)YSQAASSDSAQGSDVSLTACK_
_GGVTGSPEAS(ph)ISGSKGDLK_
_GHSSLT(ph)NSPLDSSCK_
_GIPLAT(ph)GDTSPEPELLPGAPLPPPK_
_GKT(ph)PEEIRK_
_GLPSPYNMSSAPGS(ph)R_
_GNAEGS(ph)SDEEGKLVIDEPAK_
_GNAEGS(ph)SDEEGKLVIDEPAKEK_
_GNDPLTSS(ph)PGR_
_GNKS(ph)PSPPDGSPAATPEIR_
_GPAPAPQQCS(ph)EPETK_
_GPPDFSSDEEREPT(ph)PVLGSGAAAAGR_
_GPPQS(ph)PVFEGVYNNSR_
_GPSPSS(ph)PTPPAAAAPAEQAPR_
_GPSPS(ph)SPTPPAAAAPAEQAPR_
_GPVS(ph)PSVSFQPLAR_
_GQGT(ph)PPSGPGVVR_
_GQKS(ph)PGALETPSAAGSQGNTASQGK_
_GRPPAEKLS(ph)PNPPK_
_GRS(ph)PPERPVPGTPK_
_GSGHSQEQPAPQPSGGDPS(ph)PPQER_
_GSGVAQSPQQPPPQQQQQQPPQQPT(ph)PPK_
_GSPATS(ph)PHLGR_
_GS(ph)PNTASAEATLPR_
_GS(ph)PSGGSTAEASDTLSIR_
_GS(ph)SAGGGGSGAAAATAATAGGQHR_
_GS(ph)SLSGTDDGAQEVVK_
_GS(ph)SPTPPCSPVQPSK_
_GSSPTPPCS(ph)PVQPSK_
_GSWSS(ph)APTSR_
_GT(ph)EASPPQNNSGSSSPVFTFR_
_GTPMKPNTQAT(ph)PP_
_GVESSDVHPAPTVQQMS(ph)SPKPAEER_
_GVQKPAGPS(ph)TSPDGNSR_
_GYYSPYSVSGSGS(ph)TAGSR_
_HELQANCY(ph)EEVKDR_
_HGS(ph)DPAFAPGPR_
_HGTDLWIDNMSSAVPNHS(ph)PEKK_
_HIISATSLSTS(ph)PTELGSR_
_HKM(ox)S(ph)PPPSGFGER_
_HLS(ph)ESSGKPLSTK_
_HLSTPSSVS(ph)PEPQDSAK_
_HNGSLS(ph)PGLEAR_
_HPSS(ph)PSALR_
_HQAS(ph)INELKR_
_HRSSISGS(ph)LPSSGSLQAVSSR_
_HSCS(ph)GSSPPR_
_HS(ph)LEEGLDMVNR_
_HS(ph)PIKEEPCGSLSETVCK_
_HSS(ph)ETFSSTPSATR_
_HSS(ph)NPPLESHVGWVMDSR_
_HSS(ph)TGDSADAGPPAAGSAR_
_HS(ph)VTGYGDCAVGAR_
_HTDDEM(ox)TGY(ph)VATR_
_HTDDEMTGY(ph)VATR_
_HVDSLSQRS(ph)PK_
_HVS(ph)PVTPPR_
_HVT(ph)SNASDSESSYR_
_IAASSS(ph)FR_
_IACKS(ph)PPPESM(ox)DTPTSTR_
_IACKS(ph)PPPESMDTPTSTR_
_IACKS(ph)PPPESVDTPTSTK_
_ICTEQSNS(ph)PPPIR_
_IDAGTMAEPSAS(ph)PSK_
_IDGATQS(ph)SPAEPK_
_IEDVGS(ph)DEEDDSGKDK_
_IEVKEES(ph)PQSK_
_IQNTGDY(ph)YDLYGGEK_
_IQSSPGALSEDKCS(ph)PK_
_ISKYS(ph)QTESQQIR_
_ISQRDPSPES(ph)NK_
_KAAS(ph)TDLGAGETVVGK_
_KAEPSEVDM(ox)NS(ph)PK_
_KAEPSEVDMNS(ph)PK_
_KAPAGQEEPGT(ph)PPSSPLSAEQLDR_
_KAS(ph)ESTTPAPPTPR_
_KAS(ph)VVDPSTESSPAPQEGSEQPASPASPLSSR_
_KCS(ph)QTQCPR_
_KDAS(ph)SSPASTASSASSTSLK_
_KDS(ph)LTQAQEQGNLLN_
_KEQSEVSVS(ph)PR_
_KEVS(ph)PEVVR_
_KGDRS(ph)PEPGQTWTR_
_KGGSYSQAASS(ph)DSAQGSDVSLTACK_
_KGGS(ph)YSQAASSDSAQGSDVSLTACK_
_KIS(ph)GTTALQEALKEK_
_KKEPAITS(ph)QNSPEAR_
_KLS(ph)DDPCPVESK_
_KLS(ph)DINQEEASGTSLHQK_
_KLS(ph)EADNRK_
_KLS(ph)GDQITLPTTVDYSSVPK_
_KLS(ph)GDQPAAR_
_KLSLGQY(ph)DNDAGGQLPFSK_
_KLS(ph)LGQYDNDAGGQLPFSK_
_KLS(ph)LSEGK_
_KLS(ph)PTEPK_
_KLS(ph)QSFALPVTGGTVVTPK_
_KLS(ph)SGETVTYQK_
_KLSVPT(ph)SDEEDEVPAPKPR_
_KNQKPSQVNGAPGS(ph)PTEPAGQK_
_KPDS(ph)PPKVLEPENK_
_KPIKS(ph)PSK_
_KPLSLAGDEETECQSS(ph)PK_
_KPRPS(ph)EGDEDCLPASK_
_KPTAEAS(ph)PVK_
_KPVTVSPTTPTS(ph)PTEGEAS_
_KQS(ph)LPATSIPTPASFK_
_KQSVFSAPS(ph)LSAGASAAEPLDR_
_KRS(ph)PTESVNTPVGK_
_KSS(ph)INEQFVDTR_
_KSS(ph)LTQEEAPVSWEK_
_KSS(ph)PSTGSLDSGNESK_
_KS(ph)VSSPTSSNTPTPTK_
_KT(ph)EMDKSPFNSPSPQDSPR_
_KTS(ph)EDQAAILPGK_
_KVVVS(ph)PTK_
_LADCEQS(ph)PTSSR_
_LATKS(ph)SPVK_
_LATNTS(ph)APDLK_
_LCDFGSASHVADNDITPYLVS(ph)R_
_LDQPVSAPPS(ph)PR_
_LEEPPELNRQS(ph)PNPR_
_LEEPTPAPSTSYS(ph)PQADSLR_
_LEKPETQSS(ph)PITVQSSK_
_LESGM(ox)QNMS(ph)IHTK_
_LGAGEGGEASVS(ph)PEK_
_LGAGGGS(ph)PEKSPSAQELK_
_LGAGGGS(ph)PEKSPSAQELKEQGNR_
_LGHPEALSAGTGS(ph)PQPPSFTYAQQR_
_LGVSVS(ph)PSR_
_LITSEEERS(ph)PAK_
_LKS(ph)EDGVEGDLGETQSR_
_LPAKLS(ph)ISK_
_LPDLS(ph)PVENK_
_LPS(ph)QTESVTSNR_
_LQQGAGLESPQGQPEPGAAS(ph)PQR_
_LREQGTES(ph)R_
_LRLS(ph)PSPTSQR_
_LSASTASELS(ph)PK_
_LSCS(ph)LEDLR_
_LSEEAECPNPST(ph)PSK_
_LSGEHS(ph)ESSTPR_
_LSLEGDHSTPPSAYGS(ph)VK_
_LSM(ox)EDS(ph)KSPPPK_
_LS(ph)PIPEEVPK_
_LSVPT(ph)SDEEDEVPAPKPR_
_LSVPTS(ph)DEEDEVPAPKPR_
_LTFDTTFS(ph)PNTGK_
_LTQTS(ph)STEQLNVLETETEVLNK_
_LTVENS(ph)PKQEAGISEGQGTAGEEEEK_
_LTWHS(ph)CPEDEAQ_
_LVEPHS(ph)PSPSSK_
_LYNSEESRPYT(ph)NK_
_LYSSEESRPYT(ph)NK_
_M(ox)APALSGANLTS(ph)PR_
_MAPALSGANLTS(ph)PR_
_MESSFGS(ph)PSKQESSESLPK_
_M(ox)KSSS(ph)SVTTSETQPCTPSSSDYSDLQR_
_MNKS(ph)SSDLEK_
_MQNNSSPS(ph)ISPNTSFTSDGSPSPLGGIK_
_MVSQSQPGS(ph)R_
_NDS(ph)PTQIPVSSDVCR_
_NEMGIPQQTTS(ph)PENAGPQNTK_
_NFKPS(ph)PSK_
_NKS(ph)PAAVTEPETNK_
_NKS(ph)TESLQANVQR_
_NKS(ph)VSNMEK_
_NKT(ph)STTSSMVASAEQPR_
_NLGS(ph)INTELQDVQR_
_NLKT(ph)LQK_
_NLNNSNLFS(ph)PVNR_
_NLS(ph)NEELTK_
_NNDQPQSANANEPQDSTVNLQS(ph)PLK_
_NPSDSAVHS(ph)PFTK_
_NQS(ph)SEDILR_
_NSATFKS(ph)FEDR_
_NSGSDGSPS(ph)PLLAR_
_NS(ph)LESISSIDR_
_NSNSPPS(ph)PSSMNQR_
_NSNS(ph)PPSPSSMNQR_
_NSPQT(ph)PPGR_
_NSPTFKS(ph)FEEK_
_NSSNTSVGS(ph)PSNTIGR_
_NS(ph)SPAPPQPAPGK_
_NSSTPGLQVPVS(ph)PTVPIQNQK_
_NT(ph)SPTTQPTASGAGAPVMTGAGESTNPENSELK_
_NVSSFPDDATS(ph)PLQENR_
_NWTEDM(ox)EGGISS(ph)PVKK_
_NYQQNYQNS(ph)ESGEK_
_PAPPPQSQS(ph)PEVEQLGR_
_PAS(ph)PVAGSPK_
_PASVDGSPVS(ph)PSTNR_
_PCSEETPAIS(ph)PSKR_
_PGHVS(ph)PLQLTNIQVPQQALPTQR_
_PQPAPADGADPPPAEEPEARPDGEGS(ph)PGK_
_PRECDS(ph)PSYQKR_
_PSS(ph)SPVIFAGGQDR_
_QAVEMKNDKS(ph)EEEQSSSSVK_
_QDDGSSSAS(ph)PSVQGAPR_
_QDDSSSSAS(ph)PSVQGAPR_
_QEASTGQSPEDHASLAPPLSPDHS(ph)SLEAK_
_QEASTGQSPEDHASLAPPLS(ph)PDHSSLEAK_
_QEKPAEKPAETPVATSPT(ph)ATDSTSGDSSR_
_QGQSQAASSSSVTS(ph)PIK_
_QGSITS(ph)PQANEQSVTPQR_
_QGSIT(ph)SPQANEQSVTPQR_
_QGSITSPQANEQSVT(ph)PQRR_
_QGS(ph)PGSVSK_
_QKS(ph)DHGAYSQSPAIK_
_QLS(ph)SGVSEIR_
_QLS(ph)SSSSYSGDISR_
_QLS(ph)TEQAVLQESLEK_
_QLVAGNS(ph)PKK_
_QNSPAGNKENIKPNET(ph)SPSFSK_
_QNS(ph)PVTQDGIQESPWQDR_
_QPEYSPES(ph)PR_
_QPT(ph)PPSEAAASK_
_QPVSEPPADQVASDMPHS(ph)PTLR_
_QQFS(ph)PSMTER_
_QQLS(ph)PSPGQEAGILPETEK_
_QSPAS(ph)PPPLGGGAPVR_
_QSS(ph)GPGASSGTSGDHGELVVR_
_QS(ph)SLTFQSSDPEQM(ox)R_
_QS(ph)SLTFQSSDPEQMR_
_QSS(ph)SSDTDLSLTPK_
_QTLPSSPT(ph)TTK_
_QTS(ph)LVSSR_
_QVLQST(ph)QSPR_
_QVPVMQGTGMQGASIQGGSQPGGFS(ph)PGQNQVTPQDHEK_
_RAAS(ph)SDQLR_
_RADLNQGIGEPQSPS(ph)R_
_RADLNQGIGEPQS(ph)PSR_
_RAGDLLEDS(ph)PK_
_RAPS(ph)VANVGSHCDLSLK_
_RAQS(ph)TDSLGTSGSLQSK_
_RAS(ph)PNSDDTVLSPQELQK_
_RAS(ph)QGLLSSIENSESDSSEAKEEGSR_
_RATASEQPLAQEPPASGGS(ph)PATTK_
_RCS(ph)VTSM(ox)ESTVSSGTQTTVQDDPEQFEVIK_
_RDS(ph)LTGSSDLYK_
_RDS(ph)SDTTPLLNGSSQDR_
_RDS(ph)SESQLASTESDKPTTGR_
_RES(ph)LSTSSDLYK_
_RGIS(ph)SSNEGVEEPSK_
_RGPEVTSQGVQTS(ph)SPACK_
_RGPEVTSQGVQTSS(ph)PACK_
_RGPNYTSGYGTNSELSNPS(ph)ETESER_
_RGS(ph)LPDTQPSQGPSTPK_
_RGSLPDT(ph)QPSQGPSTPK_
_RGS(ph)PVPPVPER_
_RGS(ph)SDPTVQR_
_RHNS(ph)WSSSSR_
_RHSS(ph)ETFSSTPSATR_
_RIS(ph)QSQPVR_
_RIS(ph)QVSSGETEYNPTEAR_
_RKELEEVS(ph)PETPVVPATTQR_
_RKPS(ph)VPDSASPADDSFVDPGER_
_RKS(ph)QMEEVQDELIHR_
_RKST(ph)DSVPISK_
_RLNHS(ph)PPQSSSR_
_RLS(ph)ESLHVVDENKNESK_
_RLS(ph)ESSALK_
_RLS(ph)GGSHSYGGESPR_
_RLS(ph)MSEVKDDNSATK_
_RLS(ph)NSSLCSIEEEHR_
_RLS(ph)TSPDVIQGHQPR_
_RM(ox)NS(ph)TGGQTPR_
_RM(ox)S(ph)GEPIQTVESIR_
_RNS(ph)CNVGGGGGGFK_
_RNS(ph)NSPPSQNMSSPR_
_RNS(ph)SIVGR_
_RNS(ph)VERPAEPVAGAATPSLVEQQK_
_RPAAAAAAGSAS(ph)PR_
_RPASVSSS(ph)AAVEHEQR_
_RPSQEQS(ph)ASASSGQPQAPLNR_
_RPS(ph)QNAISFFNVGHSK_
_RQEQPSIESTS(ph)PISR_
_RQSGLY(ph)DSQNPPTVNNCAQDR_
_RQS(ph)PLPPQK_
_RQS(ph)PSPSTR_
_RRES(ph)QEEPR_
_RRS(ph)PPADAIPK_
_RSEACPCQPDSGS(ph)PLPAEEEK_
_RSILESS(ph)PR_
_RSLT(ph)NSHLEK_
_RS(ph)PPEEPPDFCCPK_
_RSS(ph)AIGIENIQEVQEK_
_RSS(ph)DTSGSPATPLK_
_RSSFS(ph)MEEES_
_RSS(ph)PPGHYYQK_
_RSS(ph)PVPPVPER_
_RSS(ph)QPSPTAVPASDSPPTK_
_RSS(ph)QPSPTAVPASDSPPTKQEVK_
_RSS(ph)SDLITLPATTPPCPTK_
_RST(ph)QESLTAGGTDLKR_
_RTS(ph)MGGTQQQFVEGVR_
_RT(ph)STPVIMEGVQEETDTR_
_RVPS(ph)PTPAPK_
_RWDQTADQTPGAT(ph)PK_
_RWS(ph)AEVTSSTYSDEDRPPK_
_RYPSSISSS(ph)PQK_
_RYPSSISS(ph)SPQKDLTQAK_
_RYS(ph)PPIQR_
_SAMDSPVPASMFAPEPS(ph)SPGAAR_
_S(ph)ASQSSLDKLDQELK_
_SASS(ph)DTSEELNSQDSPPK_
_SASS(ph)GAEGDVSSEREP_
_SAS(ph)WGSADQLK_
_SATDGNT(ph)STTPPTSAK_
_SAT(ph)YSVGMQK_
_SCFESS(ph)PDPELK_
_SCS(ph)FSSESR_
_SCS(ph)M(ox)NQLSSGIPVPKPR_
_SCS(ph)SSSAVIVPQPEDPDR_
_SDAEEDGGTVS(ph)QEEEDRKPK_
_SDKS(ph)PDLAPTPAPQSTPR_
_SEAAGSPDQGSTYS(ph)PAR_
_SELGNQS(ph)PSTSSR_
_S(ph)ESPKEPEQLRK_
_SES(ph)PPPLSDPK_
_S(ph)ESSGILPNTTDM(ox)R_
_SETAPAAPAAPAPAEKT(ph)PVKK_
_SETSWES(ph)PK_
_SEVQQPVHPKPLSPDS(ph)R_
_SEVQQPVHPKPLS(ph)PDSR_
_SGAHSSAS(ph)PPR_
_SGAQAS(ph)STPLSPTR_
_S(ph)GEGEVSGLM(ox)R_
_S(ph)GEGEVSGLMR_
_S(ph)GEQITSSPVSPK_
_SGGLQT(ph)PECLSR_
_SGGSGHAVAEPAS(ph)PEQELDQNK_
_S(ph)GSIQQMEQLNR_
_SGS(ph)MDPSGAHPSVR_
_SGSS(ph)SPDSEITELK_
_SHHAPM(ox)S(ph)PGSSGGGGQPLAR_
_SHISDQSPLSS(ph)K_
_S(ph)IGSAVDQGNESIVAK_
_SIQPQVS(ph)PR_
_S(ph)ISNEGLTLNNSHVSK_
_S(ph)KGPSAAGEQEPDKESGASVDEVAR_
_SKPIPIMPAS(ph)PQK_
_SKS(ph)DGEAKPEPSPSPR_
_S(ph)KSDGEAKPEPSPSPR_
_SKS(ph)ETGDSSIFR_
_SKSMS(ph)DVSAEDVQNLR_
_SKS(ph)PTISDK_
_SLDGAEFSRPAS(ph)VSENHDAGPDGDKR_
_SLDSEPSVPSAAKPPS(ph)PEK_
_SLESLIYM(ox)S(ph)TR_
_S(ph)LGEQDQM(ox)TLRPPEK_
_SLHLS(ph)PQEQSASYQDR_
_SLHS(ph)VSEER_
_SLQEEQSRPPTAVSS(ph)PGGPAR_
_SLQPS(ph)SLR_
_S(ph)LSIESLCPEDGHR_
_SLS(ph)PGKENVSALDM(ox)EK_
_SLS(ph)PGKENVSALDMEK_
_SLS(ph)PSHLTEDR_
_SLS(ph)SGSNFCSEQK_
_S(ph)LSSPTVTLSAPLEGAK_
_SLS(ph)SSLQAPVVSTVGMQR_
_SLSSS(ph)PVKK_
_S(ph)LVGTPYWMAPELISR_
_SMS(ph)ENAVR_
_S(ph)NMSPDKPVSVK_
_SNS(ph)IQQM(ox)EQLNR_
_SNS(ph)IQQMEQLNR_
_SNS(ph)PLPVPPSK_
_SNVSSPATPTASSSSST(ph)TPTR_
_SNVSSPATPTASSSSS(ph)TTPTRK_
_SPAGPAATPAQAQAAST(ph)PR_
_S(ph)PAGPAATPAQAQAASTPR_
_SPAPGAPTRSPS(ph)TPAK_
_SPAVATSTAAPPPPSS(ph)PLPSK_
_SPAVATSTAAPPPPS(ph)SPLPSK_
_SPCETISS(ph)PSSTLESK_
_SPDKPGGS(ph)PSASR_
_SPGAGSLGS(ph)PASQR_
_S(ph)PGALETPSAAGSQGNTASQGK_
_SPGKAEAES(ph)DALPDDTVIESEALPSDIAAEAR_
_S(ph)PGTPRPPGASK_
_S(ph)PISDNSGCDAPGNSNPSLSVPSSAESEK_
_S(ph)PPTQVAISSDSAR_
_S(ph)PQQSAALPR_
_S(ph)PQTLAPVGEDAMK_
_SPSFGDPQLS(ph)PEAR_
_SPSGSAFGS(ph)QENLR_
_SPS(ph)GSAFGSQENLR_
_SPS(ph)PPDGSPAATPEIR_
_S(ph)PSPPTQHTGQPPGQPSAPSQLSAPR_
_S(ph)PSQESIGAR_
_SPSVPKS(ph)PTPK_
_S(ph)PTAALNESLVECPK_
_S(ph)PVPAQIAITVPK_
_S(ph)PVSTRPLPSASQK_
_SQDATFSPGSEQAEKS(ph)PGPIVSR_
_SQDSYPGSPSLS(ph)PR_
_SQDVAVS(ph)PQQQQCSK_
_SQS(ph)LQDQPTR_
_SQS(ph)MDAMGLSNK_
_SQS(ph)SDLLER_
_S(ph)QSTTFNPDDM(ox)SEPEFK_
_S(ph)QSTTFNPDDMSEPEFK_
_S(ph)QSTTFNPDDM(ox)SEPEFKR_
_SQS(ph)TTFNPDDMSEPEFKR_
_S(ph)QSTTFNPDDMSEPEFKR_
_S(ph)QVEQQQLITVEK_
_SRLT(ph)PVSPESSSTEEK_
_SRS(ph)DIDVNAAAGAK_
_SRS(ph)DIDVNAAASAK_
_SRSFT(ph)LDDESLK_
_SRS(ph)GEGEVSGLM(ox)R_
_SRS(ph)GEGEVSGLMR_
_SRS(ph)QPCVLNDKK_
_SRT(ph)ASGSSVTSLDGTR_
_S(ph)SAIGIENIQEVQEK_
_SSDQPLTVPVS(ph)PK_
_SSDVSPPLGQHETGGS(ph)PSK_
_SSFASSSASDASKPSS(ph)PR_
_S(ph)SFSSDPDESEGIPLKR_
_S(ph)SGGSEHSTEGSVSLGDGQLNR_
_SSGNSS(ph)SSGSGSGSTSAGSSSPGAR_
_SSGNSSSSGSGSGSTSAGSS(ph)SPGARR_
_S(ph)SGSPYGGGYGSGGGSGGYGSR_
_SS(ph)GSPYGGGYGSGGGSGGYGSR_
_SSGSSSSGLGTVSNS(ph)PASQR_
_SSLGQS(ph)ASETEEDTVSVSK_
_S(ph)SLYEGLEKPESR_
_S(ph)SPEQPRPSTSK_
_S(ph)SPGAGPSDHHSASR_
_S(ph)SPGGQDEGGFM(ox)AQGK_
_S(ph)SPTSASACGAQGLR_
_S(ph)SSEDAESLAPR_
_S(ph)SSESYTQSFQSR_
_SSS(ph)FGSVSTSSNSSK_
_S(ph)SSM(ox)SSIDLVSASDDVHR_
_SSS(ph)PVTELASR_
_S(ph)STPLPTISSSAENTR_
_STAQQELDGKPAS(ph)PTPVIVASHTANK_
_STEEPTAPAS(ph)PQPPNDSR_
_S(ph)TEPELIQVK_
_STFS(ph)TNYR_
_S(ph)TQESLTAGGTDLKR_
_STQIENQHQGAQDTSDLMS(ph)PSKR_
_S(ph)TSFRGGM(ox)GSGGLATGIAGGLAGMGGIQNEK_
_STT(ph)PPPAEPVSLPQEPPKPR_
_S(ph)VDIHDSIQPR_
_S(ph)VELDLNQAHMEETPK_
_SVS(ph)PTTEMVSNESVDYR_
_S(ph)VSPTTEMVSNESVDYR_
_SVSS(ph)YGNIR_
_S(ph)VSTPSEAGSQDSGDGAVGSR_
_SVS(ph)VVTGSEQK_
_SWDSSSPVDRPEPEAAS(ph)PTTR_
_SYS(ph)AGEASEVSR_
_S(ph)YSSPDITQAIQEEEK_
_SYS(ph)SPDITQAIQEEEKR_
_TAANKS(ph)PCETISSPSSTLESK_
_TAESQT(ph)PTPSATSFFSGK_
_TASESISNLS(ph)EAGSIK_
_TASESISNLSEAGS(ph)IK_
_TAS(ph)FSESR_
_TAS(ph)GSSVTSLDGTR_
_TAS(ph)LTSAASVDGNR_
_T(ph)ASQGPQTDSVIQNSENIK_
_TCDSITPSKS(ph)SPVPVSDTQK_
_T(ph)DSREDEISPPPPNPVVK_
_TEELIES(ph)PKLESSEGEIIQTVDR_
_TEIMS(ph)PLYQDEAPK_
_TEMDKS(ph)PFNSPSPQDSPR_
_TES(ph)PATAAETASEELDNR_
_T(ph)FCGTPDYIAPEIIAYQPYGK_
_T(ph)GNESGSNLSDSGSVKR_
_TGPLSTS(ph)SPSR_
_TGSCS(ph)ELDACPSK_
_T(ph)GSNISGASSDISLDEQYK_
_THS(ph)AGTSPTITHQK_
_T(ph)KFASDDEHDEHDENGATGPVK_
_TKPTQAAGPS(ph)SPQKPPTPEETK_
_TKPTQAAGPSS(ph)PQKPPTPEETK_
_TLDSGT(ph)SEIVKSPR_
_TLDSGTSEIVKS(ph)PR_
_TLEQHDNIVTHY(ph)K_
_TLGT(ph)PTQPGSTPR_
_TLNM(ox)TT(ph)SPEEK_
_TLNMTTS(ph)PEEKR_
_TLS(ph)PTPSAEGYQDVR_
_TLTDEVNS(ph)PDSDRR_
_TNKS(ph)PEAKPLPGK_
_TNSMSSSGLGS(ph)PNR_
_TNS(ph)TGGSSGSSVGGGSGK_
_T(ph)NTPVKEDWNVR_
_TNT(ph)PVKEDWNVR_
_TPASTPVSGTPQAS(ph)PM(ox)IER_
_TPQS(ph)PTLPPAK_
_TPS(ph)PAPK_
_TPTPSTPGDTQPNT(ph)PAPVPPAEDGIK_
_TPTPS(ph)TPGDTQPNTPAPVPPAEDGIK_
_TPVQYSQQQNS(ph)PQK_
_TQS(ph)LPVTEK_
_TQTESST(ph)PPGIPGGSR_
_TQT(ph)PPLGQTPQLGLK_
_TRS(ph)WDSSSPVDRPEPEAASPTTR_
_TSAVSS(ph)PLLDQQR_
_T(ph)SPLKDNPSPEPQLDDIKR_
_TSPS(ph)SPAPLPHQEATPR_
_T(ph)SPTVATQTGASATSTR_
_TSS(ph)EDNLYLAVLR_
_TSSISGPLS(ph)PAYTGQVPYNYNQLEGR_
_T(ph)SSLTQFPPSQSEER_
_TTEEQVQAS(ph)TPCPR_
_TTPATGEQS(ph)PGAR_
_TTPES(ph)PPYSSGSYDSIK_
_TTPQQGASGPGRS(ph)PVGQAR_
_T(ph)TSFKGTSPSSK_
_TTS(ph)SANNPNLMYQDECDRR_
_TTWGDGGENS(ph)PCNVVSK_
_TVDM(ox)EST(ph)EVFTK_
_TVNSTRET(ph)PPK_
_VAAAAGSGPS(ph)PPGSPGHDR_
_VASPSQGQVGSSS(ph)PK_
_VAVAT(ph)PAKK_
_VDHGAEIITQS(ph)PGR_
_VDSSTNSSPSPQQSESLSPAHT(ph)SDFR_
_VDS(ph)TTCLFPVEEK_
_VES(ph)AAGGGAGDPLGGACAGGR_
_VEY(ph)LDDR_
_VGDPPQPLPEEPM(ox)EVQGAERAS(ph)PEPQR_
_VGDPPQPLPEEPMEVQGAERAS(ph)PEPQR_
_VGDTEKPEPERS(ph)PPNR_
_VGGS(ph)SVDLHR_
_VGS(ph)TENIK_
_VIEDNEY(ph)TAR_
_VKPAS(ph)PVAQPK_
_VLDTSSLTQSAPAS(ph)PTNK_
_VLGSEGEEEDEALS(ph)PAK_
_VLQQQEQS(ph)GR_
_VLS(ph)GQDTEDR_
_VPEPPSSHSQGSGPSSGS(ph)PER_
_VPKPEPIPEPKEPS(ph)PEK_
_VQS(ph)PEPPAPER_
_VQS(ph)PSQTR_
_VQTT(ph)PPPAVQGQK_
_VSDQNS(ph)PVLPK_
_VSEEQTQPPS(ph)PAGAGM(ox)STAM(ox)GR_
_VSEEQTQPPS(ph)PAGAGM(ox)STAMGR_
_VSEEQTQPPS(ph)PAGAGMSTAM(ox)GR_
_VS(ph)GAQEMVSSAK_
_VSLEPHQGPGT(ph)PESK_
_VSTTTDSPVS(ph)PAQAASPFIPLDELSSK_
_VTAEADSSS(ph)PTGILATSESK_
_VTKNEEPS(ph)EEEIDAPKPK_
_VT(ph)SRGPDEEAVVDLGK_
_VVPSFLPVDQGGS(ph)LVGR_
_VVSQSQPGS(ph)R_
_YGMGT(ph)SVER_
_Y(ph)GNPWEK_
_YGS(ph)IVDDER_
_YHGHS(ph)M(ox)SDPGVSYR_
_YHGHSMS(ph)DPGVSYR_
_YHS(ph)QYHTVAGNDIK_
_YLLGDAPVS(ph)PSSQK_
_YMSGQTS(ph)PR_
_Y(ph)NCHQEIR_
_YNLDAS(ph)EEEDSNKK_
_YNLDAS(ph)EEEDSNKKK_
_YNTEGRVS(ph)PSPSQESLSSSK_
_YRS(ph)PYSGPK_
_YSHSGS(ph)SSPDTK_
_YSHVSQHSPS(ph)KK_
_YSHVS(ph)QHSPSKK_
_YS(ph)PPRDDDKVDNQAK_
_AAAAAATAPPS(ph)PGPAQPGPR_
_AADS(ph)DDGAVSAPAASDGGVSK_
_AAGGIILT(ph)ASHCPGGPGGEFGVK_
_AAGS(ph)PSPLPAPDPAPK_
_AAKPGPAEAPSPTASPSGDAS(ph)PPATAPYDPR_
_AAQQQQPSAS(ph)PR_
_AAS(ph)AATAAPTATPAAQESGTIPK_
_AASAPAKES(ph)PRK_
_AAS(ph)PPASASDLIEQQQK_
_AAS(ph)PPRPLLSNASATPVGR_
_AATESVPCSPS(ph)PLAGEIR_
_AAVVTS(ph)PPPTTAPHK_
_ACKVDS(ph)PTVTTTLK_
_ACSMPQELPQS(ph)PR_
_ADAASSLTVDVT(ph)PPTAK_
_ADADPSPTS(ph)PPTAR_
_ADEASELACPT(ph)PKEDGLAQQQTQLNLR_
_ADRDQS(ph)PFSK_
_ADVVPQQADPEFPRAS(ph)PR_
_AEEKS(ph)PISINVK_
_AES(ph)PESSAIESTQSTPQK_
_AES(ph)PSPAPPPGLR_
_AFVESQQKS(ph)PGK_
_AFY(ph)VPAQYVK_
_AGAGM(ox)ITQHSSNAS(ph)PINR_
_AGAPVGGS(ph)PGLAK_
_AGETRFT(ph)DTR_
_AGGGPTLQCPPPS(ph)SPEK_
_AGLQM(ox)KS(ph)PEK_
_AGTDS(ph)PVSCASVTEER_
_AGVRPS(ph)SSGSAWEACSEAPSK_
_AGVRPSS(ph)SGSAWEACSEAPSK_
_AGVRPSSSGS(ph)AWEACSEAPSK_
_AHS(ph)PALGVHSFSGVQR_
_AHTPT(ph)PGIYM(ox)GR_
_AIPGDQHPES(ph)PVHTEPM(ox)GIQGR_
_AISAPTS(ph)PTR_
_AIS(ph)PTSATSSGR_
_AKPAMPQDSVPS(ph)PR_
_ALQAPHS(ph)PSK_
_ALVEFESNPEETREPGS(ph)PPSVQR_
_ALVHQLS(ph)NESR_
_AM(ox)STTSISS(ph)PQPGK_
_AMSTTSISS(ph)PQPGK_
_AMTVEKAS(ph)PVGDGNFR_
_ANT(ph)PELKK_
_ANVS(ph)SPHR_
_APSS(ph)LSDAVPQR_
_APVSSTESVIQSNTPT(ph)PPPSQPLNETAEEESR_
_AQISS(ph)PNLR_
_AQS(ph)SPAAPASLSAPEPASQAR_
_AQS(ph)YPDNHQEFSDYDNPIFEK_
_AQTLPTSVVTITSESS(ph)PGKR_
_ART(ph)PLTAAQQK_
_ASAAFSSVGS(ph)VITK_
_ASEENLLSSSSVPS(ph)ADRDSSPTTNSK_
_ASEIDQVVPAAQS(ph)SPINCEK_
_AS(ph)GEM(ox)ASAQYITAALR_
_AS(ph)SEDTLNKPGSTAASGVVR_
_ASS(ph)LSESSPPK_
_ASSVSTKES(ph)PARK_
_AS(ph)SVTTFTGEPNTCPR_
_ASWTVQES(ph)K_
_ATRPASTSQPDPS(ph)PDR_
_AT(ph)SPLCTSTASMVSSSPSTPSNIPQKPSQPAAK_
_ATS(ph)PLCTSTASMVSSSPSTPSNIPQKPSQPAAK_
_ATSSHFS(ph)ASEESMDFLDK_
_ATS(ph)VDYSSFADR_
_ATTLSNAVSSLAS(ph)TGLSLTK_
_AVPM(ox)APAPAS(ph)PGSSNDSSAR_
_AVT(ph)PVPTKTEEVSNLK_
_AYQDQIS(ph)PVPGAPK_
_AY(ph)TNFDAER_
_CAPSAGSPAAAVGRES(ph)PGAAATSSSGPQAQQHR_
_CSDVSELSS(ph)SPPGPYHQEPYVCKPEER_
_CSGPGLS(ph)PGM(ox)VR_
_CST(ph)GSPSKDVTK_
_CSVS(ph)LSNVEAR_
_DFT(ph)PVCTTELGR_
_DILPAAEHQTTS(ph)PVQK_
_DIS(ph)GPSPSK_
_DISSS(ph)LNSLADSNAR_
_DKDSGSSS(ph)PLPK_
_DLDEEGS(ph)EKELHENVLDK_
_DM(ox)ES(ph)PTKLDVTLAK_
_DMHCLEASS(ph)PTFSK_
_DMS(ph)PLSETEMALGK_
_DNS(ph)PPPAFKPEPPK_
_DQMRANVINEIMS(ph)TER_
_DQS(ph)PFSK_
_DRS(ph)VPNLTEGSLHEPGR_
_DSGSSS(ph)PLPK_
_DSSSSLTDPQVSYVKS(ph)PAAER_
_DSSSTDS(ph)ANEKPALIPR_
_DSSVPGSPS(ph)SIVAK_
_DTLS(ph)NPQSPQPSPYNSPKPQHK_
_DVATSPIS(ph)PTENNTTPPDALTR_
_DVATSPISPTENNTT(ph)PPDALTR_
_DVT(ph)PPPETEVVLIK_
_DYSEADGLSERTT(ph)PSK_
_EAAFS(ph)PGQQDWSR_
_EAASSSSGTQPAPPAPAS(ph)PWDSKK_
_EAKPGAAEPEVGVPSSLSPS(ph)SPSSSWTETDVEER_
_EAPAEGEAAEPGSPT(ph)AAEGEAASAASSTSSPK_
_EAPAEGEAAEPGS(ph)PTAAEGEAASAASSTSSPK_
_EATNTTSEPSAPSQDLLDLSPS(ph)PR_
_EAVVDLHADDS(ph)RISEDETER_
_EDSGSVPSTGPS(ph)QGTPISLK_
_EELQANGSAPAADKEEPAAAGS(ph)GAASPSAAEK_
_EFGSLPTTPS(ph)EQR_
_EGLRPGDT(ph)TSTFCGTPNYIAPEILR_
_EGS(ph)QGELTPANSQSR_
_EGVQGPLNVS(ph)LSEEGK_
_EHASIDAQSGAGVPNPSTSAS(ph)PK_
_EHYPVSSPSS(ph)PSPPAQPGGVSR_
_EKEEPPS(ph)PIEATPPQSLLEK_
_EKEPSYPMPVQETQAPESPGENSEQALQTLS(ph)PR_
_EKEVDGLLTS(ph)EPM(ox)GSPVSSK_
_EKEVDGLLTSEPMGS(ph)PVSSK_
_ELAPEPWVERAT(ph)PT_
_ELDPSLVSANDS(ph)PSGMQTR_
_ELFDDPSY(ph)VNVQNLDK_
_ELILGSETPSS(ph)PR_
_ELNT(ph)EPR_
_ELQAAGKS(ph)PEDLER_
_ELSGGAEAGTVPT(ph)SPGKVPEDSLAR_
_ELSKEDLSPAFDHS(ph)PNK_
_ELSNS(ph)PLRENSFGSPLEFR_
_ELS(ph)PQHKR_
_ELSSEPQT(ph)PPAQK_
_EM(ox)S(ph)PSPPAAQDPGGTALVSAR_
_ENDPLRT(ph)PEALPEEK_
_EPAITSQNS(ph)PEAR_
_EPS(ph)PALGPNLDGSGLLPR_
_EQGTESRSS(ph)TPLPTISSSAENTR_
_EQMM(ox)NSSISSGS(ph)GSLR_
_EQMMNSSISSGSGS(ph)LR_
_EQSSDLTPSGDVS(ph)PVKPLSR_
_EQTLS(ph)PTITSGLHNIAR_
_ERGS(ph)SLSGTDDGAQEVVK_
_ESMEAS(ph)PEAM(ox)VK_
_ESMEAS(ph)PEAMVK_
_ESNYFGLS(ph)PEER_
_ES(ph)VDSSLKER_
_EVAENQQNQS(ph)SDPEEEKGSQPPPAAESQSSLR_
_EVDGLLTSEPMGS(ph)PVSSK_
_EVYMT(ph)PLR_
_EYGS(ph)TSSIDR_
_FGQAATM(ox)EGIGAIGGT(ph)PPAFNR_
_FICVTPTTCSNTIDLPMS(ph)PR_
_FIQELSGSS(ph)PK_
_FNDPSGCAPS(ph)PGAYDVK_
_FNS(ph)ITSAYYR_
_FNS(ph)YDISR_
_FQEQECPPSPEPT(ph)R_
_FS(ph)PGAPGGSGSQPNQK_
_FTDKDQQPS(ph)GSEGEDDDAEAALKK_
_FTSGAFLSPSVSVQECRT(ph)PR_
_GAGATS(ph)GSPPAGR_
_GAGATSGS(ph)PPAGRN_
_GALGS(ph)PVAAAGAAMQESFGCVVANR_
_GAQPGRHS(ph)VTGYGDCAVGAR_
_GAS(ph)QAGMTGYGM(ox)PR_
_GAVAAEGASDT(ph)EREEPTESQGLAAR_
_GEAAAERPGEAAVAS(ph)SPSK_
_GFGFGQGAGALVHS(ph)E_
_GGDSIGETPT(ph)PGASK_
_GGLLTSEEDSGFSTS(ph)PK_
_GGPAS(ph)PGGLQGLETR_
_GGPTSHPSPVPPPAS(ph)SPSPLSGSALCGGK_
_GGS(ph)TGGGGGFDPPPAYHEVVDAEK_
_GGTTSWGTSGQPS(ph)PSYDSSR_
_GHYEVT(ph)GSDDETGKLQGSGVSLASK_
_GILAADES(ph)TGSIAK_
_GIQLS(ph)PGVGSSAGPPGDLEDDEGLK_
_GKELSDQATAS(ph)PIVAR_
[truncated: 4,452 more rows]

## Sheet: Table S1-2nd IMAC
Table S1. Identification of the unique phosphopeptide sequence in different IMAC steps. Modified_Sequence of 2nd IMAC.
_S(ph)RQS(ph)TLY(ph)S(ph)FFPK_
_CEECGKAFS(ph)QS(ph)S(ph)T(ph)LTIHK_
_T(ph)PES(ph)T(ph)KPGPVCQPPVS(ph)QSR_
_EASALT(ph)S(ph)SAVTS(ph)VAK_
_S(ph)QS(ph)AAVTPSSTT(ph)SSTR_
_MLAQSALSPYLSS(ph)PVS(ph)S(ph)YQR_
_PS(ph)SFLY(ph)VS(ph)GAVLALR_
_S(ph)IFCTEPT(ph)S(ph)NLLTLK_
_TVY(ph)T(ph)NTLLSS(ph)SVLGK_
_YEE(ph)MQ(ph)VTALNDCHQ(ph)LR_
_ACCT(ph)LASSPSWPPS(ph)PS(ph)PP_
_GT(ph)GGT(ph)AVMS(ph)FLK_
_NKSKT(ph)S(ph)T(ph)K_
_PQSRS(ph)S(ph)T(ph)AK_
_QNT(ph)S(ph)S(ph)VGQK_
_QTKEQS(ph)QLT(ph)AT(ph)QTR_
_SGVGLSSY(ph)LS(ph)T(ph)EKDASPK_
_Y(ph)TSLVKY(ph)DS(ph)ER_
_DVLLY(ph)S(ph)K_
_EEDFIS(ph)S(ph)PQR_
_EPAT(ph)DVFT(ph)APNSR_
_EVLLT(ph)GIQT(ph)QGAK_
_IS(ph)NENSVNY(ph)K_
_PLPLT(ph)S(ph)PSHGSLSHSK_
_TIT(ph)T(ph)TEIMNK_
_PQDDTDS(ph)S(ph)R_
_QLEPS(ph)S(ph)LWLQSVCER_
_QSSVT(ph)VT(ph)ESQFLK_
_Y(ph)TDLDS(ph)ELK_
_CS(ph)SQALAVPES(ph)TGALEK_
_EAALT(ph)STIS(ph)LR_
_ETGY(ph)T(ph)ELVK_
_LAQNILS(ph)Y(ph)LDLK_
_LNCEQPS(ph)VT(ph)LQLMNIR_
_NFLT(ph)SLVAGLS(ph)TER_
_PLTPPTTPLS(ph)PT(ph)HQNPLF_
_QS(ph)HFLLATVANSTIGGDS(ph)GGR_
_QVDEGVWPPPNNLLS(ph)QS(ph)PK_
_RS(ph)MENIELGLS(ph)EAQEEK_
_TVSSS(ph)S(ph)LK_
_UGTYT(ph)LYLIIGDAT(ph)LK_
_VGWEQLAIT(ph)T(ph)AR_
_LSLT(ph)Y(ph)ER_
_NLYWS(ph)DT(ph)EK_
_PCFS(ph)ALTPDET(ph)YVPK_
_SASVS(ph)GAAY(ph)TEIR_
_SIT(ph)NS(ph)VWIR_
_S(ph)TDDHT(ph)PWER_
_S(ph)YS(ph)LAGR_
_YLS(ph)DHSFLVS(ph)QGDR_
_YY(ph)T(ph)IQTR_
_MY(ph)ASQWFLT(ph)LFTAK_
_NMLIDIMDT(ph)S(ph)QQK_
_TDSFYHS(ph)S(ph)GGLELYGEPR_
_VFAQT(ph)S(ph)QLAR_
_EY(ph)QCHVDS(ph)CLQLAK_
_QNVLLSAT(ph)LT(ph)EGVTR_
_S(ph)FGSLAFALS(ph)QLGDHK_
_DLQT(ph)HGWLLY(ph)QEK_
_ISLAILS(ph)HFY(ph)IVK_
_LDFPQHVS(ph)S(ph)DK_
_LLFPSSHS(ph)PFS(ph)PLR_
_QNVLLS(ph)ATLT(ph)EGVTR_
_QVLS(ph)Y(ph)GQNLSFSFR_
_TS(ph)SKLEHFVS(ph)ILLK_
_VLIT(ph)T(ph)DLLSVLR_
_AHPAY(ph)HS(ph)FNK_
_QS(ph)PMQT(ph)IQENK_
_S(ph)VDNYY(ph)HLLTTR_
_AEYLHT(ph)WGGLLPVIS(ph)K_
_GAIGHIVS(ph)T(ph)EK_
_GSIS(ph)S(ph)LSNHEFWR_
_NFFT(ph)DVY(ph)DLYIK_
_VEEAS(ph)T(ph)PK_
_WVY(ph)DGEGNEY(ph)LR_
_INLNISY(ph)EINEVS(ph)VK_
_PIWVT(ph)LDT(ph)EDHK_
_YLS(ph)ELQQS(ph)EALK_
_FCS(ph)LLIIT(ph)EDSK_
_LLQPAS(ph)VT(ph)R_
_LLY(ph)S(ph)IGANVSAEK_
_MDMS(ph)VLEISGIIMS(ph)R_
_MLY(ph)QLQT(ph)IK_
_CGPGT(ph)NS(ph)TLTKQIFPWMK_
_GS(ph)AS(ph)FVK_
_NS(ph)DS(ph)FLK_
_S(ph)GIDFGS(ph)LLKK_
_ST(ph)EYTFFS(ph)APHHTYSK_
_T(ph)FHS(ph)QLLR_
_ADEDSIRKTS(ph)DSVQT(ph)K_
_DKT(ph)AIS(ph)ENLK_
_DQPGTSAVPNLAS(ph)VGT(ph)R_
_EIQFGS(ph)S(ph)IFDPVCLSA_
_ELAANSSRS(ph)T(ph)TPRGK_
_GANCDVELLKT(ph)T(ph)TR_
_GELEVGS(ph)T(ph)VEVR_
_HT(ph)LVQPVHY(ph)RYFS_
_KMS(ph)PPLDY(ph)KDDDDK_
_KTEAS(ph)T(ph)ECSHKQSLAER_
_LHY(ph)CVS(ph)CAIHSK_
_NQFLKM(ox)T(ph)T(ph)FNNK_
_PDLSKT(ph)T(ph)GK_
_QEVEFT(ph)IT(ph)DM(ox)K_
_QLEYNARNAY(ph)T(ph)EK_
_QYM(ox)RRS(ph)TCTINY(ph)SK_
_RDS(ph)Y(ph)EK_
_SGS(ph)VVVT(ph)YEVK_
_SLKCCRT(ph)IQPCGS(ph)IID_
_SNLIS(ph)GSVM(ox)Y(ph)IEEKTK_
_YQAS(ph)LVT(ph)HGKRMR_
_Y(ph)T(ph)ITSR_
_AADKS(ph)PESQNLIDGTK_
_AAESETPGKS(ph)PEK_
_AAGISLIVPGKS(ph)PTR_
_AAGM(ox)SS(ph)PGAQSHPEELPR_
_AAPEAS(ph)SPPASPLQHLLPGK_
_AAS(ph)PPSYTLDLGESQLAPPPSK_
_AEAPLPS(ph)PK_
_AEGLEEADTGASGCHSHPEEQPTS(ph)ISPSR_
_AEGLEEADTGASGCHSHPEEQPTSIS(ph)PSR_
_AEGVST(ph)PLAGR_
_AET(ph)PTESVSEPEVATK_
_AFAAVPTSHPPEDAPAQPPTPGPAAS(ph)PEQLSFR_
_AGGSAALS(ph)PSKK_
_AGLESGAEPGDGDS(ph)DTTK_
_AGLGS(ph)PERPPK_
_AGS(ph)FTGTSDPEAAPAR_
_AGS(ph)LQLSSM(ox)SAGNSSLR_
_AGS(ph)LQLSSMSAGNSSLR_
_AHS(ph)PASLSFASYR_
_AITSLLGGGS(ph)PK_
_ANS(ph)PEKPPEAGAAHKPR_
_ANTTAFLT(ph)PLEIK_
_APLQSAVVTNAVS(ph)PAELTPK_
_APSHM(ox)SSSHS(ph)FPQLAR_
_APS(ph)LTNDEVEEFR_
_AQGEPVAGHES(ph)PK_
_AQLEPVAS(ph)PAK_
_AQSLVISPPAPS(ph)PR_
_AQS(ph)SPASATFPVSVQEPPTKPR_
_ARS(ph)PSVAAMASPQLCR_
_ARS(ph)PTDDKVK_
_ASEDT(ph)TSGSPPK_
_ASEDTTSGS(ph)PPKK_
_ASIGQS(ph)PGLPSTTFK_
_ASLGSLEGEAEAEASS(ph)PK_
_ASPVTSPAAAFPTAS(ph)PANK_
_ASSTST(ph)PEPTR_
_AST(ph)PVLK_
_AVAGVM(ox)ITAS(ph)HNR_
_AVAGVMITAS(ph)HNR_
_AVT(ph)PSSEAK_
_AVT(ph)PVPTK_
_AVT(ph)PVSQGSNSSSADPK_
_AVTTVTQSTPVPGPSVPPPEELQVS(ph)PGPR_
_DEILPTT(ph)PISEQK_
_DGKFS(ph)PIQEK_
_DHNIPQES(ph)PKPVK_
_DINTFLGT(ph)PVQK_
_DKAPVQPQQS(ph)PAAAPGGTDEKPSGK_
_DKPTYDEIFYTLS(ph)PVNGK_
_DLLAEQQPHHLATAVPLT(ph)PR_
_DPAQPMS(ph)PGEATQSGAR_
_DPQT(ph)PVLQTK_
_DSAPSTPTS(ph)PTEFLTPGLR_
_DYDDMS(ph)PR_
_DYEIESQNPLAS(ph)PTNTLLGSAK_
_DYEIESQNPLASPTNT(ph)LLGSAK_
_EAEALLQSM(ox)GLTPESPIVPPPM(ox)S(ph)PSSK_
_EAEALLQSMGLTPESPIVPPPM(ox)S(ph)PSSK_
_EDEIS(ph)PPPPNPVVK_
_EDVEVAES(ph)PLR_
_EEPVSS(ph)GPEEAVGK_
_EGEEPTVYS(ph)DEEEPKDESAR_
_EGS(ph)PIPHDPEFGSK_
_EGSVLDILKS(ph)PGFASPK_
_EIIDASDKEGMS(ph)PAKR_
_ELESPLT(ph)PGK_
_EMEHNTVCAAGTS(ph)PVGEIGEEK_
_ENAS(ph)PAPGTTAEEAM(ox)SR_
_ENLPS(ph)HFK_
_ENPEDVLS(ph)PTSVATYLSSK_
_EPVAES(ph)PKK_
_ETQS(ph)PEQVK_
_EVQAEQPSSSS(ph)PR_
_FCLSS(ph)PTEALK_
_FHS(ph)PSTTWSPNK_
_FSGFSAKPNNSGEAPS(ph)SPTPK_
_FVSRPPT(ph)PK_
_GGVTGSPEASISGS(ph)K_
_GGVTGS(ph)PEASISGSK_
_GHTDTEGRPPS(ph)PPPTSTPEK_
_GLPFYAGLS(ph)PAGK_
_GMGS(ph)LDMADK_
_GNIETTSEDGQVFS(ph)PK_
_GPAGEAGAS(ph)PPVR_
_GTDDLNPVTSTPAKPSS(ph)PPPEFSFNTPGK_
_GTDTQTPAVLS(ph)PSKTQATLKPK_
_GVLHTFS(ph)PSPK_
_GVS(ph)PSQAQGLGSNLVTEVR_
_GVS(ph)QEKEAQISSAIVSSVQSK_
_HELS(ph)PPQKR_
_HGSGPNIILTGDS(ph)SPGFSK_
_HGS(ph)VSADEAAR_
_HIKEEPLSEEEPCTSTAIAS(ph)PEK_
_HIKEEPLS(ph)EEEPCTSTAIASPEK_
_HLS(ph)PYATLTVGDSSHK_
_HPS(ph)HSTTPSGPGDEVAR_
_HTGPNS(ph)PDTANDGFVR_
_IDASKNEEDEGHSNS(ph)SPR_
_IFSLSGT(ph)LETVR_
_IFVGGLS(ph)PDTPEEK_
_IGGIGT(ph)VPVGR_
_ILATPPQEDAPS(ph)VDIANIR_
_IMNTFS(ph)VVPSPK_
_IPM(ox)TPTSSFVSPPPPT(ph)ASPHSNR_
_IPNYQLS(ph)PTKLPSINK_
_IS(ph)MSEVDLNVAAPK_
_IVS(ph)PGLTIHER_
_IYQY(ph)IQSR_
_KAALSS(ph)PR_
_KAAS(ph)EELLEK_
_KAAS(ph)PSPQSVR_
_KAEGEPQEES(ph)PLK_
_KAEGEPQEES(ph)PLKSK_
_KAPT(ph)PQEK_
_KAS(ph)PEPEGEAAGK_
_KDGSS(ph)PPLLEK_
_KEEPSQNDIS(ph)PK_
_KEES(ph)PPPPK_
_KEETPGT(ph)PK_
_KEHIPGT(ph)LR_
_KES(ph)APPSLR_
_KETQS(ph)PEQVK_
_KFLQPGS(ph)PR_
_KFS(ph)PSQVPVQTR_
_KGAAPT(ph)PPGK_
_KKEEPSQNDIS(ph)PK_
_KKEPAITSQNS(ph)PEAR_
_KLEST(ph)ESR_
_KLPFPLS(ph)PS_
_KLS(ph)VLGK_
_KPS(ph)EDEVLNK_
_KPS(ph)VSEEVQATPNK_
_KQS(ph)LGELIGTLNAAK_
_KTVS(ph)EPNLK_
_LAS(ph)PMKPVPGTPPSSK_
_LCDFGSASHVADNDITPY(ph)LVSR_
_LDLLGNLPGS(ph)KR_
_LDNTPAS(ph)PPR_
_LDSQPQETS(ph)PELPR_
_LDT(ph)PDINIVLK_
_LESESTS(ph)PSLEM(ox)K_
_LESEST(ph)SPSLEMK_
_LFGGFNSSDTVTS(ph)PQR_
_LFIHSNIY(ph)_
_LGAGEGGEASVS(ph)PEKTSTTSK_
_LITPPPPPPS(ph)PER_
_LLEVQPQVANS(ph)PSSAAQK_
_LLIEY(ph)GAR_
_LLQQCET(ph)LK_
_LLQS(ph)PLCAGCSSDK_
_LNAT(ph)ASLEQER_
_LNFDM(ox)TAS(ph)PK_
_LNQPGT(ph)PTR_
_LPLVPES(ph)PRR_
_LPS(ph)SETHPEESM(ox)YK_
_LPS(ph)SETHPEESMYK_
_LRLSPS(ph)PTSQR_
_LRLS(ph)PSPTSQR_
_LSM(ox)PQSAAVS(ph)TTPPHNR_
_LSPFHGSSPPQSTPLS(ph)PPPLTPK_
_LSSPAAFLPACNS(ph)PSK_
_LTFDSSFS(ph)PNTGK_
_LTPSPDIIVLSDNEASS(ph)PR_
_LTSPVTSIS(ph)PIQASEK_
_LYGS(ph)PTQIGPSYR_
_M(ox)ALPPQEDAT(ph)ASPPR_
_M(ox)ETEADAPS(ph)PAPSLGER_
_M(ox)IS(ph)FLYWK_
_M(ox)PIVGLGTWKS(ph)PLGK_
_MPIVGLGTWKS(ph)PLGK_
_NAS(ph)ASFQELEDKK_
_NCPPS(ph)PLPLISK_
_NEEENIYS(ph)VPHDSTQGK_
_NHSDSSTSESEVSSVS(ph)PLK_
_NLNLVSST(ph)ASIK_
_NLS(ph)PGAVESDVR_
_NLS(ph)STTDDEAPR_
_NSSTETDQQPHS(ph)PDSSSSVHSIR_
_NTDVAQS(ph)PEAPK_
_NTEESS(ph)SPVRK_
_NTGVSPASRPSPGTPTS(ph)PSNLTSGLK_
_NTSLPPLWS(ph)PEAER_
_NTVS(ph)QSISGDPEIDKK_
_NVIPDT(ph)PPSTPLVPSR_
_PCS(ph)EETPAISPSKR_
_PLKPLS(ph)PLR_
_PQY(ph)DIWGK_
_PSPGTPTSPSNLT(ph)SGLK_
_PVVDGEEGEPHS(ph)ISPR_
_PVVDGEEGEPHSIS(ph)PR_
_QEKPAEKPAETPVATS(ph)PTATDSTSGDSSR_
_QEQLS(ph)PK_
_QIDS(ph)SPVGGETDETTVSQNYR_
_QLEEPGAGTPS(ph)PVR_
_QLS(ph)SGVSEIR_
_QLT(ph)LPEEDK_
_QPAQSQNLS(ph)PLSGFSR_
_QPT(ph)PPFFGR_
_QY(ph)ENFINR_
_RAS(ph)FAK_
_RAS(ph)ISEPSDTDPEPR_
_RAS(ph)LEER_
_RAS(ph)LSEIGFGK_
_RAS(ph)QEANLLTLAQK_
_RDS(ph)FDDR_
_REVS(ph)PAPAVAGQSK_
_RFT(ph)DEESR_
_RFT(ph)PPSTALSPGK_
_RGNDPLTSS(ph)PGR_
_RGS(ph)GVFCANCLTTK_
_RIDIS(ph)PSTFR_
_RKPS(ph)TPLSEVIVK_
_RLEIS(ph)PDSSPER_
_RLS(ph)GEER_
_RLSNVS(ph)LPGPGLSVPR_
_RNS(ph)FSENEK_
_RNS(ph)FTPLSSSNTIR_
_RNS(ph)LTGEEGQLAR_
_RPASVSSS(ph)AAVEHEQR_
_RPAS(ph)VSSSAAVEHEQR_
_RPEGPGAQAPSS(ph)PR_
_RPEGPGAQAPS(ph)SPR_
_RPES(ph)APAESSPSK_
_RPS(ph)DSGPPAER_
_RQS(ph)SGSATNVASTPDNR_
_RRS(ph)PPPGPDGHAK_
_RS(ph)CFESSPDPELK_
_RSDS(ph)VSASER_
_RSS(ph)RDMAGGAGPR_
_RTPHVQAVQGPLGS(ph)PPK_
_RTPS(ph)EAER_
_RTS(ph)IHDFLTK_
_RTS(ph)SEELR_
_SADVS(ph)PTTEGVK_
_S(ph)AGALEEGTSEGQLCGR_
_SAS(ph)SDTSEELNSQDSPPK_
_SCTPS(ph)PDQISHR_
_SDEGQLS(ph)PATR_
_SDPES(ph)PIKK_
_SEAGHASS(ph)PDSEVTSLCQK_
_SEETLLT(ph)PER_
_SEGS(ph)PVLPHEPAK_
_SEPHS(ph)PGIPEIFR_
_SFS(ph)ADNFIGIQR_
_SFS(ph)LASSSNSPISQR_
_S(ph)FTAADSKDEEVK_
_SGGIVIS(ph)PFRLEELTNR_
_SGS(ph)YSYLEER_
_SINHQIES(ph)PSER_
_SLGNILQAKPTS(ph)SPAKGPPQK_
_SLS(ph)SPTVTLSAPLEGAK_
_S(ph)LSSSLQAPVVSTVGM(ox)QR_
_S(ph)LTNSHLEK_
_SLTSLPCY(ph)QHFR_
_S(ph)NSLVSTFTMEK_
_SNT(ph)PILVDGK_
_S(ph)PGNTSQPPAFFSK_
_SPGSTPTT(ph)PTSSQAPQK_
_S(ph)PSDSSTASTPVAEQIER_
_SPSGPVKS(ph)PPLSPVGTTPVK_
_SPVS(ph)PLAAQGIPLPAQLTK_
_SQS(ph)SDTEQQSPTSGGGK_
_SSEPVKETVQTTQS(ph)PTPVEK_
_S(ph)SGPTSLFAVTVAPPGAR_
_SSMS(ph)GLHLVK_
_SS(ph)PAAFINPPIGTVTPALK_
_S(ph)SSPAPADIAQTVQEDLR_
_S(ph)SSPVQVEEEPVR_
_SSSSSSQPEHSAM(ox)LVSTAAS(ph)PSLIK_
_SSSSSSQPEHSAMLVSTAAS(ph)PSLIK_
_SST(ph)PEEVKK_
_STDSEVSQS(ph)PAK_
_STFREES(ph)PLR_
_STS(ph)TPNVHM(ox)VSTTLPVDSR_
_STS(ph)TPNVHMVSTTLPVDSR_
_SVS(ph)PSPVPLLFQPDQNAPPIR_
_SVS(ph)PTTEM(ox)VSNESVDYR_
_SVS(ph)VDSGEQR_
_S(ph)VVGTPAYLAPEVLLNQGYNR_
_TAADVVS(ph)PGANSVDSR_
_TADGRVS(ph)PAGGTLDDKPK_
_TAESQT(ph)PTPSATSFFSGK_
_TAS(ph)NPKVENEDEPVR_
_TAS(ph)PPPPPKR_
_TAS(ph)QEGCQELTQEQR_
_TCS(ph)FGGFDLTNR_
_TEAQDLCRAS(ph)PEPPGPESSSR_
_TEIM(ox)S(ph)PLYQDEAPK_
_T(ph)ESVPSDINNPVDR_
_TGNESGSNLS(ph)DSGSVK_
_TGS(ph)ESSQTGTSTTSSR_
_TLHS(ph)PPLQLQQR_
_TLMNAVS(ph)PLK_
_TLSSPSLQT(ph)DGIAATPVPPPPPPK_
_TPAPPEPGS(ph)PAPGEGPSGR_
_TPS(ph)IQPSLLPHAAPFAK_
_TPT(ph)PEPAEVETR_
_TQLWASEPGT(ph)PPLPTSLPSQNPILK_
_TQTPPVS(ph)PAPQPTEER_
_TQT(ph)PPVSPAPQPTEER_
_TSQVGAASAPAKES(ph)PR_
_T(ph)SSFTEQLDEGTPNR_
_T(ph)SSIADEGTYTLDSILR_
_T(ph)SVQTEDDQLIAGQSAR_
_TTFS(ph)PPVVAATVK_
_TVFPGAVPVLPAS(ph)PPPK_
_TVFPGAVPVLPAS(ph)PPPKDSLR_
_T(ph)YSAPAINAIQGGSFESPK_
_VATLNS(ph)EEESDPPTYK_
_VDLT(ph)LLSPK_
_VDS(ph)TTCLFPVEEK_
_VHVQFFDDS(ph)PTR_
_VISRPPPSVS(ph)PPK_
_VLHSSNPVPLYAPNLS(ph)PPADSR_
_VLPITVPKS(ph)PAFALK_
_VLS(ph)PPKLNEVSSDANR_
_VPAPFS(ph)PPPSKPR_
_VPLAPITDPQQLQLS(ph)PLK_
_VPLS(ph)PLPGPK_
_VPS(ph)EGAYDIILPR_
_VPS(ph)PGMEEAGCSR_
_VQDT(ph)SNTGLGEDIIHQLSK_
_VQEAES(ph)PVFK_
_VQEKPDS(ph)PGGSTQIQR_
_VSDS(ph)PSHIATK_
_VSSPLPS(ph)PSAMTDAANSQAAAK_
_VVS(ph)STSEEEEAFTEK_
_WDQTADQTPGAT(ph)PK_
_WLKS(ph)PTTPIDPEK_
_YKVPQLEIVPNS(ph)AEER_
_YLQDQLS(ph)PLTR_
_YPIY(ph)PLTPK_
_YRLS(ph)PTLSSTK_
_YTGEEDGAGGHS(ph)PAPPQTEECLR_
_AAPSTAPAEAT(ph)PPKPGEAEAPPK_
_AASAPAKES(ph)PR_
_AAS(ph)TDLGAGETVVGK_
_ADEASELACPT(ph)PK_
_ADLNQGIGEPQS(ph)PSR_
_AEAS(ph)SPVPYLSPETNPASSTSAVNHNVNLTNVR_
_AEDGATPSPSNET(ph)PKKK_
_AEDMYSAQSHQAAT(ph)PPKDGK_
_AEIHAQPS(ph)DKER_
_AEPSEVDM(ox)NS(ph)PK_
_AEPSEVDMNS(ph)PK_
_AES(ph)LDDQM(ox)LSR_
_AGDLLEDS(ph)PKRPK_
_AGDPGEM(ox)PQS(ph)PTGLGQPK_
_AGEPNSPDAEEANS(ph)PDVTAGCDPAGVHPPR_
_AGGS(ph)PASYHGSTSPR_
_AGPSAQEPGS(ph)QTPLK_
_AHT(ph)PLNTPDPSTK_
_AIGSTSKPQES(ph)PK_
_AKTQT(ph)PPVSPAPQPTEER_
_ALASEKS(ph)PTADAKPAPK_
_AM(ox)ADELS(ph)EKQVYDAHTK_
_AM(ox)STTSIS(ph)SPQPGK_
_AMVDSQQKS(ph)PVK_
_ANEAGGQVGPEAPRPPET(ph)SPEM(ox)R_
_ANEAGGQVGPEAPRPPET(ph)SPEMR_
_ANS(ph)DTDLVTSESR_
_ANS(ph)FVGTAQYVSPELLTEK_
_APEPDLM(ox)S(ph)PTR_
_APFHT(ph)PPEEPNECDFK_
_APQTSSS(ph)PPPVR_
_APVQPQQS(ph)PAAAPGGTDEKPSGK_
_AQNEFKDEAQSLS(ph)HSPK_
_AQT(ph)PHEDGGPQPHR_
_ASGLLKS(ph)PASLK_
_ASQPDLVDT(ph)PTSSKPQPK_
_ASS(ph)PIKQSHEPVPDTSVEK_
_AS(ph)SPSEHGPR_
_ATAPQTQHVS(ph)PM(ox)R_
_ATEVSKT(ph)PEAR_
_ATGAALT(ph)PTEER_
_ATPELGSSENSAS(ph)SPPR_
_AT(ph)SAVVITSTSGDSIVSTSMPR_
_AVLSDS(ph)PQLSEGK_
_AVT(ph)PNQVR_
_AYS(ph)PEYRR_
_DANIKS(ph)PTAQAAPR_
_DDGVFVQEVTQNS(ph)PAAR_
_DFQEYVEPGEDFPAS(ph)PQR_
_DKS(ph)PVREPIDNLTPEER_
_DLM(ox)NSEVICS(ph)VK_
_DMYDKEY(ph)YSVHNK_
_DPS(ph)ASPGDAGEQAIR_
_DSALAEAPEGLS(ph)PAPPAR_
_DTGKT(ph)PVEPEVAIHR_
_DVYLS(ph)PRDDGYSTK_
_DYTGCSTSESLS(ph)PVK_
_EDLSPAFDHS(ph)PNK_
_EELM(ox)S(ph)SDLEETAGSTSIPK_
_EELMSS(ph)DLEETAGSTSIPK_
_EERS(ph)PQTLAPVGEDAM(ox)K_
_EESREPAPAS(ph)PAPAGVEIR_
_EGPEPPEEVPPPTT(ph)PPVPK_
_EGPEPPEEVPPPT(ph)TPPVPK_
_EKT(ph)PELPEPSVK_
_EKVIET(ph)PENDFK_
_ELEEVSPET(ph)PVVPATTQR_
_ELPPS(ph)PEKK_
_ENIKPNETS(ph)PSFSK_
_ENS(ph)REALAEAALESPR_
_EPEPAAGPQAEESATVSAPAPM(ox)S(ph)PTR_
_ERGT(ph)PPVDPK_
_ESEPAPAS(ph)VTALTDAR_
_ESSIIAPAPAEDVDT(ph)PPR_
_ESTHQSEDVFLPS(ph)PR_
_ESTQLS(ph)PADLTEGKPTDPSK_
_ETDPVKS(ph)PPLPEHQK_
_ET(ph)RISFVEEDVHPK_
_ET(ph)SPESSLIQDEIAVK_
_ETTSGTSTEPVKNSS(ph)PAPPQPAPGK_
_ETVQT(ph)TQSPTPVEK_
_EVESRLS(ph)PGESAYQK_
_EVES(ph)RLSPGESAYQK_
_EWNGVVSESDS(ph)PVK_
_EYLPEGDFS(ph)IMTEM(ox)LK_
_FGEYNSNM(ox)S(ph)PEEK_
_FICVTPTTCSNTIDLPM(ox)S(ph)PR_
_FNGGHS(ph)PTHSPEK_
_FSGFSAKPNNSGEAPSS(ph)PTPK_
_GALHT(ph)VSHEDIR_
_GDGGSTTGLSAT(ph)PPASLPGSLTNVK_
_GDHPLT(ph)PGSHYA_
_GDS(ph)LKEPTSIAESSR_
_GEAAPGPAPPAPEAT(ph)PPPASAAGK_
_GEPAAAAAPEAGAS(ph)PVEK_
_GGDSIGET(ph)PTPGASK_
_GGPGSAVS(ph)PYPTFNPSSDVAALHK_
_GKGGVTGS(ph)PEASISGSK_
_GKT(ph)LVQK_
_GLPPS(ph)MER_
_GM(ox)YDGPVFDLTTT(ph)PK_
_GMYDGPVFDLTTT(ph)PK_
_GNIETTSEDGQVFS(ph)PKK_
_GPAADPSS(ph)PGTSGVGPAAGAGDSR_
_GPAADPS(ph)SPGTSGVGPAAGAGDSR_
_GPAGEAGAS(ph)PPVRR_
_GPTSTSIDNIDGT(ph)PVRDER_
_GQEVET(ph)SVTYYR_
_GTDTQTPAVLS(ph)PSK_
_HASSSPES(ph)PKPAPAPGSHR_
_HGLAHDEMKS(ph)PR_
_HLSTPSSVS(ph)PEPQDSAK_
_HSS(ph)NPPLESHVGWVM(ox)DSR_
_HTDDEM(ox)TGY(ph)VATR_
_HTDDEMT(ph)GYVATR_
_HTS(ph)CSSAGNDSKPVQEAPSVAR_
_HYEDGYPGGSDNYGS(ph)LSR_
_IDIS(ph)PSTFRK_
_IDTHPS(ph)PSHSSTVK_
_IDT(ph)PPACTEESIATPSEIK_
_IES(ph)PKLER_
_IEVKEES(ph)PQSK_
_IGFPST(ph)SPAK_
_IGQQVDREPGDVAT(ph)PPR_
_IHRAS(ph)DPGLPAEEPK_
_IM(ox)VGS(ph)TDDPSVFSLPDSK_
_IPCKS(ph)SPELEDTATSSK_
_IPSKEEEADM(ox)S(ph)SPTQR_
_IQS(ph)IKEEKEDITYR_
_ISM(ox)PDLDLHLKS(ph)PK_
_ISM(ox)QDVDLSLGS(ph)PK_
_ISSKS(ph)PGHM(ox)VILDQTK_
_ISSKS(ph)PGHMVILDQTK_
_IWDPTPSHT(ph)PAGAATPGR_
_KAAS(ph)LTEDRDR_
_KADTTTPTPTAILAPGS(ph)PASPPGSLEPK_
_KAQVS(ph)PQS_
_KAS(ph)ENVEYTLR_
_KAS(ph)PEAASTPR_
_KDNEESEQPPVPGT(ph)PTLR_
_KEFEISNLQS(ph)K_
_KELS(ph)PAGSISK_
_KEQTLQGAEEDEDLEGPPSYKPPT(ph)PK_
_KES(ph)APQVLLPEEEK_
_KEVS(ph)PEVVR_
_KFSGFSAKPNNSGEAPSS(ph)PTPK_
_KGS(ph)LSNLM(ox)DFVK_
_KGS(ph)VSHDTVQPR_
_KGT(ph)FTDDLHK_
_KIS(ph)GTTALQEALK_
_KKASLTS(ph)K_
_KKS(ph)IPLSIK_
_KKS(ph)PIINESR_
_KLAT(ph)PPAAQESSR_
_KLES(ph)FYIQK_
_KLS(ph)SSDAPAQDTGSSAAAVETDASR_
_KLT(ph)PSAGK_
_KPIKS(ph)PSK_
_KPNAGGS(ph)PAPVR_
_KPPT(ph)PPEKPQR_
_KPS(ph)DGSPDTKPSR_
_KPS(ph)VPDSASPADDSFVDPGER_
_KQAS(ph)FLEAEGGAK_
_KQPPKEPSEVPT(ph)PK_
_KSS(ph)GTGTEPVAK_
_KVAGAAT(ph)PKK_
_KVEAPETNIDKT(ph)PK_
_KVEDVPS(ph)R_
_KVLCS(ph)TGGK_
_KVPS(ph)FTFTPTVTYQR_
_KYS(ph)ASSGGLCEEATAAK_
_LADSGDGAGPS(ph)PEEKDFLK_
_LDGLVET(ph)PTGYIESLPR_
_LDNVPHT(ph)PSSYIETLPK_
_LDSQEPGRQT(ph)PDR_
_LEPSTSTDQPVT(ph)PEPTSQATR_
_LGAGEGGEASVS(ph)PEK_
_LGAGGGSPEKS(ph)PSAQELK_
_LGAGGGS(ph)PEKSPSAQELK_
_LIS(ph)DSVER_
_LKS(ph)EDGVEGDLGETQSR_
_LLDTM(ox)VDT(ph)FLQK_
_LNHS(ph)PPQSSSR_
_LPTTDGAHPQPIS(ph)PIPGGVSSSGLSR_
_LQINS(ph)PPFDQPM(ox)SR_
_LRLT(ph)PQHDQIQTQPLGK_
_LSGNTHYTPLCAPTS(ph)PNK_
_LSM(ox)EDS(ph)KSPPPK_
_LSM(ox)EDSKS(ph)PPPK_
_LSMEDSKS(ph)PPPK_
_LSS(ph)ATANALYSSNLRDDTK_
_M(ox)ALPPQEDATAS(ph)PPR_
_M(ox)ETVSNASSSSNPSS(ph)PGR_
_METVSNASS(ph)SSNPSSPGR_
_MSFSS(ph)LKR_
_NDSVIVADQTPT(ph)PTR_
_NFTKPQDGDVIAPLIT(ph)PQKK_
_NGVAAEVS(ph)PAKEENPR_
_NKQDDDLNCEPLS(ph)PHNITPEPVSK_
_NM(ox)APGAVCS(ph)PGESK_
_NQKPSQVNGAPGS(ph)PTEPAGQK_
_NQS(ph)PTEAEKPASSSLPSSPPPQLLTR_
_NSPLDCGSAS(ph)PNK_
_NSPVTKT(ph)PPR_
_NSSTPGLQVPVSPT(ph)VPIQNQK_
_NTGVSPASRPSPGTPT(ph)SPSNLTSGLK_
_NTPSQHSHSIQHS(ph)PER_
_NTPSQHSHS(ph)IQHSPER_
_NVSSFPDDATS(ph)PLQENR_
_NWSTSWIVLSS(ph)RR_
_PAEKPAETPVATS(ph)PTATDSTSGDSSR_
_PCSEETPAIS(ph)PSKR_
_PSDSVSSTPAATST(ph)PSK_
_PSM(ox)S(ph)PTPLDR_
_PVSSAASVYAGAGGS(ph)GSR_
_QACTAQT(ph)PEPLR_
_QASTDAGTAGALT(ph)PQHVR_
_QENKRPS(ph)PR_
_QEQINTEPLEDTVLS(ph)PTK_
_QERLS(ph)PEVAPPAHR_
_QQQKELELAVDET(ph)KK_
_QQQLEEEAAKPPEPEKPVS(ph)PPPVEQK_
_QVAGDAPVEQAT(ph)AETASPVHR_
_RAEDGSVIDY(ph)ELIDQDAR_
_RAEDGS(ph)VIDYELIDQDAR_
_RAS(ph)PSKPASAPASR_
_RDS(ph)PTYDPYKR_
_RDS(ph)QDGSSYR_
_REDS(ph)PGPEVQPMDK_
_RES(ph)PSPAPK_
_RFS(ph)DSEGEETVPEPR_
_RGAT(ph)PPAPPR_
_RGEGDAPFSEPGTTSTQRPS(ph)SPETATK_
_RGGIPAS(ph)PIDPFQSR_
_RGNDPLTS(ph)SPGR_
_RGS(ph)LEMSSDGEPLSR_
_RGS(ph)LSNAGDPEIVK_
_RKPS(ph)VPDSASPADDSFVDPGER_
_RLS(ph)EQLAHTPTAFK_
_RLS(ph)LGQGDSTEAATEER_
_RLSPPSS(ph)SAASSYSFSDLNSTR_
_RLT(ph)VSSLQESGLK_
_RNS(ph)LDGGGR_
_RNS(ph)LGGDVLFVGK_
_RPAS(ph)LSTAPSEK_
_RPGS(ph)VSSTDQER_
_RPMSS(ph)PEM(ox)K_
_RPMS(ph)SPEMK_
_RPNTS(ph)PDR_
_RPPS(ph)PEPSTK_
_RPSAPCS(ph)QDR_
_RPS(ph)SSEIITEGK_
_RQEMESGITT(ph)PPK_
_RQS(ph)LELQK_
_RRPS(ph)PQPSPR_
_RRSPS(ph)LSSK_
_RSEACPCQPDSGS(ph)PLPAEEEK_
_RSILGT(ph)PLSK_
_RS(ph)SDGSLSHEEDLAK_
_RSS(ph)LPLDHGSPAQENPESEK_
_RS(ph)STVAPAQPDGAESEWTDVETR_
_RTDALTS(ph)SPGR_
_RT(ph)DFLQFQNLR_
_RTPAPPEPGS(ph)PAPGEGPSGR_
_RT(ph)STPVIMEGVQEETDTR_
_RVS(ph)ISEGDDKIEYR_
_SAESPTS(ph)PVTSETGSTFK_
_SAKS(ph)EESLTSLHAVDGDSK_
_SAMDSPVPASMFAPEPS(ph)SPGAAR_
_SASQS(ph)SLDKLDQELK_
_SEDPPTT(ph)PIR_
_SELNEIKENQRS(ph)PVR_
_SES(ph)PKEPEQLR_
_SETAPAAPAAPAPAEKT(ph)PVK_
_SET(ph)PPHWR_
_S(ph)FEVEEVETPNSTPPR_
_SGAQASSTPLS(ph)PTR_
_SGM(ox)NS(ph)PLR_
_SGSLDSELSVS(ph)PK_
_S(ph)GSM(ox)DPSGAHPSVR_
_SHVEDGDIAGAPASS(ph)PEAPPAEQDPVQLK_
_SKS(ph)MDLGIADETK_
_SKS(ph)VKEDSNLTLQEK_
_SKT(ph)EEDILR_
_S(ph)LGEQDQM(ox)TLRPPEK_
_S(ph)LSEQPVMDTATATEQAK_
_SLS(ph)PGKENVSALDM(ox)EK_
_SLS(ph)PQEDALTGSR_
_SLSSPT(ph)VTLSAPLEGAK_
_SLS(ph)SSLDDTEVKK_
_S(ph)LVGTPYWM(ox)APELISR_
_SMDAM(ox)SS(ph)PTKTETVK_
_SM(ox)DAMSS(ph)PTKTETVK_
_SMDAMSS(ph)PTKTETVK_
_SMS(ph)APGNLLVK_
_S(ph)NSEVEDVGPTSHNR_
_S(ph)NSLVSTFTM(ox)EK_
_S(ph)NSSSEAVLGQEELSAQAK_
_SPGST(ph)PTTPTSSQAPQK_
_SPS(ph)PAHLPDDPKVAEK_
_S(ph)QEADVQDWEFR_
_SQSAAVTPSSTT(ph)SSTR_
_SQT(ph)PERPAK_
_SRS(ph)DIDVNAAAGAK_
_SRTS(ph)VQTEDDQLIAGQSAR_
_SSATIQNET(ph)PK_
_S(ph)SSEDAESLAPR_
_SSS(ph)SLLASPGHISVK_
_SSTVATLQGT(ph)PDHGDPR_
_STELVLS(ph)PDM(ox)PR_
_STLESEKPGS(ph)PEAAETSPPSNIIDHCEK_
_STSAPQM(ox)S(ph)PGSSDNQSSSPQPAQQK_
_STSAPQMS(ph)PGSSDNQSSSPQPAQQK_
_S(ph)TSATDTHHVEM(ox)AR_
_S(ph)TSATDTHHVEMAR_
_ST(ph)SMDSGSSESPASLKR_
_S(ph)VENLPECGITHEQR_
_SVSPTTEM(ox)VS(ph)NESVDYR_
_SVSPTTEMVS(ph)NESVDYR_
_SVS(ph)PTTEMVSNESVDYR_
_SVT(ph)PPPPPR_
_SYS(ph)PDGKESPSDKK_
_TAPTSTIAPGVVM(ox)AS(ph)SPALPTQPAEEAAR_
_TAPVASTPSSTPIPALS(ph)PPTKVPEPNENVGDAVQTK_
_TCPVHESPSGIDTSET(ph)SPK_
_TDSREDEIS(ph)PPPPNPVVK_
_TELGSQT(ph)PESSR_
_TFWS(ph)PELKK_
_THSAGTS(ph)PTITHQK_
_THS(ph)LSNADGQYDPYTDSR_
_TKPIVKPQT(ph)SPEYGQGINPISR_
_TKPTQAAGPS(ph)SPQKPPTPEETK_
_TKS(ph)PTDDEVTPSAVVR_
_TKSPT(ph)DDEVTPSAVVR_
_TKS(ph)SSEEVLER_
_TLNM(ox)TTS(ph)PEEK_
_TLS(ph)DESIYNSQR_
_TLS(ph)PTPSAEGYQDVR_
_TLS(ph)SSAQEDIIR_
_TNKS(ph)PEAKPLPGK_
_TPESQPDTPPGT(ph)PLVSQDEK_
_TPESQPDT(ph)PPGTPLVSQDEK_
_TPESQPDT(ph)PPGTPLVSQDEKR_
_TPT(ph)PEPAEVETRK_
_TPTPSTPGDTQPNT(ph)PAPVPPAEDGIK_
_TQM(ox)AEVLPS(ph)PR_
_TQPDGT(ph)SVPGEPASPISQR_
_TQT(ph)PPLGQTPQLGLK_
_TRLS(ph)TASEETVQNR_
_TRLSTAS(ph)EETVQNR_
_TRPGS(ph)FQSLSDALSDTPAK_
_T(ph)SPDPSPVSAAPSK_
_TSSLAPVVGTTTTTPS(ph)PSAIK_
_TSSVSNPQDSVGS(ph)PCSR_
_TVDM(ox)ES(ph)TEVFTKK_
_TVEVAEGEAVRT(ph)PQSVTAK_
_TVEVAEGEAVRTPQSVT(ph)AK_
_T(ph)WTLCGTPEYLAPEIILSK_
_TWTLCGT(ph)PEYLAPEIILSK_
_TYS(ph)APAINAIQGGSFESPK_
_TYSSS(ph)LKR_
_VALS(ph)DDETKETENM(ox)R_
_VEQATKPS(ph)FESGR_
_VEVT(ph)PTVPR_
_VGDST(ph)PVSEKPVSAAVDANASESP_
_VHT(ph)PHLDR_
_VIET(ph)PENDFK_
_VISRPPPS(ph)VSPPK_
_VKEEPPSPPQS(ph)PR_
_VKS(ph)PGSGHVK_
_VLGSEGEEEDEALS(ph)PAK_
_VLPSISLS(ph)PGPQPPK_
_VLS(ph)PTAAKPSPFEGK_
_VNHEPEPAGGAT(ph)PGATLPK_
_VNLEESSGVENS(ph)PAGARPK_
_VPKS(ph)PEHSAEPIR_
_VQAYEEPSVASS(ph)PNGK_
_VQMTS(ph)PSSTGSPM(ox)FK_
_VQM(ox)TS(ph)PSSTGSPMFK_
_VQMTS(ph)PSSTGSPMFK_
_VQTT(ph)PKVEEEQDLK_
_VSPKS(ph)PPTDQKK_
_VST(ph)PVVK_
_VSVTPPEESQNSDT(ph)PPRPDR_
_VTKNEEPS(ph)EEEIDAPKPK_
_VTNDIS(ph)PESSPGVGR_
_VVSS(ph)TSEEEEAFTEK_
_WTQLM(ox)PVGQFS(ph)LV_
_YGM(ox)GT(ph)SVER_
_Y(ph)MEFDLNNEGEIDLMSLK_
_YM(ox)NSDTT(ph)SPELR_
_YMNSDTTS(ph)PELR_
_YNLDAS(ph)EEEDSNKK_
_YSSSEVNHLS(ph)PR_
_AAGGAPS(ph)PPPPVR_
_AAGGIILT(ph)ASHCPGGPGGEFGVK_
_AAGGIILTAS(ph)HCPGGPGGEFGVK_
_AAHTEDINACTLTTS(ph)PR_
_AAPPPPALT(ph)PDSQTVDSSCK_
_AAS(ph)PPRPLLSNASATPVGR_
_AASVAAATTS(ph)PTPR_
_AAVGEEKDINTFVGT(ph)PVEK_
_AAVT(ph)PGKK_
_ACPGPPPPS(ph)PEPLAR_
_ADGAPSAAPPDGLLAS(ph)PDLGLLK_
_ADSEPES(ph)PLNASYVYK_
_AEEDEILNRS(ph)PR_
_AEEPAVGT(ph)SGLIFR_
_AEQS(ph)LHDLQER_
_AES(ph)PSPAPPPGLR_
_AEVLGHKT(ph)PEPAPR_
_AFS(ph)DPFVEAEK_
_AFS(ph)M(ox)DEPVAAK_
_AFSTVPLT(ph)PVPR_
_AGDLLEDS(ph)PK_
_AGDPGEMPQS(ph)PTGLGQPK_
_AGGPAT(ph)PLSPTR_
_AGGPTT(ph)PLSPTR_
_AGGPTTPLS(ph)PTR_
_AGGSPAPGPETPAIS(ph)PSKR_
_AGM(ox)SSNQSISSPVLDAVPRT(ph)PSR_
_AGM(ox)TSS(ph)PDATTGQTFG_
_AGMTSS(ph)PDATTGQTFG_
_AGSST(ph)PGDAPPAVAEVQGR_
_AGVAAPATQVAQVTLQS(ph)VQR_
_AHSSPAS(ph)LQLGAVSPGTLTPTGVVSGPAATPTAQHLR_
_AHTLLS(ph)PPSANNATFAR_
_AIGST(ph)SKPQESPKGK_
_AIPADS(ph)PTDQEPK_
_AITGAS(ph)LADIM(ox)AK_
_AKS(ph)LSAM(ox)DVEK_
_AKS(ph)LSAMDVEK_
_ALDY(ph)YMLR_
_ALPDSQQVPSS(ph)PASK_
_ALQAPHSPSKT(ph)DGK_
_ALS(ph)ASHTDLAH_
_ALS(ph)PAELR_
_AM(ox)S(ph)TTSISSPQPGK_
_AMVDSQQKS(ph)PVKR_
_APAGPSLEETSVSS(ph)PK_
_APAGQEEPGT(ph)PPSSPLSAEQLDR_
_APPGLTPAPAS(ph)PPVLPR_
_APS(ph)DSSLGTPSDGRPELR_
_APS(ph)PEPAAPR_
_APS(ph)PTAEQPPGGGDSAR_
_APS(ph)TSPSFEGTQETYTVAHEENVR_
_APS(ph)VATVGSICDLNLK_
_APVHFVEPLS(ph)PTGVAGHR_
_APVPGT(ph)PDSLSSGSSR_
_APVSSTESVIQSNT(ph)PTPPPSQPLNETAEEESR_
_AQLS(ph)PGIYDDTSAR_
_AQS(ph)TDSLGTSGSLQSK_
_ARPEY(ph)MLPVHFYGR_
_ASAPS(ph)PNAQVACDHCLK_
_ASEAASQAS(ph)PSAVTSKPR_
_ASEGLDACASPT(ph)K_
_ASGQAFELILS(ph)PR_
_AS(ph)PAPGSGHPEGPGAHLDM(ox)NSLDR_
_ASSHSSQTQGGGS(ph)VTK_
_ASTSDYQVISDRQT(ph)PK_
_ATAPQT(ph)QHVSPM(ox)R_
_ATAPQTQHVS(ph)PMR_
_ATSACAPISS(ph)PK_
_ATSAGS(ph)SPSCSLAGR_
_AT(ph)SPLCTSTASM(ox)VSSSPSTPSNIPQKPSQPAAK_
_AT(ph)SPLCTSTASMVSSSPSTPSNIPQKPSQPAAK_
_AT(ph)SPSSSVSGDFDDGHHSVSTPGPSR_
_ATT(ph)PQLTDVSEDLDQQSLPSEPEETLSR_
_ATVTPS(ph)PVK_
_ATVTPS(ph)PVKGK_
_AVAS(ph)PEATVSQTDENK_
_AVGM(ox)PSPVS(ph)PK_
_AVNTQALS(ph)GAGILR_
_AVPVES(ph)PVQKV_
_AVS(ph)PLDPSK_
_AVS(ph)PSSSEKR_
_AVT(ph)PPVKDDNEDVFSAR_
_AVT(ph)PVPTKTEEVSNLK_
_AYS(ph)FCGTVEYM(ox)APEVVNR_
_AYS(ph)FCGTVEYMAPEVVNR_
_AYT(ph)HQVVTR_
_CAPSAGS(ph)PAAAVGR_
_DAPTS(ph)PASVASSSSTPSSK_
_DASVPLIDVTNLPT(ph)PR_
_DATNRSPT(ph)QIVK_
_DELHIVEAEAM(ox)NYEGS(ph)PIK_
_DFQEYVEPGEDFPAS(ph)PQRR_
_DGSLASNPYS(ph)GDLTK_
_DHYQDPVPGIT(ph)PSSSSR_
_DIDISS(ph)PEFK_
_DIDNNLITST(ph)PR_
_DKPRS(ph)PFSK_
_DLS(ph)PTLIDNSAAK_
_DM(ox)DEPS(ph)PVPNVEEVTLPK_
_DMDEPS(ph)PVPNVEEVTLPK_
_DM(ox)NLTGCLES(ph)GGEGVGIGGPEEEK_
_DM(ox)QPLS(ph)PISVHER_
_DM(ox)S(ph)PLSETEM(ox)ALGK_
_DPAGCLNEGM(ox)APPT(ph)PPKNPEEEQK_
_DPAGCLNEGMAPPT(ph)PPKNPEEEQK_
_DPALCQHKPLT(ph)PQGDELSEPR_
_DPAQPM(ox)S(ph)PGEATQSGAR_
_DPT(ph)PIEFSPDPLPDNK_
_DQTAS(ph)APATPLVNK_
_DSSFTEVPRS(ph)PK_
_DSVSS(ph)VSDISQYR_
_DVNAAIAT(ph)IK_
_DVPPDILLDS(ph)PERK_
_DVVLSTS(ph)PK_
_EAEGGRPPAAT(ph)SPAEVVWSSEK_
_EAGLS(ph)QSHDDLSNATATPSVR_
_EATGLS(ph)PQAAQEK_
_EFANFT(ph)FPR_
_EFGSLPTT(ph)PSEQR_
_EFTGS(ph)PPSSATKK_
_EGPRDS(ph)ITLLDAK_
_EGSQGEPWT(ph)PTANLK_
_EGTSQLAS(ph)PLK_
_EGVNQPAAVVM(ox)EDS(ph)SPHEALR_
_EHSLQVS(ph)PSLEK_
_EIESS(ph)PQYR_
_EIPSATQS(ph)PISK_
_ELDEPGHQVST(ph)PPNEQKPVWEK_
_ELDPSLVSANDS(ph)PSGM(ox)QTR_
_ELFQT(ph)PGHTEEAVAAGK_
_ELKPM(ox)AS(ph)GASSA_
_ELSDQATAS(ph)PIVAR_
_ELSGGAEAGTVPTS(ph)PGKVPEDSLAR_
_EM(ox)PQDLRS(ph)PAR_
_EMPQDLRS(ph)PAR_
_ENQEPLRS(ph)PEVGDEEALRPLTK_
_EPAITSQNS(ph)PEAR_
_EPALPLEPDSGGNTS(ph)PGVTANGEAR_
_EQFDTLT(ph)PEPPVDPNQEVPPGPPR_
_EQT(ph)LSPTITSGLHNIAR_
_EQTLS(ph)PTITSGLHNIAR_
_ES(ph)ASPTIPNLDLLEAHTK_
_ETFSS(ph)AEGTVDKDTTIM(ox)ELR_
_ETVQTTQS(ph)PTPVEK_
_EVDGLLTSEPM(ox)GS(ph)PVSSK_
_EVVCEEPLS(ph)PATVPGM(ox)HTEDNPGK_
_EVYELLDS(ph)PGK_
_FCDS(ph)PTSDLEM(ox)R_
_FDTIY(ph)QILLK_
_FEGTT(ph)SLGEVR_
_FELAQEEY(ph)QQLHK_
_FFTT(ph)SPK_
_FIHQQPQSSS(ph)PVYGSSAK_
_FQSQADQDQQASGLQS(ph)PPSR_
_FSDSTSKT(ph)PPQEELPTR_
_FS(ph)PDSQYIDNR_
_FTSGAFLSPSVSVQECRT(ph)PR_
_FVST(ph)TTSCR_
_GACS(ph)TPDM(ox)PQFEPVK_
_GAKEEHGGLIRS(ph)PR_
_GAS(ph)SPYGAPGTPR_
_GATAAPQRKS(ph)EDDSAVPLAK_
_GDTVSAS(ph)PCSAPLAR_
_GEGPGEAGGPLT(ph)PR_
_GEPNVSY(ph)ICSR_
_GEY(ph)FAIK_
_GFTECEM(ox)TKS(ph)SPLK_
_GGAPDPSPGATATPGAPAQPS(ph)SPDAR_
_GGAPDPSPGATATPGAPAQPSS(ph)PDAR_
_GGDAKS(ph)PVLQEK_
_GGGT(ph)PDANSLAPPGK_
_GGPTSHPSPVPPPAS(ph)SPSPLSGSALCGGK_
_GGVTGSPEAS(ph)ISGSKGDLK_
_GGVTGSPEASIS(ph)GSKGDLK_
_GHLS(ph)EGLVTK_
_GHPHSAS(ph)SPSER_
_GHVT(ph)PNLSR_
_GILAADESTGS(ph)IAK_
_GIPLATGDT(ph)SPEPELLPGAPLPPPK_
_GIPLATGDTS(ph)PEPELLPGAPLPPPK_
_GKT(ph)PEEIRK_
_GLAGPPAS(ph)PGK_
_GLGHPPS(ph)SPLLKK_
_GLLASDLNTDGDM(ox)RVT(ph)PEPGAGPTQGLLR_
_GLLSQGS(ph)PLSWEETKR_
_GLNVIGASDQS(ph)PLQSPSNLR_
_GLNVIGASDQSPLQS(ph)PSNLR_
_GLPSPYNM(ox)SSAPGS(ph)R_
_GLPSPYNMSSAPGS(ph)R_
_GNAEGS(ph)SDEEGKLVIDEPAK_
_GNKS(ph)PSPPDGSPAATPEIR_
_GPPDFSSDEEREPT(ph)PVLGSGAAAAGR_
_GPSPSSPT(ph)PPAAAAPAEQAPR_
_GPSPS(ph)SPTPPAAAAPAEQAPR_
_GQPIY(ph)IQFSNHK_
_GRNS(ph)ATSADEQPHIGNYR_
_GRPPAEKLS(ph)PNPPK_
_GSALGTPAAAEPVT(ph)PTSK_
_GSEEDPLLS(ph)PVETWK_
_GS(ph)PNTASAEATLPR_
_GS(ph)SLSGTDDGAQEVVK_
_GTEAS(ph)PPQNNSGSSSPVFTFR_
_GTPM(ox)KPNTQAT(ph)PP_
_GTPMKPNTQAT(ph)PP_
_GVDLLLEGVQGES(ph)SPTRR_
_GVESSDVHPAPTVQQM(ox)SS(ph)PKPAEER_
_GVESSDVHPAPTVQQMSS(ph)PKPAEER_
_GYQSLSDS(ph)PPGSR_
_HAEAT(ph)LGSGNLR_
_HAPS(ph)PEPAVQGTGVAGVPEESGDAAAIPAKK_
_HDSGGSLPLT(ph)PR_
_HGAPAAPS(ph)PPPR_
_HGTDLWIDNMSS(ph)AVPNHSPEKK_
_HIISATSLSTS(ph)PTELGSR_
_HLEHAPS(ph)PSDVSNAPEVK_
_HLT(ph)PEPDIVASTK_
_HNGSLS(ph)PGLEAR_
_HPS(ph)SPSALR_
_HQAS(ph)INELKR_
_HRPS(ph)PPATPPPK_
_HRS(ph)SISGSLPSSGSLQAVSSR_
_HSCSGSS(ph)PPR_
_HS(ph)LEEGLDMVNR_
_HSLSGS(ph)SPGM(ox)K_
_HS(ph)PIKEEPCGSLSETVCK_
_HSS(ph)MPRPDY_
_HSTPS(ph)PTR_
_HTDDEMTGY(ph)VATR_
_HVS(ph)PVTPPR_
_HVT(ph)QEFVSR_
_IACKS(ph)PPPESM(ox)DTPTSTR_
_IACKS(ph)PPPESMDTPTSTR_
_IACKS(ph)PPPESVDTPTSTK_
_IACKS(ph)PQPDPVDTPASTK_
_IAQLSESPVILT(ph)PNAK_
_ICTLPSPPS(ph)PLASLAPVADSSTR_
_IDGATQSS(ph)PAEPK_
_IDS(ph)LSAQLSQLQK_
_IEDVGS(ph)DEEDDSGK_
_IEHAPS(ph)PSSGGTLK_
_IEVDEGFCS(ph)PKPSEIK_
_IFTTPLT(ph)PSQYYSGSK_
_IGQQVDREPGDVAT(ph)PPRK_
_IGS(ph)MTGAEQALLPR_
_IHS(ph)PIPDM(ox)SK_
_IILDLISES(ph)PIK_
_IISGS(ph)PLGSLAR_
_ILGETS(ph)LM(ox)R_
_INSAPIPSS(ph)K_
_IQNTGDY(ph)YDLYGGEK_
_ISEKEHSLEDNSS(ph)PNSLEPLK_
_ISES(ph)PEVTR_
_IS(ph)FVEEDVHPK_
_ISMQDVDLSLGS(ph)PK_
_ISREPEPAAGPQAEESATVSAPAPMS(ph)PTR_
_IVLTSLPALAVPPPT(ph)PTK_
_IVNHWAS(ph)PELR_
_KAAS(ph)TDLGAGETVVGK_
_KADTTTPTPTAILAPGSPAS(ph)PPGSLEPK_
_KADT(ph)TTPTTSAITASR_
_KAEPSEVDM(ox)NS(ph)PK_
_KAEPSEVDMNS(ph)PK_
_KALM(ox)S(ph)R_
_KAPAGQEEPGT(ph)PPSSPLSAEQLDR_
_KASVVDPSTESSPAPQEGSEQPASPAS(ph)PLSSR_
_KATLNS(ph)GM(ox)SEEEFLR_
_KAVPVES(ph)PVQKV_
_KAYS(ph)FCGTVEYM(ox)APEVVNR_
_KDS(ph)LTQAQEQGNLLN_
_KENPS(ph)PLFSIK_
_KEQSEVSVS(ph)PR_
_KFS(ph)AACNFSNILVNQER_
_KFS(ph)AGGDSDPPLK_
_KGDRS(ph)PEPGQTWTR_
_KGS(ph)LAALYDLAVLK_
_KIDAGTM(ox)AEPSAS(ph)PSK_
_KIDTHPS(ph)PSHSSTVK_
_KIPEPS(ph)PVTR_
_KIS(ph)GTTALQEALKEK_
_KIS(ph)SDLDGHPVPK_
_KLS(ph)DDPCPVESK_
_KLS(ph)DINQEEASGTSLHQK_
_KLS(ph)EADNRK_
_KLS(ph)GDQITLPTTVDYSSVPK_
_KLS(ph)LGQYDNDAGGQLPFSK_
_KLS(ph)QSFALPVTGGTVVTPK_
_KLS(ph)SGETVTYQK_
_KLSVPT(ph)SDEEDEVPAPKPR_
_KPAGAT(ph)PK_
_KPDS(ph)PPKVLEPENK_
_KPLTS(ph)SSAAPQR_
_KPLTTT(ph)PR_
_KPS(ph)PEPEGEVGPPK_
_KPTAEAS(ph)PVK_
_KPVTVSPTTPT(ph)SPTEGEAS_
_KPVTVS(ph)PTTPTSPTEGEAS_
_KRPASLS(ph)TAPSEK_
_KRS(ph)EGFSMDR_
_KRS(ph)PTESVNTPVGK_
_KSS(ph)LTQEEAPVSWEK_
_KSS(ph)LVTSK_
_KSS(ph)PSTGSLDSGNESK_
_KSS(ph)TSGSDFDTK_
_KTVDM(ox)ES(ph)TEVFTK_
_KTVT(ph)PAK_
_KVPSFTFT(ph)PTVTYQR_
_KVVVSPT(ph)K_
_KVVVS(ph)PTK_
_KVVVS(ph)PTKK_
_LAS(ph)TNSSVLGADLPSSM(ox)K_
_LAS(ph)TNSSVLGADLPSSMK_
_LATKS(ph)SPVK_
_LATNTS(ph)APDLK_
_LCS(ph)SAETLESHPDIGK_
_LDQPVSAPPS(ph)PR_
_LEDLDTCM(ox)M(ox)T(ph)PK_
_LEDLDTCM(ox)MT(ph)PK_
_LEDLDTCMM(ox)T(ph)PK_
_LEDLDTCMMT(ph)PK_
_LEEPPELNRQS(ph)PNPR_
_LEEPTPAPSTSYS(ph)PQADSLR_
_LEKPETQS(ph)SPITVQSSK_
_LEKPETQSS(ph)PITVQSSK_
_LEKS(ph)PLAGNKDNK_
_LENTS(ph)PM(ox)VK_
_LESLSETPGPS(ph)SPR_
_LGAPENSGIST(ph)LER_
_LGASNS(ph)PGQPNSVK_
_LGGAVPFAPPEVS(ph)PEQAK_
_LGHPEALSAGTGS(ph)PQPPSFTYAQQR_
_LGLHVTPSNVDQVST(ph)PPAAK_
_LGM(ox)LS(ph)PEGTCK_
_LHSYS(ph)SPSTK_
_LISHCYIPQS(ph)PEPDLHK_
_LITSEEERS(ph)PAK_
_LKEEHGIELS(ph)SPR_
_LLDT(ph)M(ox)VDTFLQK_
_LLLINNAGS(ph)LGDVSK_
_LNSEAS(ph)PSR_
_LPAVVM(ox)DTAGQAGGHAAS(ph)SPEISQPQK_
_LPDLS(ph)PVENK_
_LPDS(ph)PALAK_
_LPS(ph)QTESVTSNR_
_LQLGT(ph)PPPLLAAR_
_LQQGAGLESPQGQPEPGAAS(ph)PQR_
_LQS(ph)PIKEENTTAVEEIGR_
_LQS(ph)PLEPHSK_
_LQS(ph)PLPGESAAK_
_LSASTASELS(ph)PK_
_LSEEAECPNPST(ph)PSK_
_LSGINEIPRPFS(ph)PPVTSNTSPPPAAPLAR_
_LSKPPFQTNPS(ph)PEM(ox)VSK_
_LSPEPWT(ph)PETGLVTDAFK_
_LSTEADTDT(ph)PKK_
_LSVPTS(ph)DEEDEVPAPKPR_
_LTFDSSFS(ph)PNTGKK_
_LTLT(ph)SDESTLIEDGGAR_
_LVEPHS(ph)PSPSSK_
_LVEQANS(ph)PK_
_LVS(ph)PEPPPK_
_LYNSEESRPYT(ph)NK_
_LYSSEESRPYT(ph)NK_
_M(ox)APALSGANLTS(ph)PR_
_MAPALSGANLTS(ph)PR_
_MAPPVDDLS(ph)PK_
_MEIGDTLSTAEESS(ph)PPK_
_M(ox)EIGDTLSTAEESS(ph)PPK_
_M(ox)ESSFGS(ph)PSKQESSESLPK_
_MESSFGS(ph)PSKQESSESLPK_
_M(ox)GQAPSQSLLPPAQDQPRS(ph)PVPSAFSDQSR_
_M(ox)KS(ph)LEQDALR_
_M(ox)LLYT(ph)EVTR_
_M(ox)NGVMFPGNS(ph)PSYTER_
_MNGVMFPGNS(ph)PSYTER_
_M(ox)PDEPEEPVVAVSS(ph)PAVPPPTK_
_M(ox)PDEPEEPVVAVS(ph)SPAVPPPTK_
_MPDEPEEPVVAVS(ph)SPAVPPPTK_
_MPDEPEEPVVAVSS(ph)PAVPPPTK_
_M(ox)PLDLS(ph)PLATPIIR_
_M(ox)QNNSSPS(ph)ISPNTSFTSDGSPSPLGGIK_
_MQSLQLDCVAVPS(ph)SR_
_MSCFSRPSM(ox)S(ph)PTPLDR_
_MSCFSRPS(ph)M(ox)SPTPLDR_
_M(ox)SCFSRPSMS(ph)PTPLDR_
_MSCFSRPS(ph)MSPTPLDR_
_M(ox)S(ph)LPDVDLDLKGPK_
_M(ox)SQPGS(ph)PSPK_
_M(ox)TGSAPPPS(ph)PTPNK_
_MVSQS(ph)QPGSR_
_NDAPTPGTSTT(ph)PGLR_
_NDS(ph)PTQIPVSSDVCR_
_NIIHGSDS(ph)VK_
_NKQPT(ph)PVNIR_
_NLAPHHAS(ph)PDPPAPPASASDPHR_
_NLEELEEKSTT(ph)PPPAEPVSLPQEPPK_
_NLIDSM(ox)DQSAFAGFS(ph)FVNPK_
_NLKT(ph)LQK_
_NLNNSNLFS(ph)PVNR_
_NLS(ph)NEELTK_
_NMIPWPAS(ph)DRKK_
_NNM(ox)TAS(ph)MFDLSM(ox)KDK_
_NNMTAS(ph)M(ox)FDLSMKDK_
_NNM(ox)TAS(ph)MFDLSMKDK_
_NPSDSAVHS(ph)PFTK_
_NPVSLPSLPNPTKPNNVPSVPS(ph)PSIQR_
_NQEASLGM(ox)KT(ph)PEAPAHSEKPR_
_NQEASLGMKT(ph)PEAPAHSEKPR_
_NQS(ph)SEDILR_
_NSATFKS(ph)FEDR_
_NSGSDGSPS(ph)PLLAR_
_NSSTPGLQVPVS(ph)PTVPIQNQK_
_NST(ph)PPSLAR_
_NSVS(ph)PGLPQR_
_NTLDSEVPAAYQT(ph)PKK_
_NTVVVS(ph)PHPK_
_NVALLSQLYHS(ph)PAR_
_NWTEDM(ox)EGGISS(ph)PVK_
_NWTEDMEGGISS(ph)PVK_
_PAAMISQPPTPPT(ph)GQPVR_
_PAPPPQSQS(ph)PEVEQLGR_
_PARPPS(ph)PTEQEGAVPR_
_PAS(ph)PVAGSPK_
_PGHVSPLQLT(ph)NIQVPQQALPTQR_
_PIPQT(ph)PESAGNK_
_PLPPAAIES(ph)PAVAAPAYSR_
_PQQPQQEEVTS(ph)PVVPPSVK_
_PSPSPVS(ph)PASNPR_
_PVS(ph)PETQADLQR_
_PY(ph)HPPNEVGIEK_
_QEASTGQSPEDHASLAPPLS(ph)PDHSSLEAK_
_QEQINTEPLEDTVLS(ph)PTKK_
_QGPSPVS(ph)PNALDR_
_QGQSQAASSSSVT(ph)SPIK_
_QGSITSPQANEQS(ph)VTPQRR_
_QILIACS(ph)PVSSVR_
_QKS(ph)FSEDVISHK_
_QLS(ph)ADSAEAHSLNVNR_
_QLS(ph)SSSSYSGDISR_
_QLS(ph)TEQAVLQESLEK_
_QLVAGNS(ph)PKK_
_QNNFPM(ox)FPS(ph)PK_
_QPT(ph)PPSEAAASK_
_QPVSEPPADQVASDMPHS(ph)PTLR_
_QQFS(ph)PSM(ox)TER_
_QQFS(ph)PSMTER_
_QQLS(ph)PSPGQEAGILPETEK_
_QSHSES(ph)PSLQSK_
_QSHSGSIS(ph)PYPK_
_QSIS(ph)FSGLPSGR_
_QS(ph)SLTFQSSDPEQM(ox)R_
_QS(ph)SLTFQSSDPEQMR_
_QTLPSSPT(ph)TTK_
_QVLQST(ph)QSPR_
_QVVESAY(ph)EVIK_
_RAAPTT(ph)PPPPVK_
_RADLNQGIGEPQS(ph)PSR_
_RAQS(ph)TDSLGTSGSLQSK_
_RAS(ph)M(ox)QPIQIAEGTGITTR_
_RAS(ph)MQPIQIAEGTGITTR_
_RASS(ph)PSLIER_
_RATASEQPLAQEPPAS(ph)GGSPATTK_
_RDS(ph)LTGSSDLYK_
_RES(ph)ATADAGYAILEK_
_RES(ph)LSTSSDLYK_
_RGEGDAPFSEPGTTSTQRPSS(ph)PETATK_
_RGPEVTSQGVQTS(ph)SPACK_
_RGPEVTSQGVQTSS(ph)PACK_
_RGS(ph)LPDTQPSQGPSTPK_
_RGS(ph)PVPPVPERR_
_RHSS(ph)ETFSSTPSATR_
_RIS(ph)IVENCFGAAGQPLTIPGR_
_RIS(ph)MEDLNK_
_RIS(ph)QSQPVR_
_RKS(ph)LPAR_
_RKS(ph)YTSDLQK_
_RLDSS(ph)CLESVK_
_RLNHS(ph)PPQSSSR_
_RLS(ph)M(ox)EIEK_
_RLS(ph)MSEVKDDNSATK_
_RLSNS(ph)SLCSIEEEHR_
_RLS(ph)PPSSSAASSYSFSDLNSTR_
_RLS(ph)QRPTTEELEQR_
_RLT(ph)VNEAVK_
_RM(ox)S(ph)GEPIQTVESIR_
_RNS(ph)CNVGGGGGGFK_
_RNS(ph)SIVGR_
_RPAAAAAAGSAS(ph)PR_
_RPASPS(ph)SPEHLPATPAESPAQR_
_RPLDS(ph)PEAEELPAM(ox)K_
_RPLDS(ph)PEAEELPAMK_
_RPPTPAPWPSSGLGTPLT(ph)PPK_
_RPPT(ph)PCSDPER_
_RPS(ph)LPPSK_
_RPSQEQS(ph)ASASSGQPQAPLNR_
_RPS(ph)QEQSASASSGQPQAPLNR_
_RPS(ph)QNAISFFNVGHSK_
_RPS(ph)STSVPLGDK_
_RQS(ph)PSPSTR_
_RRDEDMLYS(ph)PELAQR_
_RRS(ph)PPADAIPK_
_RSET(ph)PPHWR_
_RS(ph)SPAAFINPPIGTVTPALK_
_RSS(ph)PPGHYYQK_
_RSS(ph)PVPPVPER_
_RSS(ph)PVYVGR_
_RSS(ph)SDLITLPATTPPCPTK_
_RST(ph)QESLTAGGTDLKR_
_RTPS(ph)DDEEDNLFAPPK_
_RT(ph)STPVIM(ox)EGVQEETDTR_
_RVPS(ph)PTPAPK_
_RWDQTADQT(ph)PGATPK_
_RWDQTADQTPGAT(ph)PK_
_RWS(ph)AEVTSSTYSDEDRPPK_
_SAADS(ph)ISESVPVGPK_
_SAAS(ph)PVVSSM(ox)PER_
_SAES(ph)PSWTPAEHVAK_
_SAESPTS(ph)PVTSETGSTFKK_
_SAHVTVSGGT(ph)PK_
_SALSPSKS(ph)PAK_
_SAM(ox)DSPVPASM(ox)FAPEPS(ph)SPGAAR_
_SAM(ox)DSPVPASM(ox)FAPEPSS(ph)PGAAR_
_SAMDSPVPASM(ox)FAPEPSS(ph)PGAAR_
_SAMDSPVPASMFAPEPSS(ph)PGAAR_
_SAS(ph)QSSLDKLDQELK_
_SASSASSLFS(ph)PSSTLFSSSR_
_SATLSGS(ph)ATNLASLTAALAK_
_SAT(ph)YSVGMQK_
_SCS(ph)M(ox)NQLSSGIPVPK_
_SCS(ph)MNQLSSGIPVPK_
_SCTPSPDQIS(ph)HRASLEDAPVDDLTR_
_SDKS(ph)PDLAPTPAPQSTPR_
_SDPDGGDS(ph)PLPASGGPLTCK_
_SES(ph)LDPDSSM(ox)DTTLILK_
_SESPFRET(ph)EPLVSPHQDK_
_SES(ph)PPPLSDPK_
_SETAPAAPAAPAPAEKT(ph)PVKK_
_SETSWES(ph)PK_
_SEVQQPVHPKPLSPDS(ph)R_
_SFS(ph)ADGFEM(ox)LQNPVK_
_SFS(ph)ADGFEMLQNPVK_
_SGAQASST(ph)PLSPTR_
_S(ph)GEGEVSGLMR_
_SGGLQT(ph)PECLSR_
_SGLCS(ph)PSYVAVTPFSLR_
_SGPSPTT(ph)PQPLR_
_S(ph)GSMDPSGAHPSVR_
_SGSS(ph)SPDSEITELK_
_SHHANS(ph)PTAGAAK_
_SHISDQS(ph)PLSSK_
_SHISDQSPLSS(ph)K_
_S(ph)IGSAVDQGNESIVAK_
_SIM(ox)VQS(ph)PEK_
_S(ph)ISSTVQR_
_S(ph)KSATLLYDQPLQVFTGSSSSSDLISGTK_
_S(ph)KSISSSNPDLAVAPGSVDDEVSR_
_SKTPT(ph)GPELDTSYK_
_SKT(ph)PVQAAAVSIVEKPVTR_
_S(ph)LATM(ox)DSPPHQK_
_SLATM(ox)DS(ph)PPHQK_
_SLAT(ph)MDSPPHQK_
_SLDQTS(ph)PCPLVLVR_
_SLDSEPSVPSAAKPPS(ph)PEK_
_SLHLS(ph)PQEQSASYQDR_
_S(ph)LLDASEEAIKK_
_SLMDPT(ph)LR_
_SLQEEQSRPPTAVS(ph)SPGGPAR_
_SLS(ph)ESSVIMDR_
_S(ph)LSIESLCPEDGHR_
_SLS(ph)PIIGK_
_SLS(ph)PSHLTEDR_
_SLS(ph)SGSNFCSEQK_
_SLTALS(ph)EPR_
_S(ph)LVGTPYWMAPELISR_
_SLVNNPKT(ph)PPDGK_
_SM(ox)S(ph)AAFCSLLAPER_
_SMS(ph)AAFCSLLAPER_
_SM(ox)S(ph)ENAVR_
_S(ph)M(ox)SGGHGLR_
_SMS(ph)GGHGLR_
_SM(ox)S(ph)IDDTPR_
_SMS(ph)IDDTPR_
_SNM(ox)S(ph)PDKPVSVK_
_SNS(ph)IQQMEQLNR_
_S(ph)NSM(ox)LELAPK_
_SNVSSPATPTASSSSSTT(ph)PTR_
_SPAAPGQS(ph)PTGSVCYER_
_SPAGPAATPAQAQAAST(ph)PR_
_SPFNSPS(ph)PQDSPR_
_SPGAGSLGS(ph)PASQR_
_SPLGEAPPGT(ph)PPCR_
_S(ph)PNSHDSEPWTLLR_
_S(ph)PPTQVAISSDSAR_
_SPQIS(ph)M(ox)SDIDLNLK_
_SPQISMS(ph)DIDLNLK_
_SPQQTVPYVVPLS(ph)PK_
_S(ph)PQTLAPVGEDAM(ox)K_
_SPS(ph)ESFIGR_
_SPSFGDPQLS(ph)PEAR_
_S(ph)PSFGDPQLSPEAR_
_SPS(ph)GSAFGSQENLR_
_S(ph)PSKPLPEVTDEYKNDVK_
_S(ph)PVPAQIAITVPK_
_S(ph)PVSPLAAQGIPLPAQLTK_
_SQDATFSPGSEQAEKS(ph)PGPIVSR_
_SQIDVALS(ph)QDSTYQGER_
_SQLGAHHT(ph)TPVGDGAAGTR_
_SQS(ph)TTFNPDDMSEPEFK_
_SQS(ph)TTFNPDDMSEPEFKR_
_S(ph)RQPSPLLLLPPPAGLTSDPGPSVR_
_SRS(ph)APPNLWAAQR_
_SRS(ph)FTLDDESLK_
_SRS(ph)GEGEVSGLM(ox)R_
_S(ph)RSGEGEVSGLM(ox)R_
_SRS(ph)GEGEVSGLMR_
_SRT(ph)ASGSSVTSLDGTR_
_SRTASGS(ph)SVTSLDGTR_
_S(ph)SAIGIENIQEVQEK_
_SSFASSSASDASKPSS(ph)PR_
_S(ph)SGSPYGGGYGSGGGSGGYGSR_
_SSIETKPDAS(ph)PQLPK_
_SSPAPSENTHIS(ph)PLK_
_S(ph)SSETILSSLAGSDIVK_
_S(ph)SSPVTELASR_
_S(ph)TEPELIQVK_
_STFS(ph)PISDIGLAK_
_STICLSVCFAEDETY(ph)MRR_
_STKPVVFS(ph)PTLM(ox)LTDEEK_
_STKPVVFS(ph)PTLMLTDEEK_
_S(ph)TQESLTAGGTDLKR_
_STQIENQHQGAQDTSDLM(ox)S(ph)PSKR_
_STQIENQHQGAQDTSDLMS(ph)PSKR_
_S(ph)VELDLNQAHM(ox)EETPK_
_S(ph)VELDLNQAHMEETPK_
_SVGS(ph)HR_
_S(ph)VSPTTEM(ox)VSNESVDYR_
_S(ph)VSPTTEMVSNESVDYR_
_SVS(ph)SENPTYPSAPLKPVTVPPR_
_SVSS(ph)VLSSLTPAK_
_SVTPDSLGHT(ph)PPAR_
_S(ph)VTPDSLGHTPPAR_
_SVT(ph)PDSLGHTPPAR_
_S(ph)YSSPDITQAIQEEEKR_
_SYS(ph)SPDITQAIQEEEKR_
_TALINS(ph)TGEEVAM(ox)R_
_TAPVASTPSSTPIPALS(ph)PPTK_
_TAS(ph)ELLLDR_
_TASESISNLS(ph)EAGSIK_
_TAS(ph)GSSVTSLDGTR_
_TAS(ph)LTSAASVDGNR_
_TAS(ph)PPGPPPYGK_
_T(ph)ASQGPQTDSVIQNSENIK_
_TAS(ph)QGPQTDSVIQNSENIK_
_TAT(ph)PLTTMK_
_TCDSITPSKSS(ph)PVPVSDTQK_
_TDESSPVLS(ph)PR_
_TDKS(ph)SASAPDVDDPEAFPALA_
_T(ph)DSREDEISPPPPNPVVK_
_TDSVIIADQTPT(ph)PTR_
_TEELIESPKLES(ph)SEGEIIQTVDR_
_TEIMS(ph)PLYQDEAPK_
_TEM(ox)DKS(ph)PFNSPSPQDSPR_
_TEMDKS(ph)PFNSPSPQDSPR_
_TESITATSPASM(ox)VGGKPGS(ph)FR_
_TESIT(ph)ATSPASMVGGKPGSFR_
_T(ph)ESPATAAETASEELDNR_
_TESPAT(ph)AAETASEELDNR_
_TFVLTPELS(ph)PGK_
_TGSEPALS(ph)PAVVR_
_T(ph)GSGGPGNHPHGPDASAEGLNPYGLVAPR_
_T(ph)GSNISGASSDISLDEQYK_
_T(ph)GSPGSEVVTLQQFLEESNK_
_THSVPATPTST(ph)PVPNPEAESSSK_
_TIAATPIQTLPQS(ph)QSTPK_
_TIS(ph)PPTLGTLR_
_TKADVTPPPDGS(ph)TTHNLEVSPK_
_T(ph)LDQSPELR_
_TLEQHDNIVTHY(ph)K_
_TLGT(ph)PTQPGSTPR_
_TLIS(ph)HK_
_TLNM(ox)TTS(ph)PEEKR_
_TLNMT(ph)TSPEEKR_
_TLTDEVNS(ph)PDSDRR_
_TMIIS(ph)PER_
_TM(ox)IIS(ph)PERLDPFADGGK_
_TNSM(ox)SSSGLGS(ph)PNR_
_TNSMSSSGLGS(ph)PNR_
_T(ph)NTPVKEDWNVR_
_TNT(ph)PVKEDWNVR_
_TPASTPVSGTPQAS(ph)PM(ox)IER_
_TPIITPNT(ph)K_
_TPKDS(ph)PGIPPSANAHQLFR_
_TPLDLFAHFGPEPGDHSDPLPPSAPS(ph)PTR_
_TPLGAS(ph)LDEQSSSTLK_
_TPQS(ph)PTLPPAK_
_TPS(ph)SNTLDDYM(ox)SCFR_
_TPTPSTPGDT(ph)QPNTPAPVPPAEDGIK_
_TPVQYSQQQNS(ph)PQK_
_TQPDGTSVPGEPAS(ph)PISQR_
_TQPHHST(ph)PTK_
_TQS(ph)GNFYTDTLGM(ox)AEFR_
_TQS(ph)GNFYTDTLGMAEFR_
_TQS(ph)PGGCSAEAVLAR_
_TQTES(ph)STPPGIPGGSR_
_TSAVSS(ph)PLLDQQR_
_T(ph)SPLKDNPSPEPQLDDIKR_
_T(ph)SPLVSQNNEQGSTLR_
_TSPS(ph)SPAPLPHQEATPR_
_T(ph)SPTVATQTGASATSTR_
_T(ph)SSAELSTSAPDEPLLQK_
_TSSAFVGKT(ph)PEASPEPK_
_TSS(ph)EDNLYLAVLR_
_TSSISGPLS(ph)PAYTGQVPYNYNQLEGR_
_T(ph)SSQYM(ox)R_
_TSTFCGT(ph)PEFLAPEVLTDTSYTR_
_T(ph)STFCGTPEFLAPEVLTETSYTR_
_TSVATSTEGKDKDVTLS(ph)PVK_
_TTEEQVQAST(ph)PCPR_
_TTPES(ph)PPYSSGSYDSIK_
_TTS(ph)FKGTSPSSK_
_TTWGDGGENS(ph)PCNVVSK_
_TVCST(ph)YLQSR_
_TVDM(ox)ES(ph)TEVFTK_
_TVDMEST(ph)EVFTK_
_TVNSTRET(ph)PPK_
_T(ph)YAVSYVPK_
_TYS(ph)APAINAIQVPK_
_VAAAAGSGPS(ph)PPGSPGHDR_
_VASEAPLEHKPQVEAS(ph)SPR_
_VASPSQGQVGSSS(ph)PK_
_VAVAT(ph)PAKK_
_VDHGAEIITQS(ph)PGR_
_VDS(ph)PTVNTTLR_
_VEQM(ox)PQAS(ph)PGLAPR_
_VEVAAPAHRGT(ph)PDTDLEVQR_
_VGDPPQPLPEEPM(ox)EVQGAERAS(ph)PEPQR_
_VGGS(ph)SVDLHR_
_VGPAT(ph)PSAQVGK_
_VHNNS(ph)PDTSR_
_VIEDNEY(ph)TAR_
_VIQPM(ox)GM(ox)S(ph)PR_
_VIQPMGMS(ph)PR_
_VKS(ph)PGGPGSHVR_
_VLAPILPDNFST(ph)PTGSR_
_VLDSVEAGDTT(ph)PPTK_
_VLDTSSLTQSAPAS(ph)PTNK_
_VLGTS(ph)PEAIDSAENR_
_VLS(ph)GQDTEDR_
_VLT(ph)PPQAAGDGILATTANQR_
_VPCNVEGIS(ph)PELEK_
_VPKPEPIPEPKEPS(ph)PEK_
_VPS(ph)GIFDVNSR_
_VQEAAT(ph)IK_
_VQIS(ph)PDSGGLPER_
_VQS(ph)PEPPAPER_
_VQS(ph)PSQTR_
_VQT(ph)TPKVEEEQDLK_
_VQTT(ph)PPPAVQGQK_
_VRASLDS(ph)AGGSGSSPILLPTPVVGGPR_
_VSCHDS(ph)DDDIM(ox)R_
_VSCHDS(ph)DDDIMR_
_VSDQNS(ph)PVLPK_
_VSEEQTQPPS(ph)PAGAGM(ox)STAM(ox)GR_
_VSEEQTQPPS(ph)PAGAGM(ox)STAMGR_
_VSEEQTQPPS(ph)PAGAGMSTAM(ox)GR_
_VSLEPHQGPGT(ph)PESK_
_VSM(ox)PDVELNLKS(ph)PK_
_VSMPDVELNLKS(ph)PK_
_VSPGLPS(ph)PNLENGAPAVGPVQPR_
_VSTTTDSPVS(ph)PAQAASPFIPLDELSSK_
_VSVGAPDLSLEASEGS(ph)IKLPK_
_VTAEADSSS(ph)PTGILATSESK_
_VTGPPPGT(ph)PQPR_
_VTS(ph)RGPDEEAVVDLGK_
_VVGQTT(ph)PESFEK_
_VVPSFLPVDQGGS(ph)LVGR_
_VVSQSQPGS(ph)R_
_VWS(ph)PLVTEEGKR_
_WLSTSIPEAQWHS(ph)SLAR_
_YCRPESQEHPEADPGSAAPY(ph)LK_
_YDERPGPS(ph)PLPHR_
_Y(ph)FPSPLPMASHT_
_YGS(ph)IVDDER_
_YHGHS(ph)M(ox)SDPGVSYR_
_YNASSVT(ph)PESLR_
_YNTEGRVS(ph)PSPSQESLSSSK_
_YQES(ph)PGIQM(ox)K_
_YRS(ph)PYSGPK_
_YSEEGLS(ph)PSK_
_YSHSGSSS(ph)PDTK_
_YSQSAPGSPVS(ph)AQPVIM(ox)AVPPRPSSLVAK_
_YS(ph)TLHTQSAEPPPPPEPAR_
_YVAICNPLLYM(ox)VVVS(ph)R_
_AAAAAATAPPS(ph)PGPAQPGPR_
_AAGS(ph)PSPLPAPDPAPK_
_AAS(ph)PPASASDLIEQQQK_
_AAVVTS(ph)PPPTTAPHK_
_AFM(ox)ES(ph)PK_
_AGETRFT(ph)DTR_
_AGLQM(ox)KS(ph)PEK_
_AHTPT(ph)PGIYM(ox)GR_
_AIPGDQHPES(ph)PVHTEPMGIQGR_
_AISAPT(ph)SPTR_
_AIT(ph)PPQQPYK_
_AKT(ph)PVTLK_
_ALTT(ph)PTHYK_
_AM(ox)STTSISS(ph)PQPGK_
_AQTLPTSVVTITSES(ph)SPGKR_
_AQT(ph)PPGPSLSGSK_
_ASSHS(ph)SQTQGGGSVTK_
_ATQCLVKS(ph)PEVK_
_AVTIANS(ph)PSKPSEK_
_CLS(ph)PGGHPTYR_
_CTIGMVGEGS(ph)IQSSR_
_DSLIT(ph)PHVSR_
_DVT(ph)PPPETEVVLIK_
_EACAS(ph)DPR_
_EASFLS(ph)AR_
_ELS(ph)PQHKR_
_EQNPLYDT(ph)ER_
_FFTT(ph)PSK_
_GEAAAERPGEAAVAS(ph)SPSK_
_GLNSSFETS(ph)PK_
_GPVS(ph)PSVSFQPLAR_
_HVDSLSQRS(ph)PK_
_HVDSLS(ph)QRSPK_
_HVSPVT(ph)PPR_
_IAQVS(ph)PGPR_
_IEEVLSPEGSPSKS(ph)PSK_
_IGEGTY(ph)GVVYK_
_ILIVTQT(ph)PHYM(ox)R_
_ILIVTQT(ph)PHYMR_
_IM(ox)AT(ph)PEQVGK_
_IQGM(ox)VYT(ph)VLDK_
_IVDS(ph)PEKLK_
_KAS(ph)AISIK_
_KGS(ph)FSALVGR_
_KGS(ph)PTPGFSTR_
_KHES(ph)PLLVTK_
_KHS(ph)EEAEFTPPLK_
_KLEDVKNS(ph)PTFK_
_KLSELTS(ph)R_
_KLS(ph)PIIEDSR_
_KLTPT(ph)EK_
_KPGPPLS(ph)PEIR_
_KPIS(ph)THTVDFTFNK_
_KQIT(ph)MEELVR_
_KQS(ph)SSEISLAVER_
_KSS(ph)TVATLQGTPDHGDPR_
_KTPSEEDFET(ph)IK_
_KTS(ph)PASLDFPESQK_
_KTS(ph)TLQTVR_
_KVAVAT(ph)PAKK_
_KVLS(ph)PTAAK_
_LCSSAETLESHPDIGKS(ph)TPQK_
_LDHALNSPTS(ph)PCEEVIK_
_LDHALNS(ph)PTSPCEEVIK_
_LDHALNSPT(ph)SPCEEVIK_
_LGAGGGS(ph)PEK_
_LGASNS(ph)PGQPNSVKR_
_LHQLS(ph)GSDQLESTAHSR_
_LYINHT(ph)PPPLSK_
_MALPPQEDATAS(ph)PPR_
_M(ox)ANSS(ph)PVLSK_
_M(ox)LQALS(ph)PK_
_NSQPNRYT(ph)NR_
_NTDVAQS(ph)PEAPKQEAPAK_
_NTRT(ph)IQR_
_NYSS(ph)PPPCHLSR_
_PAAMISQPPT(ph)PPTGQPVR_
_PAT(ph)PGASSVEQLR_
_PIRPGQHPAAS(ph)PTHPSAIR_
_PLIS(ph)NLK_
_PPTRT(ph)SYR_
_PQTS(ph)PSPK_
_PRPSIT(ph)K_
_PSADLTNSSAPSPS(ph)HK_
_PSMS(ph)PTPLDR_
_QIT(ph)M(ox)EELVR_
_QIT(ph)MEELVR_
_QKS(ph)PEIHR_
_QTPS(ph)PDVVLR_
_QVS(ph)VLIQHQR_
_RAS(ph)AAAAAGGGATGHPGGGQGAENPAGLK_
_RAS(ph)SLNFLNK_
_RASS(ph)LNVLNVGGK_
_RFS(ph)EGVLQSPSQDQEK_
_RGS(ph)PTTGFIEQK_
_RIPHS(ph)PAR_
_RLS(ph)IIGPTSR_
_RLS(ph)ISK_
_RLS(ph)SFVTK_
_RNSVT(ph)PLASPEPTK_
_RPAS(ph)PSSPEHLPATPAESPAQR_
_RSS(ph)AIGIENIQEVQEK_
_RS(ph)SAIGIENIQEVQEK_
_RSS(ph)LLSLMTGK_
_RTS(ph)PSSLPGR_
_RYPSSISSS(ph)PQK_
_RYS(ph)PPIQR_
_SAQGS(ph)SSPVPSM(ox)VQK_
_SEVQQPVHPKPLS(ph)PDSR_
_SGAHSSAS(ph)PPR_
_SKPIPIM(ox)PAS(ph)PQK_
_SPPTTM(ox)LLPAS(ph)PAK_
_SSDQPLTVPVS(ph)PK_
_SS(ph)SPAPADIAQTVQEDLR_
_S(ph)STPLPTISSSAENTR_
_S(ph)TTPPPAEPVSLPQEPPK_
_ST(ph)TPPPAEPVSLPQEPPK_
_S(ph)VQLWPAMEYLAM(ox)LWR_
_TET(ph)PIVSK_
_TFS(ph)ATVR_
_TIS(ph)NPEVVM(ox)K_
_TKS(ph)LIAQDHR_
_TLNAETPKSS(ph)PLPAK_
_T(ph)LRDSPNVEAAHLAR_
_TPASTPVSGT(ph)PQASPMIER_
_TPIS(ph)PLK_
_TVHRS(ph)PLLLGAQR_
_TYSTSFT(ph)PM(ox)YHAVTK_
_VAHSDKPGS(ph)TSTASFR_
_VIQPM(ox)GMS(ph)PR_
_VPLT(ph)PTR_
_VSNLQVS(ph)PK_
_VT(ph)ESEIKR_
_VVVSPT(ph)KK_
_YHGHSMS(ph)DPGVSYR_
_YNAPTSHVT(ph)PSVK_
_YNASSVT(ph)PESLRK_
_YNASS(ph)VTPESLRK_
_YPPYTT(ph)PPR_
_YRS(ph)PEPDPYLSYR_
_AAFTTPDHAPLSPQS(ph)SVASSGSEQTEEQGSSR_
_ADEASELACPT(ph)PKEDGLAQQQTQLNLR_
_ADSGPTQPPLSLS(ph)PAPETK_
_AEFTS(ph)PPSLFK_
_ALPQT(ph)PRPR_
_ALS(ph)PVIPLIPR_
_ALSSDSILS(ph)PAPDAR_
_ALVAT(ph)PGKK_
_ANAS(ph)PQKPLDLK_
_ANT(ph)PELKK_
_APGASPGNPLS(ph)PSLSDKDR_
_APPT(ph)PPKNPEEEQK_
_APS(ph)YSGLSM(ox)VSGVK_
_APS(ph)YSGLSMVSGVK_
_AQS(ph)SPAAPASLSAPEPASQAR_
_AS(ph)GEM(ox)ASAQYITAALR_
_AS(ph)PAPGSGHPEGPGAHLDMNSLDR_
_ASS(ph)LEDLVLK_
_ASSLSES(ph)SPPK_
_ASSLSESS(ph)PPK_
_ATGAALT(ph)PTEERR_
_DEILPT(ph)TPISEQK_
_DINTFVGT(ph)PVEK_
_DLISLDS(ph)SPAKER_
_DLS(ph)PQHMVVR_
_DM(ox)ES(ph)PTKLDVTLAK_
_DMES(ph)PTKLDVTLAK_
_DMESPT(ph)KLDVTLAK_
_DMQPLS(ph)PISVHER_
_DNS(ph)PPPAFKPEPPK_
_DNTFFRES(ph)PVGR_
_DSFSHS(ph)PGAVSSLK_
_EAAVSASDILQESAIHS(ph)PGTVEK_
_EALAEAALES(ph)PRPALVR_
_EALGLGPPAAQLT(ph)PPPAPVGLR_
_EDSGLFS(ph)PIR_
_EISS(ph)PARPCSFEEAM(ox)K_
_EKDLLPS(ph)PAGPVPSK_
_ELSNS(ph)PLRENSFGSPLEFR_
_ELS(ph)TSPCNPIVR_
_ELVEPLT(ph)PSGEAPNQALLR_
_EPILSSEPSPAVTPVT(ph)PTTLIAPR_
_ESMFS(ph)WDETEYKIPAR_
_EVDGLLTS(ph)EPMGSPVSSK_
_FGQAATM(ox)EGIGAIGGT(ph)PPAFNR_
_FIQELSGSS(ph)PK_
_FQETEFLS(ph)PPR_
_FSSVSS(ph)PQPR_
_FVAFSGEGQS(ph)LR_
_GACST(ph)PDM(ox)PQFEPVK_
_GACST(ph)PDMPQFEPVK_
_GEAAAERPGEAAVASS(ph)PSK_
_GFTECEMTKSS(ph)PLK_
_GFTECEMT(ph)KSSPLK_
_GKS(ph)SEPVVIM(ox)K_
_GLLS(ph)PPM(ox)GQSGLR_
_GLYDGPVCEVSVT(ph)PK_
_GNDPLTSS(ph)PGR_
_GSGGLFS(ph)PSTAHVPDGALGQR_
_GVEPSPS(ph)PIKPGDIKR_
_HAS(ph)PILPITEFSDIPR_
_HLAESESLLTS(ph)PPK_
_HNLDVVS(ph)PIPANK_
_HPPVLT(ph)PPDQEVIR_
_HQDGLPYIDDS(ph)PSSSPHLSSK_
_IAASSS(ph)FR_
_ICRDPQT(ph)PVLQTK_
_IDS(ph)PGFKPASQQK_
_IGPLGLS(ph)PK_
_IHGSGHVEEPAS(ph)PLAAYQK_
_IKT(ph)LGTGSFGR_
_ILELLYS(ph)WTVEEPLGVT_
_ILEQQNSSRT(ph)LEK_
_IPCES(ph)PPLEVVDTTASTKR_
_IPSKEEEADMSS(ph)PTQR_
_IRS(ph)SVEKENQK_
_KLENS(ph)PLGEALR_
_KLS(ph)LPTDLKPDLDVK_
_KNS(ph)EPGSPHSLEALR_
_KTVFS(ph)PTLPAAR_
_KVTS(ph)PLQSPTK_
_KVYEDSGIPLPAES(ph)PK_
_LDPFADGGKT(ph)PDPK_
_LDSS(ph)PSVSSTLAAK_
_LDT(ph)FCGSPPYAAPELFQGK_
_LFQLGPPS(ph)PVK_
_LGST(ph)SHFPQEK_
_LIDSSGSASVLTHSSS(ph)GNSLK_
_LIY(ph)LVPEK_
_LLAAGS(ph)PLAHSR_
_LLPS(ph)PVTCTPK_
_LNIT(ph)PTKK_
_LPSGSGAAS(ph)PTGSAVDIR_
_LPS(ph)PTSPFSSLSQDQAATSK_
_LPSS(ph)PVYEDAASFK_
_LPS(ph)SPVYEDAASFK_
_LQAKES(ph)PQR_
_LQALAEEPSQPHT(ph)RSPAK_
_LQNAT(ph)PTNFK_
_LQPQEIS(ph)PPPTANLDR_
_LRPKS(ph)PPPK_
_LSLEGDHSTPPSAY(ph)GSVK_
_LVFDNCET(ph)FNEDDSDIGR_
_MDRT(ph)PPPPTLSPAAITVGR_
_M(ox)DSNFGLAGLPGS(ph)PK_
_MPFLSISS(ph)PK_
_M(ox)PFLSISS(ph)PK_
_MPLPS(ph)PTESR_
_MS(ph)ESPTPCSGSSFEETEALVNTAAK_
_M(ox)TIS(ph)QQEFGR_
_MYPPRS(ph)PK_
_NAEAVLQS(ph)PGLSGK_
_NCPS(ph)PVLIDCPHPNCNKK_
_NFELVDSS(ph)PCKK_
_NLEELEEKS(ph)TTPPPAEPVSLPQEPPKPR_
_NLGS(ph)INTELQDVQR_
_NPSDSAVHS(ph)PFTKR_
_NSAS(ph)VGIIQR_
_NTSDFVY(ph)LK_
_PAAPPRPLDRES(ph)PGVENK_
_PFSAPKPQTS(ph)PSPK_
_PGAGQPGEFHT(ph)TPPGTPR_
_PS(ph)SPGGLPEEDSVLFNK_
_PVPDS(ph)PVSVTR_
_QAMLQLY(ph)VLK_
_QAS(ph)TDAGTAGALTPQHVR_
_QLPLEPES(ph)PSGQVGPR_
_QVAEQGGDLS(ph)PAANR_
_RFS(ph)PSQVPIQTR_
_RHS(ph)VTLPSSK_
_RIS(ph)SSSVQPCSEEVSTPQDSLAQCK_
_RLPS(ph)SPASPSPK_
_RLS(ph)QSDEDVIR_
_RNS(ph)VERPAEPVAGAATPSLVEQQK_
_RPGGS(ph)SPLNAVPCEGPPGSEPPR_
_RQS(ph)FASLALR_
_RQS(ph)PEPSPVTLGR_
_RRAS(ph)QEANLLTLAQK_
_RS(ph)PVPAQIAITVPK_
_RTSS(ph)EDNLYLAVLR_
_RT(ph)SSEDNLYLAVLR_
_RVS(ph)SSAGNAAVIK_
_SAS(ph)LSHPGGEGEPAR_
_SAS(ph)MKLPDNTVK_
_SAS(ph)TDLGTADVVLGR_
_SAS(ph)VNKEPVSLPGIMR_
_SCFESS(ph)PDPELK_
_SES(ph)PPAELPSLR_
_SFNYS(ph)PNSSTSEVSSTSASK_
_SFT(ph)PDHVVYAR_
_SGIETFS(ph)PPPPPPK_
_SGS(ph)AAQAEGLCK_
_SKPIPIMPAS(ph)PQK_
_SKS(ph)NPDFLKK_
_SLENPTPPFT(ph)PK_
_SLFS(ph)PQNTLAAPTGHPPTSGVEK_
_SLPTTVPES(ph)PNYR_
_SLS(ph)IEIGHEVK_
_S(ph)LSTSGESLYHVLGLDK_
_S(ph)NSAPLIHGLSDTSPVFQAEAPSAR_
_SNT(ph)ENLSQHFR_
_SPGS(ph)PVGEGTGSPPK_
_S(ph)PTAALNESLVECPK_
_SPTS(ph)PLNMK_
_SQDVAVS(ph)PQQQQCSK_
_S(ph)QEM(ox)VHLVNK_
_SRPFTVAASFQSTSVKS(ph)PK_
_SRPTS(ph)FADELAAR_
_SRTS(ph)PVTR_
_SSPFKVS(ph)PLTFGR_
_SSPVNNHHS(ph)PGQTPTLGQPEAR_
_SSS(ph)PELVTHLK_
_SSVKT(ph)PEPVVPTAPEPHPTTSTDQPVTPK_
_STAQQELDGKPAS(ph)PTPVIVASHTANKEEK_
_STLNPQWNES(ph)FTFK_
_STS(ph)PVTDPSIPIR_
_S(ph)TSQGSINSPVYSR_
_STT(ph)PPPAEPVSLPQEPPKPR_
_TFS(ph)LDAVPPDHSPR_
_TGSDHTNPTS(ph)PLLVK_
_THS(ph)FENVSCHLPDSR_
_TIAHS(ph)PTSFTESSSK_
_TIS(ph)TSDPAEVLVK_
_TIT(ph)PPAAPKPK_
_TLDFDPLLSPAS(ph)PKR_
_TNPPTQKPPS(ph)PPM(ox)SGR_
_TNPPTQKPPS(ph)PPMSGR_
_TPASTPVSGT(ph)PQASPM(ox)IER_
_TPASTPVS(ph)GTPQASPMIER_
_TPLS(ph)PSPM(ox)K_
_TPTVPDS(ph)PGYM(ox)GPTR_
_TQMAEVLPS(ph)PR_
_TQTPPVSPAPQPTEERLPSS(ph)PVYEDAASFK_
_TSLAEDSCLGRHS(ph)PVPR_
_TSLPTVGPSGLYS(ph)PSTNR_
_TSS(ph)VVTLEVAK_
_T(ph)TGLCVATPARLR_
_TVS(ph)PPIRK_
_VADPDHDHTGFLTEY(ph)VATR_
_VDNLTYRT(ph)SPDTLR_
_VEQMPQAS(ph)PGLAPR_
_VIAIDSDAES(ph)PAKR_
_VLS(ph)PTAAK_
_VPVAS(ph)PSAHNISSSGGAPDR_
_VSEEQTQPPS(ph)PAGAGMSTAMGR_
_VY(ph)SQITVQK_
_YSPT(ph)SPTYSPTSPK_
_YSSS(ph)EVNHLSPR_
_YVSGSS(ph)PDLVTR_
_AASDPLLSSVS(ph)PAVSK_
_AEELSPAALS(ph)PSLEPIR_
_AESSSGGGTVPSSAGILEQGPSPGDGS(ph)PPKPK_
_AGKLS(ph)PLK_
_AGTGYAS(ph)PDRTHVLAAGK_
_AKS(ph)PTPESSTIASYVTLR_
_ALES(ph)PERPFLAILGGAK_
_ALS(ph)SDSILSPAPDAR_
_ANLQQAIVT(ph)PLKPVDNTYYK_
_APVPSTCSSTFPEELS(ph)PPSHQAK_
_AQVAMS(ph)TLPVEDEESSESR_
_ASEPLLS(ph)PPPFGESR_
_ASLLHSMPTHSS(ph)PR_
_ASS(ph)HSSQTQGGGSVTK_
_AVPMAPAPAS(ph)PGSSNDSSAR_
_AVS(ph)FHLVHR_
_CGVMLQT(ph)LCNKCWIK_
[truncated: 1,280 more rows]

## Sheet: Table S1-3rd IMAC
Table S1. Identification of the unique phosphopeptide sequence in different IMAC steps. Modified_Sequence of 3rd IMAC.
_M(ph)MEGN(ph)GT(ox)E(ph)NSCSR_
_DPS(ph)Y(ph)S(ph)LQVQR_
_DVIY(ph)EE(ph)ESR(ph)_
_Y(ph)IVFVTNY(ph)PLTIS(ph)GK_
_QLLLVES(ph)T(ph)T(ph)VATR_
_QGLT(ph)QLS(ph)NLLNS(ph)K_
_ST(ph)E(ph)YTFFSAPHHT(ph)YSK_
_HLTEKFY(ph)S(ph)MRS(ph)SR_
_MY(ph)REEPT(ph)S(ph)IMNAIKLR_
_RVLDVEVY(ph)SS(ph)RS(ph)K_
_TPSGS(ph)RMS(ph)AEAS(ph)ARPLR_
_T(ph)S(ph)PIGSAEEDS(ph)GGRVKK_
_Y(ph)WS(ph)S(ph)RKSK_
_FEIQEWT(ph)S(ph)K_
_IY(ph)QT(ph)EELR_
_LAS(ph)EM(ox)T(ph)LIEPAVL_
_M(ox)LES(ph)PS(ph)VAIYIK_
_MMEGNGT(ph)ENS(ph)CSR_
_PY(ph)S(ph)FIEFDTFIQK_
_S(ph)ALT(ph)QHMER_
_ETGY(ph)T(ph)ELVK_
_KVEIS(ph)S(ph)LSK_
_QDGS(ph)VDFGRKWDPY(ph)K_
_QTIIGQPMS(ph)VTIT(ph)TK_
_SALIPQHSAGCDS(ph)T(ph)PTTK_
_S(ph)KQQEIY(ph)QELTR_
_TT(ph)GS(ph)NIPMDQPCCR_
_AFQPPY(ph)SS(ph)SLFR_
_ATLHS(ph)GELLGLLS(ph)VPPR_
_ENT(ph)FILGGVY(ph)GELK_
_LMT(ph)DT(ph)INEPILLCR_
_QMLLDAVPLS(ph)CNIS(ph)K_
_RSISLGGAY(ph)PNIS(ph)CLSSLK_
_S(ph)FSAASAITPSVS(ph)R_
_AFGNFS(ph)TLT(ph)K_
_ET(ph)DIPQLS(ph)QASR_
_LDS(ph)MGFTVLAT(ph)VLELNSPGAIELR_
_LFLPNLT(ph)LFLDS(ph)R_
_NNLPISISS(ph)NVS(ph)ISR_
_QIY(ph)AVAT(ph)LR_
_QQNS(ph)PLAKS(ph)K_
_S(ph)FSAASAITPS(ph)VSR_
_SY(ph)S(ph)LAGR_
_T(ph)NLPS(ph)NMLPK_
_T(ph)T(ph)VIENGEIR_
_TY(ph)PDFLMLLNS(ph)FTSSQVK_
_EAT(ph)WES(ph)VSM(ox)M(ox)LQLLSSLK_
_HMPPEVLDT(ph)FS(ph)IDAK_
_IVYS(ph)TYS(ph)R_
_LS(ph)CAASGFT(ph)FSTTSR_
_QEEEQS(ph)EIMEYS(ph)VLLPR_
_TDSFYHS(ph)S(ph)GGLELYGEPR_
_T(ph)PPHGGEVELGS(ph)QIQK_
_VPAPVEIPVT(ph)PPT(ph)LVSGLK_
_AT(ph)GDPT(ph)LLELGR_
_DLS(ph)S(ph)MIIQGELDQVLLR_
_LNSSIQY(ph)VLEVTS(ph)MFPQR_
_LNSSIQY(ph)VLEVT(ph)SMFPQR_
_NETSGSEVLT(ph)S(ph)VSDPK_
_VYT(ph)QNTPTADGHLLTLMS(ph)TR_
_AET(ph)LVFSTHAVIS(ph)MR_
_EY(ph)LSLS(ph)DK_
_IEM(ox)FS(ph)EEES(ph)LVR_
_LTSTPGNQISS(ph)QPQGET(ph)K_
_PALPS(ph)Y(ph)WALGFHLSR_
_QNVLLS(ph)ATLT(ph)EGVTR_
_QTIT(ph)FQECVHDDS(ph)R_
_SSTSGSLET(ph)TSS(ph)K_
_T(ph)IVS(ph)CTPVHLVDK_
_VDALM(ox)S(ph)S(ph)VPK_
_AFVGS(ph)DS(ph)GSSSTGDAAR_
_ATSAVPSDNLPT(ph)Y(ph)K_
_EFS(ph)AGTVY(ph)PETNK_
_LMT(ph)PIMY(ph)AAR_
_M(ox)DLT(ph)YIPEDLS(ph)SCPK_
_PLHS(ph)S(ph)LGDR_
_QQFVNY(ph)AT(ph)EK_
_T(ph)QHGVLS(ph)QQFVELINK_
_EVT(ph)LET(ph)LVK_
_VAFTGS(ph)T(ph)EVGHLIQK_
_VEEAS(ph)T(ph)PK_
_LLY(ph)S(ph)IGANVSAEK_
_LVALY(ph)T(ph)LAVWLK_
_MDMS(ph)VLEISGIIMS(ph)R_
_M(ox)EGIPVIVIHCY(ph)Y(ph)Y_
_YLS(ph)ELQQS(ph)EALK_
_Y(ph)NIS(ph)QLEEWLR_
_EDAPLST(ph)VIALIT(ph)VSDR_
_EMIS(ph)LLS(ph)PQK_
_PQHVT(ph)ET(ph)FHPDPNWK_
_S(ph)VPM(ox)ISNNVT(ph)LLSLK_
_AET(ph)VTS(ph)VAK_
_EVPT(ph)T(ph)LK_
_ILLCLPLLLLLS(ph)GWS(ph)R_
_S(ph)PY(ph)NGVR_
_SYLLQS(ph)T(ph)ELK_
_TLGWEPGHLLLT(ph)ICT(ph)VR_
_ARAS(ph)ET(ph)GSTASCAGRWR_
_AY(ph)NS(ph)QVQLTVNANQK_
_DLQEVT(ph)AKT(ph)K_
_DY(ph)KTGFGGKFGVQS(ph)ER_
_EKPPEEPTTWT(ph)GY(ph)FGK_
_EKSY(ph)FS(ph)GLSK_
_EKY(ph)KNS(ph)K_
_ELAANSSRS(ph)T(ph)TPRGK_
_FPELPEIQQTS(ph)EET(ph)K_
_KQGPGPARDY(ph)S(ph)PYFK_
_LQEY(ph)QS(ph)AIK_
_M(ox)DS(ph)LFVEEVAAS(ph)LVREFLSR_
_QAT(ph)VNVS(ph)YK_
_SRELT(ph)NRS(ph)R_
_SRSREQS(ph)Y(ph)SR_
_VIFITEY(ph)MS(ph)SGSLK_
_Y(ph)LDFS(ph)SKEVK_
_Y(ph)LMS(ph)GVM(ox)APVK_
_AGLGS(ph)PERPPK_
_ASEDTTSGS(ph)PPKK_
_FLY(ph)SELM(ox)K_
_FVS(ph)RPPTPK_
_IPNYQLS(ph)PTKLPSINK_
_LECEIATY(ph)R_
_LFGSQEIM(ox)T(ph)EK_
_LMIS(ph)NPQEK_
_LRLS(ph)PSPTSQR_
_LY(ph)PSCLEESPWK_
_M(ox)PIVGLGTWKS(ph)PLGK_
_PLKPLS(ph)PLR_
_RIDIS(ph)PSTFR_
_SSM(ox)S(ph)GLHLVK_
_T(ph)PSIQPSLLPHAAPFAK_
_TVFPGAVPVLPAS(ph)PPPK_
_VPAPFS(ph)PPPSKPR_
_VPLAPITDPQQLQLS(ph)PLK_
_Y(ph)FGGTEDR_
_ADEASELACPT(ph)PK_
_AGDLLEDS(ph)PK_
_AGDLLEDS(ph)PKRPK_
_AITSLLGGGS(ph)PK_
_AKTQT(ph)PPVSPAPQPTEER_
_ALASEKS(ph)PTADAKPAPK_
_ALPSLNTGSSS(ph)PR_
_APQTSSS(ph)PPPVR_
_APS(ph)PPVEHPR_
_AQLEPVAS(ph)PAK_
_ASGQAFELILS(ph)PR_
_ATAPQTQHVS(ph)PM(ox)R_
_ATVTPS(ph)PVK_
_AVT(ph)PVPTK_
_CPIQLNEGVS(ph)FQDLDTAK_
_DEILPTT(ph)PISEQK_
_EESREPAPAS(ph)PAPAGVEIR_
_EGSVLDILKS(ph)PGFASPK_
_EKT(ph)PELPEPSVK_
_ENIKPNETS(ph)PSFSK_
_ES(ph)ESSPGQLSISLR_
_ES(ph)QALQEDSR_
_FLGS(ph)M(ox)DSLTSSEESSER_
_GEPAAAAAPEAGAS(ph)PVEK_
_GGPGSAVS(ph)PYPTFNPSSDVAALHK_
_GGVTGS(ph)PEASISGSK_
_GTPSQS(ph)PVVGR_
_GVGSGPHPPDTQQPS(ph)PSK_
_HELS(ph)PPQKR_
_HTGPNS(ph)PDTANDGFVR_
_IDIS(ph)PSTFRK_
_IGFPST(ph)SPAK_
_IGQQVDREPGDVAT(ph)PPR_
_IHRAS(ph)DPGLPAEEPK_
_IPS(ph)PNILK_
_ISSKS(ph)PGHMVILDQTK_
_KIS(ph)GTTALQEALK_
_KKS(ph)IPLSIK_
_KKS(ph)PIINESR_
_KLT(ph)PSAGK_
_KVPS(ph)FTFTPTVTYQR_
_KVVVS(ph)PTKK_
_LDGLVET(ph)PTGYIESLPR_
_LLDTM(ox)VDT(ph)FLQK_
_LNQPGT(ph)PTR_
_LSPS(ph)PTSQR_
_LSS(ph)PVLHR_
_M(ox)AGNFDS(ph)EER_
_MSFSS(ph)LKR_
_NFTKPQDGDVIAPLIT(ph)PQKK_
_NLS(ph)NEELTK_
_NPDT(ph)EQELEVLVR_
_NTGVSPASRPSPGTPT(ph)SPSNLTSGLK_
_PCSEET(ph)PAISPSKR_
_PCSEETPAIS(ph)PSKR_
_QERLS(ph)PEVAPPAHR_
_QPT(ph)PPFFGR_
_RASPS(ph)KPASAPASR_
_RGS(ph)LSNAGDPEIVK_
_RKPS(ph)VPDSASPADDSFVDPGER_
_RLS(ph)EQLAHTPTAFK_
_RLS(ph)THSPFR_
_RLT(ph)VSSLQESGLK_
_RPAS(ph)LSTAPSEK_
_RPMSS(ph)PEMK_
_RPPS(ph)PEPSTK_
_RRPS(ph)PQPSPR_
_SAAATS(ph)PAPHLVAGPLLGTVGK_
_SAESPTS(ph)PVTSETGSTFK_
_SETAPAAPAAPAPAEKT(ph)PVK_
_SGAQASST(ph)PLSPTR_
_S(ph)GSM(ox)DPSGAHPSVR_
_S(ph)GSMDPSGAHPSVR_
_SHISDQS(ph)PLSSK_
_SKS(ph)VKEDSNLTLQEK_
_SLS(ph)SPTVTLSAPLEGAK_
_STSAPQMS(ph)PGSSDNQSSSPQPAQQK_
_TAESQT(ph)PTPSATSFFSGK_
_TDSREDEIS(ph)PPPPNPVVK_
_TLS(ph)SSAQEDIIR_
_TQLWASEPGT(ph)PPLPTSLPSQNPILK_
_TQPDGTSVPGEPAS(ph)PISQR_
_TQT(ph)PPVSPAPQPTEER_
_TSQVGAASAPAKES(ph)PR_
_TVFS(ph)PTLPAAR_
_VHT(ph)PHLDR_
_VLS(ph)PTAAKPSPFEGK_
_VPS(ph)PTPAPK_
_VSAGEPGSHPS(ph)PAPR_
_VSIGNITLS(ph)PAISR_
_VSS(ph)PVFGATSSIK_
_YGM(ox)GT(ph)SVER_
_AAGGAPS(ph)PPPPVR_
_AAGGIILT(ph)ASHCPGGPGGEFGVK_
_AEEDEILNRS(ph)PR_
_AEVLGHKT(ph)PEPAPR_
_AFSTVPLT(ph)PVPR_
_AGGPTT(ph)PLSPTR_
_ALSAS(ph)HTDLAH_
_ALS(ph)PAELR_
_ANS(ph)FVGTAQYVSPELLTEK_
_APGAPPRS(ph)PPQR_
_AQGEPVAGHES(ph)PKIPYEK_
_AQVPGPLT(ph)PEM(ox)EAR_
_ART(ph)PSGPPAR_
_ASS(ph)LNFLNK_
_ATAPQTQHVS(ph)PMR_
_ATVTPS(ph)PVKGK_
_AVT(ph)PVPTKTEEVSNLK_
_AYT(ph)HQVVTR_
_CTIGMVGEGSIQSS(ph)R_
_DLDLS(ph)GNCLTTFPR_
_DQS(ph)EPLGR_
_DSSFTEVPRS(ph)PK_
_EFTGS(ph)PPSSATKK_
_EIPSATQS(ph)PISK_
_ELCLSSQS(ph)R_
_ELLT(ph)ENHQLK_
_ELPPS(ph)PEKK_
_ENLMTPS(ph)NM(ox)GVIFGPTLMR_
_EQT(ph)LSPTITSGLHNIAR_
_ERFS(ph)PPR_
_ESES(ph)SPGQLSISLR_
_EVIT(ph)EIEKK_
_FLQPGS(ph)PR_
_FT(ph)FSIEPVM(ox)R_
_GEPNVSY(ph)ICSR_
_GHVT(ph)PNLSR_
_GLAGPPAS(ph)PGK_
_GTDTQTPAVLS(ph)PSK_
_HLT(ph)PEPDIVASTK_
_HSCSGSS(ph)PPR_
_HVT(ph)QEFVSR_
_IACKS(ph)PPPESVDTPTSTK_
_IISVT(ph)PVK_
_IKT(ph)PPK_
_ISM(ox)QDVDLSLGS(ph)PK_
_KEVS(ph)PEVVR_
_KIPEPS(ph)PVTR_
_KIS(ph)PVK_
_KLS(ph)LSEGK_
_KPVTVSPTTPTS(ph)PTEGEAS_
_KSVS(ph)DVPR_
_KVEQLQQEYT(ph)EMK_
_LATKS(ph)SPVK_
_LCQEQLELLS(ph)EKK_
_LDNVPHT(ph)PSSYIETLPK_
_LDQPVSAPPS(ph)PR_
_LEEPPELNRQS(ph)PNPR_
_LENVLAS(ph)HSK_
_LGAGGGS(ph)PEKSPSAQELK_
_LGASNS(ph)PGQPNSVK_
_LGLHVTPSNVDQVST(ph)PPAAK_
_LLDT(ph)M(ox)VDTFLQK_
_LPAKLSIS(ph)K_
_LPTTDGAHPQPIS(ph)PIPGGVSSSGLSR_
_LSEEAECPNPST(ph)PSK_
_LVS(ph)PEPPPK_
_M(ox)APALSGANLTS(ph)PR_
_M(ox)APTCVS(ph)ALFK_
_M(ox)PLPSPTES(ph)R_
_M(ox)VLLT(ph)MIAR_
_NLKT(ph)LQK_
_NLNNSNLFS(ph)PVNR_
_QEASTGQSPEDHASLAPPLS(ph)PDHSSLEAK_
_QEAS(ph)VELRR_
_QILIACS(ph)PVSSVR_
_QLS(ph)SGVSEIR_
_QSHSGSIS(ph)PYPK_
_RDS(ph)LTGSSDLYK_
_RGS(ph)PVPPVPER_
_RIS(ph)QSQPVR_
_RLS(ph)PPSSSAASSYSFSDLNSTR_
_RNS(ph)CNVGGGGGGFK_
_RPAAAAAAGSAS(ph)PR_
_RSS(ph)PVPPVPER_
_RVPS(ph)PTPAPK_
_SAS(ph)ASHQADIK_
_SDKS(ph)PDLAPTPAPQSTPR_
_SEVQQPVHPKPLS(ph)PDSR_
_SGAHSS(ph)ASPPR_
_SGAQASSTPLS(ph)PTR_
_SLS(ph)PIIGK_
_S(ph)SSPAPADIAQTVQEDLR_
_SVS(ph)PTTEM(ox)VSNESVDYR_
_SVSSVLSSLT(ph)PAK_
_TLDSGTSEIVKS(ph)PR_
_TLS(ph)PTPSAEGYQDVR_
_TNT(ph)PVKEDWNVR_
_TPVQYSQQQNS(ph)PQK_
_TQT(ph)PPLGQTPQLGLK_
_TSS(ph)EDNLYLAVLR_
_TVHRS(ph)PLLLGAQR_
_TVT(ph)PASSAK_
_VAVAT(ph)PAKK_
_VGGS(ph)SVDLHR_
_VKPAS(ph)PVAQPK_
_VKS(ph)PGGPGSHVR_
_VQRPHSS(ph)PPR_
_VQTT(ph)PPPAVQGQK_
_VSDQNS(ph)PVLPK_
_VSLEPHQGPGT(ph)PESK_
_VT(ph)ESEIKR_
_WFT(ph)SQVIR_
_YDERPGPS(ph)PLPHR_
_YRS(ph)PYSGPK_
_AAVT(ph)PGKK_
_AAVVTS(ph)PPPTTAPHK_
_ADRS(ph)HK_
_AGETRFT(ph)DTR_
_AKT(ph)PVTLK_
_ALVAT(ph)PGKK_
_AVTIANS(ph)PSKPSEK_
_DVT(ph)PPPETEVVLIK_
_ES(ph)M(ox)PSLMEK_
_ET(ph)M(ox)YFAPSMK_
_GPVS(ph)PSVSFQPLAR_
_GS(ph)LLKVVLEDYLR_
_GVEPSPS(ph)PIKPGDIK_
_HAS(ph)PILPITEFSDIPR_
_HIDCAHVY(ph)QNENEVGVAIQEK_
_HIIHPT(ph)QKSK_
_HPPVLT(ph)PPDQEVIR_
_IGEGT(ph)YGVVYK_
_ILIVTQT(ph)PHYM(ox)R_
_KELELQY(ph)SELFLEVQK_
_KQIT(ph)M(ox)EELVR_
_KQIT(ph)MEELVR_
_KVAVAT(ph)PAKK_
_KVLS(ph)PTAAK_
_LPAKLS(ph)ISK_
_LTFDSSFS(ph)PNTGKK_
_M(ox)GQQIS(ph)DQTQLVINK_
_M(ox)PLDLS(ph)PLATPIIR_
_NKPLS(ph)PIK_
_PEAS(ph)M(ox)EVK_
_PGQHPAAS(ph)PTHPSAIR_
_PRPS(ph)ITK_
_QIT(ph)MEELVR_
_RLS(ph)IIGPTSR_
_RSS(ph)LLSLM(ox)TGK_
_RSS(ph)LLSLMTGK_
_RTECMESFPHSSS(ph)LR_
_SKPIPIMPAS(ph)PQK_
_S(ph)STPLPTISSSAENTR_
_TLNAETPKS(ph)SPLPAK_
_TLRDS(ph)PNVEAAHLAR_
_TVART(ph)PLGQR_
_VSM(ox)PDVELNLKS(ph)PK_
_VSMPDVELNLKS(ph)PK_
_VVVS(ph)PTKK_
_YHGHS(ph)M(ox)SDPGVSYR_
_Y(ph)VSELTLVR_
_AAVSM(ox)S(ph)VVLR_
_ALPQT(ph)PRPR_
_ASS(ph)HSSQTQGGGSVTK_
_ASS(ph)LEDLVLK_
_ASSLSESS(ph)PPK_
_DKEVS(ph)DDEAEEK_
_EALGLGPPAAQLT(ph)PPPAPVGLR_
_EIT(ph)HFDLRK_
_FLVNS(ph)FLK_
_FSVSKT(ph)EDK_
_GFTECEMTKSS(ph)PLK_
_GLYDGPVCEVSVT(ph)PK_
_HLAESESLLTS(ph)PPK_
_HS(ph)LSDPNM(ox)R_
_IELEGIS(ph)VM(ox)VMR_
_ILIVTQT(ph)PHYMR_
_ITSNCT(ph)IGLR_
_KWQSVEWGT(ph)LWK_
_LATTVAT(ph)M(ox)R_
_LGHGEEELET(ph)EKDFSR_
_LGS(ph)TSHFPQEK_
_LLAAGS(ph)PLAHSR_
_LPSGSGAAS(ph)PTGSAVDIR_
_LPSS(ph)PVYEDAASFK_
_LQAKES(ph)PQR_
_LQCELY(ph)PSR_
_LQQQT(ph)FNRLQFER_
_LSGLS(ph)FKR_
_LYFHLHY(ph)SR_
_NSAS(ph)VGIIQR_
_PEAPDQTLPPLNNFS(ph)VAECQLM(ox)K_
_PET(ph)VATQFK_
_PFSAPKPQT(ph)SPSPK_
_PPPPEVVS(ph)R_
_QLLLSTS(ph)M(ox)DR_
_RLS(ph)SFVTK_
_RQS(ph)FASLALR_
_RYS(ph)PPIQR_
_SFT(ph)PDHVVYAR_
_SLENPTPPFT(ph)PK_
_SSS(ph)PELVTHLK_
_T(ph)QKFYNQER_
_VDS(ph)TTCLFPVEEK_
_WIY(ph)ITK_
_ALS(ph)PVIPLIPR_
_ASSHS(ph)SQTQGGGSVTK_
_CLSEGQPPPS(ph)YNWTR_
_DLAVPAALT(ph)PR_
_EAALPPVS(ph)PLK_
_EALAEAALES(ph)PRPALVR_
_ELLHSVHPES(ph)PNLK_
_ELLSSDAMKEY(ph)NR_
_ELVEPLT(ph)PSGEAPNQALLR_
_ELVHVIT(ph)R_
_ENT(ph)AVAPCFAK_
_EYIPGQPPLSQSSDS(ph)SPTR_
_FITTGST(ph)DHVIR_
_FVAFSGEGQS(ph)LR_
_GY(ph)SLVSGGTDNHLVLVDLR_
_HALTS(ph)PSLGGQGR_
_HYGITS(ph)PISLAAPK_
_IDY(ph)IAG_
_ILLWDT(ph)RCPK_
_IPVEGPLS(ph)PSR_
_KEEIT(ph)KEEER_
_KVFS(ph)PVIR_
_LEAIIT(ph)PPPAK_
_LENWT(ph)PK_
_LFQLGPPS(ph)PVK_
_LLQEYCMET(ph)GGK_
_LPS(ph)GSGAASPTGSAVDIR_
_LQQLGEAHQAET(ph)EVLR_
_LSLEGDHST(ph)PPSAYGSVK_
_LSYLPATVEPAS(ph)PTPAHSLPR_
_LT(ph)YLGCMK_
_M(ox)PFLSISS(ph)PK_
_MPFLSISS(ph)PK_
_NDAASVLEAT(ph)VDYVK_
_SLS(ph)SSLQAPVVSTVGM(ox)QR_
_S(ph)LSSSLQAPVVSTVGM(ox)QR_
_S(ph)LTAHSLLPLAEK_
_SNSLQNTNIPHS(ph)AFISPK_
_S(ph)PVSTRPLPSASQK_
_SRTS(ph)PVTR_
_STAQQELDGKPAS(ph)PTPVIVASHTANK_
_SVIEPLPVT(ph)PTR_
_SVVS(ph)FDKVK_
_TAPTLS(ph)PEHWK_
_TERDFHS(ph)WMK_
_TFS(ph)LTEVR_
_T(ph)M(ox)QLSLSR_
_TRS(ph)LSSLR_
_VKQYYEVPIT(ph)M(ox)K_
_VVVHHVTVS(ph)PLR_
_WMDS(ph)LLPFTK_
_YPFELIMAAY(ph)ER_
_Y(ph)SHYNER_
_ALLT(ph)PVAIAAGR_
_ALSSGGSITS(ph)PPLSPALPK_
_DQPAFTPSGILT(ph)PHALGSR_
_ENYET(ph)LVSVEPGR_
_GAILSEEELAAMS(ph)PTAAAVAK_
_ISKPGAVS(ph)TPVK_
_ISNIEDLPPLYT(ph)LNK_
_ITPEEM(ox)S(ph)LK_
_KAPAPPVLS(ph)PK_
_LGFSLT(ph)PSK_
_LLSIS(ph)GKR_
_LNHVAAGLVS(ph)PSLK_
_LSGFS(ph)FKK_
_LSLEGDHSTPPSAYGS(ph)VK_
_M(ox)FQS(ph)ASALEAHQK_
_MIVVLSPDY(ph)VTEK_
_NNVFM(ox)T(ph)SALVQSSVDIK_
_RAGDLLEDS(ph)PK_
_RPS(ph)QGPPAR_
_RVPS(ph)QNQK_
_SAPAS(ph)PTHPGLMSPR_
_S(ph)FCM(ox)FSHK_
_SST(ph)PPGESYFGVSSLQLK_
_US(ph)TEIPPYVM(ox)K_
_VKT(ph)PQPK_
_VTENLASLT(ph)PK_
_APLKPYPVSPS(ph)DK_
_APS(ph)VANVGSHCDLSLK_
_AQTAPTKT(ph)SPR_
_DAVYTLS(ph)AMTSGIR_
_DNTMNVIHM(ox)LENFT(ph)FR_
_DRT(ph)PPLLYR_
_EGDSIT(ph)YAIENGDPQR_
_ENGNGPM(ox)T(ph)VDK_
_ET(ph)EASSINLSVYEPFK_
_FIEYIDEALEKS(ph)K_
_FKAEAPLPS(ph)PK_
_FVAFSGEGQS(ph)LRK_
_IEFVIT(ph)LQIEEPK_
_IEVIEIMT(ph)DRGSGK_
_KET(ph)PPPLVPPAAR_
_KIELFS(ph)MK_
_KLS(ph)PTEPK_
_KPALPVS(ph)PAAR_
_KPIETGS(ph)PK_
_KQS(ph)LPATSIPTPASFK_
_PYM(ox)SWQCHS(ph)K_
_RVS(ph)LSEIGFGK_
_SINLVSHSM(ox)MAFDT(ph)R_
_S(ph)STPPGESYFGVSSLQLK_
_VAAETQS(ph)PSLFGSTK_
_YSPSQNS(ph)PIHHIPSR_
_AALLKAS(ph)PK_
_AHT(ph)PTPGIYM(ox)GR_
_AHT(ph)PTPGIYMGR_
_AIT(ph)PPVASPVGR_
_ALLSLRS(ph)PK_
_ASAVSELS(ph)PR_
_AVGM(ox)PS(ph)PVSPK_
_AVPS(ph)PPPPPIVK_
_DLY(ph)DAGVK_
_DT(ph)LRTPPR_
_EFVDFSYT(ph)VGYK_
_ESDQTLAALLS(ph)PK_
_ETPHS(ph)PGVEDAPIAK_
_FCCNCTYGNPALLY(ph)K_
_GC(ph)ILDSLDQGALHQIIQ_
_GET(ph)LPTEAR_
_GILRTPDT(ph)IR_
_GTPLIS(ph)PLIK_
_GYYSPYSVSGSGSTAGS(ph)R_
_IHS(ph)PIIR_
_IRTSPT(ph)FR_
_IT(ph)LPLPPYTR_
_KPSPQPS(ph)SPR_
_LAAPSVSHVS(ph)PR_
_LAAPS(ph)VSHVSPR_
_LALT(ph)EEQQLM(ox)FEK_
_LKATVTPS(ph)PVK_
_LNQS(ph)PSLAPVKR_
_LPAYLAT(ph)SPIPTEDQFFK_
_LQGSGVSLAS(ph)KK_
_LRS(ph)PPEALVQGR_
_LSSTLITEM(ox)S(ph)SGRLEEL_
_MLCVSGFTSNLY(ph)SSK_
_PGSSIPGSPGHT(ph)IYAK_
_PIT(ph)PVYTVAPNVQR_
_PLPS(ph)PPK_
_RTS(ph)PQVLGSILK_
_SFAPST(ph)PLTGR_
_SGFGEISS(ph)PVIR_
_SKESVPEFPLS(ph)PPK_
_SLS(ph)PGGAALGYR_
_SLSS(ph)SLQAPVVSTVGMQR_
_S(ph)LSSSLQAPVVSTVGMQR_
_S(ph)PMLLMRR_
_SSPNPFVGS(ph)PPK_
_SSS(ph)FVLPK_
_STVISGCIILQLY(ph)PWKYISR_
_TAS(ph)PPPPPK_
_T(ph)FIVGAQMNVKEFK_
_T(ph)GDVPSGK_
_TGQAGSLSGS(ph)PKPFSPQLSAPITTK_
_T(ph)GSYGALAEITASK_
_T(ph)M(ox)QDIVYK_
_TPVSGSLKS(ph)PVPR_
_VGET(ph)PLM(ox)NADSILAVK_
_VGS(ph)LDNVGHLPAGGAVK_
_VKPET(ph)PPR_
_VLHS(ph)PPAVR_
_VNQIGSVTEAIQAS(ph)R_
_YVGFGNT(ph)PPPQK_
_AAVGQES(ph)PGGLEAGNAK_
_AELPGSSS(ph)PLLAQPR_
_AFLAELEQNS(ph)PK_
_AGAAS(ph)PLNSPLSSAVPSLGK_
_AGAPGALS(ph)PSYDGGLHGLQSK_
_AGM(ox)SSNQSISS(ph)PVLDAVPR_
_AGMSSNQSIS(ph)SPVLDAVPR_
_AGMSSNQSISS(ph)PVLDAVPR_
_AHFNAM(ox)FQPSS(ph)PTR_
_AHFNAM(ox)FQPS(ph)SPTR_
_AHFNAMFQPSS(ph)PTR_
_AHFNAMFQPS(ph)SPTR_
_ALSGGGSVAS(ph)PPPSPAM(ox)PK_
_ALSTGLDYS(ph)PPSAPR_
_APSAS(ph)PLALHASR_
_AQSLVIS(ph)PPAPSPR_
_ASDPQS(ph)PPQVSR_
_ASPDQNAS(ph)THTPQSSVK_
_ATDIPASAS(ph)PPPVAGVPFFK_
_AVS(ph)LDSPVSVGSSPPVK_
_AVSTVVVTTAPS(ph)PK_
_AYT(ph)PVVVTQWYR_
_CLVAGLLS(ph)PR_
_CRS(ph)PGM(ox)LEPLGSSR_
_CRS(ph)PGMLEPLGSSR_
_DILIQY(ph)DR_
_DIPRT(ph)PSR_
_DVTNFTVGGFAPM(ox)S(ph)PR_
_DYSTVSAS(ph)PTALSTLK_
_EATAQKPTGSVGSTVTT(ph)PPPLVR_
_EGVLYAGS(ph)GTAPDLSGNKK_
_ELMY(ph)MGYK_
_ELPPAAAIGATSLVAAPHSSS(ph)SSPSK_
_ELSESVQQQSTPVPLIS(ph)PKR_
_ELSLKAS(ph)PLR_
_EQTLHT(ph)PVM(ox)M(ox)QTPQLTSTIM(ox)R_
_ET(ph)PQESRQDMIVR_
_EVLDAS(ph)VK_
_FALSLS(ph)PGAHQK_
_FDLSHGS(ph)PQM(ox)VR_
_FGQAATM(ox)EGIGAIGGT(ph)PPAFNR_
_FGQAATMEGIGAIGGT(ph)PPAFNR_
_FLSHST(ph)DSLNK_
_GAPPGS(ph)PEPPALLAAPLAAGACPGGR_
_GIAPAS(ph)PM(ox)LGNASNPNK_
_GIAPAS(ph)PMLGNASNPNK_
_GLPTGDS(ph)PLGPM(ox)THR_
_GLSPAM(ox)S(ph)PALQR_
_GNVVPS(ph)PLPTRR_
_GNVVPSPLPT(ph)RR_
_GRLS(ph)PVPVPR_
_GSEGYLAATYPTVGQTS(ph)PR_
_GSLAS(ph)LDSLRK_
_GSVPLSSSPPAT(ph)HFPDETEITNPVPK_
_GTQLSVVDFLPT(ph)TAQPTK_
_HPPLYQAGLTPPLS(ph)PPK_
_IDFTPVS(ph)PAPSPTR_
_IDSNIS(ph)PK_
_IISVT(ph)PVKNIDPVK_
_ILYT(ph)TSLTR_
_ISGPECT(ph)TPK_
_ISSTLYQAAAPVLT(ph)PAK_
_IST(ph)PLTGVR_
_KPS(ph)ISITTESLK_
_KQITTS(ph)PITVR_
_LEEVLAIRT(ph)IHEK_
_LEVFT(ph)TPKK_
_LEVTEIVKPS(ph)PK_
_LFVLLPEQS(ph)PVSYSK_
_LLILT(ph)QAER_
_LLPSAPQTLPDGPLAS(ph)PAR_
_LNDS(ph)PTLK_
_LNLTS(ph)PKR_
_LNS(ph)PLLSNK_
_LQAT(ph)VRVR_
_LQHST(ph)SILR_
_LQPT(ph)PPIPAPAPK_
_LQQQAALS(ph)PTTAPAVSSVSK_
_LQS(ph)AGSAM(ox)PTSSSFK_
_LS(ph)PTSLVHPVM(ox)STLPELSCK_
_LTVENS(ph)PK_
_M(ox)AGNEALS(ph)PTSPFR_
_M(ox)LQALS(ph)PK_
_M(ox)PTFS(ph)TPGAK_
_MPTFS(ph)TPGAK_
_MVSDLVIILNY(ph)DR_
_NATLAWDSSHSSIQNS(ph)PK_
_NHVFT(ph)VTMENLK_
_NQLVT(ph)PEPTSR_
_NQSPTEAEKPASSSLPS(ph)SPPPQLLTR_
_NSDLLT(ph)SPDVGLLK_
_PFNT(ph)YPR_
_PKPSS(ph)SPVIFAGGQDR_
_PNQQT(ph)VLLP_
_PTLSALPSPVVAS(ph)GGNMTLR_
_RAPS(ph)VANVGSHCDLSLK_
_REPGYT(ph)PPGAGNQNPPGM(ox)YPVTGPK_
_RFS(ph)ADAAR_
_RIDIS(ph)PSTLR_
_RIPYAPS(ph)GEIPK_
_RLS(ph)ITSLTGK_
_RLS(ph)LPADIR_
_RLSSTS(ph)LASGHSVR_
_RSTS(ph)PIIGSPPVR_
_RTS(ph)FSFQK_
_SAAVETASLS(ph)PSLVPAR_
_SEDM(ox)PFS(ph)PK_
_SESAPTLHPYSPLS(ph)PK_
_SLKLS(ph)PVQK_
_SLS(ph)QGSTNATVLDVAQTGGHK_
_SLSSS(ph)LQAPVVSTVGM(ox)QR_
_SM(ox)GTGDTPGLEVPS(ph)SPLRK_
_SM(ox)GTGDTPGLEVPSS(ph)PLRK_
_SMGTGDTPGLEVPS(ph)SPLRK_
_SPS(ph)LGSDLTFATR_
_SPS(ph)VAAM(ox)ASPQLCR_
_S(ph)PTGPSNSFLANM(ox)GGTVAHK_
_S(ph)PTM(ox)EQAVQTASAHLPAPAAVGR_
_SRLT(ph)PVSPESSSTEEK_
_TPAAAAAM(ox)NLAS(ph)PR_
_VGDVT(ph)PQVK_
_VIKT(ph)PVVK_
_VLGAGGAGPAPAT(ph)PSR_
_VLS(ph)PPGRR_
_VLT(ph)IDPTEFK_
_VQPQWS(ph)PPAGTQPCR_
_VQS(ph)PKPITGGLGAFTK_
_VTFSVS(ph)PIEATEK_
_VVPQQITHTS(ph)PR_
_VYNLLT(ph)PDSK_
_Y(ph)GPAELGLVYPHLQR_
_YLLGDAPVS(ph)PSSQK_
_YLSFT(ph)PPEK_
_Y(ph)TELVEEK_
_APLQLGPS(ph)SSIKEK_
_AVPDT(ph)LM(ox)RGSAQR_
_CPGESLINPGFKS(ph)K_
_ELVGPPLAETVFT(ph)PK_
_ERS(ph)PAELYK_
_EWY(ph)YEVIIVR_
_FQPLVPAGVS(ph)SSQM(ox)K_
_FT(ph)LAEVASLNDIQPTYR_
_IDASSY(ph)FVEPETK_
_IDIS(ph)PSTFR_
_IDISPST(ph)LRK_
_IVTLFS(ph)DFKPYK_
_IY(ph)NMEM(ox)AR_
_LAS(ph)M(ox)SNDFK_
_LGGLRPES(ph)PESLTSVSR_
_LGNPYCS(ph)PTLVR_
_MLLTVY(ph)CVR_
_M(ox)TVVQS(ph)YLGDTHYK_
_M(ox)Y(ph)DLLLLK_
_NLSLGLQT(ph)LR_
_PT(ph)TAYIYITEENK_
_QEALQHLIRS(ph)SGK_
_QVGY(ph)EDQWLQLLR_
_RPHT(ph)PTPGIYMGR_
_SAM(ox)PFTAS(ph)PASSTTAR_
_SLGNILQAKPTSS(ph)PAK_
_TPHVQAVQGPLGS(ph)PPK_
_VVSISSEHLEPIT(ph)PTK_
_YCQHRCVNLPGS(ph)FR_
_YLS(ph)FTPPEK_
_AEGS(ph)PNQGKK_
_APVAPTPPT(ph)LIK_
_ATSAVVIT(ph)STSGDSIVSTSMPR_
_AYGVPVKPM(ox)T(ph)PK_
_AYGVPVKPMT(ph)PK_
_CQVT(ph)ELMLVDM(ox)K_
_DGEFT(ph)LTTLK_
_IEGM(ox)T(ph)QSLR_
_IEPSINHILS(ph)TR_
_IT(ph)PEEMSLK_
_KEKEISET(ph)SESLK_
_KEQVS(ph)EAIK_
_KFDEVVS(ph)LCK_
_KMININILS(ph)VCK_
_KQNPS(ph)SGAR_
_KY(ph)AEER_
_LCDVT(ph)TGLK_
_LLLQLT(ph)YLDSCYWDHK_
_LPLVT(ph)PHTQCR_
_MAS(ph)MRVVKELEDLQK_
_MEY(ph)VLEVK_
_M(ox)GLLS(ph)PSGIGGVSPR_
_M(ox)SS(ph)HAQPLK_
_NADS(ph)ELM(ox)PPPPER_
_NKNLQEALIDT(ph)EK_
_NLNLVSS(ph)TASIK_
_QFT(ph)VRK_
_RIDFTPVS(ph)PAPSPTR_
_SPVVSGDT(ph)SPR_
_TPS(ph)FLKK_
_TSS(ph)LDADLR_
_VKT(ph)PEM(ox)IIQKPK_
_VQFNLQFT(ph)K_
_DEYS(ph)ERDENVLK_
_EEPVS(ph)SGPEEAVGK_
_FQS(ph)EEQQQTEDELQDK_
_IEDVGS(ph)DEEDDSGKDKK_
_KAEGEPQEES(ph)PLK_
_LM(ox)EDMDT(ph)VIK_
_QGQSFHY(ph)GQPDR_
_RMSSGT(ph)EECGEDR_
_SEAEEGEVRT(ph)PTK_

## Sheet: Table S2
Table S2. Putative phosphorylation motifs discovered by Motif-x around the p-sites in the MHCC97-H cell line.
Motif	Motif Score	Foreground Matches	Foreground Size	Background Matches	Background Size	Fold Increase
Motif of pS
.....P.SP......	32	408	5108	10023	1100344	8.77
.......SP.K....	32	222	4700	3121	1090321	16.5
....R..SP......	32	204	4478	4642	1087200	10.67
.......SP....K.	32	144	4274	2867	1082558	12.72
.......SP.....K	32	120	4130	2552	1079691	12.29
.......SP...K..	28.64	102	4010	2406	1077139	11.39
.......SP..K...	26.61	90	3908	2297	1074733	10.78
....G..SP......	25.34	138	3818	4616	1072436	8.4
....R..S.S.....	32	226	3680	7558	1067820	8.68
.......SP...R..	24.45	99	3454	3273	1060262	9.28
.K.....SP......	22.15	58	3355	1886	1056989	9.69
.......SP......	16	691	3297	46960	1055103	4.71
....RR.S.......	32	133	2606	4379	1008143	11.75
.......SSP.....	32	189	2473	9975	1003764	7.69
....RS.S.......	32	127	2284	5428	993789	10.18
......RS.S.....	32	76	2157	5898	988361	5.9
....RK.S.......	32	91	2081	3022	982463	14.22
K......SD.E....	38.19	22	1990	270	979441	40.1
.......S.SP....	28.21	65	1968	7396	979171	4.37
.......SD.E....	32	90	1903	4284	971775	10.73
....RT.S.......	27.65	55	1813	2979	967491	9.85
.......SE.E....	32	69	1758	6113	964512	6.19
....R..S.G.....	22.31	38	1689	2914	958399	7.4
....KR.S.......	25.29	37	1651	3029	955485	7.07
....R..S.T.....	23.59	31	1614	2106	952456	8.69
....R..S.......	16	132	1583	31729	950350	2.5
..R..S.S.......	23.02	40	1451	5828	918621	4.35
....K..S.......	16	160	1411	48450	912793	2.14
..R....S.S.....	16.39	26	1251	3735	864343	4.81
.....S.S.......	10.45	200	1225	88001	860608	1.6
.R..S..S.......	16.63	31	1025	5512	772607	4.24
.....R.S.......	10.5	114	994	45628	767095	1.93
...K...S.......	7.68	85	880	36698	721467	1.9
.......S.D.....	7.78	75	795	32238	684769	2
....S..S.......	7.76	129	720	71391	652531	1.64
.......S.S.....	6.56	90	591	51119	581140	1.73
Motif of pT
.......TPP.....	32	97	995	4245	692063	15.89
.......TP.K....	31.65	52	898	2013	687818	19.79
.....P.TP......	24.66	63	846	4854	685805	10.52
.......TP......	16	192	783	37827	680951	4.41
......PTSP.....	38.06	22	591	593	643124	40.37
.......TSP.....	29.64	37	569	4224	642531	9.89
......RT.S.....	26.78	30	532	3444	638307	10.45
.......T.SP....	20.36	27	502	4158	634863	8.21
.....SPT.......	16.66	24	475	4096	630705	7.78
.......TS......	7.77	77	451	55104	626609	1.94
.......TT......	6.81	54	374	38760	571505	2.13

## Sheet: Table S3
Table S3. The site-specific kinase-substrate relations (ssKSRs) in the MHCC97-H cell line predicted by iGPS 1.0.
ID	Position	Code	Peptide	Matched ID	Gene Name	Kinase ID	Kinase Name	Interaction	Predictor	Score	Cutoff
A5YM69	8	S	SGQTRYYSPCEEHPA	Q12774	ARHGEF5	P31749	AKT1	String	AGC/AKT	1.81	1.64
A5YM69	8	S	SGQTRYYSPCEEHPA	Q12774	ARHGEF5	Q00535	CDK5	String	CMGC/CDK	1.65	1.11
A5YM69	8	S	SGQTRYYSPCEEHPA	Q12774	ARHGEF5	Q00534	CDK6	String	CMGC/CDK	1.65	1.11
A5YM69	8	S	SGQTRYYSPCEEHPA	Q12774	ARHGEF5	O94921	PFTAIRE1	String	CMGC/CDK	1.65	1.11
H3BRH4	8	S	EGVDGGQSPRAGHDG	O00418	eEF2K	P53778	p38g	Exp.&String	CMGC/MAPK	2.34	1.17
H3BRH4	8	S	EGVDGGQSPRAGHDG	O00418	eEF2K	P27361	Erk1	String	CMGC/MAPK	2.34	1.17
H3BRH4	8	S	EGVDGGQSPRAGHDG	O00418	eEF2K	Q13164	Erk5	String	CMGC/MAPK	2.34	1.17
H3BRH4	8	S	EGVDGGQSPRAGHDG	O00418	eEF2K	Q16659	Erk3	String	CMGC/MAPK	2.34	1.17
H3BRH4	8	S	EGVDGGQSPRAGHDG	O00418	eEF2K	A8MTD8	JNK3	String	CMGC/MAPK	2.34	1.17
H3BRH4	8	S	EGVDGGQSPRAGHDG	O00418	eEF2K	D3DX92	JNK1	String	CMGC/MAPK	2.34	1.17
H3BRH4	8	S	EGVDGGQSPRAGHDG	O00418	eEF2K	Q15759	p38b	Exp.&String	CMGC/MAPK	2.34	1.17
H3BRH4	8	S	EGVDGGQSPRAGHDG	O00418	eEF2K	P45984	JNK2	Exp.	CMGC/MAPK	2.34	1.17
H3BRH4	8	S	EGVDGGQSPRAGHDG	O00418	eEF2K	P28482	Erk2	String	CMGC/MAPK	2.34	1.17
H3BRH4	8	S	EGVDGGQSPRAGHDG	O00418	eEF2K	Q16539	p38a	Exp.&String	CMGC/MAPK	2.34	1.17
H3BRH4	8	S	EGVDGGQSPRAGHDG	O00418	eEF2K	O15264	p38d	Exp.&String	CMGC/MAPK	2.34	1.17
H3BRH4	8	S	EGVDGGQSPRAGHDG	O00418	eEF2K	P06493	CDC2	String	CMGC/CDK/CDC2	1.59	1.58
H3BRH4	8	S	EGVDGGQSPRAGHDG	O00418	eEF2K	P24941	CDK2	String	CMGC/CDK/CDC2	1.59	1.58
F5H2B0	8	S	SADAGSFSPTPGQIG	O00443	PIK3C2A	P50750	CDK9	String	CMGC/CDK	1.91	1.11
F5H2B0	8	S	SADAGSFSPTPGQIG	O00443	PIK3C2A	Q8IZL9	CCRK	String	CMGC/CDK	1.91	1.11
F5H2B0	8	S	SADAGSFSPTPGQIG	O00443	PIK3C2A	B4DK03	PCTAIRE3	String	CMGC/CDK	1.91	1.11
F5H2B0	8	S	SADAGSFSPTPGQIG	O00443	PIK3C2A	P50613	CDK7	String	CMGC/CDK	1.91	1.11
F5H2B0	8	S	SADAGSFSPTPGQIG	O00443	PIK3C2A	Q14004	CHED	String	CMGC/CDK	1.91	1.11
F5H2B0	8	S	SADAGSFSPTPGQIG	O00443	PIK3C2A	Q96Q40	PFTAIRE2	String	CMGC/CDK	1.91	1.11
F5H2B0	8	S	SADAGSFSPTPGQIG	O00443	PIK3C2A	Q9NYV4	CRK7	String	CMGC/CDK	1.91	1.11
F5H2B0	8	S	SADAGSFSPTPGQIG	O00443	PIK3C2A	P11802	CDK4	String	CMGC/CDK	1.91	1.11
F5H2B0	8	S	SADAGSFSPTPGQIG	O00443	PIK3C2A	Q00537	PCTAIRE2	String	CMGC/CDK	1.91	1.11
F5H2B0	8	S	SADAGSFSPTPGQIG	O00443	PIK3C2A	Q00536	PCTAIRE1	String	CMGC/CDK	1.91	1.11
F5H2B0	8	S	SADAGSFSPTPGQIG	O00443	PIK3C2A	Q00535	CDK5	String	CMGC/CDK	1.91	1.11
F5H2B0	8	S	SADAGSFSPTPGQIG	O00443	PIK3C2A	Q00534	CDK6	String	CMGC/CDK	1.91	1.11
F5H2B0	8	S	SADAGSFSPTPGQIG	O00443	PIK3C2A	O94921	PFTAIRE1	String	CMGC/CDK	1.91	1.11
F5H2B0	8	S	SADAGSFSPTPGQIG	O00443	PIK3C2A	P27361	Erk1	String	CMGC/MAPK	1.93	1.17
F5H2B0	8	S	SADAGSFSPTPGQIG	O00443	PIK3C2A	Q13164	Erk5	String	CMGC/MAPK	1.93	1.17
F5H2B0	8	S	SADAGSFSPTPGQIG	O00443	PIK3C2A	Q16659	Erk3	String	CMGC/MAPK	1.93	1.17
F5H2B0	8	S	SADAGSFSPTPGQIG	O00443	PIK3C2A	A8MTD8	JNK3	String	CMGC/MAPK	1.93	1.17
F5H2B0	8	S	SADAGSFSPTPGQIG	O00443	PIK3C2A	D3DX92	JNK1	String	CMGC/MAPK	1.93	1.17
F5H2B0	8	S	SADAGSFSPTPGQIG	O00443	PIK3C2A	Q15759	p38b	String	CMGC/MAPK	1.93	1.17
F5H2B0	8	S	SADAGSFSPTPGQIG	O00443	PIK3C2A	P45984	JNK2	String	CMGC/MAPK	1.93	1.17
F5H2B0	8	S	SADAGSFSPTPGQIG	O00443	PIK3C2A	P28482	Erk2	String	CMGC/MAPK	1.93	1.17
F5H2B0	8	S	SADAGSFSPTPGQIG	O00443	PIK3C2A	Q16539	p38a	String	CMGC/MAPK	1.93	1.17
F5H2B0	8	S	SADAGSFSPTPGQIG	O00443	PIK3C2A	O15264	p38d	String	CMGC/MAPK	1.93	1.17
F5H2B0	8	S	SADAGSFSPTPGQIG	O00443	PIK3C2A	P24941	CDK2	String	CMGC/CDK/CDC2	2.46	1.58
O14646	8	S	GAEFWKSSPSILAVQ	O14646	CHD1	P50750	CDK9	String	CMGC/CDK	1.24	1.11
O14646	8	S	GAEFWKSSPSILAVQ	O14646	CHD1	Q8IZL9	CCRK	String	CMGC/CDK	1.24	1.11
O14646	8	S	GAEFWKSSPSILAVQ	O14646	CHD1	B4DK03	PCTAIRE3	String	CMGC/CDK	1.24	1.11
O14646	8	S	GAEFWKSSPSILAVQ	O14646	CHD1	P50613	CDK7	String	CMGC/CDK	1.24	1.11
O14646	8	S	GAEFWKSSPSILAVQ	O14646	CHD1	Q14004	CHED	String	CMGC/CDK	1.24	1.11
O14646	8	S	GAEFWKSSPSILAVQ	O14646	CHD1	Q96Q40	PFTAIRE2	String	CMGC/CDK	1.24	1.11
O14646	8	S	GAEFWKSSPSILAVQ	O14646	CHD1	Q9NYV4	CRK7	String	CMGC/CDK	1.24	1.11
O14646	8	S	GAEFWKSSPSILAVQ	O14646	CHD1	P11802	CDK4	String	CMGC/CDK	1.24	1.11
O14646	8	S	GAEFWKSSPSILAVQ	O14646	CHD1	Q00537	PCTAIRE2	String	CMGC/CDK	1.24	1.11
O14646	8	S	GAEFWKSSPSILAVQ	O14646	CHD1	Q00536	PCTAIRE1	String	CMGC/CDK	1.24	1.11
O14646	8	S	GAEFWKSSPSILAVQ	O14646	CHD1	Q00535	CDK5	String	CMGC/CDK	1.24	1.11
O14646	8	S	GAEFWKSSPSILAVQ	O14646	CHD1	Q00534	CDK6	String	CMGC/CDK	1.24	1.11
O14646	8	S	GAEFWKSSPSILAVQ	O14646	CHD1	O94921	PFTAIRE1	String	CMGC/CDK	1.24	1.11
O14828	8	S	LQPSRKLSPTEPKNY	O14828	SCAMP3	P49760	CLK2	String	CMGC	3.02	1.46
O14828	8	S	LQPSRKLSPTEPKNY	O14828	SCAMP3	B4DFW7	CLK1	String	CMGC	3.02	1.46
O14828	8	S	LQPSRKLSPTEPKNY	O14828	SCAMP3	Q2NME9	CDKL4	String	CMGC	3.02	1.46
O14828	8	S	LQPSRKLSPTEPKNY	O14828	SCAMP3	Q9UPE1	MSSK1	String	CMGC	3.02	1.46
O14828	8	S	LQPSRKLSPTEPKNY	O14828	SCAMP3	Q00532	CDKL1	String	CMGC	3.02	1.46
O14828	8	S	LQPSRKLSPTEPKNY	O14828	SCAMP3	Q9UPZ9	ICK	String	CMGC	3.02	1.46
I3L1P5	8	Y	VRVCEPCYEQLNRKA	O14964	HGS	P07332	FES	String	TK/Fer/Fer	7	3.76
I3L1P5	8	Y	VRVCEPCYEQLNRKA	O14964	HGS	P16591	FER	String	TK/Fer/Fer	7	3.76
F8VZN8	8	S	EEERKDESPATWRLG	O14974	PPP1R12A	P50613	CDK7	String	CMGC/CDK	1.92	1.11
F8VZN8	8	S	EEERKDESPATWRLG	O14974	PPP1R12A	Q14004	CHED	String	CMGC/CDK	1.92	1.11
F8VZN8	8	S	EEERKDESPATWRLG	O14974	PPP1R12A	Q96Q40	PFTAIRE2	String	CMGC/CDK	1.92	1.11
F8VZN8	8	S	EEERKDESPATWRLG	O14974	PPP1R12A	Q9NYV4	CRK7	String	CMGC/CDK	1.92	1.11
F8VZN8	8	S	EEERKDESPATWRLG	O14974	PPP1R12A	P11802	CDK4	String	CMGC/CDK	1.92	1.11
F8VZN8	8	S	EEERKDESPATWRLG	O14974	PPP1R12A	Q00537	PCTAIRE2	String	CMGC/CDK	1.92	1.11
F8VZN8	8	S	EEERKDESPATWRLG	O14974	PPP1R12A	Q00536	PCTAIRE1	String	CMGC/CDK	1.92	1.11
F8VZN8	8	S	EEERKDESPATWRLG	O14974	PPP1R12A	Q00535	CDK5	String	CMGC/CDK	1.92	1.11
F8VZN8	8	S	EEERKDESPATWRLG	O14974	PPP1R12A	Q00534	CDK6	String	CMGC/CDK	1.92	1.11
F8VZN8	8	S	EEERKDESPATWRLG	O14974	PPP1R12A	O94921	PFTAIRE1	String	CMGC/CDK	1.92	1.11
F8VZN8	8	S	EEERKDESPATWRLG	O14974	PPP1R12A	P28482	Erk2	String	CMGC/MAPK	1.83	1.17
F8VZN8	8	S	EEERKDESPATWRLG	O14974	PPP1R12A	Q16539	p38a	String	CMGC/MAPK	1.83	1.17
F8VZN8	8	S	EEERKDESPATWRLG	O14974	PPP1R12A	O15264	p38d	String	CMGC/MAPK	1.83	1.17
F8W8P9	8	T	ENPTPPFTPKMGRRS	Q6PFW2	ARHGEF11	P53778	p38g	String	CMGC/MAPK	3.63	1.17
F8W8P9	8	T	ENPTPPFTPKMGRRS	Q6PFW2	ARHGEF11	P27361	Erk1	String	CMGC/MAPK	3.63	1.17
F8W8P9	8	T	ENPTPPFTPKMGRRS	Q6PFW2	ARHGEF11	Q13164	Erk5	String	CMGC/MAPK	3.63	1.17
F8W8P9	8	T	ENPTPPFTPKMGRRS	Q6PFW2	ARHGEF11	Q16659	Erk3	String	CMGC/MAPK	3.63	1.17
F8W8P9	8	T	ENPTPPFTPKMGRRS	Q6PFW2	ARHGEF11	A8MTD8	JNK3	String	CMGC/MAPK	3.63	1.17
F8W8P9	8	T	ENPTPPFTPKMGRRS	Q6PFW2	ARHGEF11	D3DX92	JNK1	String	CMGC/MAPK	3.63	1.17
F8W8P9	8	T	ENPTPPFTPKMGRRS	Q6PFW2	ARHGEF11	Q15759	p38b	String	CMGC/MAPK	3.63	1.17
F8W8P9	8	T	ENPTPPFTPKMGRRS	Q6PFW2	ARHGEF11	P45984	JNK2	String	CMGC/MAPK	3.63	1.17
F8W8P9	8	T	ENPTPPFTPKMGRRS	Q6PFW2	ARHGEF11	P28482	Erk2	String	CMGC/MAPK	3.63	1.17
F8W8P9	8	T	ENPTPPFTPKMGRRS	Q6PFW2	ARHGEF11	Q16539	p38a	String	CMGC/MAPK	3.63	1.17
F8W8P9	8	T	ENPTPPFTPKMGRRS	Q6PFW2	ARHGEF11	O15264	p38d	String	CMGC/MAPK	3.63	1.17
F8W8P9	8	T	TRSLENPTPPFTPKM	Q6PFW2	ARHGEF11	P53778	p38g	String	CMGC/MAPK	1.85	1.17
F8W8P9	8	T	TRSLENPTPPFTPKM	Q6PFW2	ARHGEF11	P27361	Erk1	String	CMGC/MAPK	1.85	1.17
F8W8P9	8	T	TRSLENPTPPFTPKM	Q6PFW2	ARHGEF11	Q13164	Erk5	String	CMGC/MAPK	1.85	1.17
F8W8P9	8	T	TRSLENPTPPFTPKM	Q6PFW2	ARHGEF11	Q16659	Erk3	String	CMGC/MAPK	1.85	1.17
F8W8P9	8	T	TRSLENPTPPFTPKM	Q6PFW2	ARHGEF11	A8MTD8	JNK3	String	CMGC/MAPK	1.85	1.17
F8W8P9	8	T	TRSLENPTPPFTPKM	Q6PFW2	ARHGEF11	D3DX92	JNK1	String	CMGC/MAPK	1.85	1.17
F8W8P9	8	T	TRSLENPTPPFTPKM	Q6PFW2	ARHGEF11	Q15759	p38b	String	CMGC/MAPK	1.85	1.17
F8W8P9	8	T	TRSLENPTPPFTPKM	Q6PFW2	ARHGEF11	P45984	JNK2	String	CMGC/MAPK	1.85	1.17
F8W8P9	8	T	TRSLENPTPPFTPKM	Q6PFW2	ARHGEF11	P28482	Erk2	String	CMGC/MAPK	1.85	1.17
F8W8P9	8	T	TRSLENPTPPFTPKM	Q6PFW2	ARHGEF11	Q16539	p38a	String	CMGC/MAPK	1.85	1.17
F8W8P9	8	T	TRSLENPTPPFTPKM	Q6PFW2	ARHGEF11	O15264	p38d	String	CMGC/MAPK	1.85	1.17
F8W8P9	8	S	RWTDGSLSPPAKEPL	Q6PFW2	ARHGEF11	P53778	p38g	String	CMGC/MAPK	1.38	1.17
F8W8P9	8	S	RWTDGSLSPPAKEPL	Q6PFW2	ARHGEF11	P27361	Erk1	String	CMGC/MAPK	1.38	1.17
F8W8P9	8	S	RWTDGSLSPPAKEPL	Q6PFW2	ARHGEF11	Q13164	Erk5	String	CMGC/MAPK	1.38	1.17
F8W8P9	8	S	RWTDGSLSPPAKEPL	Q6PFW2	ARHGEF11	Q16659	Erk3	String	CMGC/MAPK	1.38	1.17
F8W8P9	8	S	RWTDGSLSPPAKEPL	Q6PFW2	ARHGEF11	A8MTD8	JNK3	String	CMGC/MAPK	1.38	1.17
F8W8P9	8	S	RWTDGSLSPPAKEPL	Q6PFW2	ARHGEF11	D3DX92	JNK1	String	CMGC/MAPK	1.38	1.17
F8W8P9	8	S	RWTDGSLSPPAKEPL	Q6PFW2	ARHGEF11	Q15759	p38b	String	CMGC/MAPK	1.38	1.17
F8W8P9	8	S	RWTDGSLSPPAKEPL	Q6PFW2	ARHGEF11	P45984	JNK2	String	CMGC/MAPK	1.38	1.17
F8W8P9	8	S	RWTDGSLSPPAKEPL	Q6PFW2	ARHGEF11	P28482	Erk2	String	CMGC/MAPK	1.38	1.17
F8W8P9	8	S	RWTDGSLSPPAKEPL	Q6PFW2	ARHGEF11	Q16539	p38a	String	CMGC/MAPK	1.38	1.17
F8W8P9	8	S	RWTDGSLSPPAKEPL	Q6PFW2	ARHGEF11	O15264	p38d	String	CMGC/MAPK	1.38	1.17
O15226	8	S	KGQKRHLSTCDGQNP	O15226	NKRF	O75962	Trio	String	CAMK	1.94	1.17
O15226	8	S	KGQKRHLSTCDGQNP	O15226	NKRF	Q96RU8	Trb1	String	CAMK	1.94	1.17
O15226	8	S	KGQKRHLSTCDGQNP	O15226	NKRF	Q96RU7	Trb3	String	CAMK	1.94	1.17
O15226	8	S	KGQKRHLSTCDGQNP	O15226	NKRF	Q9C098	DCLK3	String	CAMK	1.94	1.17
O15226	8	S	KGQKRHLSTCDGQNP	O15226	NKRF	Q8N568	DCLK2	String	CAMK	1.94	1.17
O15226	8	S	KGQKRHLSTCDGQNP	O15226	NKRF	A6NGQ3	Obscn	String	CAMK	1.94	1.17
O15226	8	S	KGQKRHLSTCDGQNP	O15226	NKRF	Q15772	SPEG	String	CAMK	1.94	1.17
O15226	8	S	KGQKRHLSTCDGQNP	O15226	NKRF	Q6SA08	TSSK4	String	CAMK	1.94	1.17
O15226	8	S	KGQKRHLSTCDGQNP	O15226	NKRF	O15075	DCLK1	String	CAMK	1.94	1.17
O15226	8	S	KGQKRHLSTCDGQNP	O15226	NKRF	Q96QS6	PSKH2	String	CAMK	1.94	1.17
O15226	8	S	KGQKRHLSTCDGQNP	O15226	NKRF	Q92519	Trb2	String	CAMK	1.94	1.17
O15226	8	S	KGQKRHLSTCDGQNP	O15226	NKRF	Q86V86	PIM3	String	CAMK	1.94	1.17
O15226	8	S	KGQKRHLSTCDGQNP	O15226	NKRF	O60229	Trad	String	CAMK	1.94	1.17
O15226	8	S	KGQKRHLSTCDGQNP	O15226	NKRF	P11801	PSKH1	String	CAMK	1.94	1.17
O15226	8	S	KGQKRHLSTCDGQNP	O15226	NKRF	Q96PN8	TSSK3	String	CAMK	1.94	1.17
O15226	8	S	KGQKRHLSTCDGQNP	O15226	NKRF	Q96PF2	TSSK2	String	CAMK	1.94	1.17
O15226	8	S	KGQKRHLSTCDGQNP	O15226	NKRF	B2RDF9	VACAMKL	String	CAMK	1.94	1.17
O15226	8	S	KGQKRHLSTCDGQNP	O15226	NKRF	Q9P1W9	PIM2	String	CAMK	1.94	1.17
O15226	8	S	KGQKRHLSTCDGQNP	O15226	NKRF	P11309	PIM1	String	CAMK	1.94	1.17
O15226	8	S	KGQKRHLSTCDGQNP	O15226	NKRF	Q13555	CaMK2g	String	CAMK/CAMK2	2.55	1.56
O15226	8	S	KGQKRHLSTCDGQNP	O15226	NKRF	Q13554	CaMK2b	String	CAMK/CAMK2	2.55	1.56
O15226	8	S	KGQKRHLSTCDGQNP	O15226	NKRF	Q13557	CaMK2d	String	CAMK/CAMK2	2.55	1.56
O15226	8	S	SQCHTGSSPRGSGKK	O15226	NKRF	P42345	FRAP	String	Atypical/PIKK/FRAP	3.07	2.79
G3V599	8	S	PSDTGSLSPPWDQDR	O15320	CTAGE5	Q9UQ07	MOK	String	CMGC	2.33	1.46
G3V599	8	S	PSDTGSLSPPWDQDR	O15320	CTAGE5	Q96SB4	SRPK1	String	CMGC	2.33	1.46
G3V599	8	S	PSDTGSLSPPWDQDR	O15320	CTAGE5	Q8IVW4	CDKL3	String	CMGC	2.33	1.46
G3V599	8	S	PSDTGSLSPPWDQDR	O15320	CTAGE5	B4DH08	CDKL2	String	CMGC	2.33	1.46
G3V599	8	S	PSDTGSLSPPWDQDR	O15320	CTAGE5	O76039	CDKL5	String	CMGC	2.33	1.46
G3V599	8	S	PSDTGSLSPPWDQDR	O15320	CTAGE5	C9JQJ0	SRPK2	String	CMGC	2.33	1.46
G3V599	8	S	PSDTGSLSPPWDQDR	O15320	CTAGE5	P20794	MAK	String	CMGC	2.33	1.46
G3V599	8	S	PSDTGSLSPPWDQDR	O15320	CTAGE5	Q9HAZ1	CLK4	String	CMGC	2.33	1.46
G3V599	8	S	PSDTGSLSPPWDQDR	O15320	CTAGE5	Q59FC5	CLK3	String	CMGC	2.33	1.46
G3V599	8	S	PSDTGSLSPPWDQDR	O15320	CTAGE5	P49760	CLK2	String	CMGC	2.33	1.46
G3V599	8	S	PSDTGSLSPPWDQDR	O15320	CTAGE5	B4DFW7	CLK1	String	CMGC	2.33	1.46
G3V599	8	S	PSDTGSLSPPWDQDR	O15320	CTAGE5	Q2NME9	CDKL4	String	CMGC	2.33	1.46
G3V599	8	S	PSDTGSLSPPWDQDR	O15320	CTAGE5	Q9UPE1	MSSK1	String	CMGC	2.33	1.46
G3V599	8	S	PSDTGSLSPPWDQDR	O15320	CTAGE5	Q00532	CDKL1	String	CMGC	2.33	1.46
G3V599	8	S	PSDTGSLSPPWDQDR	O15320	CTAGE5	Q9UPZ9	ICK	String	CMGC	2.33	1.46
O15400	8	T	EFGSLPTTPSEQRQR	O15400	STX7	P27361	Erk1	String	CMGC/MAPK	3.01	1.17
O15400	8	T	EFGSLPTTPSEQRQR	O15400	STX7	Q13164	Erk5	String	CMGC/MAPK	3.01	1.17
O15400	8	T	EFGSLPTTPSEQRQR	O15400	STX7	Q16659	Erk3	String	CMGC/MAPK	3.01	1.17
O15400	8	T	EFGSLPTTPSEQRQR	O15400	STX7	A8MTD8	JNK3	String	CMGC/MAPK	3.01	1.17
O15400	8	T	EFGSLPTTPSEQRQR	O15400	STX7	D3DX92	JNK1	String	CMGC/MAPK	3.01	1.17
O15400	8	T	EFGSLPTTPSEQRQR	O15400	STX7	Q15759	p38b	String	CMGC/MAPK	3.01	1.17
O15400	8	T	EFGSLPTTPSEQRQR	O15400	STX7	P45984	JNK2	String	CMGC/MAPK	3.01	1.17
O15400	8	T	EFGSLPTTPSEQRQR	O15400	STX7	P28482	Erk2	String	CMGC/MAPK	3.01	1.17
O15400	8	T	EFGSLPTTPSEQRQR	O15400	STX7	Q16539	p38a	String	CMGC/MAPK	3.01	1.17
O15400	8	T	EFGSLPTTPSEQRQR	O15400	STX7	O15264	p38d	String	CMGC/MAPK	3.01	1.17
O43187	8	S	TFPGPGSSPARAHQP	O43187	IRAK2	P53778	p38g	String	CMGC/MAPK	2.28	1.17
O43187	8	S	TFPGPGSSPARAHQP	O43187	IRAK2	P27361	Erk1	String	CMGC/MAPK	2.28	1.17
O43187	8	S	TFPGPGSSPARAHQP	O43187	IRAK2	Q13164	Erk5	String	CMGC/MAPK	2.28	1.17
O43187	8	S	TFPGPGSSPARAHQP	O43187	IRAK2	Q16659	Erk3	String	CMGC/MAPK	2.28	1.17
O43187	8	S	TFPGPGSSPARAHQP	O43187	IRAK2	A8MTD8	JNK3	String	CMGC/MAPK	2.28	1.17
O43187	8	S	TFPGPGSSPARAHQP	O43187	IRAK2	D3DX92	JNK1	String	CMGC/MAPK	2.28	1.17
O43187	8	S	TFPGPGSSPARAHQP	O43187	IRAK2	Q15759	p38b	String	CMGC/MAPK	2.28	1.17
O43187	8	S	TFPGPGSSPARAHQP	O43187	IRAK2	P45984	JNK2	String	CMGC/MAPK	2.28	1.17
O43187	8	S	TFPGPGSSPARAHQP	O43187	IRAK2	P28482	Erk2	String	CMGC/MAPK	2.28	1.17
O43187	8	S	TFPGPGSSPARAHQP	O43187	IRAK2	Q16539	p38a	String	CMGC/MAPK	2.28	1.17
O43187	8	S	TFPGPGSSPARAHQP	O43187	IRAK2	O15264	p38d	String	CMGC/MAPK	2.28	1.17
K7EMD6	8	S	EMPQDLRSPARTPPS	O43765	SGTA	P11802	CDK4	String	CMGC/CDK	2.98	1.11
K7EMD6	8	S	EMPQDLRSPARTPPS	O43765	SGTA	Q00537	PCTAIRE2	String	CMGC/CDK	2.98	1.11
K7EMD6	8	S	EMPQDLRSPARTPPS	O43765	SGTA	Q00536	PCTAIRE1	String	CMGC/CDK	2.98	1.11
K7EMD6	8	S	EMPQDLRSPARTPPS	O43765	SGTA	Q00535	CDK5	String	CMGC/CDK	2.98	1.11
K7EMD6	8	S	EMPQDLRSPARTPPS	O43765	SGTA	Q00534	CDK6	String	CMGC/CDK	2.98	1.11
K7EMD6	8	S	EMPQDLRSPARTPPS	O43765	SGTA	O94921	PFTAIRE1	String	CMGC/CDK	2.98	1.11
K7EMD6	8	S	EMPQDLRSPARTPPS	O43765	SGTA	P42345	FRAP	String	Atypical/PIKK/FRAP	9	2.79
O60343	8	S	QPRRRHASAPSHVQP	O60343	TBC1D4	Q96S38	RSKL1	String	AGC	4.15	1.94
O60343	8	S	QPRRRHASAPSHVQP	O60343	TBC1D4	Q15208	NDR1	String	AGC	4.15	1.94
O60343	8	S	QPRRRHASAPSHVQP	O60343	TBC1D4	O60307	MAST3	String	AGC	4.15	1.94
O60343	8	S	QPRRRHASAPSHVQP	O60343	TBC1D4	Q9Y2H9	MAST1	String	AGC	4.15	1.94
O60343	8	S	QPRRRHASAPSHVQP	O60343	TBC1D4	Q96GX5	MASTL	String	AGC	4.15	1.94
O60343	8	S	QPRRRHASAPSHVQP	O60343	TBC1D4	Q9Y6S9	RSKL2	String	AGC	4.15	1.94
O60343	8	S	QPRRRHASAPSHVQP	O60343	TBC1D4	Q96LW2	SgK494	String	AGC	4.15	1.94
O60343	8	S	QPRRRHASAPSHVQP	O60343	TBC1D4	Q9NY57	YANK2	String	AGC	4.15	1.94
O60343	8	S	QPRRRHASAPSHVQP	O60343	TBC1D4	Q9Y2H1	NDR2	String	AGC	4.15	1.94
O60343	8	S	QPRRRHASAPSHVQP	O60343	TBC1D4	Q9NRM7	LATS2	String	AGC	4.15	1.94
O60343	8	S	QPRRRHASAPSHVQP	O60343	TBC1D4	Q6P0Q8	MAST2	String	AGC	4.15	1.94
O60343	8	S	QPRRRHASAPSHVQP	O60343	TBC1D4	O95835	LATS1	String	AGC	4.15	1.94
O60343	8	S	QPRRRHASAPSHVQP	O60343	TBC1D4	Q6P5Z2	PKN3	String	AGC	4.15	1.94
O60343	8	S	QPRRRHASAPSHVQP	O60343	TBC1D4	Q8WU08	YANK1	String	AGC	4.15	1.94
O60343	8	S	QPRRRHASAPSHVQP	O60343	TBC1D4	Q16512	PKN1	String	AGC	4.15	1.94
O60343	8	S	QPRRRHASAPSHVQP	O60343	TBC1D4	Q16513	PKN2	String	AGC	4.15	1.94
O60343	8	S	QPRRRHASAPSHVQP	O60343	TBC1D4	Q86UX6	YANK3	String	AGC	4.15	1.94
O60343	8	S	QPRRRHASAPSHVQP	O60343	TBC1D4	P31751	AKT2	String	AGC/AKT	8.03	1.64
O60343	8	S	QPRRRHASAPSHVQP	O60343	TBC1D4	P31749	AKT1	String	AGC/AKT	8.03	1.64
O60343	8	S	QPRRRHASAPSHVQP	O60343	TBC1D4	Q13237	PKG2	String	AGC/PKG	3.02	1.72
O60343	8	S	QPRRRHASAPSHVQP	O60343	TBC1D4	A5YM56	PKG1	String	AGC/PKG	3.02	1.72
O60343	8	S	QPRRRHASAPSHVQP	O60343	TBC1D4	P23443	p70S6K	String	AGC/RSK	2.64	1.27
O60343	8	S	QPRRRHASAPSHVQP	O60343	TBC1D4	P51812	RSK2	String	AGC/RSK	2.64	1.27
O60343	8	S	QPRRRHASAPSHVQP	O60343	TBC1D4	Q15349	RSK1	String	AGC/RSK	2.64	1.27
O60343	8	S	QPRRRHASAPSHVQP	O60343	TBC1D4	Q9UK32	RSK4	String	AGC/RSK	2.64	1.27
O60343	8	S	QPRRRHASAPSHVQP	O60343	TBC1D4	O75582	MSK1	String	AGC/RSK	2.64	1.27
O60343	8	S	QPRRRHASAPSHVQP	O60343	TBC1D4	Q9UBS0	p70S6Kb	String	AGC/RSK	2.64	1.27
O60343	8	S	QPRRRHASAPSHVQP	O60343	TBC1D4	O75676	MSK2	String	AGC/RSK	2.64	1.27
O60343	8	S	QPRRRHASAPSHVQP	O60343	TBC1D4	O00141	SGK1	String	AGC/SGK	8.35	2.06
O60343	8	S	QPRRRHASAPSHVQP	O60343	TBC1D4	Q9HBY8	SGK2	String	AGC/SGK	8.35	2.06
O60343	8	S	QPRRRHASAPSHVQP	O60343	TBC1D4	Q53TX8	HGK	String	STE/STE20	1.78	1.4
O60343	8	S	QPRRRHASAPSHVQP	O60343	TBC1D4	D3DRA1	SLK	String	STE/STE20	1.78	1.4
O60343	8	S	QPRRRHASAPSHVQP	O60343	TBC1D4	Q13153	PAK1	String	STE/STE20	1.78	1.4
O60343	8	S	QPRRRHASAPSHVQP	O60343	TBC1D4	Q8N4C8	MINK	String	STE/STE20	1.78	1.4
O60343	8	S	QPRRRHASAPSHVQP	O60343	TBC1D4	Q9C0K7	STLK6	String	STE/STE20	1.78	1.4
O60343	8	S	QPRRRHASAPSHVQP	O60343	TBC1D4	O96013	PAK4	String	STE/STE20	1.78	1.4
O60343	8	S	QPRRRHASAPSHVQP	O60343	TBC1D4	Q92918	HPK1	String	STE/STE20	1.78	1.4
O60343	8	S	QPRRRHASAPSHVQP	O60343	TBC1D4	O00506	YSK1	String	STE/STE20	1.78	1.4
O60343	8	S	QPRRRHASAPSHVQP	O60343	TBC1D4	Q13177	PAK2	String	STE/STE20	1.78	1.4
O60343	8	S	QPRRRHASAPSHVQP	O60343	TBC1D4	O94804	LOK	String	STE/STE20	1.78	1.4
O60343	8	S	QPRRRHASAPSHVQP	O60343	TBC1D4	Q7RTN6	STLK5	String	STE/STE20	1.78	1.4
O60343	8	S	QPRRRHASAPSHVQP	O60343	TBC1D4	C9J3X5	MYO3B	String	STE/STE20	1.78	1.4
O60343	8	S	QPRRRHASAPSHVQP	O60343	TBC1D4	Q8IVH8	KHS2	String	STE/STE20	1.78	1.4
O60343	8	S	QPRRRHASAPSHVQP	O60343	TBC1D4	Q9P286	PAK5	String	STE/STE20	1.78	1.4
O60343	8	S	QPRRRHASAPSHVQP	O60343	TBC1D4	O95747	OSR1	String	STE/STE20	1.78	1.4
O60343	8	S	QPRRRHASAPSHVQP	O60343	TBC1D4	Q9P289	MST4	String	STE/STE20	1.78	1.4
O60343	8	S	QPRRRHASAPSHVQP	O60343	TBC1D4	Q7Z2Y5	NRK	String	STE/STE20	1.78	1.4
O60934	8	S	RIPNYQLSPTKLPSI	O60934	NBN	P50750	CDK9	Exp.&String	CMGC/CDK	2.41	1.11
O60934	8	S	RIPNYQLSPTKLPSI	O60934	NBN	Q8IZL9	CCRK	Exp.&String	CMGC/CDK	2.41	1.11
O60934	8	S	RIPNYQLSPTKLPSI	O60934	NBN	B4DK03	PCTAIRE3	Exp.&String	CMGC/CDK	2.41	1.11
O60934	8	S	RIPNYQLSPTKLPSI	O60934	NBN	P50613	CDK7	Exp.&String	CMGC/CDK	2.41	1.11
O60934	8	S	RIPNYQLSPTKLPSI	O60934	NBN	Q14004	CHED	Exp.&String	CMGC/CDK	2.41	1.11
O60934	8	S	RIPNYQLSPTKLPSI	O60934	NBN	Q96Q40	PFTAIRE2	Exp.&String	CMGC/CDK	2.41	1.11
O60934	8	S	RIPNYQLSPTKLPSI	O60934	NBN	Q9NYV4	CRK7	Exp.&String	CMGC/CDK	2.41	1.11
O60934	8	S	RIPNYQLSPTKLPSI	O60934	NBN	P11802	CDK4	Exp.&String	CMGC/CDK	2.41	1.11
O60934	8	S	RIPNYQLSPTKLPSI	O60934	NBN	Q00537	PCTAIRE2	Exp.&String	CMGC/CDK	2.41	1.11
O60934	8	S	RIPNYQLSPTKLPSI	O60934	NBN	Q00536	PCTAIRE1	Exp.&String	CMGC/CDK	2.41	1.11
O60934	8	S	RIPNYQLSPTKLPSI	O60934	NBN	Q00535	CDK5	Exp.&String	CMGC/CDK	2.41	1.11
O60934	8	S	RIPNYQLSPTKLPSI	O60934	NBN	Q00534	CDK6	Exp.&String	CMGC/CDK	2.41	1.11
O60934	8	S	RIPNYQLSPTKLPSI	O60934	NBN	O94921	PFTAIRE1	Exp.&String	CMGC/CDK	2.41	1.11
O60934	8	S	RIPNYQLSPTKLPSI	O60934	NBN	P24941	CDK2	String	CMGC/CDK/CDC2	2.9	1.58
H0YM23	8	S	PGGVSRNSPLDCGSA	O75179	ANKRD17	P24941	CDK2	String	CMGC/CDK/CDC2	1.94	1.58
O75330	8	S	DPSGCAPSPGAYDVK	O75330	HMMR	P27361	Erk1	Exp.&String	CMGC/MAPK	2	1.17
O75330	8	S	DPSGCAPSPGAYDVK	O75330	HMMR	Q13164	Erk5	Exp.&String	CMGC/MAPK	2	1.17
O75330	8	S	DPSGCAPSPGAYDVK	O75330	HMMR	Q16659	Erk3	Exp.&String	CMGC/MAPK	2	1.17
O75330	8	S	DPSGCAPSPGAYDVK	O75330	HMMR	A8MTD8	JNK3	Exp.&String	CMGC/MAPK	2	1.17
O75330	8	S	DPSGCAPSPGAYDVK	O75330	HMMR	D3DX92	JNK1	Exp.&String	CMGC/MAPK	2	1.17
O75330	8	S	DPSGCAPSPGAYDVK	O75330	HMMR	Q15759	p38b	Exp.&String	CMGC/MAPK	2	1.17
O75330	8	S	DPSGCAPSPGAYDVK	O75330	HMMR	P45984	JNK2	Exp.&String	CMGC/MAPK	2	1.17
O75330	8	S	DPSGCAPSPGAYDVK	O75330	HMMR	P28482	Erk2	Exp.&String	CMGC/MAPK	2	1.17
O75330	8	S	DPSGCAPSPGAYDVK	O75330	HMMR	Q16539	p38a	Exp.&String	CMGC/MAPK	2	1.17
O75330	8	S	DPSGCAPSPGAYDVK	O75330	HMMR	O15264	p38d	Exp.&String	CMGC/MAPK	2	1.17
O75330	8	S	DPSGCAPSPGAYDVK	O75330	HMMR	P06493	CDC2	String	CMGC/CDK/CDC2	1.94	1.58
O75330	8	S	DPSGCAPSPGAYDVK	O75330	HMMR	P24941	CDK2	String	CMGC/CDK/CDC2	1.94	1.58
B4DJ25	8	S	EAPKAQLSPGIYDDT	O75376	NCOR1	B4DFW7	CLK1	Exp.&String	CMGC	2.42	1.46
B4DJ25	8	S	EAPKAQLSPGIYDDT	O75376	NCOR1	Q2NME9	CDKL4	Exp.&String	CMGC	2.42	1.46
B4DJ25	8	S	EAPKAQLSPGIYDDT	O75376	NCOR1	Q9UPE1	MSSK1	Exp.&String	CMGC	2.42	1.46
B4DJ25	8	S	EAPKAQLSPGIYDDT	O75376	NCOR1	Q00532	CDKL1	Exp.&String	CMGC	2.42	1.46
B4DJ25	8	S	EAPKAQLSPGIYDDT	O75376	NCOR1	Q9UPZ9	ICK	Exp.&String	CMGC	2.42	1.46
B4DJ25	8	S	EAPKAQLSPGIYDDT	O75376	NCOR1	P50750	CDK9	String	CMGC/CDK	1.76	1.11
B4DJ25	8	S	EAPKAQLSPGIYDDT	O75376	NCOR1	Q8IZL9	CCRK	String	CMGC/CDK	1.76	1.11
B4DJ25	8	S	EAPKAQLSPGIYDDT	O75376	NCOR1	B4DK03	PCTAIRE3	String	CMGC/CDK	1.76	1.11
B4DJ25	8	S	EAPKAQLSPGIYDDT	O75376	NCOR1	P50613	CDK7	String	CMGC/CDK	1.76	1.11
B4DJ25	8	S	EAPKAQLSPGIYDDT	O75376	NCOR1	Q14004	CHED	String	CMGC/CDK	1.76	1.11
B4DJ25	8	S	EAPKAQLSPGIYDDT	O75376	NCOR1	Q96Q40	PFTAIRE2	String	CMGC/CDK	1.76	1.11
B4DJ25	8	S	EAPKAQLSPGIYDDT	O75376	NCOR1	Q9NYV4	CRK7	String	CMGC/CDK	1.76	1.11
B4DJ25	8	S	EAPKAQLSPGIYDDT	O75376	NCOR1	P11802	CDK4	String	CMGC/CDK	1.76	1.11
B4DJ25	8	S	EAPKAQLSPGIYDDT	O75376	NCOR1	Q00537	PCTAIRE2	String	CMGC/CDK	1.76	1.11
B4DJ25	8	S	EAPKAQLSPGIYDDT	O75376	NCOR1	Q00536	PCTAIRE1	String	CMGC/CDK	1.76	1.11
B4DJ25	8	S	EAPKAQLSPGIYDDT	O75376	NCOR1	Q00535	CDK5	String	CMGC/CDK	1.76	1.11
B4DJ25	8	S	EAPKAQLSPGIYDDT	O75376	NCOR1	Q00534	CDK6	String	CMGC/CDK	1.76	1.11
B4DJ25	8	S	EAPKAQLSPGIYDDT	O75376	NCOR1	O94921	PFTAIRE1	String	CMGC/CDK	1.76	1.11
B4DJ25	8	S	EAPKAQLSPGIYDDT	O75376	NCOR1	Q13523	PRP4	String	CMGC/DYRK	2.67	1.5
B4DJ25	8	S	EAPKAQLSPGIYDDT	O75376	NCOR1	Q92630	DYRK2	String	CMGC/DYRK	2.67	1.5
B4DJ25	8	S	EAPKAQLSPGIYDDT	O75376	NCOR1	Q9NR20	DYRK4	String	CMGC/DYRK	2.67	1.5
B4DJ25	8	S	EAPKAQLSPGIYDDT	O75376	NCOR1	Q9H2X6	HIPK2	String	CMGC/DYRK	2.67	1.5
B4DJ25	8	S	EAPKAQLSPGIYDDT	O75376	NCOR1	Q86Z02	HIPK1	String	CMGC/DYRK	2.67	1.5
B4DJ25	8	S	EAPKAQLSPGIYDDT	O75376	NCOR1	Q8NE63	HIPK4	String	CMGC/DYRK	2.67	1.5
B4DJ25	8	S	EAPKAQLSPGIYDDT	O75376	NCOR1	O43781	DYRK3	String	CMGC/DYRK	2.67	1.5
B4DJ25	8	S	EAPKAQLSPGIYDDT	O75376	NCOR1	Q13627	DYRK1A	String	CMGC/DYRK	2.67	1.5
B4DJ25	8	S	EAPKAQLSPGIYDDT	O75376	NCOR1	Q9Y463	DYRK1B	String	CMGC/DYRK	2.67	1.5
B4DJ25	8	S	EAPKAQLSPGIYDDT	O75376	NCOR1	Q9H422	HIPK3	String	CMGC/DYRK	2.67	1.5
B4DJ25	8	S	EAPKAQLSPGIYDDT	O75376	NCOR1	P27361	Erk1	String	CMGC/MAPK	2.58	1.17
B4DJ25	8	S	EAPKAQLSPGIYDDT	O75376	NCOR1	Q13164	Erk5	String	CMGC/MAPK	2.58	1.17
B4DJ25	8	S	EAPKAQLSPGIYDDT	O75376	NCOR1	Q16659	Erk3	String	CMGC/MAPK	2.58	1.17
B4DJ25	8	S	EAPKAQLSPGIYDDT	O75376	NCOR1	A8MTD8	JNK3	String	CMGC/MAPK	2.58	1.17
B4DJ25	8	S	EAPKAQLSPGIYDDT	O75376	NCOR1	D3DX92	JNK1	String	CMGC/MAPK	2.58	1.17
B4DJ25	8	S	EAPKAQLSPGIYDDT	O75376	NCOR1	Q15759	p38b	String	CMGC/MAPK	2.58	1.17
B4DJ25	8	S	EAPKAQLSPGIYDDT	O75376	NCOR1	P45984	JNK2	String	CMGC/MAPK	2.58	1.17
B4DJ25	8	S	EAPKAQLSPGIYDDT	O75376	NCOR1	P28482	Erk2	String	CMGC/MAPK	2.58	1.17
B4DJ25	8	S	EAPKAQLSPGIYDDT	O75376	NCOR1	Q16539	p38a	String	CMGC/MAPK	2.58	1.17
B4DJ25	8	S	EAPKAQLSPGIYDDT	O75376	NCOR1	O15264	p38d	String	CMGC/MAPK	2.58	1.17
B4DJ25	8	S	EAPKAQLSPGIYDDT	O75376	NCOR1	Q9Y4A5	TRRAP	String	Atypical/PIKK	1.5	1.38
B4DJ25	8	S	EAPKAQLSPGIYDDT	O75376	NCOR1	P24941	CDK2	String	CMGC/CDK/CDC2	2.12	1.58
O75385	8	S	RIERNLQSPTQFQTP	O75385	ULK1	P42345	FRAP	String	Atypical/PIKK/FRAP	5.13	2.79
O75420	8	S	GDRWRSASPDGGPRS	O75420	GIGYF1	P31749	AKT1	String	AGC/AKT	5.2	1.64
O75533	8	T	GSETPGATPGSKIWD	O75533	SF3B1	P24941	CDK2	String	CMGC/CDK/CDC2	2.94	1.58
O75533	8	T	PFADGGKTPDPKMNA	O75533	SF3B1	P49841	GSK3B	Exp.	CMGC/GSK	2.26	1.62
O75533	8	T	PFADGGKTPDPKMNA	O75533	SF3B1	P49840	GSK3A	Exp.	CMGC/GSK	2.26	1.62
O75533	8	T	PFADGGKTPDPKMNA	O75533	SF3B1	P24941	CDK2	String	CMGC/CDK/CDC2	2.65	1.58
O75533	8	T	SSWDQAETPGHTPSL	O75533	SF3B1	P49841	GSK3B	Exp.	CMGC/GSK	3.36	1.62
O75533	8	T	SSWDQAETPGHTPSL	O75533	SF3B1	P49840	GSK3A	Exp.	CMGC/GSK	3.36	1.62
O75533	8	T	SSWDQAETPGHTPSL	O75533	SF3B1	P24941	CDK2	String	CMGC/CDK/CDC2	3.62	1.58
B4DGZ4	8	S	HRRTMIISPERLDPF	O75533	SF3B1	Q13627	DYRK1A	Exp.&String	CMGC/DYRK	2.17	1.5
B4DGZ4	8	S	HRRTMIISPERLDPF	O75533	SF3B1	Q9Y463	DYRK1B	String	CMGC/DYRK	2.17	1.5
B4DGZ4	8	S	HRRTMIISPERLDPF	O75533	SF3B1	Q9H422	HIPK3	String	CMGC/DYRK	2.17	1.5
B4DGZ4	8	S	HRRTMIISPERLDPF	O75533	SF3B1	P24941	CDK2	String	CMGC/CDK/CDC2	2.29	1.58
O75533	8	T	ADQTPGATPKKLSSW	O75533	SF3B1	Q13627	DYRK1A	Exp.&String	CMGC/DYRK	1.83	1.5
O75533	8	T	ADQTPGATPKKLSSW	O75533	SF3B1	Q9Y463	DYRK1B	String	CMGC/DYRK	1.83	1.5
O75533	8	T	ADQTPGATPKKLSSW	O75533	SF3B1	Q9H422	HIPK3	String	CMGC/DYRK	1.83	1.5
O75533	8	T	ADQTPGATPKKLSSW	O75533	SF3B1	P24941	CDK2	String	CMGC/CDK/CDC2	3.79	1.58
O75533	8	T	WDQTADQTPGATPKK	O75533	SF3B1	P49841	GSK3B	Exp.	CMGC/GSK	2.2	1.62
O75533	8	T	WDQTADQTPGATPKK	O75533	SF3B1	P49840	GSK3A	Exp.	CMGC/GSK	2.2	1.62
O75533	8	T	WDQTADQTPGATPKK	O75533	SF3B1	P24941	CDK2	String	CMGC/CDK/CDC2	3.1	1.58
O94804	8	T	AECPNPSTPSKAAKF	O94804	LOK	Q13233	MAP3K1	String	STE/STE11	1.8	1.63
O94804	8	T	AECPNPSTPSKAAKF	O94804	LOK	Q6ZN16	MAP3K7	String	STE/STE11	1.8	1.63
O94804	8	T	AECPNPSTPSKAAKF	O94804	LOK	Q99683	MAP3K5	String	STE/STE11	1.8	1.63
O94804	8	T	AECPNPSTPSKAAKF	O94804	LOK	O95382	MAP3K6	String	STE/STE11	1.8	1.63
O94804	8	T	AECPNPSTPSKAAKF	O94804	LOK	Q9Y2U5	MAP3K2	String	STE/STE11	1.8	1.63
O94804	8	T	AECPNPSTPSKAAKF	O94804	LOK	Q56UN5	MAP3K8	String	STE/STE11	1.8	1.63
O94804	8	T	AECPNPSTPSKAAKF	O94804	LOK	Q99759	MAP3K3	String	STE/STE11	1.8	1.63
O94804	8	T	AECPNPSTPSKAAKF	O94804	LOK	B9EG75	MAP3K4	String	STE/STE11	1.8	1.63
F8WBA3	8	S	GEKSFRRSVVGTPAY	Q1KKQ2	PKD1	Q16512	PKN1	String	AGC	2.34	1.94
F8WBA3	8	S	GEKSFRRSVVGTPAY	Q1KKQ2	PKD1	Q16513	PKN2	String	AGC	2.34	1.94
F8WBA3	8	S	GEKSFRRSVVGTPAY	Q1KKQ2	PKD1	Q86UX6	YANK3	String	AGC	2.34	1.94
F8WBA3	8	S	GEKSFRRSVVGTPAY	Q1KKQ2	PKD1	P41743	PKCi	String	AGC/PKC	2.66	2.36
F8WBA3	8	S	GEKSFRRSVVGTPAY	Q1KKQ2	PKD1	Q04759	PKCt	String	AGC/PKC	2.66	2.36
F8WBA3	8	S	GEKSFRRSVVGTPAY	Q1KKQ2	PKD1	D3DWF5	PKCb	String	AGC/PKC	2.66	2.36
F8WBA3	8	S	GEKSFRRSVVGTPAY	Q1KKQ2	PKD1	P17252	PKCa	String	AGC/PKC	2.66	2.36
F8WBA3	8	S	GEKSFRRSVVGTPAY	Q1KKQ2	PKD1	P05129	PKCg	String	AGC/PKC	2.66	2.36
F8WBA3	8	S	GEKSFRRSVVGTPAY	Q1KKQ2	PKD1	Q05655	PKCd	String	AGC/PKC	2.66	2.36
F8WBA3	8	S	GEKSFRRSVVGTPAY	Q1KKQ2	PKD1	P24723	PKCh	Exp.&String	AGC/PKC	2.66	2.36
F8WBA3	8	S	GEKSFRRSVVGTPAY	Q1KKQ2	PKD1	Q02156	PKCe	Exp.&String	AGC/PKC	2.66	2.36
F8WBA3	8	S	GEKSFRRSVVGTPAY	Q1KKQ2	PKD1	Q05513	PKCz	Exp.&String	AGC/PKC	2.66	2.36
F8WBA3	8	S	GEKSFRRSVVGTPAY	Q1KKQ2	PKD1	P27448	MARK3	String	CAMK/CAMKL	3.42	1.28
F8WBA3	8	S	GEKSFRRSVVGTPAY	Q1KKQ2	PKD1	Q96RG2	PASK	String	CAMK/CAMKL	3.42	1.28
F8WBA3	8	S	GEKSFRRSVVGTPAY	Q1KKQ2	PKD1	B4E0Y5	NuaK2	String	CAMK/CAMKL	3.42	1.28
F8WBA3	8	S	GEKSFRRSVVGTPAY	Q1KKQ2	PKD1	Q9NRH2	SNRK	String	CAMK/CAMKL	3.42	1.28
F8WBA3	8	S	GEKSFRRSVVGTPAY	Q1KKQ2	PKD1	Q7KZI7	MARK2	String	CAMK/CAMKL	3.42	1.28
F8WBA3	8	S	GEKSFRRSVVGTPAY	Q1KKQ2	PKD1	Q8IWQ3	BRSK2	String	CAMK/CAMKL	3.42	1.28
F8WBA3	8	S	GEKSFRRSVVGTPAY	Q1KKQ2	PKD1	Q1KKQ2	PKD1	Exp.	CAMK/PKD	11.9	2.13
F8WBA3	8	S	GEKSFRRSVVGTPAY	Q1KKQ2	PKD1	Q92918	HPK1	String	STE/STE20	4.04	1.4
F8WBA3	8	S	GEKSFRRSVVGTPAY	Q1KKQ2	PKD1	O00506	YSK1	String	STE/STE20	4.04	1.4
F8WBA3	8	S	GEKSFRRSVVGTPAY	Q1KKQ2	PKD1	Q13177	PAK2	String	STE/STE20	4.04	1.4
F8WBA3	8	S	GEKSFRRSVVGTPAY	Q1KKQ2	PKD1	O94804	LOK	String	STE/STE20	4.04	1.4
F8WBA3	8	S	GEKSFRRSVVGTPAY	Q1KKQ2	PKD1	Q7RTN6	STLK5	String	STE/STE20	4.04	1.4
F8WBA3	8	S	GEKSFRRSVVGTPAY	Q1KKQ2	PKD1	C9J3X5	MYO3B	String	STE/STE20	4.04	1.4
F8WBA3	8	S	GEKSFRRSVVGTPAY	Q1KKQ2	PKD1	Q8IVH8	KHS2	String	STE/STE20	4.04	1.4
F8WBA3	8	S	GEKSFRRSVVGTPAY	Q1KKQ2	PKD1	Q9P286	PAK5	String	STE/STE20	4.04	1.4
F8WBA3	8	S	GEKSFRRSVVGTPAY	Q1KKQ2	PKD1	O95747	OSR1	String	STE/STE20	4.04	1.4
F8WBA3	8	S	GEKSFRRSVVGTPAY	Q1KKQ2	PKD1	Q9P289	MST4	String	STE/STE20	4.04	1.4
F8WBA3	8	S	GEKSFRRSVVGTPAY	Q1KKQ2	PKD1	Q7Z2Y5	NRK	String	STE/STE20	4.04	1.4
F8WBA3	8	S	GEKSFRRSVVGTPAY	Q1KKQ2	PKD1	Q96PY6	NEK1	String	Other/NEK	8.31	2.22
F8WBA3	8	S	GEKSFRRSVVGTPAY	Q1KKQ2	PKD1	Q8NG66	NEK11	String	Other/NEK	8.31	2.22
F8WBA3	8	S	GEKSFRRSVVGTPAY	Q1KKQ2	PKD1	B7Z2D9	NEK6	String	Other/NEK	8.31	2.22
F8WBA3	8	S	GEKSFRRSVVGTPAY	Q1KKQ2	PKD1	P51956	NEK3	String	Other/NEK	8.31	2.22
F8WBA3	8	S	GEKSFRRSVVGTPAY	Q1KKQ2	PKD1	P51957	NEK4	String	Other/NEK	8.31	2.22
F8WBA3	8	S	GEKSFRRSVVGTPAY	Q1KKQ2	PKD1	P51955	NEK2	String	Other/NEK	8.31	2.22
F8WBA3	8	S	GEKSFRRSVVGTPAY	Q1KKQ2	PKD1	Q8TD19	NEK9	String	Other/NEK	8.31	2.22
F8WBA3	8	S	GEKSFRRSVVGTPAY	Q1KKQ2	PKD1	Q6ZWH5	NEK10	String	Other/NEK	8.31	2.22
F8WBA3	8	S	GEKSFRRSVVGTPAY	Q1KKQ2	PKD1	Q8TDX7	NEK7	String	Other/NEK	8.31	2.22
F8WBA3	8	S	GEKSFRRSVVGTPAY	Q1KKQ2	PKD1	Q86SG6	NEK8	String	Other/NEK	8.31	2.22
H7C172	8	T	RQALMPVTPQASVCT	O94806	PKD3	P49840	GSK3A	Exp.&String	CMGC/GSK	2.25	1.62
H7C172	8	T	RQALMPVTPQASVCT	O94806	PKD3	P42345	FRAP	String	Atypical/PIKK/FRAP	5.6	2.79
O95425	8	S	SFGDPQLSPEARPST	O95425	SVIL	P27361	Erk1	String	CMGC/MAPK	2.8	1.17
O95425	8	S	SFGDPQLSPEARPST	O95425	SVIL	Q13164	Erk5	String	CMGC/MAPK	2.8	1.17
O95425	8	S	SFGDPQLSPEARPST	O95425	SVIL	Q16659	Erk3	String	CMGC/MAPK	2.8	1.17
O95425	8	S	SFGDPQLSPEARPST	O95425	SVIL	A8MTD8	JNK3	String	CMGC/MAPK	2.8	1.17
O95425	8	S	SFGDPQLSPEARPST	O95425	SVIL	D3DX92	JNK1	String	CMGC/MAPK	2.8	1.17
O95425	8	S	SFGDPQLSPEARPST	O95425	SVIL	Q15759	p38b	String	CMGC/MAPK	2.8	1.17
O95425	8	S	SFGDPQLSPEARPST	O95425	SVIL	P45984	JNK2	String	CMGC/MAPK	2.8	1.17
O95425	8	S	SFGDPQLSPEARPST	O95425	SVIL	P28482	Erk2	String	CMGC/MAPK	2.8	1.17
O95425	8	S	SFGDPQLSPEARPST	O95425	SVIL	Q16539	p38a	String	CMGC/MAPK	2.8	1.17
O95425	8	S	SFGDPQLSPEARPST	O95425	SVIL	O15264	p38d	String	CMGC/MAPK	2.8	1.17
F5H1Z4	8	S	AGALSYVSPNTSKCP	O95453	PARN	Q16539	p38a	String	CMGC/MAPK	1.43	1.17
F5H1Z4	8	S	AGALSYVSPNTSKCP	O95453	PARN	O15264	p38d	String	CMGC/MAPK	1.43	1.17
F5H1Z4	8	S	AGALSYVSPNTSKCP	O95453	PARN	P06493	CDC2	String	CMGC/CDK/CDC2	2.83	1.58
F5H1Z4	8	S	AGALSYVSPNTSKCP	O95453	PARN	P24941	CDK2	String	CMGC/CDK/CDC2	2.83	1.58
O95613	8	S	SGFGARLSPGSGGPE	O95613	PCNT	Q14004	CHED	String	CMGC/CDK	1.59	1.11
O95613	8	S	SGFGARLSPGSGGPE	O95613	PCNT	Q96Q40	PFTAIRE2	String	CMGC/CDK	1.59	1.11
O95613	8	S	SGFGARLSPGSGGPE	O95613	PCNT	Q9NYV4	CRK7	String	CMGC/CDK	1.59	1.11
O95613	8	S	SGFGARLSPGSGGPE	O95613	PCNT	P11802	CDK4	String	CMGC/CDK	1.59	1.11
O95613	8	S	SGFGARLSPGSGGPE	O95613	PCNT	Q00537	PCTAIRE2	String	CMGC/CDK	1.59	1.11
O95613	8	S	SGFGARLSPGSGGPE	O95613	PCNT	Q00536	PCTAIRE1	String	CMGC/CDK	1.59	1.11
O95613	8	S	SGFGARLSPGSGGPE	O95613	PCNT	Q00535	CDK5	String	CMGC/CDK	1.59	1.11
O95613	8	S	SGFGARLSPGSGGPE	O95613	PCNT	Q00534	CDK6	String	CMGC/CDK	1.59	1.11
O95613	8	S	SGFGARLSPGSGGPE	O95613	PCNT	O94921	PFTAIRE1	String	CMGC/CDK	1.59	1.11
O95613	8	S	SGFGARLSPGSGGPE	O95613	PCNT	Q9H2X6	HIPK2	String	CMGC/DYRK	3	1.5
O95613	8	S	SGFGARLSPGSGGPE	O95613	PCNT	Q86Z02	HIPK1	String	CMGC/DYRK	3	1.5
O95613	8	S	SGFGARLSPGSGGPE	O95613	PCNT	Q8NE63	HIPK4	String	CMGC/DYRK	3	1.5
O95613	8	S	SGFGARLSPGSGGPE	O95613	PCNT	O43781	DYRK3	String	CMGC/DYRK	3	1.5
O95613	8	S	SGFGARLSPGSGGPE	O95613	PCNT	Q13627	DYRK1A	String	CMGC/DYRK	3	1.5
O95613	8	S	SGFGARLSPGSGGPE	O95613	PCNT	Q9Y463	DYRK1B	String	CMGC/DYRK	3	1.5
O95613	8	S	SGFGARLSPGSGGPE	O95613	PCNT	Q9H422	HIPK3	String	CMGC/DYRK	3	1.5
O95613	8	S	SGFGARLSPGSGGPE	O95613	PCNT	P06493	CDC2	String	CMGC/CDK/CDC2	2.07	1.58
O95613	8	S	SGFGARLSPGSGGPE	O95613	PCNT	P24941	CDK2	String	CMGC/CDK/CDC2	2.07	1.58
O95613	8	S	SGFGARLSPGSGGPE	O95613	PCNT	C7G533	AurB	String	Other/AUR/AUR-B	4.24	2.04
M0R1R1	8	S	KEVPRRKSLVGTPYW	O96013	PAK4	Q16512	PKN1	String	AGC	3.69	1.94
M0R1R1	8	S	KEVPRRKSLVGTPYW	O96013	PAK4	Q16513	PKN2	String	AGC	3.69	1.94
M0R1R1	8	S	KEVPRRKSLVGTPYW	O96013	PAK4	Q86UX6	YANK3	String	AGC	3.69	1.94
M0R1R1	8	S	KEVPRRKSLVGTPYW	O96013	PAK4	Q96QS6	PSKH2	String	CAMK	2.72	1.17
M0R1R1	8	S	KEVPRRKSLVGTPYW	O96013	PAK4	Q92519	Trb2	String	CAMK	2.72	1.17
M0R1R1	8	S	KEVPRRKSLVGTPYW	O96013	PAK4	Q86V86	PIM3	String	CAMK	2.72	1.17
M0R1R1	8	S	KEVPRRKSLVGTPYW	O96013	PAK4	O60229	Trad	String	CAMK	2.72	1.17
M0R1R1	8	S	KEVPRRKSLVGTPYW	O96013	PAK4	P11801	PSKH1	String	CAMK	2.72	1.17
M0R1R1	8	S	KEVPRRKSLVGTPYW	O96013	PAK4	Q96PN8	TSSK3	String	CAMK	2.72	1.17
M0R1R1	8	S	KEVPRRKSLVGTPYW	O96013	PAK4	Q96PF2	TSSK2	String	CAMK	2.72	1.17
M0R1R1	8	S	KEVPRRKSLVGTPYW	O96013	PAK4	B2RDF9	VACAMKL	String	CAMK	2.72	1.17
M0R1R1	8	S	KEVPRRKSLVGTPYW	O96013	PAK4	Q9P1W9	PIM2	String	CAMK	2.72	1.17
M0R1R1	8	S	KEVPRRKSLVGTPYW	O96013	PAK4	P11309	PIM1	String	CAMK	2.72	1.17
M0R1R1	8	S	KEVPRRKSLVGTPYW	O96013	PAK4	O75116	ROCK2	String	AGC/DMPK	3.13	1.46
M0R1R1	8	S	KEVPRRKSLVGTPYW	O96013	PAK4	Q13464	ROCK1	String	AGC/DMPK	3.13	1.46
M0R1R1	8	S	KEVPRRKSLVGTPYW	O96013	PAK4	Q5VT25	MRCKa	String	AGC/DMPK	3.13	1.46
M0R1R1	8	S	KEVPRRKSLVGTPYW	O96013	PAK4	Q09013	DMPK1	String	AGC/DMPK	3.13	1.46
M0R1R1	8	S	KEVPRRKSLVGTPYW	O96013	PAK4	Q9Y5S2	MRCKb	String	AGC/DMPK	3.13	1.46
M0R1R1	8	S	KEVPRRKSLVGTPYW	O96013	PAK4	O15530	PDK1	String	AGC/PKB	8.62	1.6
M0R1R1	8	S	KEVPRRKSLVGTPYW	O96013	PAK4	Q14012	CaMK1a	String	CAMK/CAMK1	2.65	1.75
M0R1R1	8	S	KEVPRRKSLVGTPYW	O96013	PAK4	B4E1A6	CaMK1b	String	CAMK/CAMK1	2.65	1.75
M0R1R1	8	S	KEVPRRKSLVGTPYW	O96013	PAK4	Q16566	CaMK4	String	CAMK/CAMK1	2.65	1.75
M0R1R1	8	S	KEVPRRKSLVGTPYW	O96013	PAK4	Q96NX5	CaMK1g	String	CAMK/CAMK1	2.65	1.75
M0R1R1	8	S	KEVPRRKSLVGTPYW	O96013	PAK4	Q13555	CaMK2g	String	CAMK/CAMK2	2.65	1.56
M0R1R1	8	S	KEVPRRKSLVGTPYW	O96013	PAK4	Q13554	CaMK2b	String	CAMK/CAMK2	2.65	1.56
M0R1R1	8	S	KEVPRRKSLVGTPYW	O96013	PAK4	Q13557	CaMK2d	String	CAMK/CAMK2	2.65	1.56
M0R1R1	8	S	KEVPRRKSLVGTPYW	O96013	PAK4	Q96L34	MARK4	String	CAMK/CAMKL	2.36	1.28
M0R1R1	8	S	KEVPRRKSLVGTPYW	O96013	PAK4	O60285	NuaK1	String	CAMK/CAMKL	2.36	1.28
M0R1R1	8	S	KEVPRRKSLVGTPYW	O96013	PAK4	Q9Y2K2	QSK	String	CAMK/CAMKL	2.36	1.28
M0R1R1	8	S	KEVPRRKSLVGTPYW	O96013	PAK4	Q8IY84	NIM1	String	CAMK/CAMKL	2.36	1.28
M0R1R1	8	S	KEVPRRKSLVGTPYW	O96013	PAK4	P27448	MARK3	String	CAMK/CAMKL	2.36	1.28
M0R1R1	8	S	KEVPRRKSLVGTPYW	O96013	PAK4	Q96RG2	PASK	String	CAMK/CAMKL	2.36	1.28
M0R1R1	8	S	KEVPRRKSLVGTPYW	O96013	PAK4	B4E0Y5	NuaK2	String	CAMK/CAMKL	2.36	1.28
M0R1R1	8	S	KEVPRRKSLVGTPYW	O96013	PAK4	Q9NRH2	SNRK	String	CAMK/CAMKL	2.36	1.28
M0R1R1	8	S	KEVPRRKSLVGTPYW	O96013	PAK4	Q7KZI7	MARK2	String	CAMK/CAMKL	2.36	1.28
M0R1R1	8	S	KEVPRRKSLVGTPYW	O96013	PAK4	Q8IWQ3	BRSK2	String	CAMK/CAMKL	2.36	1.28
M0R1R1	8	S	KEVPRRKSLVGTPYW	O96013	PAK4	O43293	DAPK3	String	CAMK/DAPK	2.79	2.15
M0R1R1	8	S	KEVPRRKSLVGTPYW	O96013	PAK4	Q59H88	DAPK1	String	CAMK/DAPK	2.79	2.15
M0R1R1	8	S	KEVPRRKSLVGTPYW	O96013	PAK4	O94768	DRAK2	String	CAMK/DAPK	2.79	2.15
M0R1R1	8	S	KEVPRRKSLVGTPYW	O96013	PAK4	Q9UIK4	DAPK2	String	CAMK/DAPK	2.79	2.15
M0R1R1	8	S	KEVPRRKSLVGTPYW	O96013	PAK4	O96017	CHK2	String	CAMK/RAD53	4.24	1.77
M0R1R1	8	S	KEVPRRKSLVGTPYW	O96013	PAK4	Q9UEW8	STLK3	String	STE/STE20	4.9	1.4
M0R1R1	8	S	KEVPRRKSLVGTPYW	O96013	PAK4	Q5U0E6	MST3	String	STE/STE20	4.9	1.4
M0R1R1	8	S	KEVPRRKSLVGTPYW	O96013	PAK4	Q13043	MST1	String	STE/STE20	4.9	1.4
M0R1R1	8	S	KEVPRRKSLVGTPYW	O96013	PAK4	B2RCU6	PAK3	String	STE/STE20	4.9	1.4
M0R1R1	8	S	KEVPRRKSLVGTPYW	O96013	PAK4	Q12851	GCK	String	STE/STE20	4.9	1.4
M0R1R1	8	S	KEVPRRKSLVGTPYW	O96013	PAK4	Q9NQU5	PAK6	String	STE/STE20	4.9	1.4
M0R1R1	8	S	KEVPRRKSLVGTPYW	O96013	PAK4	Q9UKE5	TNIK	String	STE/STE20	4.9	1.4
M0R1R1	8	S	KEVPRRKSLVGTPYW	O96013	PAK4	Q13188	MST2	String	STE/STE20	4.9	1.4
M0R1R1	8	S	KEVPRRKSLVGTPYW	O96013	PAK4	Q7L7X3	TAO1	String	STE/STE20	4.9	1.4
M0R1R1	8	S	KEVPRRKSLVGTPYW	O96013	PAK4	Q9Y4K4	KHS1	String	STE/STE20	4.9	1.4
M0R1R1	8	S	KEVPRRKSLVGTPYW	O96013	PAK4	Q8NEV4	MYO3A	String	STE/STE20	4.9	1.4
M0R1R1	8	S	KEVPRRKSLVGTPYW	O96013	PAK4	Q9H2K8	TAO3	String	STE/STE20	4.9	1.4
M0R1R1	8	S	KEVPRRKSLVGTPYW	O96013	PAK4	Q53TX8	HGK	String	STE/STE20	4.9	1.4
M0R1R1	8	S	KEVPRRKSLVGTPYW	O96013	PAK4	D3DRA1	SLK	String	STE/STE20	4.9	1.4
M0R1R1	8	S	KEVPRRKSLVGTPYW	O96013	PAK4	Q13153	PAK1	String	STE/STE20	4.9	1.4
M0R1R1	8	S	KEVPRRKSLVGTPYW	O96013	PAK4	Q8N4C8	MINK	String	STE/STE20	4.9	1.4
M0R1R1	8	S	KEVPRRKSLVGTPYW	O96013	PAK4	Q9C0K7	STLK6	String	STE/STE20	4.9	1.4
M0R1R1	8	S	KEVPRRKSLVGTPYW	O96013	PAK4	O96013	PAK4	Exp.	STE/STE20	4.9	1.4
M0R1R1	8	S	KEVPRRKSLVGTPYW	O96013	PAK4	Q92918	HPK1	Exp.	STE/STE20	4.9	1.4
M0R1R1	8	S	KEVPRRKSLVGTPYW	O96013	PAK4	O00506	YSK1	String	STE/STE20	4.9	1.4
M0R1R1	8	S	KEVPRRKSLVGTPYW	O96013	PAK4	Q13177	PAK2	String	STE/STE20	4.9	1.4
M0R1R1	8	S	KEVPRRKSLVGTPYW	O96013	PAK4	O94804	LOK	String	STE/STE20	4.9	1.4
M0R1R1	8	S	KEVPRRKSLVGTPYW	O96013	PAK4	Q7RTN6	STLK5	String	STE/STE20	4.9	1.4
M0R1R1	8	S	KEVPRRKSLVGTPYW	O96013	PAK4	C9J3X5	MYO3B	String	STE/STE20	4.9	1.4
M0R1R1	8	S	KEVPRRKSLVGTPYW	O96013	PAK4	Q8IVH8	KHS2	String	STE/STE20	4.9	1.4
M0R1R1	8	S	KEVPRRKSLVGTPYW	O96013	PAK4	Q9P286	PAK5	String	STE/STE20	4.9	1.4
M0R1R1	8	S	KEVPRRKSLVGTPYW	O96013	PAK4	O95747	OSR1	String	STE/STE20	4.9	1.4
M0R1R1	8	S	KEVPRRKSLVGTPYW	O96013	PAK4	Q9P289	MST4	String	STE/STE20	4.9	1.4
M0R1R1	8	S	KEVPRRKSLVGTPYW	O96013	PAK4	Q7Z2Y5	NRK	String	STE/STE20	4.9	1.4
M0R1R1	8	S	KEVPRRKSLVGTPYW	O96013	PAK4	P04049	RAF1	String	TKL/RAF	2.4	2
M0R1R1	8	S	KEVPRRKSLVGTPYW	O96013	PAK4	Q8IVT5	KSR1	String	TKL/RAF	2.4	2
M0R1R1	8	S	KEVPRRKSLVGTPYW	O96013	PAK4	P10398	ARAF	String	TKL/RAF	2.4	2
M0R1R1	8	S	KEVPRRKSLVGTPYW	O96013	PAK4	Q6VAB6	KSR2	String	TKL/RAF	2.4	2
M0R1R1	8	S	KEVPRRKSLVGTPYW	O96013	PAK4	P15056	BRAF	String	TKL/RAF	2.4	2
M0R1R1	8	S	KEVPRRKSLVGTPYW	O96013	PAK4	B7Z2D9	NEK6	String	Other/NEK	9.23	2.22
M0R1R1	8	S	KEVPRRKSLVGTPYW	O96013	PAK4	P51956	NEK3	String	Other/NEK	9.23	2.22
M0R1R1	8	S	KEVPRRKSLVGTPYW	O96013	PAK4	P51957	NEK4	String	Other/NEK	9.23	2.22
M0R1R1	8	S	KEVPRRKSLVGTPYW	O96013	PAK4	P51955	NEK2	String	Other/NEK	9.23	2.22
M0R1R1	8	S	KEVPRRKSLVGTPYW	O96013	PAK4	Q8TD19	NEK9	String	Other/NEK	9.23	2.22
M0R1R1	8	S	KEVPRRKSLVGTPYW	O96013	PAK4	Q6ZWH5	NEK10	String	Other/NEK	9.23	2.22
M0R1R1	8	S	KEVPRRKSLVGTPYW	O96013	PAK4	Q8TDX7	NEK7	String	Other/NEK	9.23	2.22
M0R1R1	8	S	KEVPRRKSLVGTPYW	O96013	PAK4	Q86SG6	NEK8	String	Other/NEK	9.23	2.22
M0R1R1	8	S	KEVPRRKSLVGTPYW	O96013	PAK4	O75116	ROCK2	String	AGC/DMPK/ROCK	3.45	1.78
M0R1R1	8	S	KEVPRRKSLVGTPYW	O96013	PAK4	Q13464	ROCK1	String	AGC/DMPK/ROCK	3.45	1.78
M0R1R1	8	S	KEVPRRKSLVGTPYW	O96013	PAK4	O14965	AurA	String	Other/AUR/AUR-A	2.11	1.71
O96028	8	T	HPDIGKSTPQKTAEA	O96028	WHSC1	P27361	Erk1	String	CMGC/MAPK	1.8	1.17
O96028	8	T	HPDIGKSTPQKTAEA	O96028	WHSC1	Q13164	Erk5	String	CMGC/MAPK	1.8	1.17
O96028	8	T	HPDIGKSTPQKTAEA	O96028	WHSC1	Q16659	Erk3	String	CMGC/MAPK	1.8	1.17
O96028	8	T	HPDIGKSTPQKTAEA	O96028	WHSC1	A8MTD8	JNK3	String	CMGC/MAPK	1.8	1.17
O96028	8	T	HPDIGKSTPQKTAEA	O96028	WHSC1	D3DX92	JNK1	String	CMGC/MAPK	1.8	1.17
O96028	8	T	HPDIGKSTPQKTAEA	O96028	WHSC1	Q15759	p38b	String	CMGC/MAPK	1.8	1.17
O96028	8	T	HPDIGKSTPQKTAEA	O96028	WHSC1	P45984	JNK2	String	CMGC/MAPK	1.8	1.17
O96028	8	T	HPDIGKSTPQKTAEA	O96028	WHSC1	P28482	Erk2	String	CMGC/MAPK	1.8	1.17
O96028	8	T	HPDIGKSTPQKTAEA	O96028	WHSC1	Q16539	p38a	String	CMGC/MAPK	1.8	1.17
O96028	8	T	HPDIGKSTPQKTAEA	O96028	WHSC1	O15264	p38d	String	CMGC/MAPK	1.8	1.17
O96028	8	T	HPDIGKSTPQKTAEA	O96028	WHSC1	P42345	FRAP	String	Atypical/PIKK/FRAP	3.8	2.79
B7Z7A9	8	S	YFAKALESPERPFLA	P00558	PGK1	P50750	CDK9	String	CMGC/CDK	1.6	1.11
B7Z7A9	8	S	YFAKALESPERPFLA	P00558	PGK1	Q8IZL9	CCRK	String	CMGC/CDK	1.6	1.11
B7Z7A9	8	S	YFAKALESPERPFLA	P00558	PGK1	B4DK03	PCTAIRE3	String	CMGC/CDK	1.6	1.11
B7Z7A9	8	S	YFAKALESPERPFLA	P00558	PGK1	P50613	CDK7	String	CMGC/CDK	1.6	1.11
B7Z7A9	8	S	YFAKALESPERPFLA	P00558	PGK1	Q14004	CHED	String	CMGC/CDK	1.6	1.11
B7Z7A9	8	S	YFAKALESPERPFLA	P00558	PGK1	Q96Q40	PFTAIRE2	String	CMGC/CDK	1.6	1.11
B7Z7A9	8	S	YFAKALESPERPFLA	P00558	PGK1	Q9NYV4	CRK7	String	CMGC/CDK	1.6	1.11
B7Z7A9	8	S	YFAKALESPERPFLA	P00558	PGK1	P11802	CDK4	String	CMGC/CDK	1.6	1.11
B7Z7A9	8	S	YFAKALESPERPFLA	P00558	PGK1	Q00537	PCTAIRE2	String	CMGC/CDK	1.6	1.11
B7Z7A9	8	S	YFAKALESPERPFLA	P00558	PGK1	Q00536	PCTAIRE1	String	CMGC/CDK	1.6	1.11
B7Z7A9	8	S	YFAKALESPERPFLA	P00558	PGK1	Q00535	CDK5	String	CMGC/CDK	1.6	1.11
B7Z7A9	8	S	YFAKALESPERPFLA	P00558	PGK1	Q00534	CDK6	String	CMGC/CDK	1.6	1.11
B7Z7A9	8	S	YFAKALESPERPFLA	P00558	PGK1	O94921	PFTAIRE1	String	CMGC/CDK	1.6	1.11
B7Z7A9	8	S	YFAKALESPERPFLA	P00558	PGK1	Q92630	DYRK2	String	CMGC/DYRK	1.92	1.5
B7Z7A9	8	S	YFAKALESPERPFLA	P00558	PGK1	Q9NR20	DYRK4	String	CMGC/DYRK	1.92	1.5
B7Z7A9	8	S	YFAKALESPERPFLA	P00558	PGK1	Q9H2X6	HIPK2	String	CMGC/DYRK	1.92	1.5
B7Z7A9	8	S	YFAKALESPERPFLA	P00558	PGK1	Q86Z02	HIPK1	String	CMGC/DYRK	1.92	1.5
B7Z7A9	8	S	YFAKALESPERPFLA	P00558	PGK1	Q8NE63	HIPK4	String	CMGC/DYRK	1.92	1.5
B7Z7A9	8	S	YFAKALESPERPFLA	P00558	PGK1	O43781	DYRK3	String	CMGC/DYRK	1.92	1.5
B7Z7A9	8	S	YFAKALESPERPFLA	P00558	PGK1	Q13627	DYRK1A	String	CMGC/DYRK	1.92	1.5
B7Z7A9	8	S	YFAKALESPERPFLA	P00558	PGK1	Q9Y463	DYRK1B	String	CMGC/DYRK	1.92	1.5
B7Z7A9	8	S	YFAKALESPERPFLA	P00558	PGK1	Q9H422	HIPK3	String	CMGC/DYRK	1.92	1.5
B7Z7A9	8	S	YFAKALESPERPFLA	P00558	PGK1	P27361	Erk1	String	CMGC/MAPK	1.56	1.17
B7Z7A9	8	S	YFAKALESPERPFLA	P00558	PGK1	Q13164	Erk5	String	CMGC/MAPK	1.56	1.17
B7Z7A9	8	S	YFAKALESPERPFLA	P00558	PGK1	Q16659	Erk3	String	CMGC/MAPK	1.56	1.17
B7Z7A9	8	S	YFAKALESPERPFLA	P00558	PGK1	A8MTD8	JNK3	String	CMGC/MAPK	1.56	1.17
B7Z7A9	8	S	YFAKALESPERPFLA	P00558	PGK1	D3DX92	JNK1	String	CMGC/MAPK	1.56	1.17
B7Z7A9	8	S	YFAKALESPERPFLA	P00558	PGK1	Q15759	p38b	String	CMGC/MAPK	1.56	1.17
B7Z7A9	8	S	YFAKALESPERPFLA	P00558	PGK1	P45984	JNK2	String	CMGC/MAPK	1.56	1.17
B7Z7A9	8	S	YFAKALESPERPFLA	P00558	PGK1	P28482	Erk2	String	CMGC/MAPK	1.56	1.17
B7Z7A9	8	S	YFAKALESPERPFLA	P00558	PGK1	Q16539	p38a	String	CMGC/MAPK	1.56	1.17
B7Z7A9	8	S	YFAKALESPERPFLA	P00558	PGK1	O15264	p38d	String	CMGC/MAPK	1.56	1.17
B7Z7A9	8	S	YFAKALESPERPFLA	P00558	PGK1	P42345	FRAP	String	Atypical/PIKK/FRAP	4.27	2.79
P02545	8	S	SYLLGNSSPRTQSPQ	P02545	LMNA	Q9UQ07	MOK	String	CMGC	2.75	1.46
P02545	8	S	SYLLGNSSPRTQSPQ	P02545	LMNA	Q96SB4	SRPK1	String	CMGC	2.75	1.46
P02545	8	S	SYLLGNSSPRTQSPQ	P02545	LMNA	Q8IVW4	CDKL3	String	CMGC	2.75	1.46
P02545	8	S	SYLLGNSSPRTQSPQ	P02545	LMNA	B4DH08	CDKL2	String	CMGC	2.75	1.46
P02545	8	S	SYLLGNSSPRTQSPQ	P02545	LMNA	O76039	CDKL5	String	CMGC	2.75	1.46
P02545	8	S	SYLLGNSSPRTQSPQ	P02545	LMNA	C9JQJ0	SRPK2	String	CMGC	2.75	1.46
P02545	8	S	SYLLGNSSPRTQSPQ	P02545	LMNA	P20794	MAK	String	CMGC	2.75	1.46
P02545	8	S	SYLLGNSSPRTQSPQ	P02545	LMNA	Q9HAZ1	CLK4	String	CMGC	2.75	1.46
P02545	8	S	SYLLGNSSPRTQSPQ	P02545	LMNA	Q59FC5	CLK3	String	CMGC	2.75	1.46
P02545	8	S	SYLLGNSSPRTQSPQ	P02545	LMNA	P49760	CLK2	String	CMGC	2.75	1.46
P02545	8	S	SYLLGNSSPRTQSPQ	P02545	LMNA	B4DFW7	CLK1	String	CMGC	2.75	1.46
P02545	8	S	SYLLGNSSPRTQSPQ	P02545	LMNA	Q2NME9	CDKL4	String	CMGC	2.75	1.46
P02545	8	S	SYLLGNSSPRTQSPQ	P02545	LMNA	Q9UPE1	MSSK1	String	CMGC	2.75	1.46
P02545	8	S	SYLLGNSSPRTQSPQ	P02545	LMNA	Q00532	CDKL1	String	CMGC	2.75	1.46
P02545	8	S	SYLLGNSSPRTQSPQ	P02545	LMNA	Q9UPZ9	ICK	String	CMGC	2.75	1.46
P02545	8	S	SYLLGNSSPRTQSPQ	P02545	LMNA	P27361	Erk1	String	CMGC/MAPK	1.85	1.17
P02545	8	S	SYLLGNSSPRTQSPQ	P02545	LMNA	Q13164	Erk5	String	CMGC/MAPK	1.85	1.17
P02545	8	S	SYLLGNSSPRTQSPQ	P02545	LMNA	Q16659	Erk3	String	CMGC/MAPK	1.85	1.17
P02545	8	S	SYLLGNSSPRTQSPQ	P02545	LMNA	A8MTD8	JNK3	String	CMGC/MAPK	1.85	1.17
P02545	8	S	SYLLGNSSPRTQSPQ	P02545	LMNA	D3DX92	JNK1	String	CMGC/MAPK	1.85	1.17
P02545	8	S	SYLLGNSSPRTQSPQ	P02545	LMNA	Q15759	p38b	String	CMGC/MAPK	1.85	1.17
P02545	8	S	SYLLGNSSPRTQSPQ	P02545	LMNA	P45984	JNK2	String	CMGC/MAPK	1.85	1.17
P02545	8	S	SYLLGNSSPRTQSPQ	P02545	LMNA	P28482	Erk2	String	CMGC/MAPK	1.85	1.17
P02545	8	S	SYLLGNSSPRTQSPQ	P02545	LMNA	Q16539	p38a	String	CMGC/MAPK	1.85	1.17
P02545	8	S	SYLLGNSSPRTQSPQ	P02545	LMNA	O15264	p38d	String	CMGC/MAPK	1.85	1.17
P02545	8	S	SYLLGNSSPRTQSPQ	P02545	LMNA	P06493	CDC2	String	CMGC/CDK/CDC2	3.05	1.58
P02545	8	S	SYLLGNSSPRTQSPQ	P02545	LMNA	P24941	CDK2	String	CMGC/CDK/CDC2	3.05	1.58
B4E0X2	8	S	VSSQHRYSTPHAFTF	P04049	RAF1	P22612	PKACg	String	AGC/PKA	1.91	1.81
B4E0X2	8	S	VSSQHRYSTPHAFTF	P04049	RAF1	P17612	PKACa	Exp.&String	AGC/PKA	1.91	1.81
B4E0X2	8	S	VSSQHRYSTPHAFTF	P04049	RAF1	P51817	PRKX	Exp.&String	AGC/PKA	1.91	1.81
B4E0X2	8	S	VSSQHRYSTPHAFTF	P04049	RAF1	P22694	PKACb	Exp.&String	AGC/PKA	1.91	1.81
B4E0X2	8	S	VSSQHRYSTPHAFTF	P04049	RAF1	B2RCU6	PAK3	Exp.	STE/STE20	1.44	1.4
B4E0X2	8	S	VSSQHRYSTPHAFTF	P04049	RAF1	Q12851	GCK	Exp.	STE/STE20	1.44	1.4
B4E0X2	8	S	VSSQHRYSTPHAFTF	P04049	RAF1	Q9NQU5	PAK6	String	STE/STE20	1.44	1.4
B4E0X2	8	S	VSSQHRYSTPHAFTF	P04049	RAF1	Q9UKE5	TNIK	String	STE/STE20	1.44	1.4
B4E0X2	8	S	VSSQHRYSTPHAFTF	P04049	RAF1	Q13188	MST2	Exp.&String	STE/STE20	1.44	1.4
B4E0X2	8	S	VSSQHRYSTPHAFTF	P04049	RAF1	Q7L7X3	TAO1	Exp.&String	STE/STE20	1.44	1.4
B4E0X2	8	S	VSSQHRYSTPHAFTF	P04049	RAF1	Q9Y4K4	KHS1	Exp.&String	STE/STE20	1.44	1.4
B4E0X2	8	S	VSSQHRYSTPHAFTF	P04049	RAF1	Q8NEV4	MYO3A	Exp.&String	STE/STE20	1.44	1.4
B4E0X2	8	S	VSSQHRYSTPHAFTF	P04049	RAF1	Q9H2K8	TAO3	Exp.&String	STE/STE20	1.44	1.4
B4E0X2	8	S	VSSQHRYSTPHAFTF	P04049	RAF1	Q53TX8	HGK	Exp.&String	STE/STE20	1.44	1.4
B4E0X2	8	S	VSSQHRYSTPHAFTF	P04049	RAF1	D3DRA1	SLK	Exp.&String	STE/STE20	1.44	1.4
B4E0X2	8	S	VSSQHRYSTPHAFTF	P04049	RAF1	Q13153	PAK1	Exp.	STE/STE20	1.44	1.4
B4E0X2	8	S	VSSQHRYSTPHAFTF	P04049	RAF1	Q8N4C8	MINK	Exp.	STE/STE20	1.44	1.4
B4E0X2	8	S	VSSQHRYSTPHAFTF	P04049	RAF1	Q9C0K7	STLK6	Exp.	STE/STE20	1.44	1.4
B4E0X2	8	S	VSSQHRYSTPHAFTF	P04049	RAF1	O96013	PAK4	String	STE/STE20	1.44	1.4
B4E0X2	8	S	VSSQHRYSTPHAFTF	P04049	RAF1	Q92918	HPK1	String	STE/STE20	1.44	1.4
B4E0X2	8	S	VSSQHRYSTPHAFTF	P04049	RAF1	O00506	YSK1	String	STE/STE20	1.44	1.4
B4E0X2	8	S	VSSQHRYSTPHAFTF	P04049	RAF1	Q13177	PAK2	Exp.&String	STE/STE20	1.44	1.4
B4E0X2	8	S	VSSQHRYSTPHAFTF	P04049	RAF1	O94804	LOK	Exp.&String	STE/STE20	1.44	1.4
B4E0X2	8	S	VSSQHRYSTPHAFTF	P04049	RAF1	Q7RTN6	STLK5	Exp.&String	STE/STE20	1.44	1.4
B4E0X2	8	S	VSSQHRYSTPHAFTF	P04049	RAF1	C9J3X5	MYO3B	Exp.&String	STE/STE20	1.44	1.4
B4E0X2	8	S	VSSQHRYSTPHAFTF	P04049	RAF1	Q8IVH8	KHS2	Exp.&String	STE/STE20	1.44	1.4
B4E0X2	8	S	VSSQHRYSTPHAFTF	P04049	RAF1	Q9P286	PAK5	String	STE/STE20	1.44	1.4
B4E0X2	8	S	VSSQHRYSTPHAFTF	P04049	RAF1	O95747	OSR1	String	STE/STE20	1.44	1.4
B4E0X2	8	S	VSSQHRYSTPHAFTF	P04049	RAF1	Q9P289	MST4	Exp.&String	STE/STE20	1.44	1.4
B4E0X2	8	S	VSSQHRYSTPHAFTF	P04049	RAF1	Q7Z2Y5	NRK	String	STE/STE20	1.44	1.4
B4E0X2	8	S	VSSQHRYSTPHAFTF	P04049	RAF1	P04049	RAF1	Exp.	TKL/RAF	4.4	2
B4E0X2	8	S	VSSQHRYSTPHAFTF	P04049	RAF1	Q8IVT5	KSR1	String	TKL/RAF	4.4	2
B4E0X2	8	S	VSSQHRYSTPHAFTF	P04049	RAF1	P10398	ARAF	String	TKL/RAF	4.4	2
B4E0X2	8	S	VSSQHRYSTPHAFTF	P04049	RAF1	Q6VAB6	KSR2	Exp.&String	TKL/RAF	4.4	2
B4E0X2	8	S	VSSQHRYSTPHAFTF	P04049	RAF1	P15056	BRAF	Exp.&String	TKL/RAF	4.4	2
B4E0X2	8	S	VSSQHRYSTPHAFTF	P04049	RAF1	P41279	COT	String	STE/STE-Unique/COT	4.4	1.86
B4E0X2	8	S	VSSQHRYSTPHAFTF	P04049	RAF1	C7G533	AurB	String	Other/AUR/AUR-B	2.41	2.04
P04049	8	S	FGYQRRASDDGKLTD	P04049	RAF1	Q96S38	RSKL1	String	AGC	3.66	1.94
P04049	8	S	FGYQRRASDDGKLTD	P04049	RAF1	Q15208	NDR1	String	AGC	3.66	1.94
P04049	8	S	FGYQRRASDDGKLTD	P04049	RAF1	O60307	MAST3	String	AGC	3.66	1.94
P04049	8	S	FGYQRRASDDGKLTD	P04049	RAF1	Q9Y2H9	MAST1	String	AGC	3.66	1.94
P04049	8	S	FGYQRRASDDGKLTD	P04049	RAF1	Q96GX5	MASTL	String	AGC	3.66	1.94
P04049	8	S	FGYQRRASDDGKLTD	P04049	RAF1	Q9Y6S9	RSKL2	String	AGC	3.66	1.94
P04049	8	S	FGYQRRASDDGKLTD	P04049	RAF1	Q96LW2	SgK494	String	AGC	3.66	1.94
P04049	8	S	FGYQRRASDDGKLTD	P04049	RAF1	Q9NY57	YANK2	String	AGC	3.66	1.94
P04049	8	S	FGYQRRASDDGKLTD	P04049	RAF1	Q9Y2H1	NDR2	String	AGC	3.66	1.94
P04049	8	S	FGYQRRASDDGKLTD	P04049	RAF1	Q9NRM7	LATS2	String	AGC	3.66	1.94
P04049	8	S	FGYQRRASDDGKLTD	P04049	RAF1	Q6P0Q8	MAST2	String	AGC	3.66	1.94
P04049	8	S	FGYQRRASDDGKLTD	P04049	RAF1	O95835	LATS1	String	AGC	3.66	1.94
P04049	8	S	FGYQRRASDDGKLTD	P04049	RAF1	Q6P5Z2	PKN3	String	AGC	3.66	1.94
P04049	8	S	FGYQRRASDDGKLTD	P04049	RAF1	Q8WU08	YANK1	String	AGC	3.66	1.94
P04049	8	S	FGYQRRASDDGKLTD	P04049	RAF1	Q16512	PKN1	String	AGC	3.66	1.94
P04049	8	S	FGYQRRASDDGKLTD	P04049	RAF1	Q16513	PKN2	String	AGC	3.66	1.94
P04049	8	S	FGYQRRASDDGKLTD	P04049	RAF1	Q86UX6	YANK3	String	AGC	3.66	1.94
P04049	8	S	FGYQRRASDDGKLTD	P04049	RAF1	P31749	AKT1	Exp.&String	AGC/AKT	1.84	1.64
P04049	8	S	FGYQRRASDDGKLTD	P04049	RAF1	O75116	ROCK2	String	AGC/DMPK	1.49	1.46
P04049	8	S	FGYQRRASDDGKLTD	P04049	RAF1	Q13464	ROCK1	String	AGC/DMPK	1.49	1.46
P04049	8	S	FGYQRRASDDGKLTD	P04049	RAF1	Q5VT25	MRCKa	String	AGC/DMPK	1.49	1.46
P04049	8	S	FGYQRRASDDGKLTD	P04049	RAF1	Q09013	DMPK1	Exp.	AGC/DMPK	1.49	1.46
P04049	8	S	FGYQRRASDDGKLTD	P04049	RAF1	Q9Y5S2	MRCKb	Exp.	AGC/DMPK	1.49	1.46
P04049	8	S	FGYQRRASDDGKLTD	P04049	RAF1	P22612	PKACg	String	AGC/PKA	5.1	1.81
P04049	8	S	FGYQRRASDDGKLTD	P04049	RAF1	P17612	PKACa	Exp.&String	AGC/PKA	5.1	1.81
P04049	8	S	FGYQRRASDDGKLTD	P04049	RAF1	P51817	PRKX	Exp.&String	AGC/PKA	5.1	1.81
P04049	8	S	FGYQRRASDDGKLTD	P04049	RAF1	P22694	PKACb	Exp.&String	AGC/PKA	5.1	1.81
P04049	8	S	FGYQRRASDDGKLTD	P04049	RAF1	P41743	PKCi	String	AGC/PKC	2.39	2.36
P04049	8	S	FGYQRRASDDGKLTD	P04049	RAF1	Q04759	PKCt	String	AGC/PKC	2.39	2.36
P04049	8	S	FGYQRRASDDGKLTD	P04049	RAF1	D3DWF5	PKCb	String	AGC/PKC	2.39	2.36
P04049	8	S	FGYQRRASDDGKLTD	P04049	RAF1	P17252	PKCa	Exp.&String	AGC/PKC	2.39	2.36
P04049	8	S	FGYQRRASDDGKLTD	P04049	RAF1	P05129	PKCg	String	AGC/PKC	2.39	2.36
P04049	8	S	FGYQRRASDDGKLTD	P04049	RAF1	Q05655	PKCd	Exp.&String	AGC/PKC	2.39	2.36
P04049	8	S	FGYQRRASDDGKLTD	P04049	RAF1	P24723	PKCh	Exp.&String	AGC/PKC	2.39	2.36
P04049	8	S	FGYQRRASDDGKLTD	P04049	RAF1	Q02156	PKCe	Exp.&String	AGC/PKC	2.39	2.36
P04049	8	S	FGYQRRASDDGKLTD	P04049	RAF1	Q05513	PKCz	Exp.&String	AGC/PKC	2.39	2.36
P04049	8	S	FGYQRRASDDGKLTD	P04049	RAF1	A5YM56	PKG1	Exp.&String	AGC/PKG	3.31	1.72
P04049	8	S	FGYQRRASDDGKLTD	P04049	RAF1	Q13555	CaMK2g	String	CAMK/CAMK2	3.06	1.56
P04049	8	S	FGYQRRASDDGKLTD	P04049	RAF1	Q13554	CaMK2b	String	CAMK/CAMK2	3.06	1.56
P04049	8	S	FGYQRRASDDGKLTD	P04049	RAF1	Q13557	CaMK2d	String	CAMK/CAMK2	3.06	1.56
P04049	8	S	FGYQRRASDDGKLTD	P04049	RAF1	C7G533	AurB	String	Other/AUR/AUR-B	2.97	2.04
P04083	8	S	GGPGSAVSPYPTFNP	P04083	ANXA1	C9JQJ0	SRPK2	String	CMGC	2.79	1.46
P04083	8	S	GGPGSAVSPYPTFNP	P04083	ANXA1	P20794	MAK	String	CMGC	2.79	1.46
P04083	8	S	GGPGSAVSPYPTFNP	P04083	ANXA1	Q9HAZ1	CLK4	String	CMGC	2.79	1.46
P04083	8	S	GGPGSAVSPYPTFNP	P04083	ANXA1	Q59FC5	CLK3	String	CMGC	2.79	1.46
P04083	8	S	GGPGSAVSPYPTFNP	P04083	ANXA1	P49760	CLK2	String	CMGC	2.79	1.46
P04083	8	S	GGPGSAVSPYPTFNP	P04083	ANXA1	B4DFW7	CLK1	String	CMGC	2.79	1.46
P04083	8	S	GGPGSAVSPYPTFNP	P04083	ANXA1	Q2NME9	CDKL4	String	CMGC	2.79	1.46
P04083	8	S	GGPGSAVSPYPTFNP	P04083	ANXA1	Q9UPE1	MSSK1	String	CMGC	2.79	1.46
P04083	8	S	GGPGSAVSPYPTFNP	P04083	ANXA1	Q00532	CDKL1	String	CMGC	2.79	1.46
P04083	8	S	GGPGSAVSPYPTFNP	P04083	ANXA1	Q9UPZ9	ICK	String	CMGC	2.79	1.46
P04083	8	S	GGPGSAVSPYPTFNP	P04083	ANXA1	P11802	CDK4	String	CMGC/CDK	1.8	1.11
P04083	8	S	GGPGSAVSPYPTFNP	P04083	ANXA1	Q00537	PCTAIRE2	String	CMGC/CDK	1.8	1.11
P04083	8	S	GGPGSAVSPYPTFNP	P04083	ANXA1	Q00536	PCTAIRE1	String	CMGC/CDK	1.8	1.11
P04083	8	S	GGPGSAVSPYPTFNP	P04083	ANXA1	Q00535	CDK5	String	CMGC/CDK	1.8	1.11
P04083	8	S	GGPGSAVSPYPTFNP	P04083	ANXA1	Q00534	CDK6	String	CMGC/CDK	1.8	1.11
P04083	8	S	GGPGSAVSPYPTFNP	P04083	ANXA1	O94921	PFTAIRE1	String	CMGC/CDK	1.8	1.11
P04083	8	S	GGPGSAVSPYPTFNP	P04083	ANXA1	P28482	Erk2	String	CMGC/MAPK	1.75	1.17
P04083	8	S	GGPGSAVSPYPTFNP	P04083	ANXA1	Q16539	p38a	String	CMGC/MAPK	1.75	1.17
P04083	8	S	GGPGSAVSPYPTFNP	P04083	ANXA1	O15264	p38d	String	CMGC/MAPK	1.75	1.17
P04083	8	S	GGPGSAVSPYPTFNP	P04083	ANXA1	D2JYI1	TGFbR2	String	TKL/STKR	4.56	2.12
P04083	8	S	GGPGSAVSPYPTFNP	P04083	ANXA1	Q13705	ACTR2B	String	TKL/STKR	4.56	2.12
P04083	8	S	GGPGSAVSPYPTFNP	P04083	ANXA1	Q13873	BMPR2	String	TKL/STKR	4.56	2.12
P04083	8	S	GGPGSAVSPYPTFNP	P04083	ANXA1	Q8NER5	ALK7	String	TKL/STKR	4.56	2.12
P04083	8	S	GGPGSAVSPYPTFNP	P04083	ANXA1	P27037	ACTR2	String	TKL/STKR	4.56	2.12
P04083	8	S	GGPGSAVSPYPTFNP	P04083	ANXA1	P24941	CDK2	String	CMGC/CDK/CDC2	2.34	1.58
P05771-2	8	T	TRHPPVLTPPDQEVI	D3DWF5	PKCb	Q9UQ07	MOK	String	CMGC	2.23	1.46
P05771-2	8	T	TRHPPVLTPPDQEVI	D3DWF5	PKCb	Q96SB4	SRPK1	String	CMGC	2.23	1.46
P05771-2	8	T	TRHPPVLTPPDQEVI	D3DWF5	PKCb	Q8IVW4	CDKL3	String	CMGC	2.23	1.46
P05771-2	8	T	TRHPPVLTPPDQEVI	D3DWF5	PKCb	B4DH08	CDKL2	String	CMGC	2.23	1.46
P05771-2	8	T	TRHPPVLTPPDQEVI	D3DWF5	PKCb	O76039	CDKL5	String	CMGC	2.23	1.46
P05771-2	8	T	TRHPPVLTPPDQEVI	D3DWF5	PKCb	C9JQJ0	SRPK2	String	CMGC	2.23	1.46
P05771-2	8	T	TRHPPVLTPPDQEVI	D3DWF5	PKCb	P20794	MAK	String	CMGC	2.23	1.46
P05771-2	8	T	TRHPPVLTPPDQEVI	D3DWF5	PKCb	Q9HAZ1	CLK4	String	CMGC	2.23	1.46
P05771-2	8	T	TRHPPVLTPPDQEVI	D3DWF5	PKCb	Q59FC5	CLK3	String	CMGC	2.23	1.46
P05771-2	8	T	TRHPPVLTPPDQEVI	D3DWF5	PKCb	P49760	CLK2	String	CMGC	2.23	1.46
P05771-2	8	T	TRHPPVLTPPDQEVI	D3DWF5	PKCb	B4DFW7	CLK1	String	CMGC	2.23	1.46
P05771-2	8	T	TRHPPVLTPPDQEVI	D3DWF5	PKCb	Q2NME9	CDKL4	String	CMGC	2.23	1.46
P05771-2	8	T	TRHPPVLTPPDQEVI	D3DWF5	PKCb	Q9UPE1	MSSK1	String	CMGC	2.23	1.46
P05771-2	8	T	TRHPPVLTPPDQEVI	D3DWF5	PKCb	Q00532	CDKL1	String	CMGC	2.23	1.46
P05771-2	8	T	TRHPPVLTPPDQEVI	D3DWF5	PKCb	Q9UPZ9	ICK	String	CMGC	2.23	1.46
P05771-2	8	T	TRHPPVLTPPDQEVI	D3DWF5	PKCb	Q00534	CDK6	String	CMGC/CDK	1.65	1.11
P05771-2	8	T	TRHPPVLTPPDQEVI	D3DWF5	PKCb	O94921	PFTAIRE1	String	CMGC/CDK	1.65	1.11
P05771-2	8	T	TRHPPVLTPPDQEVI	D3DWF5	PKCb	P49840	GSK3A	Exp.&String	CMGC/GSK	2.44	1.62
P05771-2	8	T	TRHPPVLTPPDQEVI	D3DWF5	PKCb	P53778	p38g	String	CMGC/MAPK	1.68	1.17
P05771-2	8	T	TRHPPVLTPPDQEVI	D3DWF5	PKCb	P27361	Erk1	String	CMGC/MAPK	1.68	1.17
P05771-2	8	T	TRHPPVLTPPDQEVI	D3DWF5	PKCb	Q13164	Erk5	String	CMGC/MAPK	1.68	1.17
P05771-2	8	T	TRHPPVLTPPDQEVI	D3DWF5	PKCb	Q16659	Erk3	Exp.&String	CMGC/MAPK	1.68	1.17
P05771-2	8	T	TRHPPVLTPPDQEVI	D3DWF5	PKCb	A8MTD8	JNK3	Exp.&String	CMGC/MAPK	1.68	1.17
P05771-2	8	T	TRHPPVLTPPDQEVI	D3DWF5	PKCb	D3DX92	JNK1	Exp.&String	CMGC/MAPK	1.68	1.17
P05771-2	8	T	TRHPPVLTPPDQEVI	D3DWF5	PKCb	Q15759	p38b	String	CMGC/MAPK	1.68	1.17
P05771-2	8	T	TRHPPVLTPPDQEVI	D3DWF5	PKCb	P45984	JNK2	String	CMGC/MAPK	1.68	1.17
P05771-2	8	T	TRHPPVLTPPDQEVI	D3DWF5	PKCb	P28482	Erk2	String	CMGC/MAPK	1.68	1.17
P05771-2	8	T	TRHPPVLTPPDQEVI	D3DWF5	PKCb	Q16539	p38a	String	CMGC/MAPK	1.68	1.17
P05771-2	8	T	TRHPPVLTPPDQEVI	D3DWF5	PKCb	O15264	p38d	String	CMGC/MAPK	1.68	1.17
P05771-2	8	T	TRHPPVLTPPDQEVI	D3DWF5	PKCb	B7Z2D9	NEK6	String	Other/NEK	3.77	2.22
P05771-2	8	T	TRHPPVLTPPDQEVI	D3DWF5	PKCb	P51956	NEK3	String	Other/NEK	3.77	2.22
P05771-2	8	T	TRHPPVLTPPDQEVI	D3DWF5	PKCb	P51957	NEK4	String	Other/NEK	3.77	2.22
P05771-2	8	T	TRHPPVLTPPDQEVI	D3DWF5	PKCb	P51955	NEK2	String	Other/NEK	3.77	2.22
P05771-2	8	T	TRHPPVLTPPDQEVI	D3DWF5	PKCb	Q8TD19	NEK9	String	Other/NEK	3.77	2.22
P05771-2	8	T	TRHPPVLTPPDQEVI	D3DWF5	PKCb	Q6ZWH5	NEK10	String	Other/NEK	3.77	2.22
P05771-2	8	T	TRHPPVLTPPDQEVI	D3DWF5	PKCb	Q8TDX7	NEK7	String	Other/NEK	3.77	2.22
P05771-2	8	T	TRHPPVLTPPDQEVI	D3DWF5	PKCb	Q86SG6	NEK8	String	Other/NEK	3.77	2.22
P05771-2	8	T	TRHPPVLTPPDQEVI	D3DWF5	PKCb	P06493	CDC2	String	CMGC/CDK/CDC2	2.79	1.58
P05771-2	8	T	TRHPPVLTPPDQEVI	D3DWF5	PKCb	P24941	CDK2	String	CMGC/CDK/CDC2	2.79	1.58
P05771-2	8	T	TRHPPVLTPPDQEVI	D3DWF5	PKCb	P42345	FRAP	String	Atypical/PIKK/FRAP	6.4	2.79
P06400	8	T	VNVIPPHTPVRTVMN	P06400	RB1	B4DH08	CDKL2	String	CMGC	3	1.46
P06400	8	T	VNVIPPHTPVRTVMN	P06400	RB1	O76039	CDKL5	String	CMGC	3	1.46
P06400	8	T	VNVIPPHTPVRTVMN	P06400	RB1	C9JQJ0	SRPK2	String	CMGC	3	1.46
P06400	8	T	VNVIPPHTPVRTVMN	P06400	RB1	P20794	MAK	String	CMGC	3	1.46
P06400	8	T	VNVIPPHTPVRTVMN	P06400	RB1	Q9HAZ1	CLK4	String	CMGC	3	1.46
P06400	8	T	VNVIPPHTPVRTVMN	P06400	RB1	Q59FC5	CLK3	String	CMGC	3	1.46
P06400	8	T	VNVIPPHTPVRTVMN	P06400	RB1	P49760	CLK2	String	CMGC	3	1.46
P06400	8	T	VNVIPPHTPVRTVMN	P06400	RB1	B4DFW7	CLK1	String	CMGC	3	1.46
P06400	8	T	VNVIPPHTPVRTVMN	P06400	RB1	Q2NME9	CDKL4	String	CMGC	3	1.46
P06400	8	T	VNVIPPHTPVRTVMN	P06400	RB1	Q9UPE1	MSSK1	String	CMGC	3	1.46
P06400	8	T	VNVIPPHTPVRTVMN	P06400	RB1	Q00532	CDKL1	String	CMGC	3	1.46
P06400	8	T	VNVIPPHTPVRTVMN	P06400	RB1	Q9UPZ9	ICK	String	CMGC	3	1.46
P06400	8	T	VNVIPPHTPVRTVMN	P06400	RB1	Q9BWU1	CDK11	String	CMGC/CDK	2.45	1.11
P06400	8	T	VNVIPPHTPVRTVMN	P06400	RB1	P21127	PITSLRE	String	CMGC/CDK	2.45	1.11
P06400	8	T	VNVIPPHTPVRTVMN	P06400	RB1	Q15131	CDK10	String	CMGC/CDK	2.45	1.11
P06400	8	T	VNVIPPHTPVRTVMN	P06400	RB1	P49336	CDK8	String	CMGC/CDK	2.45	1.11
P06400	8	T	VNVIPPHTPVRTVMN	P06400	RB1	P50750	CDK9	Exp.&String	CMGC/CDK	2.45	1.11
P06400	8	T	VNVIPPHTPVRTVMN	P06400	RB1	Q8IZL9	CCRK	Exp.&String	CMGC/CDK	2.45	1.11
P06400	8	T	VNVIPPHTPVRTVMN	P06400	RB1	B4DK03	PCTAIRE3	String	CMGC/CDK	2.45	1.11
P06400	8	T	VNVIPPHTPVRTVMN	P06400	RB1	P50613	CDK7	String	CMGC/CDK	2.45	1.11
P06400	8	T	VNVIPPHTPVRTVMN	P06400	RB1	Q14004	CHED	String	CMGC/CDK	2.45	1.11
P06400	8	T	VNVIPPHTPVRTVMN	P06400	RB1	Q96Q40	PFTAIRE2	String	CMGC/CDK	2.45	1.11
P06400	8	T	VNVIPPHTPVRTVMN	P06400	RB1	Q9NYV4	CRK7	String	CMGC/CDK	2.45	1.11
P06400	8	T	VNVIPPHTPVRTVMN	P06400	RB1	P11802	CDK4	Exp.&String	CMGC/CDK	2.45	1.11
P06400	8	T	VNVIPPHTPVRTVMN	P06400	RB1	Q00537	PCTAIRE2	String	CMGC/CDK	2.45	1.11
P06400	8	T	VNVIPPHTPVRTVMN	P06400	RB1	Q00536	PCTAIRE1	String	CMGC/CDK	2.45	1.11
P06400	8	T	VNVIPPHTPVRTVMN	P06400	RB1	Q00535	CDK5	String	CMGC/CDK	2.45	1.11
P06400	8	T	VNVIPPHTPVRTVMN	P06400	RB1	Q00534	CDK6	Exp.&String	CMGC/CDK	2.45	1.11
P06400	8	T	VNVIPPHTPVRTVMN	P06400	RB1	O94921	PFTAIRE1	Exp.&String	CMGC/CDK	2.45	1.11
P06400	8	T	VNVIPPHTPVRTVMN	P06400	RB1	Q92630	DYRK2	String	CMGC/DYRK	1.5	1.5
P06400	8	T	VNVIPPHTPVRTVMN	P06400	RB1	Q9NR20	DYRK4	String	CMGC/DYRK	1.5	1.5
P06400	8	T	VNVIPPHTPVRTVMN	P06400	RB1	Q9H2X6	HIPK2	String	CMGC/DYRK	1.5	1.5
P06400	8	T	VNVIPPHTPVRTVMN	P06400	RB1	Q86Z02	HIPK1	String	CMGC/DYRK	1.5	1.5
P06400	8	T	VNVIPPHTPVRTVMN	P06400	RB1	Q8NE63	HIPK4	String	CMGC/DYRK	1.5	1.5
P06400	8	T	VNVIPPHTPVRTVMN	P06400	RB1	O43781	DYRK3	String	CMGC/DYRK	1.5	1.5
P06400	8	T	VNVIPPHTPVRTVMN	P06400	RB1	Q13627	DYRK1A	String	CMGC/DYRK	1.5	1.5
P06400	8	T	VNVIPPHTPVRTVMN	P06400	RB1	Q9Y463	DYRK1B	String	CMGC/DYRK	1.5	1.5
P06400	8	T	VNVIPPHTPVRTVMN	P06400	RB1	Q9H422	HIPK3	String	CMGC/DYRK	1.5	1.5
P06400	8	T	VNVIPPHTPVRTVMN	P06400	RB1	P49840	GSK3A	String	CMGC/GSK	1.88	1.62
P06400	8	T	VNVIPPHTPVRTVMN	P06400	RB1	P27361	Erk1	String	CMGC/MAPK	2.91	1.17
P06400	8	T	VNVIPPHTPVRTVMN	P06400	RB1	Q13164	Erk5	String	CMGC/MAPK	2.91	1.17
P06400	8	T	VNVIPPHTPVRTVMN	P06400	RB1	Q16659	Erk3	String	CMGC/MAPK	2.91	1.17
P06400	8	T	VNVIPPHTPVRTVMN	P06400	RB1	A8MTD8	JNK3	String	CMGC/MAPK	2.91	1.17
P06400	8	T	VNVIPPHTPVRTVMN	P06400	RB1	D3DX92	JNK1	String	CMGC/MAPK	2.91	1.17
P06400	8	T	VNVIPPHTPVRTVMN	P06400	RB1	Q15759	p38b	String	CMGC/MAPK	2.91	1.17
P06400	8	T	VNVIPPHTPVRTVMN	P06400	RB1	P45984	JNK2	Exp.	CMGC/MAPK	2.91	1.17
P06400	8	T	VNVIPPHTPVRTVMN	P06400	RB1	P28482	Erk2	Exp.&String	CMGC/MAPK	2.91	1.17
P06400	8	T	VNVIPPHTPVRTVMN	P06400	RB1	Q16539	p38a	String	CMGC/MAPK	2.91	1.17
P06400	8	T	VNVIPPHTPVRTVMN	P06400	RB1	O15264	p38d	String	CMGC/MAPK	2.91	1.17
P06400	8	T	VNVIPPHTPVRTVMN	P06400	RB1	Q00526	CDK3	String	CMGC/CDK/CDC2	3.38	1.58
P06400	8	T	VNVIPPHTPVRTVMN	P06400	RB1	P06493	CDC2	Exp.&String	CMGC/CDK/CDC2	3.38	1.58
P06400	8	T	VNVIPPHTPVRTVMN	P06400	RB1	P24941	CDK2	Exp.&String	CMGC/CDK/CDC2	3.38	1.58
P06400	8	T	VNVIPPHTPVRTVMN	P06400	RB1	P42345	FRAP	String	Atypical/PIKK/FRAP	5.13	2.79
E5RIU6	8	Y	EKIGEGTYGVVYKGR	P06493	CDC2	Q59FK4	ABL1	String	TK/Abl	2.48	2.3
A6NMY6	8	Y	HSTPPSAYGSVKAYT	P07355	ANXA2	Q59FK4	ABL1	String	TK/Abl	2.62	2.3
A6NMY6	8	Y	HSTPPSAYGSVKAYT	P07355	ANXA2	P12931	SRC	Exp.&String	TK/Src	2.97	2.16
A6NMY6	8	Y	HSTPPSAYGSVKAYT	P07355	ANXA2	Q13882	BRK	Exp.&String	TK/Src	2.97	2.16
A6NMY6	8	Y	HSTPPSAYGSVKAYT	P07355	ANXA2	P42685	FRK	Exp.&String	TK/Src	2.97	2.16
A6NMY6	8	Y	HSTPPSAYGSVKAYT	P07355	ANXA2	Q9H3Y6	SRM	Exp.&String	TK/Src	2.97	2.16
A6NMY6	8	Y	HSTPPSAYGSVKAYT	P07355	ANXA2	P06241	FYN	String	TK/Src	2.97	2.16
A6NMY6	8	Y	HSTPPSAYGSVKAYT	P07355	ANXA2	P07947	YES	String	TK/Src	2.97	2.16
A6NMY6	8	Y	HSTPPSAYGSVKAYT	P07355	ANXA2	P09769	FGR	String	TK/Src	2.97	2.16
A6NMY6	8	Y	HSTPPSAYGSVKAYT	P07355	ANXA2	P07948	LYN	String	TK/Src	2.97	2.16
A6NMY6	8	S	TPPSAYGSVKAYTNF	P07355	ANXA2	D2JYI1	TGFbR2	String	TKL/STKR	2.89	2.12
A6NMY6	8	S	TPPSAYGSVKAYTNF	P07355	ANXA2	Q13705	ACTR2B	String	TKL/STKR	2.89	2.12
A6NMY6	8	S	TPPSAYGSVKAYTNF	P07355	ANXA2	Q13873	BMPR2	String	TKL/STKR	2.89	2.12
A6NMY6	8	S	TPPSAYGSVKAYTNF	P07355	ANXA2	Q8NER5	ALK7	String	TKL/STKR	2.89	2.12
A6NMY6	8	S	TPPSAYGSVKAYTNF	P07355	ANXA2	P27037	ACTR2	String	TKL/STKR	2.89	2.12
A6NMY6	8	T	SLEGDHSTPPSAYGS	P07355	ANXA2	B4DH08	CDKL2	String	CMGC	2.87	1.46
A6NMY6	8	T	SLEGDHSTPPSAYGS	P07355	ANXA2	O76039	CDKL5	String	CMGC	2.87	1.46
A6NMY6	8	T	SLEGDHSTPPSAYGS	P07355	ANXA2	C9JQJ0	SRPK2	String	CMGC	2.87	1.46
A6NMY6	8	T	SLEGDHSTPPSAYGS	P07355	ANXA2	P20794	MAK	String	CMGC	2.87	1.46
A6NMY6	8	T	SLEGDHSTPPSAYGS	P07355	ANXA2	Q9HAZ1	CLK4	String	CMGC	2.87	1.46
A6NMY6	8	T	SLEGDHSTPPSAYGS	P07355	ANXA2	Q59FC5	CLK3	String	CMGC	2.87	1.46
A6NMY6	8	T	SLEGDHSTPPSAYGS	P07355	ANXA2	P49760	CLK2	String	CMGC	2.87	1.46
A6NMY6	8	T	SLEGDHSTPPSAYGS	P07355	ANXA2	B4DFW7	CLK1	String	CMGC	2.87	1.46
A6NMY6	8	T	SLEGDHSTPPSAYGS	P07355	ANXA2	Q2NME9	CDKL4	String	CMGC	2.87	1.46
A6NMY6	8	T	SLEGDHSTPPSAYGS	P07355	ANXA2	Q9UPE1	MSSK1	String	CMGC	2.87	1.46
A6NMY6	8	T	SLEGDHSTPPSAYGS	P07355	ANXA2	Q00532	CDKL1	String	CMGC	2.87	1.46
A6NMY6	8	T	SLEGDHSTPPSAYGS	P07355	ANXA2	Q9UPZ9	ICK	String	CMGC	2.87	1.46
A6NMY6	8	T	SLEGDHSTPPSAYGS	P07355	ANXA2	P50613	CDK7	String	CMGC/CDK	1.89	1.11
A6NMY6	8	T	SLEGDHSTPPSAYGS	P07355	ANXA2	Q14004	CHED	String	CMGC/CDK	1.89	1.11
A6NMY6	8	T	SLEGDHSTPPSAYGS	P07355	ANXA2	Q96Q40	PFTAIRE2	String	CMGC/CDK	1.89	1.11
A6NMY6	8	T	SLEGDHSTPPSAYGS	P07355	ANXA2	Q9NYV4	CRK7	String	CMGC/CDK	1.89	1.11
A6NMY6	8	T	SLEGDHSTPPSAYGS	P07355	ANXA2	P11802	CDK4	String	CMGC/CDK	1.89	1.11
A6NMY6	8	T	SLEGDHSTPPSAYGS	P07355	ANXA2	Q00537	PCTAIRE2	String	CMGC/CDK	1.89	1.11
A6NMY6	8	T	SLEGDHSTPPSAYGS	P07355	ANXA2	Q00536	PCTAIRE1	String	CMGC/CDK	1.89	1.11
A6NMY6	8	T	SLEGDHSTPPSAYGS	P07355	ANXA2	Q00535	CDK5	String	CMGC/CDK	1.89	1.11
A6NMY6	8	T	SLEGDHSTPPSAYGS	P07355	ANXA2	Q00534	CDK6	String	CMGC/CDK	1.89	1.11
A6NMY6	8	T	SLEGDHSTPPSAYGS	P07355	ANXA2	O94921	PFTAIRE1	String	CMGC/CDK	1.89	1.11
A6NMY6	8	T	SLEGDHSTPPSAYGS	P07355	ANXA2	P28482	Erk2	String	CMGC/MAPK	1.86	1.17
A6NMY6	8	T	SLEGDHSTPPSAYGS	P07355	ANXA2	Q16539	p38a	String	CMGC/MAPK	1.86	1.17
A6NMY6	8	T	SLEGDHSTPPSAYGS	P07355	ANXA2	O15264	p38d	String	CMGC/MAPK	1.86	1.17
A6NMY6	8	T	SLEGDHSTPPSAYGS	P07355	ANXA2	P42345	FRAP	String	Atypical/PIKK/FRAP	4.07	2.79
P08559	8	S	TYRYHGHSMSDPGVS	P08559	PDHA1	Q15118	PDHK1	Exp.&String	Atypical/PDHK	29.25	2.26
P08559	8	S	TYRYHGHSMSDPGVS	P08559	PDHA1	Q15119	PDHK2	Exp.&String	Atypical/PDHK	29.25	2.26
P08559	8	S	TYRYHGHSMSDPGVS	P08559	PDHA1	Q16654	PDHK4	Exp.&String	Atypical/PDHK	29.25	2.26
P08559	8	S	TYRYHGHSMSDPGVS	P08559	PDHA1	B4DXG6	PDHK3	Exp.&String	Atypical/PDHK	29.25	2.26
P08559	8	S	TYRYHGHSMSDPGVS	P08559	PDHA1	O14874	BCKDK	Exp.&String	Atypical/PDHK	29.25	2.26
B4DPY6	8	Y	RDMYDKEYYSVHNKT	P08581	MET	Q9UM73	ALK	String	TK/Alk	3.67	1.73
B4DPY6	8	Y	RDMYDKEYYSVHNKT	P08581	MET	P29376	LTK	String	TK/Alk	3.67	1.73
B4DPY6	8	Y	RDMYDKEYYSVHNKT	P08581	MET	P11362	FGFR1	String	TK/FGFR	2.53	2.14
B4DPY6	8	Y	RDMYDKEYYSVHNKT	P08581	MET	P21802	FGFR2	String	TK/FGFR	2.53	2.14
B4DPY6	8	Y	RDMYDKEYYSVHNKT	P08581	MET	P22455	FGFR4	String	TK/FGFR	2.53	2.14
B4DPY6	8	Y	RDMYDKEYYSVHNKT	P08581	MET	P08069	IGF1R	String	TK/InsR	3.98	2.09
B4DPY6	8	Y	RDMYDKEYYSVHNKT	P08581	MET	P14616	IRR	String	TK/InsR	3.98	2.09
B4DPY6	8	Y	RDMYDKEYYSVHNKT	P08581	MET	P06213	INSR	String	TK/InsR	3.98	2.09
B4DPY6	8	Y	RDMYDKEYYSVHNKT	P08581	MET	Q04912	RON	String	TK/Met	8.7	2.67
B4DPY6	8	Y	RDMYDKEYYSVHNKT	P08581	MET	P08581	MET	Exp.	TK/Met	8.7	2.67
B4DPY6	8	Y	RDMYDKEYYSVHNKT	P08581	MET	P12931	SRC	Exp.&String	TK/Src	2.91	2.16
B4DPY6	8	Y	RDMYDKEYYSVHNKT	P08581	MET	Q13882	BRK	Exp.&String	TK/Src	2.91	2.16
B4DPY6	8	Y	RDMYDKEYYSVHNKT	P08581	MET	P42685	FRK	Exp.&String	TK/Src	2.91	2.16
B4DPY6	8	Y	RDMYDKEYYSVHNKT	P08581	MET	Q9H3Y6	SRM	Exp.&String	TK/Src	2.91	2.16
B4DPY6	8	Y	RDMYDKEYYSVHNKT	P08581	MET	P06241	FYN	String	TK/Src	2.91	2.16
B4DPY6	8	Y	RDMYDKEYYSVHNKT	P08581	MET	P07947	YES	String	TK/Src	2.91	2.16
B4DPY6	8	Y	RDMYDKEYYSVHNKT	P08581	MET	P09769	FGR	String	TK/Src	2.91	2.16
B4DPY6	8	Y	RDMYDKEYYSVHNKT	P08581	MET	P07948	LYN	String	TK/Src	2.91	2.16
B4DPY6	8	Y	RDMYDKEYYSVHNKT	P08581	MET	P35968	KDR	String	TK/VEGFR	2.89	2.22
B4DPY6	8	Y	RDMYDKEYYSVHNKT	P08581	MET	P35916	FLT4	String	TK/VEGFR	2.89	2.22
B4DPY6	8	Y	RDMYDKEYYSVHNKT	P08581	MET	P17948	FLT1	String	TK/VEGFR	2.89	2.22
B4DPY6	8	Y	RDMYDKEYYSVHNKT	P08581	MET	P10721	KIT	String	TK/PDGFR	3.59	2.32
B4DPY6	8	Y	RDMYDKEYYSVHNKT	P08581	MET	P36888	FLT3	String	TK/PDGFR	3.59	2.32
B4DPY6	8	Y	RDMYDKEYYSVHNKT	P08581	MET	P07333	FMS	String	TK/PDGFR	3.59	2.32
B4DPY6	8	Y	RDMYDKEYYSVHNKT	P08581	MET	P09619	PDGFRb	String	TK/PDGFR	3.59	2.32
B4DPY6	8	Y	RDMYDKEYYSVHNKT	P08581	MET	P16234	PDGFRa	String	TK/PDGFR	3.59	2.32
B4DPY6	8	Y	DMYDKEYYSVHNKTG	P08581	MET	Q9UM73	ALK	String	TK/Alk	2.33	1.73
B4DPY6	8	Y	DMYDKEYYSVHNKTG	P08581	MET	P29376	LTK	String	TK/Alk	2.33	1.73
B4DPY6	8	Y	DMYDKEYYSVHNKTG	P08581	MET	Q658W2	FAK	String	TK/Fak	4.38	3.26
B4DPY6	8	Y	DMYDKEYYSVHNKTG	P08581	MET	Q14289	PYK2	String	TK/Fak	4.38	3.26
B4DPY6	8	Y	DMYDKEYYSVHNKTG	P08581	MET	Q04912	RON	String	TK/Met	9.5	2.67
B4DPY6	8	Y	DMYDKEYYSVHNKTG	P08581	MET	P08581	MET	Exp.	TK/Met	9.5	2.67
P08581	8	S	PNSSQNGSCRQVQYP	P08581	MET	Q13627	DYRK1A	String	CMGC/DYRK	2.83	1.5
P08581	8	S	PNSSQNGSCRQVQYP	P08581	MET	Q9Y463	DYRK1B	String	CMGC/DYRK	2.83	1.5
P08581	8	S	PNSSQNGSCRQVQYP	P08581	MET	Q9H422	HIPK3	String	CMGC/DYRK	2.83	1.5
P08581	8	T	RYDARVHTPHLDRLV	P08581	MET	P42345	FRAP	String	Atypical/PIKK/FRAP	2.93	2.79
P08621	8	S	YDERPGPSPLPHRDR	P08621	SNRNP70	Q96SB4	SRPK1	Exp.&String	CMGC	1.78	1.46
P08621	8	S	YDERPGPSPLPHRDR	P08621	SNRNP70	Q8IVW4	CDKL3	Exp.&String	CMGC	1.78	1.46
P08621	8	S	YDERPGPSPLPHRDR	P08621	SNRNP70	B4DH08	CDKL2	Exp.&String	CMGC	1.78	1.46
P08621	8	S	YDERPGPSPLPHRDR	P08621	SNRNP70	O76039	CDKL5	Exp.&String	CMGC	1.78	1.46
P08621	8	S	YDERPGPSPLPHRDR	P08621	SNRNP70	C9JQJ0	SRPK2	String	CMGC	1.78	1.46
P08621	8	S	YDERPGPSPLPHRDR	P08621	SNRNP70	P20794	MAK	String	CMGC	1.78	1.46
P08621	8	S	YDERPGPSPLPHRDR	P08621	SNRNP70	Q9HAZ1	CLK4	String	CMGC	1.78	1.46
P08621	8	S	YDERPGPSPLPHRDR	P08621	SNRNP70	Q59FC5	CLK3	String	CMGC	1.78	1.46
P08621	8	S	YDERPGPSPLPHRDR	P08621	SNRNP70	P49760	CLK2	String	CMGC	1.78	1.46
P08621	8	S	YDERPGPSPLPHRDR	P08621	SNRNP70	B4DFW7	CLK1	String	CMGC	1.78	1.46
P08621	8	S	YDERPGPSPLPHRDR	P08621	SNRNP70	Q2NME9	CDKL4	String	CMGC	1.78	1.46
P08621	8	S	YDERPGPSPLPHRDR	P08621	SNRNP70	Q9UPE1	MSSK1	String	CMGC	1.78	1.46
P08621	8	S	YDERPGPSPLPHRDR	P08621	SNRNP70	Q00532	CDKL1	String	CMGC	1.78	1.46
P08621	8	S	YDERPGPSPLPHRDR	P08621	SNRNP70	Q9UPZ9	ICK	String	CMGC	1.78	1.46
P08621	8	S	YDERPGPSPLPHRDR	P08621	SNRNP70	Q00535	CDK5	String	CMGC/CDK	1.61	1.11
P08621	8	S	YDERPGPSPLPHRDR	P08621	SNRNP70	Q00534	CDK6	String	CMGC/CDK	1.61	1.11
P08621	8	S	YDERPGPSPLPHRDR	P08621	SNRNP70	O94921	PFTAIRE1	String	CMGC/CDK	1.61	1.11
P08621	8	S	YDERPGPSPLPHRDR	P08621	SNRNP70	P49841	GSK3B	Exp.	CMGC/GSK	1.65	1.62
P08621	8	S	YDERPGPSPLPHRDR	P08621	SNRNP70	P49840	GSK3A	Exp.	CMGC/GSK	1.65	1.62
P08621	8	S	YDERPGPSPLPHRDR	P08621	SNRNP70	P24941	CDK2	String	CMGC/CDK/CDC2	2	1.58
P08263	8	S	KKFLQPGSPRKPPMD	P09210	GSTA2	Q9UPZ9	ICK	String	CMGC	3.58	1.46
B7Z712	8	S	IIEQSWGSPKVTKDG	P10809	HSPD1	Q9UQ07	MOK	String	CMGC	1.89	1.46
B7Z712	8	S	IIEQSWGSPKVTKDG	P10809	HSPD1	Q96SB4	SRPK1	String	CMGC	1.89	1.46
B7Z712	8	S	IIEQSWGSPKVTKDG	P10809	HSPD1	Q8IVW4	CDKL3	String	CMGC	1.89	1.46
B7Z712	8	S	IIEQSWGSPKVTKDG	P10809	HSPD1	B4DH08	CDKL2	String	CMGC	1.89	1.46
B7Z712	8	S	IIEQSWGSPKVTKDG	P10809	HSPD1	O76039	CDKL5	String	CMGC	1.89	1.46
B7Z712	8	S	IIEQSWGSPKVTKDG	P10809	HSPD1	C9JQJ0	SRPK2	String	CMGC	1.89	1.46
B7Z712	8	S	IIEQSWGSPKVTKDG	P10809	HSPD1	P20794	MAK	String	CMGC	1.89	1.46
B7Z712	8	S	IIEQSWGSPKVTKDG	P10809	HSPD1	Q9HAZ1	CLK4	String	CMGC	1.89	1.46
B7Z712	8	S	IIEQSWGSPKVTKDG	P10809	HSPD1	Q59FC5	CLK3	String	CMGC	1.89	1.46
B7Z712	8	S	IIEQSWGSPKVTKDG	P10809	HSPD1	P49760	CLK2	String	CMGC	1.89	1.46
B7Z712	8	S	IIEQSWGSPKVTKDG	P10809	HSPD1	B4DFW7	CLK1	String	CMGC	1.89	1.46
B7Z712	8	S	IIEQSWGSPKVTKDG	P10809	HSPD1	Q2NME9	CDKL4	String	CMGC	1.89	1.46
B7Z712	8	S	IIEQSWGSPKVTKDG	P10809	HSPD1	Q9UPE1	MSSK1	String	CMGC	1.89	1.46
B7Z712	8	S	IIEQSWGSPKVTKDG	P10809	HSPD1	Q00532	CDKL1	String	CMGC	1.89	1.46
B7Z712	8	S	IIEQSWGSPKVTKDG	P10809	HSPD1	Q9UPZ9	ICK	String	CMGC	1.89	1.46
B7Z712	8	S	IIEQSWGSPKVTKDG	P10809	HSPD1	P50750	CDK9	Exp.	CMGC/CDK	1.65	1.11
B7Z712	8	S	IIEQSWGSPKVTKDG	P10809	HSPD1	Q8IZL9	CCRK	Exp.	CMGC/CDK	1.65	1.11
B7Z712	8	S	IIEQSWGSPKVTKDG	P10809	HSPD1	B4DK03	PCTAIRE3	Exp.	CMGC/CDK	1.65	1.11
B7Z712	8	S	IIEQSWGSPKVTKDG	P10809	HSPD1	P50613	CDK7	Exp.	CMGC/CDK	1.65	1.11
B7Z712	8	S	IIEQSWGSPKVTKDG	P10809	HSPD1	Q14004	CHED	Exp.	CMGC/CDK	1.65	1.11
B7Z712	8	S	IIEQSWGSPKVTKDG	P10809	HSPD1	Q96Q40	PFTAIRE2	Exp.	CMGC/CDK	1.65	1.11
B7Z712	8	S	IIEQSWGSPKVTKDG	P10809	HSPD1	Q9NYV4	CRK7	Exp.	CMGC/CDK	1.65	1.11
B7Z712	8	S	IIEQSWGSPKVTKDG	P10809	HSPD1	P11802	CDK4	Exp.	CMGC/CDK	1.65	1.11
B7Z712	8	S	IIEQSWGSPKVTKDG	P10809	HSPD1	Q00537	PCTAIRE2	Exp.	CMGC/CDK	1.65	1.11
B7Z712	8	S	IIEQSWGSPKVTKDG	P10809	HSPD1	Q00536	PCTAIRE1	Exp.	CMGC/CDK	1.65	1.11
B7Z712	8	S	IIEQSWGSPKVTKDG	P10809	HSPD1	Q00535	CDK5	Exp.	CMGC/CDK	1.65	1.11
B7Z712	8	S	IIEQSWGSPKVTKDG	P10809	HSPD1	Q00534	CDK6	Exp.	CMGC/CDK	1.65	1.11
B7Z712	8	S	IIEQSWGSPKVTKDG	P10809	HSPD1	O94921	PFTAIRE1	Exp.	CMGC/CDK	1.65	1.11
B7Z712	8	S	IIEQSWGSPKVTKDG	P10809	HSPD1	P27361	Erk1	String	CMGC/MAPK	1.42	1.17
B7Z712	8	S	IIEQSWGSPKVTKDG	P10809	HSPD1	Q13164	Erk5	String	CMGC/MAPK	1.42	1.17
B7Z712	8	S	IIEQSWGSPKVTKDG	P10809	HSPD1	Q16659	Erk3	String	CMGC/MAPK	1.42	1.17
B7Z712	8	S	IIEQSWGSPKVTKDG	P10809	HSPD1	A8MTD8	JNK3	String	CMGC/MAPK	1.42	1.17
B7Z712	8	S	IIEQSWGSPKVTKDG	P10809	HSPD1	D3DX92	JNK1	String	CMGC/MAPK	1.42	1.17
B7Z712	8	S	IIEQSWGSPKVTKDG	P10809	HSPD1	Q15759	p38b	String	CMGC/MAPK	1.42	1.17
B7Z712	8	S	IIEQSWGSPKVTKDG	P10809	HSPD1	P45984	JNK2	String	CMGC/MAPK	1.42	1.17
B7Z712	8	S	IIEQSWGSPKVTKDG	P10809	HSPD1	P28482	Erk2	String	CMGC/MAPK	1.42	1.17
B7Z712	8	S	IIEQSWGSPKVTKDG	P10809	HSPD1	Q16539	p38a	String	CMGC/MAPK	1.42	1.17
B7Z712	8	S	IIEQSWGSPKVTKDG	P10809	HSPD1	O15264	p38d	String	CMGC/MAPK	1.42	1.17
B7Z712	8	S	IIEQSWGSPKVTKDG	P10809	HSPD1	Q99558	NIK	String	STE/STE-Unique/NIK	7	2.51
P11388	8	S	GSVPLSSSPPATHFP	P11388	TOP2A	Q96SB4	SRPK1	Exp.	CMGC	3.03	1.46
P11388	8	S	GSVPLSSSPPATHFP	P11388	TOP2A	Q8IVW4	CDKL3	Exp.	CMGC	3.03	1.46
P11388	8	S	GSVPLSSSPPATHFP	P11388	TOP2A	B4DH08	CDKL2	Exp.	CMGC	3.03	1.46
P11388	8	S	GSVPLSSSPPATHFP	P11388	TOP2A	O76039	CDKL5	Exp.	CMGC	3.03	1.46
P11388	8	S	GSVPLSSSPPATHFP	P11388	TOP2A	C9JQJ0	SRPK2	Exp.	CMGC	3.03	1.46
P11388	8	S	GSVPLSSSPPATHFP	P11388	TOP2A	P20794	MAK	Exp.	CMGC	3.03	1.46
P11388	8	S	GSVPLSSSPPATHFP	P11388	TOP2A	Q9HAZ1	CLK4	Exp.	CMGC	3.03	1.46
P11388	8	S	GSVPLSSSPPATHFP	P11388	TOP2A	Q59FC5	CLK3	Exp.	CMGC	3.03	1.46
P11388	8	S	GSVPLSSSPPATHFP	P11388	TOP2A	P49760	CLK2	Exp.	CMGC	3.03	1.46
P11388	8	S	GSVPLSSSPPATHFP	P11388	TOP2A	B4DFW7	CLK1	Exp.	CMGC	3.03	1.46
P11388	8	S	GSVPLSSSPPATHFP	P11388	TOP2A	Q2NME9	CDKL4	Exp.	CMGC	3.03	1.46
P11388	8	S	GSVPLSSSPPATHFP	P11388	TOP2A	Q9UPE1	MSSK1	Exp.	CMGC	3.03	1.46
P11388	8	S	GSVPLSSSPPATHFP	P11388	TOP2A	Q00532	CDKL1	Exp.	CMGC	3.03	1.46
P11388	8	S	GSVPLSSSPPATHFP	P11388	TOP2A	Q9UPZ9	ICK	Exp.	CMGC	3.03	1.46
P11388	8	S	GSVPLSSSPPATHFP	P11388	TOP2A	P06493	CDC2	Exp.	CMGC/CDK/CDC2	3.3	1.58
P11388	8	S	GSVPLSSSPPATHFP	P11388	TOP2A	P24941	CDK2	Exp.	CMGC/CDK/CDC2	3.3	1.58
P12270	8	T	PTANIKPTPVVSTPS	Q99968	tpr	P28482	Erk2	Exp.	CMGC/MAPK	1.83	1.17
P12270	8	T	PTANIKPTPVVSTPS	Q99968	tpr	Q16539	p38a	Exp.	CMGC/MAPK	1.83	1.17
P12270	8	T	PTANIKPTPVVSTPS	Q99968	tpr	O15264	p38d	Exp.	CMGC/MAPK	1.83	1.17
P12270	8	S	GFAEAIHSPQVAGVP	Q99968	tpr	P28482	Erk2	Exp.	CMGC/MAPK	1.68	1.17
P12270	8	S	GFAEAIHSPQVAGVP	Q99968	tpr	Q16539	p38a	Exp.	CMGC/MAPK	1.68	1.17
P12270	8	S	GFAEAIHSPQVAGVP	Q99968	tpr	O15264	p38d	Exp.	CMGC/MAPK	1.68	1.17
B7Z806	8	S	RHSSPHQSEDEEDPR	P13807	GYS1	Q96RU7	Trb3	String	CAMK	1.32	1.17
B7Z806	8	S	RHSSPHQSEDEEDPR	P13807	GYS1	Q9C098	DCLK3	String	CAMK	1.32	1.17
B7Z806	8	S	RHSSPHQSEDEEDPR	P13807	GYS1	Q8N568	DCLK2	String	CAMK	1.32	1.17
B7Z806	8	S	RHSSPHQSEDEEDPR	P13807	GYS1	A6NGQ3	Obscn	String	CAMK	1.32	1.17
B7Z806	8	S	RHSSPHQSEDEEDPR	P13807	GYS1	Q15772	SPEG	String	CAMK	1.32	1.17
B7Z806	8	S	RHSSPHQSEDEEDPR	P13807	GYS1	Q6SA08	TSSK4	String	CAMK	1.32	1.17
B7Z806	8	S	RHSSPHQSEDEEDPR	P13807	GYS1	O15075	DCLK1	String	CAMK	1.32	1.17
B7Z806	8	S	RHSSPHQSEDEEDPR	P13807	GYS1	Q96QS6	PSKH2	String	CAMK	1.32	1.17
B7Z806	8	S	RHSSPHQSEDEEDPR	P13807	GYS1	Q92519	Trb2	String	CAMK	1.32	1.17
B7Z806	8	S	RHSSPHQSEDEEDPR	P13807	GYS1	Q86V86	PIM3	String	CAMK	1.32	1.17
B7Z806	8	S	RHSSPHQSEDEEDPR	P13807	GYS1	O60229	Trad	String	CAMK	1.32	1.17
B7Z806	8	S	RHSSPHQSEDEEDPR	P13807	GYS1	P11801	PSKH1	String	CAMK	1.32	1.17
B7Z806	8	S	RHSSPHQSEDEEDPR	P13807	GYS1	Q96PN8	TSSK3	String	CAMK	1.32	1.17
B7Z806	8	S	RHSSPHQSEDEEDPR	P13807	GYS1	Q96PF2	TSSK2	String	CAMK	1.32	1.17
B7Z806	8	S	RHSSPHQSEDEEDPR	P13807	GYS1	B2RDF9	VACAMKL	String	CAMK	1.32	1.17
B7Z806	8	S	RHSSPHQSEDEEDPR	P13807	GYS1	Q9P1W9	PIM2	String	CAMK	1.32	1.17
B7Z806	8	S	RHSSPHQSEDEEDPR	P13807	GYS1	P11309	PIM1	String	CAMK	1.32	1.17
B7Z806	8	S	RHSSPHQSEDEEDPR	P13807	GYS1	P49841	GSK3B	Exp.	CMGC/GSK	1.68	1.62
B7Z806	8	S	RHSSPHQSEDEEDPR	P13807	GYS1	P49840	GSK3A	String	CMGC/GSK	1.68	1.62
B7Z806	8	S	RHSSPHQSEDEEDPR	P13807	GYS1	Q16654	PDHK4	String	Atypical/PDHK	5.75	2.26
B7Z806	8	S	RHSSPHQSEDEEDPR	P13807	GYS1	B4DXG6	PDHK3	String	Atypical/PDHK	5.75	2.26
B7Z806	8	S	RHSSPHQSEDEEDPR	P13807	GYS1	O14874	BCKDK	String	Atypical/PDHK	5.75	2.26
B7Z806	8	S	RHSSPHQSEDEEDPR	P13807	GYS1	P19784	CK2a2	String	Other/CK2	12.27	3.57
B7Z806	8	S	RHSSPHQSEDEEDPR	P13807	GYS1	P68400	CK2a1	Exp.	Other/CK2	12.27	3.57
P13639	8	T	RIMGPNYTPGKKEDL	P13639	EEF2	P53778	p38g	String	CMGC/MAPK	1.43	1.17
P13639	8	T	RIMGPNYTPGKKEDL	P13639	EEF2	P27361	Erk1	String	CMGC/MAPK	1.43	1.17
P13639	8	T	RIMGPNYTPGKKEDL	P13639	EEF2	Q13164	Erk5	String	CMGC/MAPK	1.43	1.17
P13639	8	T	RIMGPNYTPGKKEDL	P13639	EEF2	Q16659	Erk3	String	CMGC/MAPK	1.43	1.17
P13639	8	T	RIMGPNYTPGKKEDL	P13639	EEF2	A8MTD8	JNK3	String	CMGC/MAPK	1.43	1.17
P13639	8	T	RIMGPNYTPGKKEDL	P13639	EEF2	D3DX92	JNK1	String	CMGC/MAPK	1.43	1.17
P13639	8	T	RIMGPNYTPGKKEDL	P13639	EEF2	Q15759	p38b	String	CMGC/MAPK	1.43	1.17
P13639	8	T	RIMGPNYTPGKKEDL	P13639	EEF2	P45984	JNK2	String	CMGC/MAPK	1.43	1.17
P13639	8	T	RIMGPNYTPGKKEDL	P13639	EEF2	P28482	Erk2	String	CMGC/MAPK	1.43	1.17
P13639	8	T	RIMGPNYTPGKKEDL	P13639	EEF2	Q16539	p38a	String	CMGC/MAPK	1.43	1.17
P13639	8	T	RIMGPNYTPGKKEDL	P13639	EEF2	O15264	p38d	String	CMGC/MAPK	1.43	1.17
P13639	8	T	RIMGPNYTPGKKEDL	P13639	EEF2	P06493	CDC2	String	CMGC/CDK/CDC2	2.43	1.58
P13639	8	T	RIMGPNYTPGKKEDL	P13639	EEF2	P24941	CDK2	String	CMGC/CDK/CDC2	2.43	1.58
H3BN34	8	S	MCRLDIDSPPITARN	P14618	PKM2	P27361	Erk1	String	CMGC/MAPK	1.45	1.17
H3BN34	8	S	MCRLDIDSPPITARN	P14618	PKM2	Q13164	Erk5	String	CMGC/MAPK	1.45	1.17
H3BN34	8	S	MCRLDIDSPPITARN	P14618	PKM2	Q16659	Erk3	String	CMGC/MAPK	1.45	1.17
H3BN34	8	S	MCRLDIDSPPITARN	P14618	PKM2	A8MTD8	JNK3	String	CMGC/MAPK	1.45	1.17
H3BN34	8	S	MCRLDIDSPPITARN	P14618	PKM2	D3DX92	JNK1	String	CMGC/MAPK	1.45	1.17
H3BN34	8	S	MCRLDIDSPPITARN	P14618	PKM2	Q15759	p38b	String	CMGC/MAPK	1.45	1.17
H3BN34	8	S	MCRLDIDSPPITARN	P14618	PKM2	P45984	JNK2	String	CMGC/MAPK	1.45	1.17
H3BN34	8	S	MCRLDIDSPPITARN	P14618	PKM2	P28482	Erk2	String	CMGC/MAPK	1.45	1.17
H3BN34	8	S	MCRLDIDSPPITARN	P14618	PKM2	Q16539	p38a	String	CMGC/MAPK	1.45	1.17
H3BN34	8	S	MCRLDIDSPPITARN	P14618	PKM2	O15264	p38d	String	CMGC/MAPK	1.45	1.17
H3BN34	8	T	DIDSPPITARNTGII	P14618	PKM2	Q15119	PDHK2	String	Atypical/PDHK	2.75	2.26
H3BN34	8	T	DIDSPPITARNTGII	P14618	PKM2	Q16654	PDHK4	String	Atypical/PDHK	2.75	2.26
H3BN34	8	T	DIDSPPITARNTGII	P14618	PKM2	B4DXG6	PDHK3	String	Atypical/PDHK	2.75	2.26
H3BN34	8	T	DIDSPPITARNTGII	P14618	PKM2	O14874	BCKDK	String	Atypical/PDHK	2.75	2.26
P15056	8	S	QFGQRDRSSSAPNVH	P15056	BRAF	P27448	MARK3	String	CAMK/CAMKL	1.63	1.28
P15056	8	S	QFGQRDRSSSAPNVH	P15056	BRAF	Q96RG2	PASK	String	CAMK/CAMKL	1.63	1.28
P15056	8	S	QFGQRDRSSSAPNVH	P15056	BRAF	B4E0Y5	NuaK2	String	CAMK/CAMKL	1.63	1.28
P15056	8	S	QFGQRDRSSSAPNVH	P15056	BRAF	Q9NRH2	SNRK	String	CAMK/CAMKL	1.63	1.28
P15056	8	S	QFGQRDRSSSAPNVH	P15056	BRAF	Q7KZI7	MARK2	String	CAMK/CAMKL	1.63	1.28
P15056	8	S	QFGQRDRSSSAPNVH	P15056	BRAF	Q8IWQ3	BRSK2	String	CAMK/CAMKL	1.63	1.28
P15056	8	S	QFGQRDRSSSAPNVH	P15056	BRAF	O96017	CHK2	String	CAMK/RAD53	1.94	1.77
P15056	8	S	QFGQRDRSSSAPNVH	P15056	BRAF	O14757	CHK1	String	CAMK/CAMKL/CHK1	3.71	1.72
B4DLR8	8	S	AYKEGHLSPDIVAEQ	P15559	NQO1	Q59FC5	CLK3	String	CMGC	1.86	1.46
B4DLR8	8	S	AYKEGHLSPDIVAEQ	P15559	NQO1	P49760	CLK2	String	CMGC	1.86	1.46
B4DLR8	8	S	AYKEGHLSPDIVAEQ	P15559	NQO1	B4DFW7	CLK1	String	CMGC	1.86	1.46
B4DLR8	8	S	AYKEGHLSPDIVAEQ	P15559	NQO1	Q2NME9	CDKL4	String	CMGC	1.86	1.46
B4DLR8	8	S	AYKEGHLSPDIVAEQ	P15559	NQO1	Q9UPE1	MSSK1	String	CMGC	1.86	1.46
B4DLR8	8	S	AYKEGHLSPDIVAEQ	P15559	NQO1	Q00532	CDKL1	String	CMGC	1.86	1.46
B4DLR8	8	S	AYKEGHLSPDIVAEQ	P15559	NQO1	Q9UPZ9	ICK	String	CMGC	1.86	1.46
P15924	8	S	PSPYNMSSAPGSRSG	P15924	DSP	Q7Z2Y5	NRK	String	STE/STE20	1.54	1.4
P15924	8	S	PSPYNMSSAPGSRSG	P15924	DSP	P36897	TGFbR1	String	TKL/STKR	3.22	2.12
P15924	8	S	PSPYNMSSAPGSRSG	P15924	DSP	Q16671	MISR2	String	TKL/STKR	3.22	2.12
P15924	8	S	PSPYNMSSAPGSRSG	P15924	DSP	P36896	ALK4	String	TKL/STKR	3.22	2.12
P15924	8	S	PSPYNMSSAPGSRSG	P15924	DSP	P37023	ALK1	String	TKL/STKR	3.22	2.12
P15924	8	S	PSPYNMSSAPGSRSG	P15924	DSP	Q04771	ALK2	String	TKL/STKR	3.22	2.12
P15924	8	S	PSPYNMSSAPGSRSG	P15924	DSP	B4DSV1	BMPR1B	String	TKL/STKR	3.22	2.12
P15924	8	S	PSPYNMSSAPGSRSG	P15924	DSP	D2JYI1	TGFbR2	String	TKL/STKR	3.22	2.12
P15924	8	S	PSPYNMSSAPGSRSG	P15924	DSP	Q13705	ACTR2B	String	TKL/STKR	3.22	2.12
P15924	8	S	PSPYNMSSAPGSRSG	P15924	DSP	Q13873	BMPR2	String	TKL/STKR	3.22	2.12
P15924	8	S	PSPYNMSSAPGSRSG	P15924	DSP	Q8NER5	ALK7	String	TKL/STKR	3.22	2.12
P15924	8	S	PSPYNMSSAPGSRSG	P15924	DSP	P27037	ACTR2	String	TKL/STKR	3.22	2.12
P15924	8	S	PSPYNMSSAPGSRSG	P15924	DSP	P41279	COT	String	STE/STE-Unique/COT	2.8	1.86
J3QRK0	8	S	AAYGTHLSPHVPHRV	P16144	ITGB4	P11802	CDK4	String	CMGC/CDK	1.61	1.11
J3QRK0	8	S	AAYGTHLSPHVPHRV	P16144	ITGB4	Q00537	PCTAIRE2	String	CMGC/CDK	1.61	1.11
J3QRK0	8	S	AAYGTHLSPHVPHRV	P16144	ITGB4	Q00536	PCTAIRE1	String	CMGC/CDK	1.61	1.11
J3QRK0	8	S	AAYGTHLSPHVPHRV	P16144	ITGB4	Q00535	CDK5	String	CMGC/CDK	1.61	1.11
J3QRK0	8	S	AAYGTHLSPHVPHRV	P16144	ITGB4	Q00534	CDK6	String	CMGC/CDK	1.61	1.11
J3QRK0	8	S	AAYGTHLSPHVPHRV	P16144	ITGB4	O94921	PFTAIRE1	String	CMGC/CDK	1.61	1.11
J3QRK0	8	S	AAYGTHLSPHVPHRV	P16144	ITGB4	P27361	Erk1	String	CMGC/MAPK	1.51	1.17
J3QRK0	8	S	AAYGTHLSPHVPHRV	P16144	ITGB4	Q13164	Erk5	String	CMGC/MAPK	1.51	1.17
J3QRK0	8	S	AAYGTHLSPHVPHRV	P16144	ITGB4	Q16659	Erk3	String	CMGC/MAPK	1.51	1.17
J3QRK0	8	S	AAYGTHLSPHVPHRV	P16144	ITGB4	A8MTD8	JNK3	String	CMGC/MAPK	1.51	1.17
J3QRK0	8	S	AAYGTHLSPHVPHRV	P16144	ITGB4	D3DX92	JNK1	String	CMGC/MAPK	1.51	1.17
J3QRK0	8	S	AAYGTHLSPHVPHRV	P16144	ITGB4	Q15759	p38b	String	CMGC/MAPK	1.51	1.17
J3QRK0	8	S	AAYGTHLSPHVPHRV	P16144	ITGB4	P45984	JNK2	String	CMGC/MAPK	1.51	1.17
J3QRK0	8	S	AAYGTHLSPHVPHRV	P16144	ITGB4	P28482	Erk2	String	CMGC/MAPK	1.51	1.17
J3QRK0	8	S	AAYGTHLSPHVPHRV	P16144	ITGB4	Q16539	p38a	String	CMGC/MAPK	1.51	1.17
J3QRK0	8	S	AAYGTHLSPHVPHRV	P16144	ITGB4	O15264	p38d	String	CMGC/MAPK	1.51	1.17
J3QRK0	8	S	AAYGTHLSPHVPHRV	P16144	ITGB4	P52564	MAP2K6	String	STE/STE7	2.45	1.16
J3QRK0	8	S	AAYGTHLSPHVPHRV	P16144	ITGB4	P45985	MAP2K4	String	STE/STE7	2.45	1.16
J3QRK0	8	S	AAYGTHLSPHVPHRV	P16144	ITGB4	Q02750	MAP2K1	String	STE/STE7	2.45	1.16
J3QRK0	8	S	AAYGTHLSPHVPHRV	P16144	ITGB4	O14733	MAP2K7	String	STE/STE7	2.45	1.16
J3QRK0	8	S	AAYGTHLSPHVPHRV	P16144	ITGB4	P36507	MAP2K2	String	STE/STE7	2.45	1.16
J3QRK0	8	S	AAYGTHLSPHVPHRV	P16144	ITGB4	Q13163	MAP2K5	String	STE/STE7	2.45	1.16
J3QRK0	8	S	AAYGTHLSPHVPHRV	P16144	ITGB4	P46734	MAP2K3	String	STE/STE7	2.45	1.16
B7Z8Q0	8	T	FPGTTTRTFCGTPDY	P05129	PKCg	Q96L34	MARK4	Exp.&String	CAMK/CAMKL	7.84	1.28
B7Z8Q0	8	T	FPGTTTRTFCGTPDY	P05129	PKCg	O60285	NuaK1	Exp.&String	CAMK/CAMKL	7.84	1.28
B7Z8Q0	8	T	FPGTTTRTFCGTPDY	P05129	PKCg	Q9Y2K2	QSK	Exp.&String	CAMK/CAMKL	7.84	1.28
B7Z8Q0	8	T	FPGTTTRTFCGTPDY	P05129	PKCg	Q8IY84	NIM1	Exp.&String	CAMK/CAMKL	7.84	1.28
B7Z8Q0	8	T	FPGTTTRTFCGTPDY	P05129	PKCg	P27448	MARK3	Exp.&String	CAMK/CAMKL	7.84	1.28
B7Z8Q0	8	T	FPGTTTRTFCGTPDY	P05129	PKCg	Q96RG2	PASK	Exp.&String	CAMK/CAMKL	7.84	1.28
B7Z8Q0	8	T	FPGTTTRTFCGTPDY	P05129	PKCg	B4E0Y5	NuaK2	Exp.&String	CAMK/CAMKL	7.84	1.28
B7Z8Q0	8	T	FPGTTTRTFCGTPDY	P05129	PKCg	Q9NRH2	SNRK	Exp.&String	CAMK/CAMKL	7.84	1.28
B7Z8Q0	8	T	FPGTTTRTFCGTPDY	P05129	PKCg	Q7KZI7	MARK2	Exp.&String	CAMK/CAMKL	7.84	1.28
B7Z8Q0	8	T	FPGTTTRTFCGTPDY	P05129	PKCg	Q8IWQ3	BRSK2	Exp.&String	CAMK/CAMKL	7.84	1.28
B7Z8Q0	8	T	FPGTTTRTFCGTPDY	P05129	PKCg	P04049	RAF1	String	TKL/RAF	7.2	2
B7Z8Q0	8	T	FPGTTTRTFCGTPDY	P05129	PKCg	Q8IVT5	KSR1	String	TKL/RAF	7.2	2
B7Z8Q0	8	T	FPGTTTRTFCGTPDY	P05129	PKCg	P10398	ARAF	String	TKL/RAF	7.2	2
B7Z8Q0	8	T	FPGTTTRTFCGTPDY	P05129	PKCg	Q6VAB6	KSR2	String	TKL/RAF	7.2	2
B7Z8Q0	8	T	FPGTTTRTFCGTPDY	P05129	PKCg	P15056	BRAF	String	TKL/RAF	7.2	2
B7Z8Q0	8	T	FPGTTTRTFCGTPDY	P05129	PKCg	Q9UQB9	AurC	String	Other/AUR	2.42	1.37
B1APF8	8	T	AKRVKGRTWTLCGTP	P22612	PKACg	P31749	AKT1	String	AGC/AKT	2.18	1.64
K7EIE9	8	S	LSPAFDHSPNKIMTE	P17706	PTPN2	Q00535	CDK5	Exp.&String	CMGC/CDK	2.06	1.11
K7EIE9	8	S	LSPAFDHSPNKIMTE	P17706	PTPN2	Q00534	CDK6	Exp.&String	CMGC/CDK	2.06	1.11
K7EIE9	8	S	LSPAFDHSPNKIMTE	P17706	PTPN2	O94921	PFTAIRE1	Exp.&String	CMGC/CDK	2.06	1.11
K7EIE9	8	S	LSPAFDHSPNKIMTE	P17706	PTPN2	P27361	Erk1	String	CMGC/MAPK	1.74	1.17
K7EIE9	8	S	LSPAFDHSPNKIMTE	P17706	PTPN2	Q13164	Erk5	String	CMGC/MAPK	1.74	1.17
K7EIE9	8	S	LSPAFDHSPNKIMTE	P17706	PTPN2	Q16659	Erk3	String	CMGC/MAPK	1.74	1.17
K7EIE9	8	S	LSPAFDHSPNKIMTE	P17706	PTPN2	A8MTD8	JNK3	String	CMGC/MAPK	1.74	1.17
K7EIE9	8	S	LSPAFDHSPNKIMTE	P17706	PTPN2	D3DX92	JNK1	String	CMGC/MAPK	1.74	1.17
K7EIE9	8	S	LSPAFDHSPNKIMTE	P17706	PTPN2	Q15759	p38b	String	CMGC/MAPK	1.74	1.17
K7EIE9	8	S	LSPAFDHSPNKIMTE	P17706	PTPN2	P45984	JNK2	String	CMGC/MAPK	1.74	1.17
K7EIE9	8	S	LSPAFDHSPNKIMTE	P17706	PTPN2	P28482	Erk2	String	CMGC/MAPK	1.74	1.17
K7EIE9	8	S	LSPAFDHSPNKIMTE	P17706	PTPN2	Q16539	p38a	String	CMGC/MAPK	1.74	1.17
K7EIE9	8	S	LSPAFDHSPNKIMTE	P17706	PTPN2	O15264	p38d	String	CMGC/MAPK	1.74	1.17
K7EIE9	8	S	LSPAFDHSPNKIMTE	P17706	PTPN2	P53350	PLK1	String	Other/PLK	1.35	1.21
K7EIE9	8	S	LSPAFDHSPNKIMTE	P17706	PTPN2	O00444	PLK4	String	Other/PLK	1.35	1.21
K7EIE9	8	S	LSPAFDHSPNKIMTE	P17706	PTPN2	Q9NYY3	PLK2	String	Other/PLK	1.35	1.21
K7EIE9	8	S	LSPAFDHSPNKIMTE	P17706	PTPN2	P06493	CDC2	Exp.&String	CMGC/CDK/CDC2	3.07	1.58
K7EIE9	8	S	LSPAFDHSPNKIMTE	P17706	PTPN2	P24941	CDK2	Exp.&String	CMGC/CDK/CDC2	3.07	1.58
E7EQR6	8	S	SKDDKHGSYEDAVHS	P17987	TCP1	O00506	YSK1	Exp.&String	STE/STE20	1.9	1.4
E7EQR6	8	S	SKDDKHGSYEDAVHS	P17987	TCP1	Q13177	PAK2	Exp.&String	STE/STE20	1.9	1.4
E7EQR6	8	S	SKDDKHGSYEDAVHS	P17987	TCP1	O94804	LOK	Exp.&String	STE/STE20	1.9	1.4
E7EQR6	8	S	SKDDKHGSYEDAVHS	P17987	TCP1	Q7RTN6	STLK5	Exp.&String	STE/STE20	1.9	1.4
E7EQR6	8	S	SKDDKHGSYEDAVHS	P17987	TCP1	C9J3X5	MYO3B	Exp.&String	STE/STE20	1.9	1.4
E7EQR6	8	S	SKDDKHGSYEDAVHS	P17987	TCP1	Q8IVH8	KHS2	Exp.&String	STE/STE20	1.9	1.4
E7EQR6	8	S	SKDDKHGSYEDAVHS	P17987	TCP1	Q9P286	PAK5	Exp.&String	STE/STE20	1.9	1.4
E7EQR6	8	S	SKDDKHGSYEDAVHS	P17987	TCP1	O95747	OSR1	Exp.&String	STE/STE20	1.9	1.4
E7EQR6	8	S	SKDDKHGSYEDAVHS	P17987	TCP1	Q9P289	MST4	Exp.&String	STE/STE20	1.9	1.4
E7EQR6	8	S	SKDDKHGSYEDAVHS	P17987	TCP1	Q7Z2Y5	NRK	Exp.&String	STE/STE20	1.9	1.4
E7EQR6	8	S	SKDDKHGSYEDAVHS	P17987	TCP1	Q9UHD2	TBK1	String	Other/IKK	2.16	1.14
E7EQR6	8	S	SKDDKHGSYEDAVHS	P17987	TCP1	O14920	IKKb	String	Other/IKK	2.16	1.14
E7EQR6	8	S	SKDDKHGSYEDAVHS	P17987	TCP1	Q14164	IKKe	String	Other/IKK	2.16	1.14
E7EQR6	8	S	SKDDKHGSYEDAVHS	P17987	TCP1	O15111	IKKa	String	Other/IKK	2.16	1.14
B4DUN1	8	S	GSLAVQNSPKGCHRD	B4DYX9	N/A	P50750	CDK9	String	CMGC/CDK	1.89	1.11
B4DUN1	8	S	GSLAVQNSPKGCHRD	B4DYX9	N/A	Q8IZL9	CCRK	String	CMGC/CDK	1.89	1.11
B4DUN1	8	S	GSLAVQNSPKGCHRD	B4DYX9	N/A	B4DK03	PCTAIRE3	String	CMGC/CDK	1.89	1.11
B4DUN1	8	S	GSLAVQNSPKGCHRD	B4DYX9	N/A	P50613	CDK7	String	CMGC/CDK	1.89	1.11
B4DUN1	8	S	GSLAVQNSPKGCHRD	B4DYX9	N/A	Q14004	CHED	String	CMGC/CDK	1.89	1.11
B4DUN1	8	S	GSLAVQNSPKGCHRD	B4DYX9	N/A	Q96Q40	PFTAIRE2	String	CMGC/CDK	1.89	1.11
B4DUN1	8	S	GSLAVQNSPKGCHRD	B4DYX9	N/A	Q9NYV4	CRK7	String	CMGC/CDK	1.89	1.11
B4DUN1	8	S	GSLAVQNSPKGCHRD	B4DYX9	N/A	P11802	CDK4	String	CMGC/CDK	1.89	1.11
B4DUN1	8	S	GSLAVQNSPKGCHRD	B4DYX9	N/A	Q00537	PCTAIRE2	String	CMGC/CDK	1.89	1.11
B4DUN1	8	S	GSLAVQNSPKGCHRD	B4DYX9	N/A	Q00536	PCTAIRE1	String	CMGC/CDK	1.89	1.11
B4DUN1	8	S	GSLAVQNSPKGCHRD	B4DYX9	N/A	Q00535	CDK5	String	CMGC/CDK	1.89	1.11
B4DUN1	8	S	GSLAVQNSPKGCHRD	B4DYX9	N/A	Q00534	CDK6	String	CMGC/CDK	1.89	1.11
B4DUN1	8	S	GSLAVQNSPKGCHRD	B4DYX9	N/A	O94921	PFTAIRE1	String	CMGC/CDK	1.89	1.11
E9PBF6	8	T	SRAGGPTTPLSPTRL	P20700	LMNB1	B4DH08	CDKL2	String	CMGC	4.14	1.46
E9PBF6	8	T	SRAGGPTTPLSPTRL	P20700	LMNB1	O76039	CDKL5	String	CMGC	4.14	1.46
E9PBF6	8	T	SRAGGPTTPLSPTRL	P20700	LMNB1	C9JQJ0	SRPK2	String	CMGC	4.14	1.46
E9PBF6	8	T	SRAGGPTTPLSPTRL	P20700	LMNB1	P20794	MAK	String	CMGC	4.14	1.46
E9PBF6	8	T	SRAGGPTTPLSPTRL	P20700	LMNB1	Q9HAZ1	CLK4	String	CMGC	4.14	1.46
E9PBF6	8	T	SRAGGPTTPLSPTRL	P20700	LMNB1	Q59FC5	CLK3	String	CMGC	4.14	1.46
E9PBF6	8	T	SRAGGPTTPLSPTRL	P20700	LMNB1	P49760	CLK2	String	CMGC	4.14	1.46
E9PBF6	8	T	SRAGGPTTPLSPTRL	P20700	LMNB1	B4DFW7	CLK1	String	CMGC	4.14	1.46
E9PBF6	8	T	SRAGGPTTPLSPTRL	P20700	LMNB1	Q2NME9	CDKL4	String	CMGC	4.14	1.46
E9PBF6	8	T	SRAGGPTTPLSPTRL	P20700	LMNB1	Q9UPE1	MSSK1	String	CMGC	4.14	1.46
E9PBF6	8	T	SRAGGPTTPLSPTRL	P20700	LMNB1	Q00532	CDKL1	String	CMGC	4.14	1.46
E9PBF6	8	T	SRAGGPTTPLSPTRL	P20700	LMNB1	Q9UPZ9	ICK	String	CMGC	4.14	1.46
E9PBF6	8	T	SRAGGPTTPLSPTRL	P20700	LMNB1	P50613	CDK7	String	CMGC/CDK	2.79	1.11
E9PBF6	8	T	SRAGGPTTPLSPTRL	P20700	LMNB1	Q14004	CHED	String	CMGC/CDK	2.79	1.11
E9PBF6	8	T	SRAGGPTTPLSPTRL	P20700	LMNB1	Q96Q40	PFTAIRE2	String	CMGC/CDK	2.79	1.11
E9PBF6	8	T	SRAGGPTTPLSPTRL	P20700	LMNB1	Q9NYV4	CRK7	String	CMGC/CDK	2.79	1.11
E9PBF6	8	T	SRAGGPTTPLSPTRL	P20700	LMNB1	P11802	CDK4	String	CMGC/CDK	2.79	1.11
E9PBF6	8	T	SRAGGPTTPLSPTRL	P20700	LMNB1	Q00537	PCTAIRE2	String	CMGC/CDK	2.79	1.11
E9PBF6	8	T	SRAGGPTTPLSPTRL	P20700	LMNB1	Q00536	PCTAIRE1	String	CMGC/CDK	2.79	1.11
E9PBF6	8	T	SRAGGPTTPLSPTRL	P20700	LMNB1	Q00535	CDK5	String	CMGC/CDK	2.79	1.11
E9PBF6	8	T	SRAGGPTTPLSPTRL	P20700	LMNB1	Q00534	CDK6	String	CMGC/CDK	2.79	1.11
E9PBF6	8	T	SRAGGPTTPLSPTRL	P20700	LMNB1	O94921	PFTAIRE1	String	CMGC/CDK	2.79	1.11
E9PBF6	8	T	SRAGGPTTPLSPTRL	P20700	LMNB1	P06493	CDC2	Exp.&String	CMGC/CDK/CDC2	3.97	1.58
E9PBF6	8	T	SRAGGPTTPLSPTRL	P20700	LMNB1	P24941	CDK2	String	CMGC/CDK/CDC2	3.97	1.58
E9PBF6	8	S	GGPTTPLSPTRLSRL	P20700	LMNB1	B4DH08	CDKL2	String	CMGC	4.51	1.46
E9PBF6	8	S	GGPTTPLSPTRLSRL	P20700	LMNB1	O76039	CDKL5	String	CMGC	4.51	1.46
E9PBF6	8	S	GGPTTPLSPTRLSRL	P20700	LMNB1	C9JQJ0	SRPK2	String	CMGC	4.51	1.46
E9PBF6	8	S	GGPTTPLSPTRLSRL	P20700	LMNB1	P20794	MAK	String	CMGC	4.51	1.46
E9PBF6	8	S	GGPTTPLSPTRLSRL	P20700	LMNB1	Q9HAZ1	CLK4	String	CMGC	4.51	1.46
E9PBF6	8	S	GGPTTPLSPTRLSRL	P20700	LMNB1	Q59FC5	CLK3	String	CMGC	4.51	1.46
E9PBF6	8	S	GGPTTPLSPTRLSRL	P20700	LMNB1	P49760	CLK2	String	CMGC	4.51	1.46
E9PBF6	8	S	GGPTTPLSPTRLSRL	P20700	LMNB1	B4DFW7	CLK1	String	CMGC	4.51	1.46
E9PBF6	8	S	GGPTTPLSPTRLSRL	P20700	LMNB1	Q2NME9	CDKL4	String	CMGC	4.51	1.46
E9PBF6	8	S	GGPTTPLSPTRLSRL	P20700	LMNB1	Q9UPE1	MSSK1	String	CMGC	4.51	1.46
E9PBF6	8	S	GGPTTPLSPTRLSRL	P20700	LMNB1	Q00532	CDKL1	String	CMGC	4.51	1.46
E9PBF6	8	S	GGPTTPLSPTRLSRL	P20700	LMNB1	Q9UPZ9	ICK	String	CMGC	4.51	1.46
E9PBF6	8	S	GGPTTPLSPTRLSRL	P20700	LMNB1	P50613	CDK7	String	CMGC/CDK	3.32	1.11
E9PBF6	8	S	GGPTTPLSPTRLSRL	P20700	LMNB1	Q14004	CHED	String	CMGC/CDK	3.32	1.11
E9PBF6	8	S	GGPTTPLSPTRLSRL	P20700	LMNB1	Q96Q40	PFTAIRE2	String	CMGC/CDK	3.32	1.11
E9PBF6	8	S	GGPTTPLSPTRLSRL	P20700	LMNB1	Q9NYV4	CRK7	String	CMGC/CDK	3.32	1.11
E9PBF6	8	S	GGPTTPLSPTRLSRL	P20700	LMNB1	P11802	CDK4	String	CMGC/CDK	3.32	1.11
E9PBF6	8	S	GGPTTPLSPTRLSRL	P20700	LMNB1	Q00537	PCTAIRE2	String	CMGC/CDK	3.32	1.11
E9PBF6	8	S	GGPTTPLSPTRLSRL	P20700	LMNB1	Q00536	PCTAIRE1	String	CMGC/CDK	3.32	1.11
E9PBF6	8	S	GGPTTPLSPTRLSRL	P20700	LMNB1	Q00535	CDK5	String	CMGC/CDK	3.32	1.11
E9PBF6	8	S	GGPTTPLSPTRLSRL	P20700	LMNB1	Q00534	CDK6	String	CMGC/CDK	3.32	1.11
E9PBF6	8	S	GGPTTPLSPTRLSRL	P20700	LMNB1	O94921	PFTAIRE1	String	CMGC/CDK	3.32	1.11
E9PBF6	8	S	GGPTTPLSPTRLSRL	P20700	LMNB1	P51617	IRAK1	String	TKL/IRAK	5	3.26
E9PBF6	8	S	GGPTTPLSPTRLSRL	P20700	LMNB1	O43187	IRAK2	String	TKL/IRAK	5	3.26
E9PBF6	8	S	GGPTTPLSPTRLSRL	P20700	LMNB1	P06493	CDC2	Exp.&String	CMGC/CDK/CDC2	3.86	1.58
E9PBF6	8	S	GGPTTPLSPTRLSRL	P20700	LMNB1	P24941	CDK2	String	CMGC/CDK/CDC2	3.86	1.58
F5H0K0	8	S	ECIQRGVSPSQAQGL	P20823	HNF1A	Q00534	CDK6	String	CMGC/CDK	2.08	1.11
F5H0K0	8	S	ECIQRGVSPSQAQGL	P20823	HNF1A	O94921	PFTAIRE1	String	CMGC/CDK	2.08	1.11
F5H0K0	8	S	ECIQRGVSPSQAQGL	P20823	HNF1A	Q9UBE8	NLK	String	CMGC/MAPK	1.84	1.17
F5H0K0	8	S	ECIQRGVSPSQAQGL	P20823	HNF1A	P31152	Erk4	String	CMGC/MAPK	1.84	1.17
F5H0K0	8	S	ECIQRGVSPSQAQGL	P20823	HNF1A	Q8TD08	Erk7	String	CMGC/MAPK	1.84	1.17
F5H0K0	8	S	ECIQRGVSPSQAQGL	P20823	HNF1A	P53778	p38g	String	CMGC/MAPK	1.84	1.17
F5H0K0	8	S	ECIQRGVSPSQAQGL	P20823	HNF1A	P27361	Erk1	String	CMGC/MAPK	1.84	1.17
F5H0K0	8	S	ECIQRGVSPSQAQGL	P20823	HNF1A	Q13164	Erk5	String	CMGC/MAPK	1.84	1.17
F5H0K0	8	S	ECIQRGVSPSQAQGL	P20823	HNF1A	Q16659	Erk3	String	CMGC/MAPK	1.84	1.17
F5H0K0	8	S	ECIQRGVSPSQAQGL	P20823	HNF1A	A8MTD8	JNK3	String	CMGC/MAPK	1.84	1.17
F5H0K0	8	S	ECIQRGVSPSQAQGL	P20823	HNF1A	D3DX92	JNK1	String	CMGC/MAPK	1.84	1.17
F5H0K0	8	S	ECIQRGVSPSQAQGL	P20823	HNF1A	Q15759	p38b	String	CMGC/MAPK	1.84	1.17
F5H0K0	8	S	ECIQRGVSPSQAQGL	P20823	HNF1A	P45984	JNK2	String	CMGC/MAPK	1.84	1.17
F5H0K0	8	S	ECIQRGVSPSQAQGL	P20823	HNF1A	P28482	Erk2	String	CMGC/MAPK	1.84	1.17
F5H0K0	8	S	ECIQRGVSPSQAQGL	P20823	HNF1A	Q16539	p38a	String	CMGC/MAPK	1.84	1.17
F5H0K0	8	S	ECIQRGVSPSQAQGL	P20823	HNF1A	O15264	p38d	String	CMGC/MAPK	1.84	1.17
P22314	8	S	NGMAKNGSEADIDEG	P22314	UBA1	Q96RU8	Trb1	String	CAMK	1.18	1.17
P22314	8	S	NGMAKNGSEADIDEG	P22314	UBA1	Q96RU7	Trb3	String	CAMK	1.18	1.17
P22314	8	S	NGMAKNGSEADIDEG	P22314	UBA1	Q9C098	DCLK3	String	CAMK	1.18	1.17
P22314	8	S	NGMAKNGSEADIDEG	P22314	UBA1	Q8N568	DCLK2	String	CAMK	1.18	1.17
P22314	8	S	NGMAKNGSEADIDEG	P22314	UBA1	A6NGQ3	Obscn	String	CAMK	1.18	1.17
P22314	8	S	NGMAKNGSEADIDEG	P22314	UBA1	Q15772	SPEG	String	CAMK	1.18	1.17
P22314	8	S	NGMAKNGSEADIDEG	P22314	UBA1	Q6SA08	TSSK4	String	CAMK	1.18	1.17
P22314	8	S	NGMAKNGSEADIDEG	P22314	UBA1	O15075	DCLK1	String	CAMK	1.18	1.17
P22314	8	S	NGMAKNGSEADIDEG	P22314	UBA1	Q96QS6	PSKH2	String	CAMK	1.18	1.17
P22314	8	S	NGMAKNGSEADIDEG	P22314	UBA1	Q92519	Trb2	String	CAMK	1.18	1.17
P22314	8	S	NGMAKNGSEADIDEG	P22314	UBA1	Q86V86	PIM3	String	CAMK	1.18	1.17
P22314	8	S	NGMAKNGSEADIDEG	P22314	UBA1	O60229	Trad	String	CAMK	1.18	1.17
P22314	8	S	NGMAKNGSEADIDEG	P22314	UBA1	P11801	PSKH1	String	CAMK	1.18	1.17
P22314	8	S	NGMAKNGSEADIDEG	P22314	UBA1	Q96PN8	TSSK3	String	CAMK	1.18	1.17
P22314	8	S	NGMAKNGSEADIDEG	P22314	UBA1	Q96PF2	TSSK2	String	CAMK	1.18	1.17
P22314	8	S	NGMAKNGSEADIDEG	P22314	UBA1	B2RDF9	VACAMKL	String	CAMK	1.18	1.17
P22314	8	S	NGMAKNGSEADIDEG	P22314	UBA1	Q9P1W9	PIM2	String	CAMK	1.18	1.17
P22314	8	S	NGMAKNGSEADIDEG	P22314	UBA1	P11309	PIM1	String	CAMK	1.18	1.17
B4DS13	8	S	NKEEDCHSPTSKPPK	P23588	EIF4B	P27361	Erk1	String	CMGC/MAPK	2.54	1.17
B4DS13	8	S	NKEEDCHSPTSKPPK	P23588	EIF4B	Q13164	Erk5	String	CMGC/MAPK	2.54	1.17
B4DS13	8	S	NKEEDCHSPTSKPPK	P23588	EIF4B	Q16659	Erk3	String	CMGC/MAPK	2.54	1.17
B4DS13	8	S	NKEEDCHSPTSKPPK	P23588	EIF4B	A8MTD8	JNK3	String	CMGC/MAPK	2.54	1.17
B4DS13	8	S	NKEEDCHSPTSKPPK	P23588	EIF4B	D3DX92	JNK1	String	CMGC/MAPK	2.54	1.17
B4DS13	8	S	NKEEDCHSPTSKPPK	P23588	EIF4B	Q15759	p38b	String	CMGC/MAPK	2.54	1.17
B4DS13	8	S	NKEEDCHSPTSKPPK	P23588	EIF4B	P45984	JNK2	String	CMGC/MAPK	2.54	1.17
B4DS13	8	S	NKEEDCHSPTSKPPK	P23588	EIF4B	P28482	Erk2	String	CMGC/MAPK	2.54	1.17
B4DS13	8	S	NKEEDCHSPTSKPPK	P23588	EIF4B	Q16539	p38a	String	CMGC/MAPK	2.54	1.17
B4DS13	8	S	NKEEDCHSPTSKPPK	P23588	EIF4B	O15264	p38d	String	CMGC/MAPK	2.54	1.17
B4DS13	8	S	NKEEDCHSPTSKPPK	P23588	EIF4B	O15111	IKKa	String	Other/IKK	1.2	1.14
B4DS13	8	S	NKEEDCHSPTSKPPK	P23588	EIF4B	P42345	FRAP	String	Atypical/PIKK/FRAP	6.87	2.79
B4DS13	8	S	EDCHSPTSKPPKPDQ	P23588	EIF4B	P27361	Erk1	String	CMGC/MAPK	1.17	1.17
B4DS13	8	S	EDCHSPTSKPPKPDQ	P23588	EIF4B	Q13164	Erk5	String	CMGC/MAPK	1.17	1.17
B4DS13	8	S	EDCHSPTSKPPKPDQ	P23588	EIF4B	Q16659	Erk3	String	CMGC/MAPK	1.17	1.17
B4DS13	8	S	EDCHSPTSKPPKPDQ	P23588	EIF4B	A8MTD8	JNK3	String	CMGC/MAPK	1.17	1.17
B4DS13	8	S	EDCHSPTSKPPKPDQ	P23588	EIF4B	D3DX92	JNK1	String	CMGC/MAPK	1.17	1.17
B4DS13	8	S	EDCHSPTSKPPKPDQ	P23588	EIF4B	Q15759	p38b	String	CMGC/MAPK	1.17	1.17
B4DS13	8	S	EDCHSPTSKPPKPDQ	P23588	EIF4B	P45984	JNK2	String	CMGC/MAPK	1.17	1.17
B4DS13	8	S	EDCHSPTSKPPKPDQ	P23588	EIF4B	P28482	Erk2	String	CMGC/MAPK	1.17	1.17
B4DS13	8	S	EDCHSPTSKPPKPDQ	P23588	EIF4B	Q16539	p38a	String	CMGC/MAPK	1.17	1.17
B4DS13	8	S	EDCHSPTSKPPKPDQ	P23588	EIF4B	O15264	p38d	String	CMGC/MAPK	1.17	1.17
B4DX52	8	Y	RVSLEEIYSGCTKKM	Q6FI51	DNAJB1	P42680	TEC	String	TK/Tec	4.97	3.13
B4DX52	8	Y	RVSLEEIYSGCTKKM	Q6FI51	DNAJB1	Q08881	ITK	String	TK/Tec	4.97	3.13
B4DX52	8	Y	RVSLEEIYSGCTKKM	Q6FI51	DNAJB1	P42681	TXK	String	TK/Tec	4.97	3.13
B4DX52	8	Y	RVSLEEIYSGCTKKM	Q6FI51	DNAJB1	P51813	BMX	String	TK/Tec	4.97	3.13
B4DX52	8	Y	RVSLEEIYSGCTKKM	Q6FI51	DNAJB1	Q06187	BTK	String	TK/Tec	4.97	3.13
F5GX68	8	S	DNIPEMPSPKKMHQG	P26358	DNMT1	O76039	CDKL5	String	CMGC	2.85	1.46
F5GX68	8	S	DNIPEMPSPKKMHQG	P26358	DNMT1	C9JQJ0	SRPK2	String	CMGC	2.85	1.46
F5GX68	8	S	DNIPEMPSPKKMHQG	P26358	DNMT1	P20794	MAK	String	CMGC	2.85	1.46
F5GX68	8	S	DNIPEMPSPKKMHQG	P26358	DNMT1	Q9HAZ1	CLK4	String	CMGC	2.85	1.46
F5GX68	8	S	DNIPEMPSPKKMHQG	P26358	DNMT1	Q59FC5	CLK3	String	CMGC	2.85	1.46
F5GX68	8	S	DNIPEMPSPKKMHQG	P26358	DNMT1	P49760	CLK2	String	CMGC	2.85	1.46
F5GX68	8	S	DNIPEMPSPKKMHQG	P26358	DNMT1	B4DFW7	CLK1	String	CMGC	2.85	1.46
F5GX68	8	S	DNIPEMPSPKKMHQG	P26358	DNMT1	Q2NME9	CDKL4	String	CMGC	2.85	1.46
F5GX68	8	S	DNIPEMPSPKKMHQG	P26358	DNMT1	Q9UPE1	MSSK1	String	CMGC	2.85	1.46
F5GX68	8	S	DNIPEMPSPKKMHQG	P26358	DNMT1	Q00532	CDKL1	String	CMGC	2.85	1.46
F5GX68	8	S	DNIPEMPSPKKMHQG	P26358	DNMT1	Q9UPZ9	ICK	String	CMGC	2.85	1.46
F5GX68	8	S	DNIPEMPSPKKMHQG	P26358	DNMT1	Q92630	DYRK2	String	CMGC/DYRK	3.08	1.5
F5GX68	8	S	DNIPEMPSPKKMHQG	P26358	DNMT1	Q9NR20	DYRK4	String	CMGC/DYRK	3.08	1.5
F5GX68	8	S	DNIPEMPSPKKMHQG	P26358	DNMT1	Q9H2X6	HIPK2	String	CMGC/DYRK	3.08	1.5
F5GX68	8	S	DNIPEMPSPKKMHQG	P26358	DNMT1	Q86Z02	HIPK1	String	CMGC/DYRK	3.08	1.5
F5GX68	8	S	DNIPEMPSPKKMHQG	P26358	DNMT1	Q8NE63	HIPK4	String	CMGC/DYRK	3.08	1.5
F5GX68	8	S	DNIPEMPSPKKMHQG	P26358	DNMT1	O43781	DYRK3	String	CMGC/DYRK	3.08	1.5
F5GX68	8	S	DNIPEMPSPKKMHQG	P26358	DNMT1	Q13627	DYRK1A	String	CMGC/DYRK	3.08	1.5
F5GX68	8	S	DNIPEMPSPKKMHQG	P26358	DNMT1	Q9Y463	DYRK1B	String	CMGC/DYRK	3.08	1.5
F5GX68	8	S	DNIPEMPSPKKMHQG	P26358	DNMT1	Q9H422	HIPK3	String	CMGC/DYRK	3.08	1.5
F5GX68	8	S	DNIPEMPSPKKMHQG	P26358	DNMT1	P27361	Erk1	String	CMGC/MAPK	2.06	1.17
F5GX68	8	S	DNIPEMPSPKKMHQG	P26358	DNMT1	Q13164	Erk5	String	CMGC/MAPK	2.06	1.17
F5GX68	8	S	DNIPEMPSPKKMHQG	P26358	DNMT1	Q16659	Erk3	String	CMGC/MAPK	2.06	1.17
F5GX68	8	S	DNIPEMPSPKKMHQG	P26358	DNMT1	A8MTD8	JNK3	String	CMGC/MAPK	2.06	1.17
F5GX68	8	S	DNIPEMPSPKKMHQG	P26358	DNMT1	D3DX92	JNK1	String	CMGC/MAPK	2.06	1.17
F5GX68	8	S	DNIPEMPSPKKMHQG	P26358	DNMT1	Q15759	p38b	String	CMGC/MAPK	2.06	1.17
F5GX68	8	S	DNIPEMPSPKKMHQG	P26358	DNMT1	P45984	JNK2	String	CMGC/MAPK	2.06	1.17
F5GX68	8	S	DNIPEMPSPKKMHQG	P26358	DNMT1	P28482	Erk2	String	CMGC/MAPK	2.06	1.17
F5GX68	8	S	DNIPEMPSPKKMHQG	P26358	DNMT1	Q16539	p38a	String	CMGC/MAPK	2.06	1.17
F5GX68	8	S	DNIPEMPSPKKMHQG	P26358	DNMT1	O15264	p38d	String	CMGC/MAPK	2.06	1.17
F5GX68	8	S	DNIPEMPSPKKMHQG	P26358	DNMT1	O14757	CHK1	String	CAMK/CAMKL/CHK1	2.14	1.72
A6NLN1	8	S	LTKDYGNSPLHRFKK	Q9BUQ0	PTBP1	Q00535	CDK5	String	CMGC/CDK	2.18	1.11
A6NLN1	8	S	LTKDYGNSPLHRFKK	Q9BUQ0	PTBP1	Q00534	CDK6	String	CMGC/CDK	2.18	1.11
A6NLN1	8	S	LTKDYGNSPLHRFKK	Q9BUQ0	PTBP1	O94921	PFTAIRE1	String	CMGC/CDK	2.18	1.11
A6NLN1	8	S	LTKDYGNSPLHRFKK	Q9BUQ0	PTBP1	P27361	Erk1	String	CMGC/MAPK	1.24	1.17
A6NLN1	8	S	LTKDYGNSPLHRFKK	Q9BUQ0	PTBP1	Q13164	Erk5	String	CMGC/MAPK	1.24	1.17
A6NLN1	8	S	LTKDYGNSPLHRFKK	Q9BUQ0	PTBP1	Q16659	Erk3	String	CMGC/MAPK	1.24	1.17
A6NLN1	8	S	LTKDYGNSPLHRFKK	Q9BUQ0	PTBP1	A8MTD8	JNK3	String	CMGC/MAPK	1.24	1.17
A6NLN1	8	S	LTKDYGNSPLHRFKK	Q9BUQ0	PTBP1	D3DX92	JNK1	String	CMGC/MAPK	1.24	1.17
A6NLN1	8	S	LTKDYGNSPLHRFKK	Q9BUQ0	PTBP1	Q15759	p38b	String	CMGC/MAPK	1.24	1.17
A6NLN1	8	S	LTKDYGNSPLHRFKK	Q9BUQ0	PTBP1	P45984	JNK2	String	CMGC/MAPK	1.24	1.17
A6NLN1	8	S	LTKDYGNSPLHRFKK	Q9BUQ0	PTBP1	P28482	Erk2	String	CMGC/MAPK	1.24	1.17
A6NLN1	8	S	LTKDYGNSPLHRFKK	Q9BUQ0	PTBP1	Q16539	p38a	String	CMGC/MAPK	1.24	1.17
A6NLN1	8	S	LTKDYGNSPLHRFKK	Q9BUQ0	PTBP1	O15264	p38d	String	CMGC/MAPK	1.24	1.17
P26368	8	S	EHGGLIRSPRHEKKK	P26368	U2AF2	Q96SB4	SRPK1	Exp.&String	CMGC	2.32	1.46
P26368	8	S	EHGGLIRSPRHEKKK	P26368	U2AF2	Q8IVW4	CDKL3	Exp.&String	CMGC	2.32	1.46
P26368	8	S	EHGGLIRSPRHEKKK	P26368	U2AF2	B4DH08	CDKL2	Exp.&String	CMGC	2.32	1.46
P26368	8	S	EHGGLIRSPRHEKKK	P26368	U2AF2	O76039	CDKL5	Exp.&String	CMGC	2.32	1.46
P26368	8	S	EHGGLIRSPRHEKKK	P26368	U2AF2	C9JQJ0	SRPK2	Exp.&String	CMGC	2.32	1.46
P26368	8	S	EHGGLIRSPRHEKKK	P26368	U2AF2	P20794	MAK	Exp.&String	CMGC	2.32	1.46
P26368	8	S	EHGGLIRSPRHEKKK	P26368	U2AF2	Q9HAZ1	CLK4	Exp.&String	CMGC	2.32	1.46
P26368	8	S	EHGGLIRSPRHEKKK	P26368	U2AF2	Q59FC5	CLK3	Exp.&String	CMGC	2.32	1.46
P26368	8	S	EHGGLIRSPRHEKKK	P26368	U2AF2	P49760	CLK2	Exp.&String	CMGC	2.32	1.46
P26368	8	S	EHGGLIRSPRHEKKK	P26368	U2AF2	B4DFW7	CLK1	Exp.&String	CMGC	2.32	1.46
P26368	8	S	EHGGLIRSPRHEKKK	P26368	U2AF2	Q2NME9	CDKL4	Exp.&String	CMGC	2.32	1.46
P26368	8	S	EHGGLIRSPRHEKKK	P26368	U2AF2	Q9UPE1	MSSK1	Exp.&String	CMGC	2.32	1.46
P26368	8	S	EHGGLIRSPRHEKKK	P26368	U2AF2	Q00532	CDKL1	Exp.&String	CMGC	2.32	1.46
P26368	8	S	EHGGLIRSPRHEKKK	P26368	U2AF2	Q9UPZ9	ICK	Exp.&String	CMGC	2.32	1.46
P26368	8	S	EHGGLIRSPRHEKKK	P26368	U2AF2	P50750	CDK9	String	CMGC/CDK	3.05	1.11
P26368	8	S	EHGGLIRSPRHEKKK	P26368	U2AF2	Q8IZL9	CCRK	String	CMGC/CDK	3.05	1.11
P26368	8	S	EHGGLIRSPRHEKKK	P26368	U2AF2	B4DK03	PCTAIRE3	String	CMGC/CDK	3.05	1.11
P26368	8	S	EHGGLIRSPRHEKKK	P26368	U2AF2	P50613	CDK7	String	CMGC/CDK	3.05	1.11
P26368	8	S	EHGGLIRSPRHEKKK	P26368	U2AF2	Q14004	CHED	String	CMGC/CDK	3.05	1.11
P26368	8	S	EHGGLIRSPRHEKKK	P26368	U2AF2	Q96Q40	PFTAIRE2	String	CMGC/CDK	3.05	1.11
P26368	8	S	EHGGLIRSPRHEKKK	P26368	U2AF2	Q9NYV4	CRK7	String	CMGC/CDK	3.05	1.11
P26368	8	S	EHGGLIRSPRHEKKK	P26368	U2AF2	P11802	CDK4	String	CMGC/CDK	3.05	1.11
P26368	8	S	EHGGLIRSPRHEKKK	P26368	U2AF2	Q00537	PCTAIRE2	String	CMGC/CDK	3.05	1.11
P26368	8	S	EHGGLIRSPRHEKKK	P26368	U2AF2	Q00536	PCTAIRE1	String	CMGC/CDK	3.05	1.11
P26368	8	S	EHGGLIRSPRHEKKK	P26368	U2AF2	Q00535	CDK5	String	CMGC/CDK	3.05	1.11
P26368	8	S	EHGGLIRSPRHEKKK	P26368	U2AF2	Q00534	CDK6	String	CMGC/CDK	3.05	1.11
P26368	8	S	EHGGLIRSPRHEKKK	P26368	U2AF2	O94921	PFTAIRE1	String	CMGC/CDK	3.05	1.11
P28066	8	S	DRGVNTFSPEGRLFQ	P28066	PSMA5	P27361	Erk1	String	CMGC/MAPK	1.24	1.17
P28066	8	S	DRGVNTFSPEGRLFQ	P28066	PSMA5	Q13164	Erk5	String	CMGC/MAPK	1.24	1.17
P28066	8	S	DRGVNTFSPEGRLFQ	P28066	PSMA5	Q16659	Erk3	String	CMGC/MAPK	1.24	1.17
P28066	8	S	DRGVNTFSPEGRLFQ	P28066	PSMA5	A8MTD8	JNK3	String	CMGC/MAPK	1.24	1.17
P28066	8	S	DRGVNTFSPEGRLFQ	P28066	PSMA5	D3DX92	JNK1	String	CMGC/MAPK	1.24	1.17
P28066	8	S	DRGVNTFSPEGRLFQ	P28066	PSMA5	Q15759	p38b	String	CMGC/MAPK	1.24	1.17
P28066	8	S	DRGVNTFSPEGRLFQ	P28066	PSMA5	P45984	JNK2	String	CMGC/MAPK	1.24	1.17
P28066	8	S	DRGVNTFSPEGRLFQ	P28066	PSMA5	P28482	Erk2	String	CMGC/MAPK	1.24	1.17
P28066	8	S	DRGVNTFSPEGRLFQ	P28066	PSMA5	Q16539	p38a	String	CMGC/MAPK	1.24	1.17
P28066	8	S	DRGVNTFSPEGRLFQ	P28066	PSMA5	O15264	p38d	String	CMGC/MAPK	1.24	1.17
P28066	8	S	DRGVNTFSPEGRLFQ	P28066	PSMA5	P06493	CDC2	String	CMGC/CDK/CDC2	1.71	1.58
P28066	8	S	DRGVNTFSPEGRLFQ	P28066	PSMA5	P24941	CDK2	String	CMGC/CDK/CDC2	1.71	1.58
P28482	8	Y	HTGFLTEYVATRWYR	P28482	Erk2	Q9UM73	ALK	Exp.	TK/Alk	1.83	1.73
P28482	8	Y	HTGFLTEYVATRWYR	P28482	Erk2	P29376	LTK	Exp.	TK/Alk	1.83	1.73
P28749	8	S	RRDMQPLSPISVHER	P28749	RBL1	B4DH08	CDKL2	String	CMGC	3.12	1.46
P28749	8	S	RRDMQPLSPISVHER	P28749	RBL1	O76039	CDKL5	String	CMGC	3.12	1.46
P28749	8	S	RRDMQPLSPISVHER	P28749	RBL1	C9JQJ0	SRPK2	String	CMGC	3.12	1.46
P28749	8	S	RRDMQPLSPISVHER	P28749	RBL1	P20794	MAK	String	CMGC	3.12	1.46
P28749	8	S	RRDMQPLSPISVHER	P28749	RBL1	Q9HAZ1	CLK4	String	CMGC	3.12	1.46
P28749	8	S	RRDMQPLSPISVHER	P28749	RBL1	Q59FC5	CLK3	String	CMGC	3.12	1.46
P28749	8	S	RRDMQPLSPISVHER	P28749	RBL1	P49760	CLK2	String	CMGC	3.12	1.46
P28749	8	S	RRDMQPLSPISVHER	P28749	RBL1	B4DFW7	CLK1	String	CMGC	3.12	1.46
P28749	8	S	RRDMQPLSPISVHER	P28749	RBL1	Q2NME9	CDKL4	String	CMGC	3.12	1.46
P28749	8	S	RRDMQPLSPISVHER	P28749	RBL1	Q9UPE1	MSSK1	String	CMGC	3.12	1.46
P28749	8	S	RRDMQPLSPISVHER	P28749	RBL1	Q00532	CDKL1	String	CMGC	3.12	1.46
P28749	8	S	RRDMQPLSPISVHER	P28749	RBL1	Q9UPZ9	ICK	String	CMGC	3.12	1.46
P28749	8	S	RRDMQPLSPISVHER	P28749	RBL1	Q9BWU1	CDK11	String	CMGC/CDK	2.43	1.11
P28749	8	S	RRDMQPLSPISVHER	P28749	RBL1	P21127	PITSLRE	String	CMGC/CDK	2.43	1.11
P28749	8	S	RRDMQPLSPISVHER	P28749	RBL1	Q15131	CDK10	String	CMGC/CDK	2.43	1.11
P28749	8	S	RRDMQPLSPISVHER	P28749	RBL1	P49336	CDK8	String	CMGC/CDK	2.43	1.11
P28749	8	S	RRDMQPLSPISVHER	P28749	RBL1	P50750	CDK9	String	CMGC/CDK	2.43	1.11
P28749	8	S	RRDMQPLSPISVHER	P28749	RBL1	Q8IZL9	CCRK	String	CMGC/CDK	2.43	1.11
P28749	8	S	RRDMQPLSPISVHER	P28749	RBL1	B4DK03	PCTAIRE3	String	CMGC/CDK	2.43	1.11
P28749	8	S	RRDMQPLSPISVHER	P28749	RBL1	P50613	CDK7	String	CMGC/CDK	2.43	1.11
P28749	8	S	RRDMQPLSPISVHER	P28749	RBL1	Q14004	CHED	String	CMGC/CDK	2.43	1.11
P28749	8	S	RRDMQPLSPISVHER	P28749	RBL1	Q96Q40	PFTAIRE2	String	CMGC/CDK	2.43	1.11
P28749	8	S	RRDMQPLSPISVHER	P28749	RBL1	Q9NYV4	CRK7	String	CMGC/CDK	2.43	1.11
P28749	8	S	RRDMQPLSPISVHER	P28749	RBL1	P11802	CDK4	Exp.&String	CMGC/CDK	2.43	1.11
P28749	8	S	RRDMQPLSPISVHER	P28749	RBL1	Q00537	PCTAIRE2	String	CMGC/CDK	2.43	1.11
P28749	8	S	RRDMQPLSPISVHER	P28749	RBL1	Q00536	PCTAIRE1	String	CMGC/CDK	2.43	1.11
P28749	8	S	RRDMQPLSPISVHER	P28749	RBL1	Q00535	CDK5	String	CMGC/CDK	2.43	1.11
P28749	8	S	RRDMQPLSPISVHER	P28749	RBL1	Q00534	CDK6	String	CMGC/CDK	2.43	1.11
P28749	8	S	RRDMQPLSPISVHER	P28749	RBL1	O94921	PFTAIRE1	String	CMGC/CDK	2.43	1.11
P28749	8	S	RRDMQPLSPISVHER	P28749	RBL1	P28482	Erk2	String	CMGC/MAPK	2.67	1.17
P28749	8	S	RRDMQPLSPISVHER	P28749	RBL1	Q16539	p38a	String	CMGC/MAPK	2.67	1.17
P28749	8	S	RRDMQPLSPISVHER	P28749	RBL1	O15264	p38d	String	CMGC/MAPK	2.67	1.17
P28749	8	S	RRDMQPLSPISVHER	P28749	RBL1	Q00526	CDK3	String	CMGC/CDK/CDC2	2.79	1.58
P28749	8	S	RRDMQPLSPISVHER	P28749	RBL1	P06493	CDC2	String	CMGC/CDK/CDC2	2.79	1.58
P28749	8	S	RRDMQPLSPISVHER	P28749	RBL1	P24941	CDK2	Exp.&String	CMGC/CDK/CDC2	2.79	1.58
H0YE05	8	T	KRSFAPSTPLTGRRY	P28749	RBL1	B4DH08	CDKL2	String	CMGC	3.13	1.46
H0YE05	8	T	KRSFAPSTPLTGRRY	P28749	RBL1	O76039	CDKL5	String	CMGC	3.13	1.46
H0YE05	8	T	KRSFAPSTPLTGRRY	P28749	RBL1	C9JQJ0	SRPK2	String	CMGC	3.13	1.46
H0YE05	8	T	KRSFAPSTPLTGRRY	P28749	RBL1	P20794	MAK	String	CMGC	3.13	1.46
H0YE05	8	T	KRSFAPSTPLTGRRY	P28749	RBL1	Q9HAZ1	CLK4	String	CMGC	3.13	1.46
H0YE05	8	T	KRSFAPSTPLTGRRY	P28749	RBL1	Q59FC5	CLK3	String	CMGC	3.13	1.46
H0YE05	8	T	KRSFAPSTPLTGRRY	P28749	RBL1	P49760	CLK2	String	CMGC	3.13	1.46
H0YE05	8	T	KRSFAPSTPLTGRRY	P28749	RBL1	B4DFW7	CLK1	String	CMGC	3.13	1.46
H0YE05	8	T	KRSFAPSTPLTGRRY	P28749	RBL1	Q2NME9	CDKL4	String	CMGC	3.13	1.46
H0YE05	8	T	KRSFAPSTPLTGRRY	P28749	RBL1	Q9UPE1	MSSK1	String	CMGC	3.13	1.46
H0YE05	8	T	KRSFAPSTPLTGRRY	P28749	RBL1	Q00532	CDKL1	String	CMGC	3.13	1.46
H0YE05	8	T	KRSFAPSTPLTGRRY	P28749	RBL1	Q9UPZ9	ICK	String	CMGC	3.13	1.46
H0YE05	8	T	KRSFAPSTPLTGRRY	P28749	RBL1	Q9BWU1	CDK11	String	CMGC/CDK	2.56	1.11
H0YE05	8	T	KRSFAPSTPLTGRRY	P28749	RBL1	P21127	PITSLRE	String	CMGC/CDK	2.56	1.11
H0YE05	8	T	KRSFAPSTPLTGRRY	P28749	RBL1	Q15131	CDK10	String	CMGC/CDK	2.56	1.11
H0YE05	8	T	KRSFAPSTPLTGRRY	P28749	RBL1	P49336	CDK8	String	CMGC/CDK	2.56	1.11
H0YE05	8	T	KRSFAPSTPLTGRRY	P28749	RBL1	P50750	CDK9	String	CMGC/CDK	2.56	1.11
H0YE05	8	T	KRSFAPSTPLTGRRY	P28749	RBL1	Q8IZL9	CCRK	String	CMGC/CDK	2.56	1.11
H0YE05	8	T	KRSFAPSTPLTGRRY	P28749	RBL1	B4DK03	PCTAIRE3	String	CMGC/CDK	2.56	1.11
H0YE05	8	T	KRSFAPSTPLTGRRY	P28749	RBL1	P50613	CDK7	String	CMGC/CDK	2.56	1.11
H0YE05	8	T	KRSFAPSTPLTGRRY	P28749	RBL1	Q14004	CHED	String	CMGC/CDK	2.56	1.11
H0YE05	8	T	KRSFAPSTPLTGRRY	P28749	RBL1	Q96Q40	PFTAIRE2	String	CMGC/CDK	2.56	1.11
H0YE05	8	T	KRSFAPSTPLTGRRY	P28749	RBL1	Q9NYV4	CRK7	String	CMGC/CDK	2.56	1.11
H0YE05	8	T	KRSFAPSTPLTGRRY	P28749	RBL1	P11802	CDK4	Exp.&String	CMGC/CDK	2.56	1.11
H0YE05	8	T	KRSFAPSTPLTGRRY	P28749	RBL1	Q00537	PCTAIRE2	String	CMGC/CDK	2.56	1.11
H0YE05	8	T	KRSFAPSTPLTGRRY	P28749	RBL1	Q00536	PCTAIRE1	String	CMGC/CDK	2.56	1.11
H0YE05	8	T	KRSFAPSTPLTGRRY	P28749	RBL1	Q00535	CDK5	String	CMGC/CDK	2.56	1.11
H0YE05	8	T	KRSFAPSTPLTGRRY	P28749	RBL1	Q00534	CDK6	String	CMGC/CDK	2.56	1.11
H0YE05	8	T	KRSFAPSTPLTGRRY	P28749	RBL1	O94921	PFTAIRE1	String	CMGC/CDK	2.56	1.11
H0YE05	8	T	KRSFAPSTPLTGRRY	P28749	RBL1	P28482	Erk2	String	CMGC/MAPK	2.38	1.17
H0YE05	8	T	KRSFAPSTPLTGRRY	P28749	RBL1	Q16539	p38a	String	CMGC/MAPK	2.38	1.17
H0YE05	8	T	KRSFAPSTPLTGRRY	P28749	RBL1	O15264	p38d	String	CMGC/MAPK	2.38	1.17
H0YE05	8	T	KRSFAPSTPLTGRRY	P28749	RBL1	Q00526	CDK3	String	CMGC/CDK/CDC2	3	1.58
H0YE05	8	T	KRSFAPSTPLTGRRY	P28749	RBL1	P06493	CDC2	String	CMGC/CDK/CDC2	3	1.58
H0YE05	8	T	KRSFAPSTPLTGRRY	P28749	RBL1	P24941	CDK2	Exp.&String	CMGC/CDK/CDC2	3	1.58
P30291	8	T	RLFDTPHTPKSLLSK	P30291	Wee1	Q59FC5	CLK3	String	CMGC	2.8	1.46
P30291	8	T	RLFDTPHTPKSLLSK	P30291	Wee1	P49760	CLK2	String	CMGC	2.8	1.46
P30291	8	T	RLFDTPHTPKSLLSK	P30291	Wee1	B4DFW7	CLK1	String	CMGC	2.8	1.46
P30291	8	T	RLFDTPHTPKSLLSK	P30291	Wee1	Q2NME9	CDKL4	String	CMGC	2.8	1.46
P30291	8	T	RLFDTPHTPKSLLSK	P30291	Wee1	Q9UPE1	MSSK1	String	CMGC	2.8	1.46
P30291	8	T	RLFDTPHTPKSLLSK	P30291	Wee1	Q00532	CDKL1	String	CMGC	2.8	1.46
P30291	8	T	RLFDTPHTPKSLLSK	P30291	Wee1	Q9UPZ9	ICK	String	CMGC	2.8	1.46
P30291	8	T	RLFDTPHTPKSLLSK	P30291	Wee1	Q9BWU1	CDK11	String	CMGC/CDK	2.18	1.11
P30291	8	T	RLFDTPHTPKSLLSK	P30291	Wee1	P21127	PITSLRE	String	CMGC/CDK	2.18	1.11
P30291	8	T	RLFDTPHTPKSLLSK	P30291	Wee1	Q15131	CDK10	String	CMGC/CDK	2.18	1.11
P30291	8	T	RLFDTPHTPKSLLSK	P30291	Wee1	P49336	CDK8	String	CMGC/CDK	2.18	1.11
P30291	8	T	RLFDTPHTPKSLLSK	P30291	Wee1	P50750	CDK9	String	CMGC/CDK	2.18	1.11
P30291	8	T	RLFDTPHTPKSLLSK	P30291	Wee1	Q8IZL9	CCRK	String	CMGC/CDK	2.18	1.11
P30291	8	T	RLFDTPHTPKSLLSK	P30291	Wee1	B4DK03	PCTAIRE3	String	CMGC/CDK	2.18	1.11
P30291	8	T	RLFDTPHTPKSLLSK	P30291	Wee1	P50613	CDK7	String	CMGC/CDK	2.18	1.11
P30291	8	T	RLFDTPHTPKSLLSK	P30291	Wee1	Q14004	CHED	String	CMGC/CDK	2.18	1.11
P30291	8	T	RLFDTPHTPKSLLSK	P30291	Wee1	Q96Q40	PFTAIRE2	String	CMGC/CDK	2.18	1.11
P30291	8	T	RLFDTPHTPKSLLSK	P30291	Wee1	Q9NYV4	CRK7	String	CMGC/CDK	2.18	1.11
P30291	8	T	RLFDTPHTPKSLLSK	P30291	Wee1	P11802	CDK4	String	CMGC/CDK	2.18	1.11
P30291	8	T	RLFDTPHTPKSLLSK	P30291	Wee1	Q00537	PCTAIRE2	String	CMGC/CDK	2.18	1.11
P30291	8	T	RLFDTPHTPKSLLSK	P30291	Wee1	Q00536	PCTAIRE1	String	CMGC/CDK	2.18	1.11
P30291	8	T	RLFDTPHTPKSLLSK	P30291	Wee1	Q00535	CDK5	String	CMGC/CDK	2.18	1.11
P30291	8	T	RLFDTPHTPKSLLSK	P30291	Wee1	Q00534	CDK6	String	CMGC/CDK	2.18	1.11
P30291	8	T	RLFDTPHTPKSLLSK	P30291	Wee1	O94921	PFTAIRE1	String	CMGC/CDK	2.18	1.11
P30291	8	T	RLFDTPHTPKSLLSK	P30291	Wee1	P27361	Erk1	String	CMGC/MAPK	2.16	1.17
P30291	8	T	RLFDTPHTPKSLLSK	P30291	Wee1	Q13164	Erk5	String	CMGC/MAPK	2.16	1.17
P30291	8	T	RLFDTPHTPKSLLSK	P30291	Wee1	Q16659	Erk3	String	CMGC/MAPK	2.16	1.17
P30291	8	T	RLFDTPHTPKSLLSK	P30291	Wee1	A8MTD8	JNK3	String	CMGC/MAPK	2.16	1.17
P30291	8	T	RLFDTPHTPKSLLSK	P30291	Wee1	D3DX92	JNK1	String	CMGC/MAPK	2.16	1.17
P30291	8	T	RLFDTPHTPKSLLSK	P30291	Wee1	Q15759	p38b	String	CMGC/MAPK	2.16	1.17
P30291	8	T	RLFDTPHTPKSLLSK	P30291	Wee1	P45984	JNK2	String	CMGC/MAPK	2.16	1.17
P30291	8	T	RLFDTPHTPKSLLSK	P30291	Wee1	P28482	Erk2	String	CMGC/MAPK	2.16	1.17
P30291	8	T	RLFDTPHTPKSLLSK	P30291	Wee1	Q16539	p38a	String	CMGC/MAPK	2.16	1.17
P30291	8	T	RLFDTPHTPKSLLSK	P30291	Wee1	O15264	p38d	String	CMGC/MAPK	2.16	1.17
P30291	8	T	RLFDTPHTPKSLLSK	P30291	Wee1	Q00526	CDK3	String	CMGC/CDK/CDC2	2.94	1.58
P30291	8	T	RLFDTPHTPKSLLSK	P30291	Wee1	P06493	CDC2	Exp.&String	CMGC/CDK/CDC2	2.94	1.58
P30291	8	T	RLFDTPHTPKSLLSK	P30291	Wee1	P24941	CDK2	Exp.&String	CMGC/CDK/CDC2	2.94	1.58
F5H0T1	8	S	AQYNRHDSPEDVKRR	P31948	STIP1	Q13557	CaMK2d	Exp.	CAMK/CAMK2	3.36	1.56
P33176	8	S	PGQHPAASPTHPSAI	P33176	KIF5B	P41279	COT	String	STE/STE-Unique/COT	2.2	1.86
C9J8M6	8	S	RDPGMVRSPQNQYPA	P33993	MCM7	P50613	CDK7	Exp.&String	CMGC/CDK	2.1	1.11
C9J8M6	8	S	RDPGMVRSPQNQYPA	P33993	MCM7	Q14004	CHED	Exp.&String	CMGC/CDK	2.1	1.11
C9J8M6	8	S	RDPGMVRSPQNQYPA	P33993	MCM7	Q96Q40	PFTAIRE2	Exp.&String	CMGC/CDK	2.1	1.11
C9J8M6	8	S	RDPGMVRSPQNQYPA	P33993	MCM7	Q9NYV4	CRK7	Exp.&String	CMGC/CDK	2.1	1.11
C9J8M6	8	S	RDPGMVRSPQNQYPA	P33993	MCM7	P11802	CDK4	String	CMGC/CDK	2.1	1.11
C9J8M6	8	S	RDPGMVRSPQNQYPA	P33993	MCM7	Q00537	PCTAIRE2	String	CMGC/CDK	2.1	1.11
C9J8M6	8	S	RDPGMVRSPQNQYPA	P33993	MCM7	Q00536	PCTAIRE1	String	CMGC/CDK	2.1	1.11
C9J8M6	8	S	RDPGMVRSPQNQYPA	P33993	MCM7	Q00535	CDK5	String	CMGC/CDK	2.1	1.11
C9J8M6	8	S	RDPGMVRSPQNQYPA	P33993	MCM7	Q00534	CDK6	String	CMGC/CDK	2.1	1.11
C9J8M6	8	S	RDPGMVRSPQNQYPA	P33993	MCM7	O94921	PFTAIRE1	String	CMGC/CDK	2.1	1.11
C9J8M6	8	S	RDPGMVRSPQNQYPA	P33993	MCM7	P53778	p38g	String	CMGC/MAPK	1.71	1.17
C9J8M6	8	S	RDPGMVRSPQNQYPA	P33993	MCM7	P27361	Erk1	String	CMGC/MAPK	1.71	1.17
C9J8M6	8	S	RDPGMVRSPQNQYPA	P33993	MCM7	Q13164	Erk5	String	CMGC/MAPK	1.71	1.17
C9J8M6	8	S	RDPGMVRSPQNQYPA	P33993	MCM7	Q16659	Erk3	String	CMGC/MAPK	1.71	1.17
C9J8M6	8	S	RDPGMVRSPQNQYPA	P33993	MCM7	A8MTD8	JNK3	String	CMGC/MAPK	1.71	1.17
C9J8M6	8	S	RDPGMVRSPQNQYPA	P33993	MCM7	D3DX92	JNK1	String	CMGC/MAPK	1.71	1.17
C9J8M6	8	S	RDPGMVRSPQNQYPA	P33993	MCM7	Q15759	p38b	String	CMGC/MAPK	1.71	1.17
C9J8M6	8	S	RDPGMVRSPQNQYPA	P33993	MCM7	P45984	JNK2	String	CMGC/MAPK	1.71	1.17
C9J8M6	8	S	RDPGMVRSPQNQYPA	P33993	MCM7	P28482	Erk2	String	CMGC/MAPK	1.71	1.17
C9J8M6	8	S	RDPGMVRSPQNQYPA	P33993	MCM7	Q16539	p38a	String	CMGC/MAPK	1.71	1.17
C9J8M6	8	S	RDPGMVRSPQNQYPA	P33993	MCM7	O15264	p38d	String	CMGC/MAPK	1.71	1.17
C9J8M6	8	S	RDPGMVRSPQNQYPA	P33993	MCM7	P24941	CDK2	String	CMGC/CDK/CDC2	3.48	1.58
P34932	8	S	RFHGRAFSDPFVEAE	P34932	HSPA4	Q9BXA6	SSTK	String	CAMK	1.27	1.17
P34932	8	S	RFHGRAFSDPFVEAE	P34932	HSPA4	B7ZKY2	CASK	String	CAMK	1.27	1.17
P34932	8	S	RFHGRAFSDPFVEAE	P34932	HSPA4	Q9BXA7	TSSK1	String	CAMK	1.27	1.17
P34932	8	S	RFHGRAFSDPFVEAE	P34932	HSPA4	O75962	Trio	String	CAMK	1.27	1.17
P34932	8	S	RFHGRAFSDPFVEAE	P34932	HSPA4	Q96RU8	Trb1	String	CAMK	1.27	1.17
P34932	8	S	RFHGRAFSDPFVEAE	P34932	HSPA4	Q96RU7	Trb3	String	CAMK	1.27	1.17
P34932	8	S	RFHGRAFSDPFVEAE	P34932	HSPA4	Q9C098	DCLK3	String	CAMK	1.27	1.17
P34932	8	S	RFHGRAFSDPFVEAE	P34932	HSPA4	Q8N568	DCLK2	String	CAMK	1.27	1.17
P34932	8	S	RFHGRAFSDPFVEAE	P34932	HSPA4	A6NGQ3	Obscn	String	CAMK	1.27	1.17
P34932	8	S	RFHGRAFSDPFVEAE	P34932	HSPA4	Q15772	SPEG	String	CAMK	1.27	1.17
P34932	8	S	RFHGRAFSDPFVEAE	P34932	HSPA4	Q6SA08	TSSK4	String	CAMK	1.27	1.17
P34932	8	S	RFHGRAFSDPFVEAE	P34932	HSPA4	O15075	DCLK1	String	CAMK	1.27	1.17
P34932	8	S	RFHGRAFSDPFVEAE	P34932	HSPA4	Q96QS6	PSKH2	String	CAMK	1.27	1.17
P34932	8	S	RFHGRAFSDPFVEAE	P34932	HSPA4	Q92519	Trb2	String	CAMK	1.27	1.17
P34932	8	S	RFHGRAFSDPFVEAE	P34932	HSPA4	Q86V86	PIM3	String	CAMK	1.27	1.17
P34932	8	S	RFHGRAFSDPFVEAE	P34932	HSPA4	O60229	Trad	String	CAMK	1.27	1.17
P34932	8	S	RFHGRAFSDPFVEAE	P34932	HSPA4	P11801	PSKH1	String	CAMK	1.27	1.17
P34932	8	S	RFHGRAFSDPFVEAE	P34932	HSPA4	Q96PN8	TSSK3	String	CAMK	1.27	1.17
P34932	8	S	RFHGRAFSDPFVEAE	P34932	HSPA4	Q96PF2	TSSK2	String	CAMK	1.27	1.17
P34932	8	S	RFHGRAFSDPFVEAE	P34932	HSPA4	B2RDF9	VACAMKL	String	CAMK	1.27	1.17
P34932	8	S	RFHGRAFSDPFVEAE	P34932	HSPA4	Q9P1W9	PIM2	String	CAMK	1.27	1.17
P34932	8	S	RFHGRAFSDPFVEAE	P34932	HSPA4	P11309	PIM1	String	CAMK	1.27	1.17
P34932	8	S	RFHGRAFSDPFVEAE	P34932	HSPA4	P31749	AKT1	String	AGC/AKT	1.9	1.64
P35367	8	S	KGKLRSGSNTGLDYI	P35367	HRH1	Q13237	PKG2	String	AGC/PKG	1.93	1.72
P35367	8	S	KGKLRSGSNTGLDYI	P35367	HRH1	A5YM56	PKG1	String	AGC/PKG	1.93	1.72
P35367	8	S	KGKLRSGSNTGLDYI	P35367	HRH1	Q13555	CaMK2g	String	CAMK/CAMK2	1.87	1.56
P35367	8	S	KGKLRSGSNTGLDYI	P35367	HRH1	Q13554	CaMK2b	String	CAMK/CAMK2	1.87	1.56
P35367	8	S	KGKLRSGSNTGLDYI	P35367	HRH1	Q13557	CaMK2d	String	CAMK/CAMK2	1.87	1.56
P35367	8	S	KGKLRSGSNTGLDYI	P35367	HRH1	Q7KZI7	MARK2	String	CAMK/CAMKL	1.92	1.28
P35367	8	S	KGKLRSGSNTGLDYI	P35367	HRH1	Q8IWQ3	BRSK2	String	CAMK/CAMKL	1.92	1.28
P35367	8	S	KGKLRSGSNTGLDYI	P35367	HRH1	Q1KKQ2	PKD1	String	CAMK/PKD	2.8	2.13
P35568	8	S	GCRRRHSSETFSSTP	P35568	IRS1	Q96S38	RSKL1	String	AGC	3.76	1.94
P35568	8	S	GCRRRHSSETFSSTP	P35568	IRS1	Q15208	NDR1	String	AGC	3.76	1.94
P35568	8	S	GCRRRHSSETFSSTP	P35568	IRS1	O60307	MAST3	String	AGC	3.76	1.94
P35568	8	S	GCRRRHSSETFSSTP	P35568	IRS1	Q9Y2H9	MAST1	String	AGC	3.76	1.94
P35568	8	S	GCRRRHSSETFSSTP	P35568	IRS1	Q96GX5	MASTL	String	AGC	3.76	1.94
P35568	8	S	GCRRRHSSETFSSTP	P35568	IRS1	Q9Y6S9	RSKL2	String	AGC	3.76	1.94
P35568	8	S	GCRRRHSSETFSSTP	P35568	IRS1	Q96LW2	SgK494	String	AGC	3.76	1.94
P35568	8	S	GCRRRHSSETFSSTP	P35568	IRS1	Q9NY57	YANK2	String	AGC	3.76	1.94
P35568	8	S	GCRRRHSSETFSSTP	P35568	IRS1	Q9Y2H1	NDR2	String	AGC	3.76	1.94
P35568	8	S	GCRRRHSSETFSSTP	P35568	IRS1	Q9NRM7	LATS2	String	AGC	3.76	1.94
P35568	8	S	GCRRRHSSETFSSTP	P35568	IRS1	Q6P0Q8	MAST2	String	AGC	3.76	1.94
P35568	8	S	GCRRRHSSETFSSTP	P35568	IRS1	O95835	LATS1	String	AGC	3.76	1.94
P35568	8	S	GCRRRHSSETFSSTP	P35568	IRS1	Q6P5Z2	PKN3	String	AGC	3.76	1.94
P35568	8	S	GCRRRHSSETFSSTP	P35568	IRS1	Q8WU08	YANK1	String	AGC	3.76	1.94
P35568	8	S	GCRRRHSSETFSSTP	P35568	IRS1	Q16512	PKN1	String	AGC	3.76	1.94
P35568	8	S	GCRRRHSSETFSSTP	P35568	IRS1	Q16513	PKN2	String	AGC	3.76	1.94
P35568	8	S	GCRRRHSSETFSSTP	P35568	IRS1	Q86UX6	YANK3	String	AGC	3.76	1.94
P35568	8	S	GCRRRHSSETFSSTP	P35568	IRS1	Q96RU7	Trb3	String	CAMK	2.17	1.17
P35568	8	S	GCRRRHSSETFSSTP	P35568	IRS1	Q9C098	DCLK3	String	CAMK	2.17	1.17
P35568	8	S	GCRRRHSSETFSSTP	P35568	IRS1	Q8N568	DCLK2	String	CAMK	2.17	1.17
P35568	8	S	GCRRRHSSETFSSTP	P35568	IRS1	A6NGQ3	Obscn	String	CAMK	2.17	1.17
P35568	8	S	GCRRRHSSETFSSTP	P35568	IRS1	Q15772	SPEG	String	CAMK	2.17	1.17
P35568	8	S	GCRRRHSSETFSSTP	P35568	IRS1	Q6SA08	TSSK4	String	CAMK	2.17	1.17
P35568	8	S	GCRRRHSSETFSSTP	P35568	IRS1	O15075	DCLK1	String	CAMK	2.17	1.17
P35568	8	S	GCRRRHSSETFSSTP	P35568	IRS1	Q96QS6	PSKH2	String	CAMK	2.17	1.17
P35568	8	S	GCRRRHSSETFSSTP	P35568	IRS1	Q92519	Trb2	String	CAMK	2.17	1.17
P35568	8	S	GCRRRHSSETFSSTP	P35568	IRS1	Q86V86	PIM3	String	CAMK	2.17	1.17
P35568	8	S	GCRRRHSSETFSSTP	P35568	IRS1	O60229	Trad	String	CAMK	2.17	1.17
P35568	8	S	GCRRRHSSETFSSTP	P35568	IRS1	P11801	PSKH1	String	CAMK	2.17	1.17
P35568	8	S	GCRRRHSSETFSSTP	P35568	IRS1	Q96PN8	TSSK3	String	CAMK	2.17	1.17
P35568	8	S	GCRRRHSSETFSSTP	P35568	IRS1	Q96PF2	TSSK2	String	CAMK	2.17	1.17
P35568	8	S	GCRRRHSSETFSSTP	P35568	IRS1	B2RDF9	VACAMKL	String	CAMK	2.17	1.17
P35568	8	S	GCRRRHSSETFSSTP	P35568	IRS1	Q9P1W9	PIM2	String	CAMK	2.17	1.17
P35568	8	S	GCRRRHSSETFSSTP	P35568	IRS1	P11309	PIM1	String	CAMK	2.17	1.17
P35568	8	S	GCRRRHSSETFSSTP	P35568	IRS1	Q9Y243	AKT3	String	AGC/AKT	5.8	1.64
P35568	8	S	GCRRRHSSETFSSTP	P35568	IRS1	P31751	AKT2	String	AGC/AKT	5.8	1.64
P35568	8	S	GCRRRHSSETFSSTP	P35568	IRS1	P31749	AKT1	Exp.&String	AGC/AKT	5.8	1.64
P35568	8	S	GCRRRHSSETFSSTP	P35568	IRS1	P41743	PKCi	String	AGC/PKC	3.09	2.36
P35568	8	S	GCRRRHSSETFSSTP	P35568	IRS1	Q04759	PKCt	Exp.&String	AGC/PKC	3.09	2.36
P35568	8	S	GCRRRHSSETFSSTP	P35568	IRS1	D3DWF5	PKCb	String	AGC/PKC	3.09	2.36
P35568	8	S	GCRRRHSSETFSSTP	P35568	IRS1	P17252	PKCa	String	AGC/PKC	3.09	2.36
P35568	8	S	GCRRRHSSETFSSTP	P35568	IRS1	P05129	PKCg	Exp.&String	AGC/PKC	3.09	2.36
P35568	8	S	GCRRRHSSETFSSTP	P35568	IRS1	Q05655	PKCd	Exp.&String	AGC/PKC	3.09	2.36
P35568	8	S	GCRRRHSSETFSSTP	P35568	IRS1	P24723	PKCh	String	AGC/PKC	3.09	2.36
P35568	8	S	GCRRRHSSETFSSTP	P35568	IRS1	Q02156	PKCe	String	AGC/PKC	3.09	2.36
P35568	8	S	GCRRRHSSETFSSTP	P35568	IRS1	Q05513	PKCz	Exp.&String	AGC/PKC	3.09	2.36
P35568	8	S	GCRRRHSSETFSSTP	P35568	IRS1	P23443	p70S6K	String	AGC/RSK	2.9	1.27
P35568	8	S	GCRRRHSSETFSSTP	P35568	IRS1	P51812	RSK2	String	AGC/RSK	2.9	1.27
P35568	8	S	GCRRRHSSETFSSTP	P35568	IRS1	Q15349	RSK1	String	AGC/RSK	2.9	1.27
P35568	8	S	GCRRRHSSETFSSTP	P35568	IRS1	Q9UK32	RSK4	String	AGC/RSK	2.9	1.27
P35568	8	S	GCRRRHSSETFSSTP	P35568	IRS1	O75582	MSK1	String	AGC/RSK	2.9	1.27
P35568	8	S	GCRRRHSSETFSSTP	P35568	IRS1	Q9UBS0	p70S6Kb	String	AGC/RSK	2.9	1.27
P35568	8	S	GCRRRHSSETFSSTP	P35568	IRS1	O75676	MSK2	String	AGC/RSK	2.9	1.27
P35568	8	S	GCRRRHSSETFSSTP	P35568	IRS1	Q9H0K1	QIK	Exp.&String	CAMK/CAMKL	1.79	1.28
P35568	8	S	GCRRRHSSETFSSTP	P35568	IRS1	Q53GX0	MELK	Exp.&String	CAMK/CAMKL	1.79	1.28
P35568	8	S	GCRRRHSSETFSSTP	P35568	IRS1	Q8TDC3	BRSK1	Exp.&String	CAMK/CAMKL	1.79	1.28
P35568	8	S	GCRRRHSSETFSSTP	P35568	IRS1	Q96L34	MARK4	Exp.&String	CAMK/CAMKL	1.79	1.28
P35568	8	S	GCRRRHSSETFSSTP	P35568	IRS1	O60285	NuaK1	Exp.&String	CAMK/CAMKL	1.79	1.28
P35568	8	S	GCRRRHSSETFSSTP	P35568	IRS1	Q9Y2K2	QSK	Exp.&String	CAMK/CAMKL	1.79	1.28
P35568	8	S	GCRRRHSSETFSSTP	P35568	IRS1	Q8IY84	NIM1	Exp.&String	CAMK/CAMKL	1.79	1.28
P35568	8	S	GCRRRHSSETFSSTP	P35568	IRS1	P27448	MARK3	Exp.&String	CAMK/CAMKL	1.79	1.28
P35568	8	S	GCRRRHSSETFSSTP	P35568	IRS1	Q96RG2	PASK	Exp.&String	CAMK/CAMKL	1.79	1.28
P35568	8	S	GCRRRHSSETFSSTP	P35568	IRS1	B4E0Y5	NuaK2	Exp.&String	CAMK/CAMKL	1.79	1.28
P35568	8	S	GCRRRHSSETFSSTP	P35568	IRS1	Q9NRH2	SNRK	Exp.&String	CAMK/CAMKL	1.79	1.28
P35568	8	S	GCRRRHSSETFSSTP	P35568	IRS1	Q7KZI7	MARK2	Exp.&String	CAMK/CAMKL	1.79	1.28
P35568	8	S	GCRRRHSSETFSSTP	P35568	IRS1	Q8IWQ3	BRSK2	Exp.&String	CAMK/CAMKL	1.79	1.28
P35568	8	S	GCRRRHSSETFSSTP	P35568	IRS1	O94806	PKD3	String	CAMK/PKD	4.7	2.13
P35568	8	S	GCRRRHSSETFSSTP	P35568	IRS1	Q9BZL6	PKD2	String	CAMK/PKD	4.7	2.13
P35568	8	S	GCRRRHSSETFSSTP	P35568	IRS1	Q1KKQ2	PKD1	String	CAMK/PKD	4.7	2.13
P35568	8	S	GCRRRHSSETFSSTP	P35568	IRS1	O96017	CHK2	String	CAMK/RAD53	1.94	1.77
P35568	8	S	GCRRRHSSETFSSTP	P35568	IRS1	Q9UEW8	STLK3	String	STE/STE20	1.41	1.4
P35568	8	S	GCRRRHSSETFSSTP	P35568	IRS1	Q5U0E6	MST3	String	STE/STE20	1.41	1.4
P35568	8	S	GCRRRHSSETFSSTP	P35568	IRS1	Q13043	MST1	String	STE/STE20	1.41	1.4
P35568	8	S	GCRRRHSSETFSSTP	P35568	IRS1	B2RCU6	PAK3	String	STE/STE20	1.41	1.4
P35568	8	S	GCRRRHSSETFSSTP	P35568	IRS1	Q12851	GCK	String	STE/STE20	1.41	1.4
P35568	8	S	GCRRRHSSETFSSTP	P35568	IRS1	Q9NQU5	PAK6	String	STE/STE20	1.41	1.4
P35568	8	S	GCRRRHSSETFSSTP	P35568	IRS1	Q9UKE5	TNIK	String	STE/STE20	1.41	1.4
P35568	8	S	GCRRRHSSETFSSTP	P35568	IRS1	Q13188	MST2	String	STE/STE20	1.41	1.4
P35568	8	S	GCRRRHSSETFSSTP	P35568	IRS1	Q7L7X3	TAO1	String	STE/STE20	1.41	1.4
P35568	8	S	GCRRRHSSETFSSTP	P35568	IRS1	Q9Y4K4	KHS1	String	STE/STE20	1.41	1.4
P35568	8	S	GCRRRHSSETFSSTP	P35568	IRS1	Q8NEV4	MYO3A	String	STE/STE20	1.41	1.4
P35568	8	S	GCRRRHSSETFSSTP	P35568	IRS1	Q9H2K8	TAO3	String	STE/STE20	1.41	1.4
P35568	8	S	GCRRRHSSETFSSTP	P35568	IRS1	Q53TX8	HGK	String	STE/STE20	1.41	1.4
P35568	8	S	GCRRRHSSETFSSTP	P35568	IRS1	D3DRA1	SLK	String	STE/STE20	1.41	1.4
P35568	8	S	GCRRRHSSETFSSTP	P35568	IRS1	Q13153	PAK1	String	STE/STE20	1.41	1.4
P35568	8	S	GCRRRHSSETFSSTP	P35568	IRS1	Q8N4C8	MINK	String	STE/STE20	1.41	1.4
P35568	8	S	GCRRRHSSETFSSTP	P35568	IRS1	Q9C0K7	STLK6	String	STE/STE20	1.41	1.4
P35568	8	S	GCRRRHSSETFSSTP	P35568	IRS1	O96013	PAK4	String	STE/STE20	1.41	1.4
P35568	8	S	GCRRRHSSETFSSTP	P35568	IRS1	Q92918	HPK1	String	STE/STE20	1.41	1.4
P35568	8	S	GCRRRHSSETFSSTP	P35568	IRS1	O00506	YSK1	String	STE/STE20	1.41	1.4
P35568	8	S	GCRRRHSSETFSSTP	P35568	IRS1	Q13177	PAK2	String	STE/STE20	1.41	1.4
P35568	8	S	GCRRRHSSETFSSTP	P35568	IRS1	O94804	LOK	String	STE/STE20	1.41	1.4
P35568	8	S	GCRRRHSSETFSSTP	P35568	IRS1	Q7RTN6	STLK5	String	STE/STE20	1.41	1.4
P35568	8	S	GCRRRHSSETFSSTP	P35568	IRS1	C9J3X5	MYO3B	String	STE/STE20	1.41	1.4
P35568	8	S	GCRRRHSSETFSSTP	P35568	IRS1	Q8IVH8	KHS2	String	STE/STE20	1.41	1.4
P35568	8	S	GCRRRHSSETFSSTP	P35568	IRS1	Q9P286	PAK5	String	STE/STE20	1.41	1.4
P35568	8	S	GCRRRHSSETFSSTP	P35568	IRS1	O95747	OSR1	String	STE/STE20	1.41	1.4
P35568	8	S	GCRRRHSSETFSSTP	P35568	IRS1	Q9P289	MST4	String	STE/STE20	1.41	1.4
P35568	8	S	GCRRRHSSETFSSTP	P35568	IRS1	Q7Z2Y5	NRK	String	STE/STE20	1.41	1.4
P35568	8	S	GCRRRHSSETFSSTP	P35568	IRS1	O75116	ROCK2	String	AGC/DMPK/ROCK	1.84	1.78
P35568	8	S	GCRRRHSSETFSSTP	P35568	IRS1	Q13464	ROCK1	Exp.&String	AGC/DMPK/ROCK	1.84	1.78
P35568	8	T	TPDSLGHTPPARGEE	P35568	IRS1	Q00535	CDK5	String	CMGC/CDK	1.98	1.11
P35568	8	T	TPDSLGHTPPARGEE	P35568	IRS1	Q00534	CDK6	String	CMGC/CDK	1.98	1.11
P35568	8	T	TPDSLGHTPPARGEE	P35568	IRS1	O94921	PFTAIRE1	String	CMGC/CDK	1.98	1.11
P35568	8	T	TPDSLGHTPPARGEE	P35568	IRS1	P49840	GSK3A	String	CMGC/GSK	2.21	1.62
P35568	8	T	TPDSLGHTPPARGEE	P35568	IRS1	P31152	Erk4	String	CMGC/MAPK	1.69	1.17
P35568	8	T	TPDSLGHTPPARGEE	P35568	IRS1	Q8TD08	Erk7	String	CMGC/MAPK	1.69	1.17
P35568	8	T	TPDSLGHTPPARGEE	P35568	IRS1	P53778	p38g	String	CMGC/MAPK	1.69	1.17
P35568	8	T	TPDSLGHTPPARGEE	P35568	IRS1	P27361	Erk1	String	CMGC/MAPK	1.69	1.17
P35568	8	T	TPDSLGHTPPARGEE	P35568	IRS1	Q13164	Erk5	String	CMGC/MAPK	1.69	1.17
P35568	8	T	TPDSLGHTPPARGEE	P35568	IRS1	Q16659	Erk3	String	CMGC/MAPK	1.69	1.17
P35568	8	T	TPDSLGHTPPARGEE	P35568	IRS1	A8MTD8	JNK3	String	CMGC/MAPK	1.69	1.17
P35568	8	T	TPDSLGHTPPARGEE	P35568	IRS1	D3DX92	JNK1	String	CMGC/MAPK	1.69	1.17
P35568	8	T	TPDSLGHTPPARGEE	P35568	IRS1	Q15759	p38b	String	CMGC/MAPK	1.69	1.17
P35568	8	T	TPDSLGHTPPARGEE	P35568	IRS1	P45984	JNK2	Exp.	CMGC/MAPK	1.69	1.17
P35568	8	T	TPDSLGHTPPARGEE	P35568	IRS1	P28482	Erk2	Exp.&String	CMGC/MAPK	1.69	1.17
P35568	8	T	TPDSLGHTPPARGEE	P35568	IRS1	Q16539	p38a	String	CMGC/MAPK	1.69	1.17
P35568	8	T	TPDSLGHTPPARGEE	P35568	IRS1	O15264	p38d	String	CMGC/MAPK	1.69	1.17
P35568	8	T	TPDSLGHTPPARGEE	P35568	IRS1	P42345	FRAP	Exp.&String	Atypical/PIKK/FRAP	3	2.79
G5E9C7	8	S	EGEPHSISPRPRPPG	P36507	MAP2K2	P49137	MAPKAPK2	String	CAMK/MAPKAPK	2.42	1.85
G5E9C7	8	S	EGEPHSISPRPRPPG	P36507	MAP2K2	Q16644	MAPKAPK3	String	CAMK/MAPKAPK	2.42	1.85
G5E9C7	8	S	EGEPHSISPRPRPPG	P36507	MAP2K2	Q8IW41	MAPKAPK5	String	CAMK/MAPKAPK	2.42	1.85
G5E9C7	8	S	EGEPHSISPRPRPPG	P36507	MAP2K2	A4CYL7	MNK2	String	CAMK/MAPKAPK	2.42	1.85
G5E9C7	8	S	EGEPHSISPRPRPPG	P36507	MAP2K2	B5BUJ6	MNK1	String	CAMK/MAPKAPK	2.42	1.85
G5E9C7	8	S	EGEPHSISPRPRPPG	P36507	MAP2K2	Q00536	PCTAIRE1	String	CMGC/CDK	1.79	1.11
G5E9C7	8	S	EGEPHSISPRPRPPG	P36507	MAP2K2	Q00535	CDK5	String	CMGC/CDK	1.79	1.11
G5E9C7	8	S	EGEPHSISPRPRPPG	P36507	MAP2K2	Q00534	CDK6	String	CMGC/CDK	1.79	1.11
G5E9C7	8	S	EGEPHSISPRPRPPG	P36507	MAP2K2	O94921	PFTAIRE1	String	CMGC/CDK	1.79	1.11
G5E9C7	8	S	EGEPHSISPRPRPPG	P36507	MAP2K2	P49840	GSK3A	String	CMGC/GSK	3.73	1.62
G5E9C7	8	S	EGEPHSISPRPRPPG	P36507	MAP2K2	P31152	Erk4	String	CMGC/MAPK	1.66	1.17
G5E9C7	8	S	EGEPHSISPRPRPPG	P36507	MAP2K2	Q8TD08	Erk7	String	CMGC/MAPK	1.66	1.17
G5E9C7	8	S	EGEPHSISPRPRPPG	P36507	MAP2K2	P53778	p38g	String	CMGC/MAPK	1.66	1.17
G5E9C7	8	S	EGEPHSISPRPRPPG	P36507	MAP2K2	P27361	Erk1	Exp.&String	CMGC/MAPK	1.66	1.17
G5E9C7	8	S	EGEPHSISPRPRPPG	P36507	MAP2K2	Q13164	Erk5	String	CMGC/MAPK	1.66	1.17
G5E9C7	8	S	EGEPHSISPRPRPPG	P36507	MAP2K2	Q16659	Erk3	String	CMGC/MAPK	1.66	1.17
G5E9C7	8	S	EGEPHSISPRPRPPG	P36507	MAP2K2	A8MTD8	JNK3	String	CMGC/MAPK	1.66	1.17
G5E9C7	8	S	EGEPHSISPRPRPPG	P36507	MAP2K2	D3DX92	JNK1	String	CMGC/MAPK	1.66	1.17
G5E9C7	8	S	EGEPHSISPRPRPPG	P36507	MAP2K2	Q15759	p38b	String	CMGC/MAPK	1.66	1.17
G5E9C7	8	S	EGEPHSISPRPRPPG	P36507	MAP2K2	P45984	JNK2	String	CMGC/MAPK	1.66	1.17
G5E9C7	8	S	EGEPHSISPRPRPPG	P36507	MAP2K2	P28482	Erk2	Exp.&String	CMGC/MAPK	1.66	1.17
G5E9C7	8	S	EGEPHSISPRPRPPG	P36507	MAP2K2	Q16539	p38a	String	CMGC/MAPK	1.66	1.17
G5E9C7	8	S	EGEPHSISPRPRPPG	P36507	MAP2K2	O15264	p38d	String	CMGC/MAPK	1.66	1.17
G5E9C7	8	S	EGEPHSISPRPRPPG	P36507	MAP2K2	P42345	FRAP	String	Atypical/PIKK/FRAP	6.53	2.79
P38919	8	T	GQHVVAGTPGRVFDM	P38919	EIF4A3	P06493	CDC2	String	CMGC/CDK/CDC2	2.36	1.58
P38919	8	T	GQHVVAGTPGRVFDM	P38919	EIF4A3	P24941	CDK2	String	CMGC/CDK/CDC2	2.36	1.58
P40126	8	T	RRLRKGYTPLMETHL	P40126	DCT	P11802	CDK4	String	CMGC/CDK	1.66	1.11
P40126	8	T	RRLRKGYTPLMETHL	P40126	DCT	Q00537	PCTAIRE2	String	CMGC/CDK	1.66	1.11
P40126	8	T	RRLRKGYTPLMETHL	P40126	DCT	Q00536	PCTAIRE1	String	CMGC/CDK	1.66	1.11
P40126	8	T	RRLRKGYTPLMETHL	P40126	DCT	Q00535	CDK5	String	CMGC/CDK	1.66	1.11
P40126	8	T	RRLRKGYTPLMETHL	P40126	DCT	Q00534	CDK6	String	CMGC/CDK	1.66	1.11
P40126	8	T	RRLRKGYTPLMETHL	P40126	DCT	O94921	PFTAIRE1	String	CMGC/CDK	1.66	1.11
P40126	8	T	GYTPLMETHLSSKRY	P40126	DCT	P57058	HUNK	String	CAMK/CAMKL	1.86	1.28
P40126	8	T	GYTPLMETHLSSKRY	P40126	DCT	Q9P0L2	MARK1	String	CAMK/CAMKL	1.86	1.28
P40126	8	T	GYTPLMETHLSSKRY	P40126	DCT	P57059	SIK	String	CAMK/CAMKL	1.86	1.28
P40126	8	T	GYTPLMETHLSSKRY	P40126	DCT	Q9H0K1	QIK	String	CAMK/CAMKL	1.86	1.28
P40126	8	T	GYTPLMETHLSSKRY	P40126	DCT	Q53GX0	MELK	String	CAMK/CAMKL	1.86	1.28
P40126	8	T	GYTPLMETHLSSKRY	P40126	DCT	Q8TDC3	BRSK1	String	CAMK/CAMKL	1.86	1.28
P40126	8	T	GYTPLMETHLSSKRY	P40126	DCT	Q96L34	MARK4	String	CAMK/CAMKL	1.86	1.28
P40126	8	T	GYTPLMETHLSSKRY	P40126	DCT	O60285	NuaK1	String	CAMK/CAMKL	1.86	1.28
P40126	8	T	GYTPLMETHLSSKRY	P40126	DCT	Q9Y2K2	QSK	String	CAMK/CAMKL	1.86	1.28
P40126	8	T	GYTPLMETHLSSKRY	P40126	DCT	Q8IY84	NIM1	String	CAMK/CAMKL	1.86	1.28
P40126	8	T	GYTPLMETHLSSKRY	P40126	DCT	P27448	MARK3	String	CAMK/CAMKL	1.86	1.28
P40126	8	T	GYTPLMETHLSSKRY	P40126	DCT	Q96RG2	PASK	String	CAMK/CAMKL	1.86	1.28
P40126	8	T	GYTPLMETHLSSKRY	P40126	DCT	B4E0Y5	NuaK2	String	CAMK/CAMKL	1.86	1.28
P40126	8	T	GYTPLMETHLSSKRY	P40126	DCT	Q9NRH2	SNRK	String	CAMK/CAMKL	1.86	1.28
P40126	8	T	GYTPLMETHLSSKRY	P40126	DCT	Q7KZI7	MARK2	String	CAMK/CAMKL	1.86	1.28
P40126	8	T	GYTPLMETHLSSKRY	P40126	DCT	Q8IWQ3	BRSK2	String	CAMK/CAMKL	1.86	1.28
P40126	8	S	PLMETHLSSKRYTEE	P40126	DCT	Q13418	ILK	String	TKL/MLK	2.12	1.58
P40126	8	S	PLMETHLSSKRYTEE	P40126	DCT	Q12852	DLK	String	TKL/MLK	2.12	1.58
P40126	8	S	PLMETHLSSKRYTEE	P40126	DCT	Q59H18	HH498	String	TKL/MLK	2.12	1.58
P40126	8	S	PLMETHLSSKRYTEE	P40126	DCT	B8ZZU2	ZAK	String	TKL/MLK	2.12	1.58
P40126	8	S	PLMETHLSSKRYTEE	P40126	DCT	P80192	MLK1	String	TKL/MLK	2.12	1.58
P42338	8	Y	PENKKQPYYYPPFDK	P42338	PIK3CB	Q658W2	FAK	String	TK/Fak	5.08	3.26
P42338	8	Y	PENKKQPYYYPPFDK	P42338	PIK3CB	Q14289	PYK2	String	TK/Fak	5.08	3.26
P42338	8	Y	PENKKQPYYYPPFDK	P42338	PIK3CB	P11362	FGFR1	String	TK/FGFR	2.4	2.14
P42338	8	Y	PENKKQPYYYPPFDK	P42338	PIK3CB	P21802	FGFR2	String	TK/FGFR	2.4	2.14
P42338	8	Y	PENKKQPYYYPPFDK	P42338	PIK3CB	P22455	FGFR4	String	TK/FGFR	2.4	2.14
P42338	8	Y	PENKKQPYYYPPFDK	P42338	PIK3CB	P43403	ZAP70	String	TK/Syk	2.88	2.21
P42338	8	Y	PENKKQPYYYPPFDK	P42338	PIK3CB	P43405	SYK	String	TK/Syk	2.88	2.21
P42338	8	Y	ENKKQPYYYPPFDKI	P42338	PIK3CB	P41240	CSK	String	TK/Csk	5.33	4.61
A8MXP9	8	S	KRHFRRDSFDDRGPS	P43243	MATR3	Q02156	PKCe	String	AGC/PKC	4.58	2.36
A8MXP9	8	S	KRHFRRDSFDDRGPS	P43243	MATR3	Q05513	PKCz	String	AGC/PKC	4.58	2.36
P46013	8	S	TTKIACKSPPPESMD	P46013	MKI67	Q9BWU1	CDK11	String	CMGC/CDK	2.36	1.11
P46013	8	S	TTKIACKSPPPESMD	P46013	MKI67	P21127	PITSLRE	String	CMGC/CDK	2.36	1.11
P46013	8	S	TTKIACKSPPPESMD	P46013	MKI67	Q15131	CDK10	String	CMGC/CDK	2.36	1.11
P46013	8	S	TTKIACKSPPPESMD	P46013	MKI67	P49336	CDK8	String	CMGC/CDK	2.36	1.11
P46013	8	S	TTKIACKSPPPESMD	P46013	MKI67	P50750	CDK9	String	CMGC/CDK	2.36	1.11
P46013	8	S	TTKIACKSPPPESMD	P46013	MKI67	Q8IZL9	CCRK	String	CMGC/CDK	2.36	1.11
P46013	8	S	TTKIACKSPPPESMD	P46013	MKI67	B4DK03	PCTAIRE3	String	CMGC/CDK	2.36	1.11
P46013	8	S	TTKIACKSPPPESMD	P46013	MKI67	P50613	CDK7	String	CMGC/CDK	2.36	1.11
P46013	8	S	TTKIACKSPPPESMD	P46013	MKI67	Q14004	CHED	String	CMGC/CDK	2.36	1.11
P46013	8	S	TTKIACKSPPPESMD	P46013	MKI67	Q96Q40	PFTAIRE2	String	CMGC/CDK	2.36	1.11
P46013	8	S	TTKIACKSPPPESMD	P46013	MKI67	Q9NYV4	CRK7	String	CMGC/CDK	2.36	1.11
P46013	8	S	TTKIACKSPPPESMD	P46013	MKI67	P11802	CDK4	String	CMGC/CDK	2.36	1.11
P46013	8	S	TTKIACKSPPPESMD	P46013	MKI67	Q00537	PCTAIRE2	String	CMGC/CDK	2.36	1.11
P46013	8	S	TTKIACKSPPPESMD	P46013	MKI67	Q00536	PCTAIRE1	String	CMGC/CDK	2.36	1.11
P46013	8	S	TTKIACKSPPPESMD	P46013	MKI67	Q00535	CDK5	String	CMGC/CDK	2.36	1.11
P46013	8	S	TTKIACKSPPPESMD	P46013	MKI67	Q00534	CDK6	String	CMGC/CDK	2.36	1.11
P46013	8	S	TTKIACKSPPPESMD	P46013	MKI67	O94921	PFTAIRE1	String	CMGC/CDK	2.36	1.11
P46013	8	S	TTKIACKSPPPESMD	P46013	MKI67	P36894	BMPR1A	String	TKL/STKR	2.22	2.12
P46013	8	S	TTKIACKSPPPESMD	P46013	MKI67	P36897	TGFbR1	String	TKL/STKR	2.22	2.12
P46013	8	S	TTKIACKSPPPESMD	P46013	MKI67	Q16671	MISR2	String	TKL/STKR	2.22	2.12
P46013	8	S	TTKIACKSPPPESMD	P46013	MKI67	P36896	ALK4	String	TKL/STKR	2.22	2.12
P46013	8	S	TTKIACKSPPPESMD	P46013	MKI67	P37023	ALK1	String	TKL/STKR	2.22	2.12
P46013	8	S	TTKIACKSPPPESMD	P46013	MKI67	Q04771	ALK2	String	TKL/STKR	2.22	2.12
P46013	8	S	TTKIACKSPPPESMD	P46013	MKI67	B4DSV1	BMPR1B	String	TKL/STKR	2.22	2.12
P46013	8	S	TTKIACKSPPPESMD	P46013	MKI67	D2JYI1	TGFbR2	String	TKL/STKR	2.22	2.12
P46013	8	S	TTKIACKSPPPESMD	P46013	MKI67	Q13705	ACTR2B	String	TKL/STKR	2.22	2.12
P46013	8	S	TTKIACKSPPPESMD	P46013	MKI67	Q13873	BMPR2	String	TKL/STKR	2.22	2.12
P46013	8	S	TTKIACKSPPPESMD	P46013	MKI67	Q8NER5	ALK7	String	TKL/STKR	2.22	2.12
P46013	8	S	TTKIACKSPPPESMD	P46013	MKI67	P27037	ACTR2	String	TKL/STKR	2.22	2.12
P46013	8	S	TTKIACKSPPPESMD	P46013	MKI67	Q00526	CDK3	String	CMGC/CDK/CDC2	3.56	1.58
P46013	8	S	TTKIACKSPPPESMD	P46013	MKI67	P06493	CDC2	Exp.&String	CMGC/CDK/CDC2	3.56	1.58
P46013	8	S	TTKIACKSPPPESMD	P46013	MKI67	P24941	CDK2	String	CMGC/CDK/CDC2	3.56	1.58
P46013	8	S	TTKIACKSPPPESMD	P46013	MKI67	P42345	FRAP	String	Atypical/PIKK/FRAP	4.13	2.79
P46013	8	S	TTKIACKSPPPESMD	P46013	MKI67	C7G533	AurB	String	Other/AUR/AUR-B	2.21	2.04
P46013	8	T	DINTFVGTPVEKLDL	P46013	MKI67	Q9BWU1	CDK11	String	CMGC/CDK	1.5	1.11
P46013	8	T	DINTFVGTPVEKLDL	P46013	MKI67	P21127	PITSLRE	String	CMGC/CDK	1.5	1.11
P46013	8	T	DINTFVGTPVEKLDL	P46013	MKI67	Q15131	CDK10	String	CMGC/CDK	1.5	1.11
P46013	8	T	DINTFVGTPVEKLDL	P46013	MKI67	P49336	CDK8	String	CMGC/CDK	1.5	1.11
P46013	8	T	DINTFVGTPVEKLDL	P46013	MKI67	P50750	CDK9	String	CMGC/CDK	1.5	1.11
P46013	8	T	DINTFVGTPVEKLDL	P46013	MKI67	Q8IZL9	CCRK	String	CMGC/CDK	1.5	1.11
P46013	8	T	DINTFVGTPVEKLDL	P46013	MKI67	B4DK03	PCTAIRE3	String	CMGC/CDK	1.5	1.11
P46013	8	T	DINTFVGTPVEKLDL	P46013	MKI67	P50613	CDK7	String	CMGC/CDK	1.5	1.11
P46013	8	T	DINTFVGTPVEKLDL	P46013	MKI67	Q14004	CHED	String	CMGC/CDK	1.5	1.11
P46013	8	T	DINTFVGTPVEKLDL	P46013	MKI67	Q96Q40	PFTAIRE2	String	CMGC/CDK	1.5	1.11
P46013	8	T	DINTFVGTPVEKLDL	P46013	MKI67	Q9NYV4	CRK7	String	CMGC/CDK	1.5	1.11
P46013	8	T	DINTFVGTPVEKLDL	P46013	MKI67	P11802	CDK4	String	CMGC/CDK	1.5	1.11
P46013	8	T	DINTFVGTPVEKLDL	P46013	MKI67	Q00537	PCTAIRE2	String	CMGC/CDK	1.5	1.11
P46013	8	T	DINTFVGTPVEKLDL	P46013	MKI67	Q00536	PCTAIRE1	String	CMGC/CDK	1.5	1.11
P46013	8	T	DINTFVGTPVEKLDL	P46013	MKI67	Q00535	CDK5	String	CMGC/CDK	1.5	1.11
P46013	8	T	DINTFVGTPVEKLDL	P46013	MKI67	Q00534	CDK6	String	CMGC/CDK	1.5	1.11
P46013	8	T	DINTFVGTPVEKLDL	P46013	MKI67	O94921	PFTAIRE1	String	CMGC/CDK	1.5	1.11
P46013	8	T	DINTFVGTPVEKLDL	P46013	MKI67	Q13163	MAP2K5	String	STE/STE7	1.5	1.16
P46013	8	T	DINTFVGTPVEKLDL	P46013	MKI67	P46734	MAP2K3	String	STE/STE7	1.5	1.16
P46013	8	T	DINTFVGTPVEKLDL	P46013	MKI67	Q00526	CDK3	String	CMGC/CDK/CDC2	2.07	1.58
P46013	8	T	DINTFVGTPVEKLDL	P46013	MKI67	P06493	CDC2	Exp.&String	CMGC/CDK/CDC2	2.07	1.58
P46013	8	T	DINTFVGTPVEKLDL	P46013	MKI67	P24941	CDK2	String	CMGC/CDK/CDC2	2.07	1.58
P46013	8	T	DINTFVGTPVEKLDL	P46013	MKI67	P42345	FRAP	String	Atypical/PIKK/FRAP	3.53	2.79
P46013	8	T	GFKELFQTPGHTEEA	P46013	MKI67	Q9BWU1	CDK11	String	CMGC/CDK	1.83	1.11
P46013	8	T	GFKELFQTPGHTEEA	P46013	MKI67	P21127	PITSLRE	String	CMGC/CDK	1.83	1.11
P46013	8	T	GFKELFQTPGHTEEA	P46013	MKI67	Q15131	CDK10	String	CMGC/CDK	1.83	1.11
P46013	8	T	GFKELFQTPGHTEEA	P46013	MKI67	P49336	CDK8	String	CMGC/CDK	1.83	1.11
P46013	8	T	GFKELFQTPGHTEEA	P46013	MKI67	P50750	CDK9	String	CMGC/CDK	1.83	1.11
P46013	8	T	GFKELFQTPGHTEEA	P46013	MKI67	Q8IZL9	CCRK	String	CMGC/CDK	1.83	1.11
P46013	8	T	GFKELFQTPGHTEEA	P46013	MKI67	B4DK03	PCTAIRE3	String	CMGC/CDK	1.83	1.11
P46013	8	T	GFKELFQTPGHTEEA	P46013	MKI67	P50613	CDK7	String	CMGC/CDK	1.83	1.11
P46013	8	T	GFKELFQTPGHTEEA	P46013	MKI67	Q14004	CHED	String	CMGC/CDK	1.83	1.11
P46013	8	T	GFKELFQTPGHTEEA	P46013	MKI67	Q96Q40	PFTAIRE2	String	CMGC/CDK	1.83	1.11
P46013	8	T	GFKELFQTPGHTEEA	P46013	MKI67	Q9NYV4	CRK7	String	CMGC/CDK	1.83	1.11
P46013	8	T	GFKELFQTPGHTEEA	P46013	MKI67	P11802	CDK4	String	CMGC/CDK	1.83	1.11
P46013	8	T	GFKELFQTPGHTEEA	P46013	MKI67	Q00537	PCTAIRE2	String	CMGC/CDK	1.83	1.11
P46013	8	T	GFKELFQTPGHTEEA	P46013	MKI67	Q00536	PCTAIRE1	String	CMGC/CDK	1.83	1.11
P46013	8	T	GFKELFQTPGHTEEA	P46013	MKI67	Q00535	CDK5	String	CMGC/CDK	1.83	1.11
P46013	8	T	GFKELFQTPGHTEEA	P46013	MKI67	Q00534	CDK6	String	CMGC/CDK	1.83	1.11
P46013	8	T	GFKELFQTPGHTEEA	P46013	MKI67	O94921	PFTAIRE1	String	CMGC/CDK	1.83	1.11
P46013	8	T	GFKELFQTPGHTEEA	P46013	MKI67	Q00526	CDK3	String	CMGC/CDK/CDC2	2.52	1.58
P46013	8	T	GFKELFQTPGHTEEA	P46013	MKI67	P06493	CDC2	Exp.&String	CMGC/CDK/CDC2	2.52	1.58
P46013	8	T	GFKELFQTPGHTEEA	P46013	MKI67	P24941	CDK2	String	CMGC/CDK/CDC2	2.52	1.58
P46013	8	T	GFKELFQTPGHTEEA	P46013	MKI67	P42345	FRAP	String	Atypical/PIKK/FRAP	3.93	2.79
P46013	8	S	TTKIACKSPQPDPVD	P46013	MKI67	Q9BWU1	CDK11	String	CMGC/CDK	2.05	1.11
P46013	8	S	TTKIACKSPQPDPVD	P46013	MKI67	P21127	PITSLRE	String	CMGC/CDK	2.05	1.11
P46013	8	S	TTKIACKSPQPDPVD	P46013	MKI67	Q15131	CDK10	String	CMGC/CDK	2.05	1.11
P46013	8	S	TTKIACKSPQPDPVD	P46013	MKI67	P49336	CDK8	String	CMGC/CDK	2.05	1.11
P46013	8	S	TTKIACKSPQPDPVD	P46013	MKI67	P50750	CDK9	String	CMGC/CDK	2.05	1.11
P46013	8	S	TTKIACKSPQPDPVD	P46013	MKI67	Q8IZL9	CCRK	String	CMGC/CDK	2.05	1.11
P46013	8	S	TTKIACKSPQPDPVD	P46013	MKI67	B4DK03	PCTAIRE3	String	CMGC/CDK	2.05	1.11
P46013	8	S	TTKIACKSPQPDPVD	P46013	MKI67	P50613	CDK7	String	CMGC/CDK	2.05	1.11
P46013	8	S	TTKIACKSPQPDPVD	P46013	MKI67	Q14004	CHED	String	CMGC/CDK	2.05	1.11
P46013	8	S	TTKIACKSPQPDPVD	P46013	MKI67	Q96Q40	PFTAIRE2	String	CMGC/CDK	2.05	1.11
P46013	8	S	TTKIACKSPQPDPVD	P46013	MKI67	Q9NYV4	CRK7	String	CMGC/CDK	2.05	1.11
P46013	8	S	TTKIACKSPQPDPVD	P46013	MKI67	P11802	CDK4	String	CMGC/CDK	2.05	1.11
P46013	8	S	TTKIACKSPQPDPVD	P46013	MKI67	Q00537	PCTAIRE2	String	CMGC/CDK	2.05	1.11
P46013	8	S	TTKIACKSPQPDPVD	P46013	MKI67	Q00536	PCTAIRE1	String	CMGC/CDK	2.05	1.11
P46013	8	S	TTKIACKSPQPDPVD	P46013	MKI67	Q00535	CDK5	String	CMGC/CDK	2.05	1.11
P46013	8	S	TTKIACKSPQPDPVD	P46013	MKI67	Q00534	CDK6	String	CMGC/CDK	2.05	1.11
P46013	8	S	TTKIACKSPQPDPVD	P46013	MKI67	O94921	PFTAIRE1	String	CMGC/CDK	2.05	1.11
P46013	8	S	TTKIACKSPQPDPVD	P46013	MKI67	P36894	BMPR1A	String	TKL/STKR	2.33	2.12
P46013	8	S	TTKIACKSPQPDPVD	P46013	MKI67	P36897	TGFbR1	String	TKL/STKR	2.33	2.12
P46013	8	S	TTKIACKSPQPDPVD	P46013	MKI67	Q16671	MISR2	String	TKL/STKR	2.33	2.12
P46013	8	S	TTKIACKSPQPDPVD	P46013	MKI67	P36896	ALK4	String	TKL/STKR	2.33	2.12
P46013	8	S	TTKIACKSPQPDPVD	P46013	MKI67	P37023	ALK1	String	TKL/STKR	2.33	2.12
P46013	8	S	TTKIACKSPQPDPVD	P46013	MKI67	Q04771	ALK2	String	TKL/STKR	2.33	2.12
P46013	8	S	TTKIACKSPQPDPVD	P46013	MKI67	B4DSV1	BMPR1B	String	TKL/STKR	2.33	2.12
P46013	8	S	TTKIACKSPQPDPVD	P46013	MKI67	D2JYI1	TGFbR2	String	TKL/STKR	2.33	2.12
P46013	8	S	TTKIACKSPQPDPVD	P46013	MKI67	Q13705	ACTR2B	String	TKL/STKR	2.33	2.12
P46013	8	S	TTKIACKSPQPDPVD	P46013	MKI67	Q13873	BMPR2	String	TKL/STKR	2.33	2.12
P46013	8	S	TTKIACKSPQPDPVD	P46013	MKI67	Q8NER5	ALK7	String	TKL/STKR	2.33	2.12
P46013	8	S	TTKIACKSPQPDPVD	P46013	MKI67	P27037	ACTR2	String	TKL/STKR	2.33	2.12
P46013	8	S	TTKIACKSPQPDPVD	P46013	MKI67	Q00526	CDK3	String	CMGC/CDK/CDC2	2.95	1.58
P46013	8	S	TTKIACKSPQPDPVD	P46013	MKI67	P06493	CDC2	Exp.&String	CMGC/CDK/CDC2	2.95	1.58
P46013	8	S	TTKIACKSPQPDPVD	P46013	MKI67	P24941	CDK2	String	CMGC/CDK/CDC2	2.95	1.58
P46013	8	S	TTKIACKSPQPDPVD	P46013	MKI67	P42345	FRAP	String	Atypical/PIKK/FRAP	4.6	2.79
P46013	8	S	TKKILCKSPQSDPAD	P46013	MKI67	Q9BWU1	CDK11	String	CMGC/CDK	2.65	1.11
P46013	8	S	TKKILCKSPQSDPAD	P46013	MKI67	P21127	PITSLRE	String	CMGC/CDK	2.65	1.11
P46013	8	S	TKKILCKSPQSDPAD	P46013	MKI67	Q15131	CDK10	String	CMGC/CDK	2.65	1.11
P46013	8	S	TKKILCKSPQSDPAD	P46013	MKI67	P49336	CDK8	String	CMGC/CDK	2.65	1.11
P46013	8	S	TKKILCKSPQSDPAD	P46013	MKI67	P50750	CDK9	String	CMGC/CDK	2.65	1.11
P46013	8	S	TKKILCKSPQSDPAD	P46013	MKI67	Q8IZL9	CCRK	String	CMGC/CDK	2.65	1.11
P46013	8	S	TKKILCKSPQSDPAD	P46013	MKI67	B4DK03	PCTAIRE3	String	CMGC/CDK	2.65	1.11
P46013	8	S	TKKILCKSPQSDPAD	P46013	MKI67	P50613	CDK7	String	CMGC/CDK	2.65	1.11
P46013	8	S	TKKILCKSPQSDPAD	P46013	MKI67	Q14004	CHED	String	CMGC/CDK	2.65	1.11
P46013	8	S	TKKILCKSPQSDPAD	P46013	MKI67	Q96Q40	PFTAIRE2	String	CMGC/CDK	2.65	1.11
P46013	8	S	TKKILCKSPQSDPAD	P46013	MKI67	Q9NYV4	CRK7	String	CMGC/CDK	2.65	1.11
P46013	8	S	TKKILCKSPQSDPAD	P46013	MKI67	P11802	CDK4	String	CMGC/CDK	2.65	1.11
P46013	8	S	TKKILCKSPQSDPAD	P46013	MKI67	Q00537	PCTAIRE2	String	CMGC/CDK	2.65	1.11
P46013	8	S	TKKILCKSPQSDPAD	P46013	MKI67	Q00536	PCTAIRE1	String	CMGC/CDK	2.65	1.11
P46013	8	S	TKKILCKSPQSDPAD	P46013	MKI67	Q00535	CDK5	String	CMGC/CDK	2.65	1.11
P46013	8	S	TKKILCKSPQSDPAD	P46013	MKI67	Q00534	CDK6	String	CMGC/CDK	2.65	1.11
P46013	8	S	TKKILCKSPQSDPAD	P46013	MKI67	O94921	PFTAIRE1	String	CMGC/CDK	2.65	1.11
P46013	8	S	TKKILCKSPQSDPAD	P46013	MKI67	Q00526	CDK3	String	CMGC/CDK/CDC2	3.65	1.58
P46013	8	S	TKKILCKSPQSDPAD	P46013	MKI67	P06493	CDC2	Exp.&String	CMGC/CDK/CDC2	3.65	1.58
P46013	8	S	TKKILCKSPQSDPAD	P46013	MKI67	P24941	CDK2	String	CMGC/CDK/CDC2	3.65	1.58
P46013	8	S	TKKILCKSPQSDPAD	P46013	MKI67	P42345	FRAP	String	Atypical/PIKK/FRAP	5.47	2.79
P46013	8	S	TTKIACRSPQPDPVG	P46013	MKI67	Q9BWU1	CDK11	String	CMGC/CDK	1.73	1.11
P46013	8	S	TTKIACRSPQPDPVG	P46013	MKI67	P21127	PITSLRE	String	CMGC/CDK	1.73	1.11
P46013	8	S	TTKIACRSPQPDPVG	P46013	MKI67	Q15131	CDK10	String	CMGC/CDK	1.73	1.11
P46013	8	S	TTKIACRSPQPDPVG	P46013	MKI67	P49336	CDK8	String	CMGC/CDK	1.73	1.11
P46013	8	S	TTKIACRSPQPDPVG	P46013	MKI67	P50750	CDK9	String	CMGC/CDK	1.73	1.11
P46013	8	S	TTKIACRSPQPDPVG	P46013	MKI67	Q8IZL9	CCRK	String	CMGC/CDK	1.73	1.11
P46013	8	S	TTKIACRSPQPDPVG	P46013	MKI67	B4DK03	PCTAIRE3	String	CMGC/CDK	1.73	1.11
P46013	8	S	TTKIACRSPQPDPVG	P46013	MKI67	P50613	CDK7	String	CMGC/CDK	1.73	1.11
P46013	8	S	TTKIACRSPQPDPVG	P46013	MKI67	Q14004	CHED	String	CMGC/CDK	1.73	1.11
P46013	8	S	TTKIACRSPQPDPVG	P46013	MKI67	Q96Q40	PFTAIRE2	String	CMGC/CDK	1.73	1.11
P46013	8	S	TTKIACRSPQPDPVG	P46013	MKI67	Q9NYV4	CRK7	String	CMGC/CDK	1.73	1.11
P46013	8	S	TTKIACRSPQPDPVG	P46013	MKI67	P11802	CDK4	String	CMGC/CDK	1.73	1.11
P46013	8	S	TTKIACRSPQPDPVG	P46013	MKI67	Q00537	PCTAIRE2	String	CMGC/CDK	1.73	1.11
P46013	8	S	TTKIACRSPQPDPVG	P46013	MKI67	Q00536	PCTAIRE1	String	CMGC/CDK	1.73	1.11
P46013	8	S	TTKIACRSPQPDPVG	P46013	MKI67	Q00535	CDK5	String	CMGC/CDK	1.73	1.11
P46013	8	S	TTKIACRSPQPDPVG	P46013	MKI67	Q00534	CDK6	String	CMGC/CDK	1.73	1.11
P46013	8	S	TTKIACRSPQPDPVG	P46013	MKI67	O94921	PFTAIRE1	String	CMGC/CDK	1.73	1.11
P46013	8	S	TTKIACRSPQPDPVG	P46013	MKI67	Q00526	CDK3	String	CMGC/CDK/CDC2	2.45	1.58
P46013	8	S	TTKIACRSPQPDPVG	P46013	MKI67	P06493	CDC2	Exp.&String	CMGC/CDK/CDC2	2.45	1.58
P46013	8	S	TTKIACRSPQPDPVG	P46013	MKI67	P24941	CDK2	String	CMGC/CDK/CDC2	2.45	1.58
P46013	8	S	TTKIACRSPQPDPVG	P46013	MKI67	P42345	FRAP	String	Atypical/PIKK/FRAP	4.6	2.79
P46013	8	S	ATKIPCESPPLEVVD	P46013	MKI67	Q9BWU1	CDK11	String	CMGC/CDK	1.38	1.11
P46013	8	S	ATKIPCESPPLEVVD	P46013	MKI67	P21127	PITSLRE	String	CMGC/CDK	1.38	1.11
P46013	8	S	ATKIPCESPPLEVVD	P46013	MKI67	Q15131	CDK10	String	CMGC/CDK	1.38	1.11
P46013	8	S	ATKIPCESPPLEVVD	P46013	MKI67	P49336	CDK8	String	CMGC/CDK	1.38	1.11
P46013	8	S	ATKIPCESPPLEVVD	P46013	MKI67	P50750	CDK9	String	CMGC/CDK	1.38	1.11
P46013	8	S	ATKIPCESPPLEVVD	P46013	MKI67	Q8IZL9	CCRK	String	CMGC/CDK	1.38	1.11
P46013	8	S	ATKIPCESPPLEVVD	P46013	MKI67	B4DK03	PCTAIRE3	String	CMGC/CDK	1.38	1.11
P46013	8	S	ATKIPCESPPLEVVD	P46013	MKI67	P50613	CDK7	String	CMGC/CDK	1.38	1.11
P46013	8	S	ATKIPCESPPLEVVD	P46013	MKI67	Q14004	CHED	String	CMGC/CDK	1.38	1.11
P46013	8	S	ATKIPCESPPLEVVD	P46013	MKI67	Q96Q40	PFTAIRE2	String	CMGC/CDK	1.38	1.11
P46013	8	S	ATKIPCESPPLEVVD	P46013	MKI67	Q9NYV4	CRK7	String	CMGC/CDK	1.38	1.11
P46013	8	S	ATKIPCESPPLEVVD	P46013	MKI67	P11802	CDK4	String	CMGC/CDK	1.38	1.11
P46013	8	S	ATKIPCESPPLEVVD	P46013	MKI67	Q00537	PCTAIRE2	String	CMGC/CDK	1.38	1.11
P46013	8	S	ATKIPCESPPLEVVD	P46013	MKI67	Q00536	PCTAIRE1	String	CMGC/CDK	1.38	1.11
P46013	8	S	ATKIPCESPPLEVVD	P46013	MKI67	Q00535	CDK5	String	CMGC/CDK	1.38	1.11
P46013	8	S	ATKIPCESPPLEVVD	P46013	MKI67	Q00534	CDK6	String	CMGC/CDK	1.38	1.11
P46013	8	S	ATKIPCESPPLEVVD	P46013	MKI67	O94921	PFTAIRE1	String	CMGC/CDK	1.38	1.11
P46013	8	S	ATKIPCESPPLEVVD	P46013	MKI67	Q00526	CDK3	String	CMGC/CDK/CDC2	2.23	1.58
P46013	8	S	ATKIPCESPPLEVVD	P46013	MKI67	P06493	CDC2	Exp.&String	CMGC/CDK/CDC2	2.23	1.58
P46013	8	S	ATKIPCESPPLEVVD	P46013	MKI67	P24941	CDK2	String	CMGC/CDK/CDC2	2.23	1.58
P46013	8	S	ATKIPCESPPLEVVD	P46013	MKI67	P42345	FRAP	String	Atypical/PIKK/FRAP	3.47	2.79
P46013	8	S	NTKIPCKSPPPELTD	P46013	MKI67	Q9BWU1	CDK11	String	CMGC/CDK	1.96	1.11
P46013	8	S	NTKIPCKSPPPELTD	P46013	MKI67	P21127	PITSLRE	String	CMGC/CDK	1.96	1.11
P46013	8	S	NTKIPCKSPPPELTD	P46013	MKI67	Q15131	CDK10	String	CMGC/CDK	1.96	1.11
P46013	8	S	NTKIPCKSPPPELTD	P46013	MKI67	P49336	CDK8	String	CMGC/CDK	1.96	1.11
P46013	8	S	NTKIPCKSPPPELTD	P46013	MKI67	P50750	CDK9	String	CMGC/CDK	1.96	1.11
P46013	8	S	NTKIPCKSPPPELTD	P46013	MKI67	Q8IZL9	CCRK	String	CMGC/CDK	1.96	1.11
P46013	8	S	NTKIPCKSPPPELTD	P46013	MKI67	B4DK03	PCTAIRE3	String	CMGC/CDK	1.96	1.11
P46013	8	S	NTKIPCKSPPPELTD	P46013	MKI67	P50613	CDK7	String	CMGC/CDK	1.96	1.11
P46013	8	S	NTKIPCKSPPPELTD	P46013	MKI67	Q14004	CHED	String	CMGC/CDK	1.96	1.11
P46013	8	S	NTKIPCKSPPPELTD	P46013	MKI67	Q96Q40	PFTAIRE2	String	CMGC/CDK	1.96	1.11
P46013	8	S	NTKIPCKSPPPELTD	P46013	MKI67	Q9NYV4	CRK7	String	CMGC/CDK	1.96	1.11
P46013	8	S	NTKIPCKSPPPELTD	P46013	MKI67	P11802	CDK4	String	CMGC/CDK	1.96	1.11
P46013	8	S	NTKIPCKSPPPELTD	P46013	MKI67	Q00537	PCTAIRE2	String	CMGC/CDK	1.96	1.11
P46013	8	S	NTKIPCKSPPPELTD	P46013	MKI67	Q00536	PCTAIRE1	String	CMGC/CDK	1.96	1.11
P46013	8	S	NTKIPCKSPPPELTD	P46013	MKI67	Q00535	CDK5	String	CMGC/CDK	1.96	1.11
P46013	8	S	NTKIPCKSPPPELTD	P46013	MKI67	Q00534	CDK6	String	CMGC/CDK	1.96	1.11
P46013	8	S	NTKIPCKSPPPELTD	P46013	MKI67	O94921	PFTAIRE1	String	CMGC/CDK	1.96	1.11
P46013	8	S	NTKIPCKSPPPELTD	P46013	MKI67	P36894	BMPR1A	String	TKL/STKR	2.33	2.12
P46013	8	S	NTKIPCKSPPPELTD	P46013	MKI67	P36897	TGFbR1	String	TKL/STKR	2.33	2.12
P46013	8	S	NTKIPCKSPPPELTD	P46013	MKI67	Q16671	MISR2	String	TKL/STKR	2.33	2.12
P46013	8	S	NTKIPCKSPPPELTD	P46013	MKI67	P36896	ALK4	String	TKL/STKR	2.33	2.12
P46013	8	S	NTKIPCKSPPPELTD	P46013	MKI67	P37023	ALK1	String	TKL/STKR	2.33	2.12
P46013	8	S	NTKIPCKSPPPELTD	P46013	MKI67	Q04771	ALK2	String	TKL/STKR	2.33	2.12
P46013	8	S	NTKIPCKSPPPELTD	P46013	MKI67	B4DSV1	BMPR1B	String	TKL/STKR	2.33	2.12
P46013	8	S	NTKIPCKSPPPELTD	P46013	MKI67	D2JYI1	TGFbR2	String	TKL/STKR	2.33	2.12
P46013	8	S	NTKIPCKSPPPELTD	P46013	MKI67	Q13705	ACTR2B	String	TKL/STKR	2.33	2.12
P46013	8	S	NTKIPCKSPPPELTD	P46013	MKI67	Q13873	BMPR2	String	TKL/STKR	2.33	2.12
P46013	8	S	NTKIPCKSPPPELTD	P46013	MKI67	Q8NER5	ALK7	String	TKL/STKR	2.33	2.12
P46013	8	S	NTKIPCKSPPPELTD	P46013	MKI67	P27037	ACTR2	String	TKL/STKR	2.33	2.12
P46013	8	S	NTKIPCKSPPPELTD	P46013	MKI67	Q00526	CDK3	String	CMGC/CDK/CDC2	3.05	1.58
P46013	8	S	NTKIPCKSPPPELTD	P46013	MKI67	P06493	CDC2	Exp.&String	CMGC/CDK/CDC2	3.05	1.58
P46013	8	S	NTKIPCKSPPPELTD	P46013	MKI67	P24941	CDK2	String	CMGC/CDK/CDC2	3.05	1.58
P46013	8	S	NTKIPCKSPPPELTD	P46013	MKI67	P42345	FRAP	String	Atypical/PIKK/FRAP	4.6	2.79
P46013	8	S	NTKIPCKSPPPELTD	P46013	MKI67	O14965	AurA	String	Other/AUR/AUR-A	2	1.71
P46013	8	S	ITEVSCKSPQPESFK	P46013	MKI67	Q9BWU1	CDK11	String	CMGC/CDK	2.26	1.11
P46013	8	S	ITEVSCKSPQPESFK	P46013	MKI67	P21127	PITSLRE	String	CMGC/CDK	2.26	1.11
P46013	8	S	ITEVSCKSPQPESFK	P46013	MKI67	Q15131	CDK10	String	CMGC/CDK	2.26	1.11
P46013	8	S	ITEVSCKSPQPESFK	P46013	MKI67	P49336	CDK8	String	CMGC/CDK	2.26	1.11
P46013	8	S	ITEVSCKSPQPESFK	P46013	MKI67	P50750	CDK9	String	CMGC/CDK	2.26	1.11
P46013	8	S	ITEVSCKSPQPESFK	P46013	MKI67	Q8IZL9	CCRK	String	CMGC/CDK	2.26	1.11
P46013	8	S	ITEVSCKSPQPESFK	P46013	MKI67	B4DK03	PCTAIRE3	String	CMGC/CDK	2.26	1.11
P46013	8	S	ITEVSCKSPQPESFK	P46013	MKI67	P50613	CDK7	String	CMGC/CDK	2.26	1.11
P46013	8	S	ITEVSCKSPQPESFK	P46013	MKI67	Q14004	CHED	String	CMGC/CDK	2.26	1.11
P46013	8	S	ITEVSCKSPQPESFK	P46013	MKI67	Q96Q40	PFTAIRE2	String	CMGC/CDK	2.26	1.11
P46013	8	S	ITEVSCKSPQPESFK	P46013	MKI67	Q9NYV4	CRK7	String	CMGC/CDK	2.26	1.11
P46013	8	S	ITEVSCKSPQPESFK	P46013	MKI67	P11802	CDK4	String	CMGC/CDK	2.26	1.11
P46013	8	S	ITEVSCKSPQPESFK	P46013	MKI67	Q00537	PCTAIRE2	String	CMGC/CDK	2.26	1.11
P46013	8	S	ITEVSCKSPQPESFK	P46013	MKI67	Q00536	PCTAIRE1	String	CMGC/CDK	2.26	1.11
P46013	8	S	ITEVSCKSPQPESFK	P46013	MKI67	Q00535	CDK5	String	CMGC/CDK	2.26	1.11
P46013	8	S	ITEVSCKSPQPESFK	P46013	MKI67	Q00534	CDK6	String	CMGC/CDK	2.26	1.11
P46013	8	S	ITEVSCKSPQPESFK	P46013	MKI67	O94921	PFTAIRE1	String	CMGC/CDK	2.26	1.11
P46013	8	S	ITEVSCKSPQPESFK	P46013	MKI67	Q00526	CDK3	String	CMGC/CDK/CDC2	2.85	1.58
P46013	8	S	ITEVSCKSPQPESFK	P46013	MKI67	P06493	CDC2	Exp.&String	CMGC/CDK/CDC2	2.85	1.58
P46013	8	S	ITEVSCKSPQPESFK	P46013	MKI67	P24941	CDK2	String	CMGC/CDK/CDC2	2.85	1.58
P46013	8	S	ITEVSCKSPQPESFK	P46013	MKI67	O14965	AurA	String	Other/AUR/AUR-A	1.86	1.71
H0Y4L1	8	S	LQEDPNYSPQRFPNA	B0UX83	BAT3	P11802	CDK4	String	CMGC/CDK	2.14	1.11
H0Y4L1	8	S	LQEDPNYSPQRFPNA	B0UX83	BAT3	Q00537	PCTAIRE2	String	CMGC/CDK	2.14	1.11
H0Y4L1	8	S	LQEDPNYSPQRFPNA	B0UX83	BAT3	Q00536	PCTAIRE1	String	CMGC/CDK	2.14	1.11
H0Y4L1	8	S	LQEDPNYSPQRFPNA	B0UX83	BAT3	Q00535	CDK5	String	CMGC/CDK	2.14	1.11
H0Y4L1	8	S	LQEDPNYSPQRFPNA	B0UX83	BAT3	Q00534	CDK6	String	CMGC/CDK	2.14	1.11
H0Y4L1	8	S	LQEDPNYSPQRFPNA	B0UX83	BAT3	O94921	PFTAIRE1	String	CMGC/CDK	2.14	1.11
H0Y4L1	8	S	LQEDPNYSPQRFPNA	B0UX83	BAT3	P42345	FRAP	String	Atypical/PIKK/FRAP	4.6	2.79
D6RGF8	8	S	MGLLSQGSPLSWEET	P48506	GCLC	P27361	Erk1	String	CMGC/MAPK	1.32	1.17
D6RGF8	8	S	MGLLSQGSPLSWEET	P48506	GCLC	Q13164	Erk5	String	CMGC/MAPK	1.32	1.17
D6RGF8	8	S	MGLLSQGSPLSWEET	P48506	GCLC	Q16659	Erk3	String	CMGC/MAPK	1.32	1.17
D6RGF8	8	S	MGLLSQGSPLSWEET	P48506	GCLC	A8MTD8	JNK3	String	CMGC/MAPK	1.32	1.17
D6RGF8	8	S	MGLLSQGSPLSWEET	P48506	GCLC	D3DX92	JNK1	String	CMGC/MAPK	1.32	1.17
D6RGF8	8	S	MGLLSQGSPLSWEET	P48506	GCLC	Q15759	p38b	String	CMGC/MAPK	1.32	1.17
D6RGF8	8	S	MGLLSQGSPLSWEET	P48506	GCLC	P45984	JNK2	String	CMGC/MAPK	1.32	1.17
D6RGF8	8	S	MGLLSQGSPLSWEET	P48506	GCLC	P28482	Erk2	String	CMGC/MAPK	1.32	1.17
D6RGF8	8	S	MGLLSQGSPLSWEET	P48506	GCLC	Q16539	p38a	String	CMGC/MAPK	1.32	1.17
D6RGF8	8	S	MGLLSQGSPLSWEET	P48506	GCLC	O15264	p38d	String	CMGC/MAPK	1.32	1.17
H7BYT1	8	S	PTPLTPTSHTANTSP	P48730	CK1d	P49760	CLK2	String	CMGC	1.73	1.46
H7BYT1	8	S	PTPLTPTSHTANTSP	P48730	CK1d	B4DFW7	CLK1	String	CMGC	1.73	1.46
H7BYT1	8	S	PTPLTPTSHTANTSP	P48730	CK1d	Q2NME9	CDKL4	String	CMGC	1.73	1.46
H7BYT1	8	S	PTPLTPTSHTANTSP	P48730	CK1d	Q9UPE1	MSSK1	String	CMGC	1.73	1.46
H7BYT1	8	S	PTPLTPTSHTANTSP	P48730	CK1d	Q00532	CDKL1	String	CMGC	1.73	1.46
H7BYT1	8	S	PTPLTPTSHTANTSP	P48730	CK1d	Q9UPZ9	ICK	String	CMGC	1.73	1.46
H7BYT1	8	S	PTPLTPTSHTANTSP	P48730	CK1d	P28482	Erk2	String	CMGC/MAPK	1.29	1.17
H7BYT1	8	S	PTPLTPTSHTANTSP	P48730	CK1d	Q16539	p38a	String	CMGC/MAPK	1.29	1.17
H7BYT1	8	S	PTPLTPTSHTANTSP	P48730	CK1d	O15264	p38d	String	CMGC/MAPK	1.29	1.17
H7BYT1	8	S	PTPLTPTSHTANTSP	P48730	CK1d	P36897	TGFbR1	Exp.	TKL/STKR	3.11	2.12
H7BYT1	8	S	PTPLTPTSHTANTSP	P48730	CK1d	Q16671	MISR2	Exp.	TKL/STKR	3.11	2.12
H7BYT1	8	S	PTPLTPTSHTANTSP	P48730	CK1d	P36896	ALK4	Exp.	TKL/STKR	3.11	2.12
H7BYT1	8	S	PTPLTPTSHTANTSP	P48730	CK1d	P37023	ALK1	Exp.	TKL/STKR	3.11	2.12
H7BYT1	8	S	PTPLTPTSHTANTSP	P48730	CK1d	Q04771	ALK2	Exp.	TKL/STKR	3.11	2.12
H7BYT1	8	S	PTPLTPTSHTANTSP	P48730	CK1d	B4DSV1	BMPR1B	Exp.	TKL/STKR	3.11	2.12
H7BYT1	8	S	PTPLTPTSHTANTSP	P48730	CK1d	D2JYI1	TGFbR2	Exp.	TKL/STKR	3.11	2.12
H7BYT1	8	S	PTPLTPTSHTANTSP	P48730	CK1d	Q13705	ACTR2B	Exp.	TKL/STKR	3.11	2.12
H7BYT1	8	S	PTPLTPTSHTANTSP	P48730	CK1d	Q13873	BMPR2	Exp.	TKL/STKR	3.11	2.12
H7BYT1	8	S	PTPLTPTSHTANTSP	P48730	CK1d	Q8NER5	ALK7	Exp.	TKL/STKR	3.11	2.12
H7BYT1	8	S	PTPLTPTSHTANTSP	P48730	CK1d	P27037	ACTR2	Exp.	TKL/STKR	3.11	2.12
H7BYT1	8	S	PTPLTPTSHTANTSP	P48730	CK1d	P06493	CDC2	String	CMGC/CDK/CDC2	1.65	1.58
H7BYT1	8	S	PTPLTPTSHTANTSP	P48730	CK1d	P24941	CDK2	String	CMGC/CDK/CDC2	1.65	1.58
P49006	8	S	PFKLSGLSFKRNRKE	P49006	MARCKSL1	P41743	PKCi	String	AGC/PKC	3.51	2.36
P49006	8	S	PFKLSGLSFKRNRKE	P49006	MARCKSL1	Q04759	PKCt	String	AGC/PKC	3.51	2.36
P49006	8	S	PFKLSGLSFKRNRKE	P49006	MARCKSL1	D3DWF5	PKCb	String	AGC/PKC	3.51	2.36
P49006	8	S	PFKLSGLSFKRNRKE	P49006	MARCKSL1	P17252	PKCa	String	AGC/PKC	3.51	2.36
P49006	8	S	PFKLSGLSFKRNRKE	P49006	MARCKSL1	P05129	PKCg	String	AGC/PKC	3.51	2.36
P49006	8	S	PFKLSGLSFKRNRKE	P49006	MARCKSL1	Q05655	PKCd	String	AGC/PKC	3.51	2.36
P49006	8	S	PFKLSGLSFKRNRKE	P49006	MARCKSL1	P24723	PKCh	String	AGC/PKC	3.51	2.36
P49006	8	S	PFKLSGLSFKRNRKE	P49006	MARCKSL1	Q02156	PKCe	String	AGC/PKC	3.51	2.36
P49006	8	S	PFKLSGLSFKRNRKE	P49006	MARCKSL1	Q05513	PKCz	String	AGC/PKC	3.51	2.36
P49006	8	S	PFKLSGLSFKRNRKE	P49006	MARCKSL1	B2RDI6	MLK3	String	TKL/MLK	2.56	1.58
P49006	8	S	PFKLSGLSFKRNRKE	P49006	MARCKSL1	Q02779	MLK2	String	TKL/MLK	2.56	1.58
P49006	8	S	PFKLSGLSFKRNRKE	P49006	MARCKSL1	O43283	LZK	String	TKL/MLK	2.56	1.58
P49006	8	S	PFKLSGLSFKRNRKE	P49006	MARCKSL1	Q13418	ILK	String	TKL/MLK	2.56	1.58
P49006	8	S	PFKLSGLSFKRNRKE	P49006	MARCKSL1	Q12852	DLK	String	TKL/MLK	2.56	1.58
P49006	8	S	PFKLSGLSFKRNRKE	P49006	MARCKSL1	Q59H18	HH498	String	TKL/MLK	2.56	1.58
P49006	8	S	PFKLSGLSFKRNRKE	P49006	MARCKSL1	B8ZZU2	ZAK	String	TKL/MLK	2.56	1.58
P49006	8	S	PFKLSGLSFKRNRKE	P49006	MARCKSL1	P80192	MLK1	String	TKL/MLK	2.56	1.58
P49327	8	S	PRGTPLISPLIKWDH	P49327	FASN	P27361	Erk1	String	CMGC/MAPK	1.22	1.17
P49327	8	S	PRGTPLISPLIKWDH	P49327	FASN	Q13164	Erk5	String	CMGC/MAPK	1.22	1.17
P49327	8	S	PRGTPLISPLIKWDH	P49327	FASN	Q16659	Erk3	String	CMGC/MAPK	1.22	1.17
P49327	8	S	PRGTPLISPLIKWDH	P49327	FASN	A8MTD8	JNK3	String	CMGC/MAPK	1.22	1.17
P49327	8	S	PRGTPLISPLIKWDH	P49327	FASN	D3DX92	JNK1	String	CMGC/MAPK	1.22	1.17
P49327	8	S	PRGTPLISPLIKWDH	P49327	FASN	Q15759	p38b	String	CMGC/MAPK	1.22	1.17
P49327	8	S	PRGTPLISPLIKWDH	P49327	FASN	P45984	JNK2	String	CMGC/MAPK	1.22	1.17
P49327	8	S	PRGTPLISPLIKWDH	P49327	FASN	P28482	Erk2	String	CMGC/MAPK	1.22	1.17
P49327	8	S	PRGTPLISPLIKWDH	P49327	FASN	Q16539	p38a	String	CMGC/MAPK	1.22	1.17
P49327	8	S	PRGTPLISPLIKWDH	P49327	FASN	O15264	p38d	String	CMGC/MAPK	1.22	1.17
P49327	8	S	RLFDHPESPTPNPTE	P49327	FASN	P27361	Erk1	String	CMGC/MAPK	3.02	1.17
P49327	8	S	RLFDHPESPTPNPTE	P49327	FASN	Q13164	Erk5	String	CMGC/MAPK	3.02	1.17
P49327	8	S	RLFDHPESPTPNPTE	P49327	FASN	Q16659	Erk3	String	CMGC/MAPK	3.02	1.17
P49327	8	S	RLFDHPESPTPNPTE	P49327	FASN	A8MTD8	JNK3	String	CMGC/MAPK	3.02	1.17
P49327	8	S	RLFDHPESPTPNPTE	P49327	FASN	D3DX92	JNK1	String	CMGC/MAPK	3.02	1.17
P49327	8	S	RLFDHPESPTPNPTE	P49327	FASN	Q15759	p38b	String	CMGC/MAPK	3.02	1.17
P49327	8	S	RLFDHPESPTPNPTE	P49327	FASN	P45984	JNK2	String	CMGC/MAPK	3.02	1.17
P49327	8	S	RLFDHPESPTPNPTE	P49327	FASN	P28482	Erk2	String	CMGC/MAPK	3.02	1.17
P49327	8	S	RLFDHPESPTPNPTE	P49327	FASN	Q16539	p38a	String	CMGC/MAPK	3.02	1.17
P49327	8	S	RLFDHPESPTPNPTE	P49327	FASN	O15264	p38d	String	CMGC/MAPK	3.02	1.17
P49327	8	S	RLFDHPESPTPNPTE	P49327	FASN	O14920	IKKb	String	Other/IKK	1.14	1.14
P49327	8	S	RLFDHPESPTPNPTE	P49327	FASN	Q14164	IKKe	String	Other/IKK	1.14	1.14
P49327	8	S	RLFDHPESPTPNPTE	P49327	FASN	O15111	IKKa	String	Other/IKK	1.14	1.14
P49327	8	S	RLFDHPESPTPNPTE	P49327	FASN	Q9P2K8	GCN2	String	Other/PEK	2.31	1.82
P49327	8	S	RLFDHPESPTPNPTE	P49327	FASN	P19525	PKR	String	Other/PEK	2.31	1.82
P49327	8	S	RLFDHPESPTPNPTE	P49327	FASN	B2RCU9	PEK	String	Other/PEK	2.31	1.82
P49327	8	S	RLFDHPESPTPNPTE	P49327	FASN	P42345	FRAP	String	Atypical/PIKK/FRAP	3.67	2.79
F8VS02	8	S	WKQYMRRSTCTINYS	P49419	ALDH7A1	P22612	PKACg	String	AGC/PKA	1.87	1.81
F8VS02	8	S	WKQYMRRSTCTINYS	P49419	ALDH7A1	P17612	PKACa	String	AGC/PKA	1.87	1.81
F8VS02	8	S	WKQYMRRSTCTINYS	P49419	ALDH7A1	P51817	PRKX	String	AGC/PKA	1.87	1.81
F8VS02	8	S	WKQYMRRSTCTINYS	P49419	ALDH7A1	P22694	PKACb	String	AGC/PKA	1.87	1.81
P49454	8	T	KIFTTPLTPSQYYSG	P49454	CENPF	P06493	CDC2	String	CMGC/CDK/CDC2	2.84	1.58
P49454	8	T	KIFTTPLTPSQYYSG	P49454	CENPF	P24941	CDK2	String	CMGC/CDK/CDC2	2.84	1.58
C9J013	8	S	RTDALTSSPGRDLPP	P49736	MCM2	P11802	CDK4	Exp.&String	CMGC/CDK	2.96	1.11
C9J013	8	S	RTDALTSSPGRDLPP	P49736	MCM2	Q00537	PCTAIRE2	Exp.&String	CMGC/CDK	2.96	1.11
C9J013	8	S	RTDALTSSPGRDLPP	P49736	MCM2	Q00536	PCTAIRE1	Exp.&String	CMGC/CDK	2.96	1.11
C9J013	8	S	RTDALTSSPGRDLPP	P49736	MCM2	Q00535	CDK5	Exp.&String	CMGC/CDK	2.96	1.11
C9J013	8	S	RTDALTSSPGRDLPP	P49736	MCM2	Q00534	CDK6	Exp.&String	CMGC/CDK	2.96	1.11
C9J013	8	S	RTDALTSSPGRDLPP	P49736	MCM2	O94921	PFTAIRE1	Exp.&String	CMGC/CDK	2.96	1.11
C9J013	8	S	RTDALTSSPGRDLPP	P49736	MCM2	P24941	CDK2	String	CMGC/CDK/CDC2	4.7	1.58
F6QR24	8	S	TSLPPLWSPEAERSH	P49790	NUP153	P28482	Erk2	String	CMGC/MAPK	1.82	1.17
F6QR24	8	S	TSLPPLWSPEAERSH	P49790	NUP153	Q16539	p38a	Exp.&String	CMGC/MAPK	1.82	1.17
F6QR24	8	S	TSLPPLWSPEAERSH	P49790	NUP153	O15264	p38d	Exp.&String	CMGC/MAPK	1.82	1.17
F6QR24	8	S	TSLPPLWSPEAERSH	P49790	NUP153	P06493	CDC2	String	CMGC/CDK/CDC2	2.94	1.58
F6QR24	8	S	TSLPPLWSPEAERSH	P49790	NUP153	P24941	CDK2	String	CMGC/CDK/CDC2	2.94	1.58
A6NKT7	8	Y	FYFAKLYYEAKEYDL	P49792	RANBP2	Q9UM73	ALK	String	TK/Alk	3	1.73
A6NKT7	8	Y	FYFAKLYYEAKEYDL	P49792	RANBP2	P29376	LTK	String	TK/Alk	3	1.73
A6NKT7	8	Y	FYFAKLYYEAKEYDL	P49792	RANBP2	P04629	TRKA	String	TK/Trk	2.62	2.34
A6NKT7	8	Y	FYFAKLYYEAKEYDL	P49792	RANBP2	Q16288	TRKC	String	TK/Trk	2.62	2.34
F6QR24	8	S	KTSQLGDSPFYPGKT	P49790	NUP153	P28482	Erk2	String	CMGC/MAPK	1.44	1.17
F6QR24	8	S	KTSQLGDSPFYPGKT	P49790	NUP153	Q16539	p38a	Exp.&String	CMGC/MAPK	1.44	1.17
F6QR24	8	S	KTSQLGDSPFYPGKT	P49790	NUP153	O15264	p38d	Exp.&String	CMGC/MAPK	1.44	1.17
F6QR24	8	S	KTSQLGDSPFYPGKT	P49790	NUP153	P06493	CDC2	String	CMGC/CDK/CDC2	2.31	1.58
F6QR24	8	S	KTSQLGDSPFYPGKT	P49790	NUP153	P24941	CDK2	String	CMGC/CDK/CDC2	2.31	1.58
P49792	8	S	SPATGILSPRGDDYF	P49792	RANBP2	P06493	CDC2	String	CMGC/CDK/CDC2	1.69	1.58
P49792	8	S	SPATGILSPRGDDYF	P49792	RANBP2	P24941	CDK2	String	CMGC/CDK/CDC2	1.69	1.58
P49792	8	S	SPATGILSPRGDDYF	P49792	RANBP2	P42345	FRAP	String	Atypical/PIKK/FRAP	3.87	2.79
P49792	8	S	CQNPRKQSLPATSIP	P49792	RANBP2	Q13555	CaMK2g	String	CAMK/CAMK2	2.22	1.56
P49792	8	S	CQNPRKQSLPATSIP	P49792	RANBP2	Q13554	CaMK2b	String	CAMK/CAMK2	2.22	1.56
P49792	8	S	CQNPRKQSLPATSIP	P49792	RANBP2	Q13557	CaMK2d	String	CAMK/CAMK2	2.22	1.56
P49792	8	S	CQNPRKQSLPATSIP	P49792	RANBP2	Q7L7X3	TAO1	String	STE/STE20	2.26	1.4
P49792	8	S	CQNPRKQSLPATSIP	P49792	RANBP2	Q9Y4K4	KHS1	String	STE/STE20	2.26	1.4
P49792	8	S	CQNPRKQSLPATSIP	P49792	RANBP2	Q8NEV4	MYO3A	String	STE/STE20	2.26	1.4
P49792	8	S	CQNPRKQSLPATSIP	P49792	RANBP2	Q9H2K8	TAO3	String	STE/STE20	2.26	1.4
P49792	8	S	CQNPRKQSLPATSIP	P49792	RANBP2	Q53TX8	HGK	String	STE/STE20	2.26	1.4
P49792	8	S	CQNPRKQSLPATSIP	P49792	RANBP2	D3DRA1	SLK	String	STE/STE20	2.26	1.4
P49792	8	S	CQNPRKQSLPATSIP	P49792	RANBP2	Q13153	PAK1	String	STE/STE20	2.26	1.4
P49792	8	S	CQNPRKQSLPATSIP	P49792	RANBP2	Q8N4C8	MINK	String	STE/STE20	2.26	1.4
P49792	8	S	CQNPRKQSLPATSIP	P49792	RANBP2	Q9C0K7	STLK6	String	STE/STE20	2.26	1.4
P49792	8	S	CQNPRKQSLPATSIP	P49792	RANBP2	O96013	PAK4	String	STE/STE20	2.26	1.4
P49792	8	S	CQNPRKQSLPATSIP	P49792	RANBP2	Q92918	HPK1	String	STE/STE20	2.26	1.4
P49792	8	S	CQNPRKQSLPATSIP	P49792	RANBP2	O00506	YSK1	String	STE/STE20	2.26	1.4
P49792	8	S	CQNPRKQSLPATSIP	P49792	RANBP2	Q13177	PAK2	String	STE/STE20	2.26	1.4
P49792	8	S	CQNPRKQSLPATSIP	P49792	RANBP2	O94804	LOK	String	STE/STE20	2.26	1.4
P49792	8	S	CQNPRKQSLPATSIP	P49792	RANBP2	Q7RTN6	STLK5	String	STE/STE20	2.26	1.4
P49792	8	S	CQNPRKQSLPATSIP	P49792	RANBP2	C9J3X5	MYO3B	String	STE/STE20	2.26	1.4
P49792	8	S	CQNPRKQSLPATSIP	P49792	RANBP2	Q8IVH8	KHS2	String	STE/STE20	2.26	1.4
P49792	8	S	CQNPRKQSLPATSIP	P49792	RANBP2	Q9P286	PAK5	String	STE/STE20	2.26	1.4
P49792	8	S	CQNPRKQSLPATSIP	P49792	RANBP2	O95747	OSR1	String	STE/STE20	2.26	1.4
P49792	8	S	CQNPRKQSLPATSIP	P49792	RANBP2	Q9P289	MST4	String	STE/STE20	2.26	1.4
P49792	8	S	CQNPRKQSLPATSIP	P49792	RANBP2	Q7Z2Y5	NRK	String	STE/STE20	2.26	1.4
P49792	8	S	CQNPRKQSLPATSIP	P49792	RANBP2	C7G533	AurB	String	Other/AUR/AUR-B	3.21	2.04
P49792	8	S	LNSSNSASPHRWPTE	P49792	RANBP2	P53350	PLK1	String	Other/PLK	1.33	1.21
P49792	8	S	LNSSNSASPHRWPTE	P49792	RANBP2	O00444	PLK4	String	Other/PLK	1.33	1.21
P49792	8	S	LNSSNSASPHRWPTE	P49792	RANBP2	Q9NYY3	PLK2	String	Other/PLK	1.33	1.21
P49792	8	S	LNSSNSASPHRWPTE	P49792	RANBP2	P06493	CDC2	String	CMGC/CDK/CDC2	3.98	1.58
P49792	8	S	LNSSNSASPHRWPTE	P49792	RANBP2	P24941	CDK2	String	CMGC/CDK/CDC2	3.98	1.58
P49792	8	T	PGKSVFGTPTLETAN	P49792	RANBP2	P06493	CDC2	String	CMGC/CDK/CDC2	3.37	1.58
P49792	8	T	PGKSVFGTPTLETAN	P49792	RANBP2	P24941	CDK2	String	CMGC/CDK/CDC2	3.37	1.58
P49792	8	T	PGKSVFGTPTLETAN	P49792	RANBP2	P42345	FRAP	String	Atypical/PIKK/FRAP	3.13	2.79
H3BMQ0	8	S	GARDRVRSMSGGHGL	P49815	TSC2	Q96S38	RSKL1	String	AGC	3.5	1.94
H3BMQ0	8	S	GARDRVRSMSGGHGL	P49815	TSC2	Q15208	NDR1	String	AGC	3.5	1.94
H3BMQ0	8	S	GARDRVRSMSGGHGL	P49815	TSC2	O60307	MAST3	String	AGC	3.5	1.94
H3BMQ0	8	S	GARDRVRSMSGGHGL	P49815	TSC2	Q9Y2H9	MAST1	String	AGC	3.5	1.94
H3BMQ0	8	S	GARDRVRSMSGGHGL	P49815	TSC2	Q96GX5	MASTL	String	AGC	3.5	1.94
H3BMQ0	8	S	GARDRVRSMSGGHGL	P49815	TSC2	Q9Y6S9	RSKL2	String	AGC	3.5	1.94
H3BMQ0	8	S	GARDRVRSMSGGHGL	P49815	TSC2	Q96LW2	SgK494	String	AGC	3.5	1.94
H3BMQ0	8	S	GARDRVRSMSGGHGL	P49815	TSC2	Q9NY57	YANK2	String	AGC	3.5	1.94
H3BMQ0	8	S	GARDRVRSMSGGHGL	P49815	TSC2	Q9Y2H1	NDR2	String	AGC	3.5	1.94
H3BMQ0	8	S	GARDRVRSMSGGHGL	P49815	TSC2	Q9NRM7	LATS2	String	AGC	3.5	1.94
H3BMQ0	8	S	GARDRVRSMSGGHGL	P49815	TSC2	Q6P0Q8	MAST2	String	AGC	3.5	1.94
[truncated: 3,348 more rows]

## Sheet: Table S4
Table S4. The enrichment analysis of GO annotations for phosphorylated proteins in the MHCC97-H cell line with the hypergeometric test (p-value < 0.01).
GO	Definition	Phosphoproteome		Proteome		E-ratio	p-value
		Num.	Per.	Num.	Per.
The most over- or under-represented biological_process
GO:0006351	transcription, DNA-templated	219	0.104186	2252	0.0524196	1.98755	1.13698e-22
GO:0045892	negative regulation of transcription, DNA-templated	81	0.0385347	575	0.0133842	2.87911	1.39386e-17
GO:0006397	mRNA processing	43	0.0204567	220	0.00512092	3.99473	6.55029e-15
GO:0008380	RNA splicing	47	0.0223597	268	0.00623822	3.5843	2.71546e-14
GO:0016032	viral process	77	0.0366318	621	0.014455	2.5342	9.25531e-14
GO:0000278	mitotic cell cycle	60	0.0285442	421	0.00979959	2.9128	1.29988e-13
GO:0010467	gene expression	77	0.0366318	675	0.0157119	2.33146	6.3999e-12
GO:0007067	mitotic nuclear division	44	0.0209324	282	0.00656409	3.18893	1.10092e-11
GO:0006468	protein phosphorylation	117	0.0556613	1257	0.0292591	1.90236	2.46467e-11
GO:0000122	negative regulation of transcription from RNA polymerase II promoter	94	0.0447193	978	0.0227648	1.9644	4.46306e-10
GO:0006364	rRNA processing	23	0.010942	111	0.00258374	4.23493	3.67632e-09
GO:0006974	cellular response to DNA damage stimulus	32	0.0152236	201	0.00467866	3.25384	4.0942e-09
GO:0022604	regulation of cell morphogenesis	10	0.00475737	20	0.000465539	10.2191	9.05678e-09
GO:0006200	ATP catabolic process	59	0.0280685	541	0.0125928	2.22893	9.67044e-09
GO:0000398	mRNA splicing, via spliceosome	30	0.0142721	192	0.00446917	3.19346	1.91832e-08
GO:0007010	cytoskeleton organization	24	0.0114177	131	0.00304928	3.74439	2.1817e-08
GO:0007049	cell cycle	39	0.0185538	302	0.00702963	2.63936	3.73889e-08
GO:0006915	apoptotic process	67	0.0318744	679	0.015805	2.01673	5.20963e-08
GO:0006366	transcription from RNA polymerase II promoter	59	0.0280685	577	0.0134308	2.08986	9.51652e-08
GO:0043547	positive regulation of GTPase activity	48	0.0228354	430	0.0100091	2.28147	1.10828e-07
GO:0045945	positive regulation of transcription from RNA polymerase III promoter	7	0.00333016	11	0.000256046	13.0061	1.84334e-07
GO:0032321	positive regulation of Rho GTPase activity	30	0.0142721	217	0.00505109	2.82555	3.07761e-07
GO:0051056	regulation of small GTPase mediated signal transduction	27	0.0128449	188	0.00437606	2.93527	5.49172e-07
GO:0007050	cell cycle arrest	25	0.0118934	167	0.00388725	3.0596	6.48363e-07
GO:0006281	DNA repair	48	0.0228354	457	0.0106376	2.14668	6.69729e-07
GO:0051028	mRNA transport	15	0.00713606	69	0.00160611	4.44308	9.72914e-07
GO:0006897	endocytosis	24	0.0114177	163	0.00379414	3.0093	1.45786e-06
GO:0043044	ATP-dependent chromatin remodeling	9	0.00428164	26	0.0006052	7.07475	2.31136e-06
GO:0006921	cellular component disassembly involved in execution phase of apoptosis	12	0.00570885	48	0.00111729	5.10954	2.45339e-06
GO:0035556	intracellular signal transduction	58	0.0275928	626	0.0145714	1.89363	2.97418e-06
GO:0006260	DNA replication	29	0.0137964	230	0.00535369	2.57698	3.21477e-06
GO:0032508	DNA duplex unwinding	15	0.00713606	77	0.00179232	3.98146	4.1876e-06
GO:0000186	activation of MAPKK activity	14	0.00666032	68	0.00158283	4.20786	4.40358e-06
GO:0034968	histone lysine methylation	10	0.00475737	35	0.000814692	5.83947	4.58305e-06
GO:0045893	positive regulation of transcription, DNA-templated	56	0.0266413	608	0.0141524	1.88246	5.20888e-06
GO:0051569	regulation of histone H3-K4 methylation	5	0.00237869	7	0.000162938	14.5987	5.39501e-06
GO:0007077	mitotic nuclear envelope disassembly	10	0.00475737	37	0.000861246	5.52383	7.95045e-06
GO:0006337	nucleosome disassembly	7	0.00333016	17	0.000395708	8.41571	8.37242e-06
GO:0010506	regulation of autophagy	9	0.00428164	30	0.000698308	6.13145	8.85974e-06
GO:0006406	mRNA export from nucleus	14	0.00666032	73	0.00169922	3.91965	1.05057e-05
GO:0042796	snRNA transcription from RNA polymerase III promoter	4	0.00190295	5	0.000116385	16.3505	2.74609e-05
GO:0007165	signal transduction	105	0.0499524	1439	0.0334955	1.49132	3.27676e-05
GO:0010923	negative regulation of phosphatase activity	11	0.00523311	53	0.00123368	4.24188	4.26085e-05
GO:0045944	positive regulation of transcription from RNA polymerase II promoter	92	0.0437678	1232	0.0286772	1.52623	4.31759e-05
GO:0016568	chromatin modification	17	0.00808754	117	0.0027234	2.96965	5.63233e-05
GO:0006338	chromatin remodeling	16	0.0076118	106	0.00246735	3.085	5.77159e-05
GO:0007569	cell aging	9	0.00428164	38	0.000884523	4.84062	7.082e-05
GO:0030879	mammary gland development	8	0.0038059	30	0.000698308	5.45017	7.20549e-05
GO:0061024	membrane organization	20	0.00951475	155	0.00360792	2.63718	7.37135e-05
GO:0007257	activation of JUN kinase activity	10	0.00475737	47	0.00109402	4.34854	7.55887e-05
GO:0030521	androgen receptor signaling pathway	10	0.00475737	47	0.00109402	4.34854	7.55887e-05
GO:0000281	mitotic cytokinesis	9	0.00428164	39	0.0009078	4.7165	8.80858e-05
GO:0010390	histone monoubiquitination	5	0.00237869	11	0.000256046	9.29007	0.000100595
GO:0031669	cellular response to nutrient levels	5	0.00237869	11	0.000256046	9.29007	0.000100595
GO:2001237	negative regulation of extrinsic apoptotic signaling pathway	11	0.00523311	58	0.00135006	3.8762	0.00010167
GO:0008283	cell proliferation	41	0.0195052	448	0.0104281	1.87046	0.000103019
GO:0031937	positive regulation of chromatin silencing	3	0.00142721	3	6.98308e-05	20.4382	0.000116973
GO:0006461	protein complex assembly	18	0.00856327	136	0.00316566	2.70505	0.00011924
GO:0007094	mitotic spindle assembly checkpoint	9	0.00428164	41	0.000954354	4.48642	0.000133316
GO:0090004	positive regulation of establishment of protein localization to plasma membrane	7	0.00333016	25	0.000581923	5.72268	0.000146498
GO:0007059	chromosome segregation	14	0.00666032	92	0.00214148	3.11015	0.000150297
GO:0007064	mitotic sister chromatid cohesion	5	0.00237869	12	0.000279323	8.5159	0.000165485
GO:0045719	negative regulation of glycogen biosynthetic process	5	0.00237869	12	0.000279323	8.5159	0.000165485
GO:2000145	regulation of cell motility	5	0.00237869	12	0.000279323	8.5159	0.000165485
GO:0008286	insulin receptor signaling pathway	22	0.0104662	190	0.00442262	2.36652	0.000167436
GO:0006357	regulation of transcription from RNA polymerase II promoter	37	0.0176023	400	0.00931077	1.89053	0.000176582
GO:0042795	snRNA transcription from RNA polymerase II promoter	4	0.00190295	7	0.000162938	11.6789	0.000177535
GO:0051726	regulation of cell cycle	22	0.0104662	192	0.00446917	2.34187	0.000194726
GO:0045727	positive regulation of translation	11	0.00523311	63	0.00146645	3.56857	0.000219751
GO:0048011	neurotrophin TRK receptor signaling pathway	28	0.0133206	276	0.00642443	2.07344	0.000234839
GO:0006396	RNA processing	16	0.0076118	120	0.00279323	2.72509	0.000255514
GO:0016239	positive regulation of macroautophagy	5	0.00237869	13	0.0003026	7.86083	0.000258067
GO:0006325	chromatin organization	16	0.0076118	121	0.00281651	2.70257	0.000281263
GO:0016477	cell migration	23	0.010942	212	0.00493471	2.21735	0.000315126
GO:0000086	G2/M transition of mitotic cell cycle	18	0.00856327	147	0.00342171	2.50263	0.000319135
GO:0006369	termination of RNA polymerase II transcription	9	0.00428164	46	0.00107074	3.99877	0.000336331
GO:0086069	bundle of His cell to Purkinje myocyte communication	4	0.00190295	8	0.000186215	10.2191	0.000341267
GO:0035019	somatic stem cell maintenance	10	0.00475737	56	0.00130351	3.64967	0.00034828
GO:0032435	negative regulation of proteasomal ubiquitin-dependent protein catabolic process	6	0.00285442	21	0.000488815	5.83947	0.000391221
GO:0032968	positive regulation of transcription elongation from RNA polymerase II promoter	6	0.00285442	21	0.000488815	5.83947	0.000391221
GO:0001701	in utero embryonic development	37	0.0176023	418	0.00972975	1.80912	0.000414749
GO:0008285	negative regulation of cell proliferation	44	0.0209324	527	0.0122669	1.70641	0.000446177
GO:0030174	regulation of DNA-dependent DNA replication initiation	3	0.00142721	4	9.31077e-05	15.3286	0.000450745
GO:0060414	aorta smooth muscle tissue morphogenesis	3	0.00142721	4	9.31077e-05	15.3286	0.000450745
GO:0071896	protein localization to adherens junction	3	0.00142721	4	9.31077e-05	15.3286	0.000450745
GO:0008610	lipid biosynthetic process	5	0.00237869	15	0.000349154	6.81272	0.000554652
GO:0048025	negative regulation of mRNA splicing, via spliceosome	5	0.00237869	15	0.000349154	6.81272	0.000554652
GO:0051457	maintenance of protein location in nucleus	5	0.00237869	15	0.000349154	6.81272	0.000554652
GO:0019827	stem cell maintenance	12	0.00570885	81	0.00188543	3.02787	0.000560279
GO:0042787	protein ubiquitination involved in ubiquitin-dependent protein catabolic process	11	0.00523311	70	0.00162938	3.21171	0.000564679
GO:0006306	DNA methylation	7	0.00333016	31	0.000721585	4.61507	0.000619391
GO:0033138	positive regulation of peptidyl-serine phosphorylation	11	0.00523311	71	0.00165266	3.16647	0.000639039
GO:0007093	mitotic cell cycle checkpoint	8	0.0038059	41	0.000954354	3.98793	0.000728453
GO:0006890	retrograde vesicle-mediated transport, Golgi to ER	7	0.00333016	32	0.000744862	4.47085	0.000759598
GO:0010827	regulation of glucose transport	7	0.00333016	32	0.000744862	4.47085	0.000759598
GO:0031929	TOR signaling	5	0.00237869	16	0.000372431	6.38692	0.000774353
GO:1902187	negative regulation of viral release from host cell	5	0.00237869	16	0.000372431	6.38692	0.000774353
GO:0006950	response to stress	13	0.00618459	96	0.00223458	2.76767	0.000807762
GO:0008645	hexose transport	8	0.0038059	42	0.000977631	3.89298	0.000861653
GO:0006333	chromatin assembly or disassembly	4	0.00190295	10	0.000232769	8.17526	0.000945949
GO:0006335	DNA replication-dependent nucleosome assembly	4	0.00190295	10	0.000232769	8.17526	0.000945949
GO:0006342	chromatin silencing	4	0.00190295	10	0.000232769	8.17526	0.000945949
GO:0010793	regulation of mRNA export from nucleus	4	0.00190295	10	0.000232769	8.17526	0.000945949
GO:0042993	positive regulation of transcription factor import into nucleus	4	0.00190295	10	0.000232769	8.17526	0.000945949
GO:0007173	epidermal growth factor receptor signaling pathway	21	0.00999049	202	0.00470194	2.12476	0.000977224
GO:0031124	mRNA 3'-end processing	8	0.0038059	43	0.00100091	3.80245	0.00101369
GO:0050434	positive regulation of viral transcription	8	0.0038059	43	0.00100091	3.80245	0.00101369
GO:0009967	positive regulation of signal transduction	10	0.00475737	64	0.00148972	3.19346	0.00103952
GO:0010800	positive regulation of peptidyl-threonine phosphorylation	5	0.00237869	17	0.000395708	6.01122	0.00105298
GO:0010508	positive regulation of autophagy	6	0.00285442	25	0.000581923	4.90516	0.00107918
GO:0070849	response to epidermal growth factor	3	0.00142721	5	0.000116385	12.2629	0.00108567
GO:0070934	CRD-mediated mRNA stabilization	3	0.00142721	5	0.000116385	12.2629	0.00108567
GO:0032869	cellular response to insulin stimulus	12	0.00570885	88	0.00204837	2.78702	0.00118858
GO:0032851	positive regulation of Rab GTPase activity	16	0.0076118	138	0.00321222	2.36964	0.00121046
GO:0001932	regulation of protein phosphorylation	6	0.00285442	26	0.0006052	4.7165	0.00134533
GO:0002089	lens morphogenesis in camera-type eye	5	0.00237869	18	0.000418985	5.67727	0.00139956
GO:0031065	positive regulation of histone deacetylation	5	0.00237869	18	0.000418985	5.67727	0.00139956
GO:0000183	chromatin silencing at rDNA	4	0.00190295	11	0.000256046	7.43206	0.00142901
GO:0001711	endodermal cell fate commitment	4	0.00190295	11	0.000256046	7.43206	0.00142901
GO:0010225	response to UV-C	4	0.00190295	11	0.000256046	7.43206	0.00142901
GO:1902017	regulation of cilium assembly	7	0.00333016	36	0.000837969	3.97409	0.001588
GO:0043966	histone H3 acetylation	8	0.0038059	46	0.00107074	3.55446	0.00160195
GO:0048008	platelet-derived growth factor receptor signaling pathway	8	0.0038059	46	0.00107074	3.55446	0.00160195
GO:0030520	intracellular estrogen receptor signaling pathway	5	0.00237869	19	0.000442262	5.37846	0.00182339
GO:0071108	protein K48-linked deubiquitination	5	0.00237869	19	0.000442262	5.37846	0.00182339
GO:0006936	muscle contraction	13	0.00618459	105	0.00244408	2.53044	0.00186333
GO:0030835	negative regulation of actin filament depolymerization	4	0.00190295	12	0.000279323	6.81272	0.00206077
GO:0032786	positive regulation of DNA-templated transcription, elongation	4	0.00190295	12	0.000279323	6.81272	0.00206077
GO:0035067	negative regulation of histone acetylation	4	0.00190295	12	0.000279323	6.81272	0.00206077
GO:0045197	establishment or maintenance of epithelial cell apical/basal polarity	4	0.00190295	12	0.000279323	6.81272	0.00206077
GO:0033120	positive regulation of RNA splicing	3	0.00142721	6	0.000139662	10.2191	0.00209217
GO:0033599	regulation of mammary gland epithelial cell proliferation	3	0.00142721	6	0.000139662	10.2191	0.00209217
GO:0042791	5S class rRNA transcription from RNA polymerase III type 1 promoter	3	0.00142721	6	0.000139662	10.2191	0.00209217
GO:0042797	tRNA transcription from RNA polymerase III promoter	3	0.00142721	6	0.000139662	10.2191	0.00209217
GO:0070309	lens fiber cell morphogenesis	3	0.00142721	6	0.000139662	10.2191	0.00209217
GO:0007266	Rho protein signal transduction	9	0.00428164	59	0.00137334	3.11768	0.00216993
GO:0033077	T cell differentiation in thymus	9	0.00428164	59	0.00137334	3.11768	0.00216993
GO:0032007	negative regulation of TOR signaling	7	0.00333016	38	0.000884523	3.76492	0.0022047
GO:0030036	actin cytoskeleton organization	21	0.00999049	216	0.00502782	1.98704	0.00224799
GO:0007051	spindle organization	5	0.00237869	20	0.000465539	5.10954	0.00233403
GO:0070365	hepatocyte differentiation	5	0.00237869	20	0.000465539	5.10954	0.00233403
GO:0000189	MAPK import into nucleus	2	0.000951475	2	4.65539e-05	20.4382	0.00239288
GO:0007070	negative regulation of transcription from RNA polymerase II promoter during mitosis	2	0.000951475	2	4.65539e-05	20.4382	0.00239288
GO:0031134	sister chromatid biorientation	2	0.000951475	2	4.65539e-05	20.4382	0.00239288
GO:0032071	regulation of endodeoxyribonuclease activity	2	0.000951475	2	4.65539e-05	20.4382	0.00239288
GO:0033043	regulation of organelle organization	2	0.000951475	2	4.65539e-05	20.4382	0.00239288
GO:0035026	leading edge cell differentiation	2	0.000951475	2	4.65539e-05	20.4382	0.00239288
GO:0060370	susceptibility to T cell mediated cytotoxicity	2	0.000951475	2	4.65539e-05	20.4382	0.00239288
GO:0060988	lipid tube assembly	2	0.000951475	2	4.65539e-05	20.4382	0.00239288
GO:0070816	phosphorylation of RNA polymerase II C-terminal domain	2	0.000951475	2	4.65539e-05	20.4382	0.00239288
GO:2000077	negative regulation of type B pancreatic cell development	2	0.000951475	2	4.65539e-05	20.4382	0.00239288
GO:2000401	regulation of lymphocyte migration	2	0.000951475	2	4.65539e-05	20.4382	0.00239288
GO:0007179	transforming growth factor beta receptor signaling pathway	19	0.00903901	189	0.00439934	2.05463	0.00243886
GO:0097193	intrinsic apoptotic signaling pathway	9	0.00428164	60	0.00139662	3.06572	0.00244387
GO:0045930	negative regulation of mitotic cell cycle	6	0.00285442	29	0.000675031	4.22858	0.00244832
GO:0006270	DNA replication initiation	7	0.00333016	39	0.0009078	3.66839	0.00257507
GO:0008219	cell death	22	0.0104662	234	0.0054468	1.92154	0.00272155
GO:0007289	spermatid nucleus differentiation	4	0.00190295	13	0.0003026	6.28866	0.00286197
GO:0045651	positive regulation of macrophage differentiation	4	0.00190295	13	0.0003026	6.28866	0.00286197
GO:0007018	microtubule-based movement	19	0.00903901	192	0.00446917	2.02253	0.00291057
GO:0000381	regulation of alternative mRNA splicing, via spliceosome	6	0.00285442	30	0.000698308	4.08763	0.00293527
GO:0071901	negative regulation of protein serine/threonine kinase activity	6	0.00285442	30	0.000698308	4.08763	0.00293527
GO:0006820	anion transport	7	0.00333016	40	0.000931077	3.57668	0.0029914
GO:0009615	response to virus	16	0.0076118	151	0.00351482	2.16563	0.00306706
GO:0007596	blood coagulation	39	0.0185538	501	0.0116617	1.59099	0.00316482
GO:0034329	cell junction assembly	10	0.00475737	75	0.00174577	2.72509	0.00350371
GO:0002903	negative regulation of B cell apoptotic process	3	0.00142721	7	0.000162938	8.75921	0.00352815
GO:0016584	nucleosome positioning	3	0.00142721	7	0.000162938	8.75921	0.00352815
GO:0030240	skeletal muscle thin filament assembly	3	0.00142721	7	0.000162938	8.75921	0.00352815
GO:0031497	chromatin assembly	3	0.00142721	7	0.000162938	8.75921	0.00352815
GO:0060042	retina morphogenesis in camera-type eye	3	0.00142721	7	0.000162938	8.75921	0.00352815
GO:0060318	definitive erythrocyte differentiation	3	0.00142721	7	0.000162938	8.75921	0.00352815
GO:0086005	ventricular cardiac muscle cell action potential	5	0.00237869	22	0.000512092	4.64504	0.00365451
GO:0002244	hematopoietic progenitor cell differentiation	15	0.00713606	140	0.00325877	2.1898	0.00365968
GO:0006644	phospholipid metabolic process	17	0.00808754	168	0.00391052	2.06815	0.00374377
GO:0033160	positive regulation of protein import into nucleus, translocation	4	0.00190295	14	0.000325877	5.83947	0.00385265
GO:0080182	histone H3-K4 trimethylation	4	0.00190295	14	0.000325877	5.83947	0.00385265
GO:0032312	regulation of ARF GTPase activity	10	0.00475737	76	0.00176905	2.68923	0.00386126
GO:0048015	phosphatidylinositol-mediated signaling	16	0.0076118	155	0.00360792	2.10974	0.00397326
GO:2001238	positive regulation of extrinsic apoptotic signaling pathway	7	0.00333016	42	0.000977631	3.40636	0.00397644
GO:0071260	cellular response to mechanical stimulus	11	0.00523311	89	0.00207165	2.52606	0.00409723
GO:0007160	cell-matrix adhesion	18	0.00856327	185	0.00430623	1.98858	0.00441395
GO:0001731	formation of translation preinitiation complex	5	0.00237869	23	0.000535369	4.44308	0.0044838
GO:0070555	response to interleukin-1	7	0.00333016	43	0.00100091	3.32714	0.00455253
GO:2000134	negative regulation of G1/S transition of mitotic cell cycle	6	0.00285442	33	0.000768139	3.71603	0.00483202
GO:0006268	DNA unwinding involved in DNA replication	4	0.00190295	15	0.000349154	5.45017	0.00505193
GO:0016050	vesicle organization	4	0.00190295	15	0.000349154	5.45017	0.00505193
GO:0032784	regulation of DNA-templated transcription, elongation	4	0.00190295	15	0.000349154	5.45017	0.00505193
GO:0032863	activation of Rac GTPase activity	4	0.00190295	15	0.000349154	5.45017	0.00505193
GO:0050821	protein stabilization	12	0.00570885	105	0.00244408	2.33579	0.00529112
GO:0000733	DNA strand renaturation	3	0.00142721	8	0.000186215	7.66431	0.00544028
GO:0007096	regulation of exit from mitosis	3	0.00142721	8	0.000186215	7.66431	0.00544028
GO:0031325	positive regulation of cellular metabolic process	3	0.00142721	8	0.000186215	7.66431	0.00544028
GO:0034501	protein localization to kinetochore	3	0.00142721	8	0.000186215	7.66431	0.00544028
GO:0035372	protein localization to microtubule	3	0.00142721	8	0.000186215	7.66431	0.00544028
GO:0045087	innate immune response	55	0.0261656	787	0.0183189	1.42833	0.00549816
GO:0008543	fibroblast growth factor receptor signaling pathway	19	0.00903901	204	0.00474849	1.90355	0.00562453
GO:0043627	response to estrogen	12	0.00570885	106	0.00246735	2.31375	0.00570737
GO:0000380	alternative mRNA splicing, via spliceosome	4	0.00190295	16	0.000372431	5.10954	0.00647778
GO:0006777	Mo-molybdopterin cofactor biosynthetic process	4	0.00190295	16	0.000372431	5.10954	0.00647778
GO:0045910	negative regulation of DNA recombination	4	0.00190295	16	0.000372431	5.10954	0.00647778
GO:0046827	positive regulation of protein export from nucleus	4	0.00190295	16	0.000372431	5.10954	0.00647778
GO:0097150	neuronal stem cell maintenance	4	0.00190295	16	0.000372431	5.10954	0.00647778
GO:2000811	negative regulation of anoikis	4	0.00190295	16	0.000372431	5.10954	0.00647778
GO:0014065	phosphatidylinositol 3-kinase signaling	5	0.00237869	25	0.000581923	4.08763	0.00652853
GO:0006302	double-strand break repair	10	0.00475737	82	0.00190871	2.49246	0.00665343
GO:0006096	glycolytic process	13	0.00618459	122	0.00283978	2.17784	0.00684767
GO:0043524	negative regulation of neuron apoptotic process	19	0.00903901	208	0.0048416	1.86695	0.00689401
GO:0000819	sister chromatid segregation	2	0.000951475	3	6.98308e-05	13.6254	0.00694468
GO:0002194	hepatocyte cell migration	2	0.000951475	3	6.98308e-05	13.6254	0.00694468
GO:0030910	olfactory placode formation	2	0.000951475	3	6.98308e-05	13.6254	0.00694468
GO:0032066	nucleolus to nucleoplasm transport	2	0.000951475	3	6.98308e-05	13.6254	0.00694468
GO:0032911	negative regulation of transforming growth factor beta1 production	2	0.000951475	3	6.98308e-05	13.6254	0.00694468
GO:0035089	establishment of apical/basal cell polarity	2	0.000951475	3	6.98308e-05	13.6254	0.00694468
GO:0040009	regulation of growth rate	2	0.000951475	3	6.98308e-05	13.6254	0.00694468
GO:0051220	cytoplasmic sequestering of protein	2	0.000951475	3	6.98308e-05	13.6254	0.00694468
GO:0051310	metaphase plate congression	2	0.000951475	3	6.98308e-05	13.6254	0.00694468
GO:0071651	positive regulation of chemokine (C-C motif) ligand 5 production	2	0.000951475	3	6.98308e-05	13.6254	0.00694468
GO:0072574	hepatocyte proliferation	2	0.000951475	3	6.98308e-05	13.6254	0.00694468
GO:0090043	regulation of tubulin deacetylation	2	0.000951475	3	6.98308e-05	13.6254	0.00694468
GO:1901978	positive regulation of cell cycle checkpoint	2	0.000951475	3	6.98308e-05	13.6254	0.00694468
GO:1990001	inhibition of cysteine-type endopeptidase activity involved in apoptotic process	2	0.000951475	3	6.98308e-05	13.6254	0.00694468
GO:2000286	receptor internalization involved in canonical Wnt signaling pathway	2	0.000951475	3	6.98308e-05	13.6254	0.00694468
GO:2000370	positive regulation of clathrin-mediated endocytosis	2	0.000951475	3	6.98308e-05	13.6254	0.00694468
GO:2000979	positive regulation of forebrain neuron differentiation	2	0.000951475	3	6.98308e-05	13.6254	0.00694468
GO:0006892	post-Golgi vesicle-mediated transport	7	0.00333016	47	0.00109402	3.04398	0.00750255
GO:0070527	platelet aggregation	7	0.00333016	47	0.00109402	3.04398	0.00750255
GO:0030148	sphingolipid biosynthetic process	6	0.00285442	36	0.000837969	3.40636	0.00750276
GO:0071353	cellular response to interleukin-4	6	0.00285442	36	0.000837969	3.40636	0.00750276
GO:0030866	cortical actin cytoskeleton organization	5	0.00237869	26	0.0006052	3.93041	0.00776263
GO:0000075	cell cycle checkpoint	3	0.00142721	9	0.000209492	6.81272	0.0078652
GO:0006853	carnitine shuttle	3	0.00142721	9	0.000209492	6.81272	0.0078652
GO:0034351	negative regulation of glial cell apoptotic process	3	0.00142721	9	0.000209492	6.81272	0.0078652
GO:0042035	regulation of cytokine biosynthetic process	3	0.00142721	9	0.000209492	6.81272	0.0078652
GO:0046325	negative regulation of glucose import	3	0.00142721	9	0.000209492	6.81272	0.0078652
GO:0051534	negative regulation of NFAT protein import into nucleus	3	0.00142721	9	0.000209492	6.81272	0.0078652
GO:2000505	regulation of energy homeostasis	3	0.00142721	9	0.000209492	6.81272	0.0078652
GO:0002230	positive regulation of defense response to virus by host	4	0.00190295	17	0.000395708	4.80898	0.00814695
GO:0035338	long-chain fatty-acyl-CoA biosynthetic process	4	0.00190295	17	0.000395708	4.80898	0.00814695
GO:0031532	actin cytoskeleton reorganization	9	0.00428164	72	0.00167594	2.55477	0.00835491
GO:0006367	transcription initiation from RNA polymerase II promoter	19	0.00903901	212	0.00493471	1.83172	0.00838702
GO:0031647	regulation of protein stability	6	0.00285442	37	0.000861246	3.3143	0.00859165
GO:0050900	leukocyte migration	12	0.00570885	112	0.00260702	2.1898	0.00877898
GO:0007411	axon guidance	31	0.0147479	402	0.00935732	1.57608	0.00890441
GO:0006310	DNA recombination	11	0.00523311	99	0.00230442	2.27091	0.00909979
GO:0032855	positive regulation of Rac GTPase activity	7	0.00333016	49	0.00114057	2.91974	0.00941876
GO:0051259	protein oligomerization	7	0.00333016	49	0.00114057	2.91974	0.00941876
GO:0006606	protein import into nucleus	8	0.0038059	61	0.00141989	2.68041	0.00948822
GO:0006810	transport	17	0.00808754	592	0.0137799	0.586906	0.00979662
GO:0006508	proteolysis	13	0.00618459	1312	0.0305393	0.202512	1.49975e-15
GO:0007186	G-protein coupled receptor signaling pathway	14	0.00666032	1063	0.0247434	0.269176	1.44179e-10
GO:0055114	oxidation-reduction process	34	0.0161751	1468	0.0341705	0.473363	2.14085e-07
GO:0050911	detection of chemical stimulus involved in sensory perception of smell	4	0.00190295	426	0.00991597	0.191908	5.59204e-06
GO:0008152	metabolic process	53	0.0252141	1787	0.0415959	0.606168	2.50676e-05
GO:0006955	immune response	10	0.00475737	594	0.0138265	0.344077	2.76953e-05
GO:0006958	complement activation, classical pathway	1	0.000475737	162	0.00377086	0.126161	0.00272501
GO:0006956	complement activation	1	0.000475737	161	0.00374759	0.126945	0.00284989
GO:0010951	negative regulation of endopeptidase activity	3	0.00142721	220	0.00512092	0.278702	0.00498514
The most over- or under-represented molecular_function
GO:0005515	protein binding	689	0.327783	6241	0.145271	2.25635	8.8878e-105
GO:0044822	poly(A) RNA binding	210	0.0999049	1097	0.0255348	3.9125	8.4423e-67
GO:0005524	ATP binding	276	0.131304	3257	0.0758129	1.73194	9.33596e-20
GO:0003682	chromatin binding	89	0.0423406	639	0.014874	2.84663	7.27055e-19
GO:0003677	DNA binding	219	0.104186	2424	0.0564233	1.84652	7.78733e-19
GO:0003779	actin binding	83	0.0394862	577	0.0134308	2.93998	1.53067e-18
GO:0004674	protein serine/threonine kinase activity	83	0.0394862	677	0.0157585	2.50571	1.89463e-14
GO:0008270	zinc ion binding	188	0.0894386	2399	0.0558413	1.60166	1.05687e-10
GO:0000166	nucleotide binding	83	0.0394862	814	0.0189474	2.08399	2.8859e-10
GO:0003723	RNA binding	81	0.0385347	793	0.0184586	2.08763	4.34902e-10
GO:0042393	histone binding	21	0.00999049	85	0.00197854	5.04943	5.81537e-10
GO:0008134	transcription factor binding	46	0.0218839	346	0.00805382	2.71721	9.11243e-10
GO:0003713	transcription coactivator activity	38	0.018078	286	0.0066572	2.71556	2.59057e-08
GO:0019901	protein kinase binding	53	0.0252141	501	0.0116617	2.16212	1.43385e-07
GO:0003714	transcription corepressor activity	36	0.0171265	285	0.00663392	2.58166	2.13526e-07
GO:0005096	GTPase activator activity	28	0.0133206	196	0.00456228	2.91974	3.81637e-07
GO:0046966	thyroid hormone receptor binding	10	0.00475737	29	0.000675031	7.04764	6.54646e-07
GO:0018024	histone-lysine N-methyltransferase activity	12	0.00570885	43	0.00100091	5.70367	6.78189e-07
GO:0005089	Rho guanyl-nucleotide exchange factor activity	24	0.0114177	180	0.00418985	2.72509	8.46058e-06
GO:0042802	identical protein binding	54	0.0256898	598	0.0139196	1.84559	1.33058e-05
GO:0005516	calmodulin binding	27	0.0128449	223	0.00519075	2.47457	1.45953e-05
GO:0004386	helicase activity	15	0.00713606	86	0.00200182	3.56479	1.70923e-05
GO:0030374	ligand-dependent nuclear receptor transcription coactivator activity	11	0.00523311	51	0.00118712	4.40823	2.91294e-05
GO:0016922	ligand-dependent nuclear receptor binding	7	0.00333016	20	0.000465539	7.15335	2.93105e-05
GO:0017048	Rho GTPase binding	11	0.00523311	52	0.0012104	4.32346	3.53188e-05
GO:0047485	protein N-terminus binding	17	0.00808754	113	0.00263029	3.07477	3.58304e-05
GO:0017124	SH3 domain binding	21	0.00999049	160	0.00372431	2.68251	3.82356e-05
GO:0005070	SH3/SH2 adaptor activity	11	0.00523311	53	0.00123368	4.24188	4.26085e-05
GO:0005080	protein kinase C binding	11	0.00523311	54	0.00125695	4.16333	5.11556e-05
GO:0035257	nuclear hormone receptor binding	8	0.0038059	30	0.000698308	5.45017	7.20549e-05
GO:0008013	beta-catenin binding	15	0.00713606	97	0.00225786	3.16054	7.33015e-05
GO:0016874	ligase activity	29	0.0137964	272	0.00633132	2.17907	7.71666e-05
GO:0070087	chromo shadow domain binding	4	0.00190295	6	0.000139662	13.6254	7.91692e-05
GO:0003678	DNA helicase activity	8	0.0038059	31	0.000721585	5.27436	9.29637e-05
GO:0003700	sequence-specific DNA binding transcription factor activity	107	0.0509039	1517	0.0353111	1.44158	0.000104971
GO:0044212	transcription regulatory region DNA binding	25	0.0118934	223	0.00519075	2.29127	0.000105539
GO:0004709	MAP kinase kinase kinase activity	7	0.00333016	24	0.000558646	5.96113	0.00011012
GO:0004715	non-membrane spanning protein tyrosine kinase activity	10	0.00475737	50	0.00116385	4.08763	0.000131191
GO:0070577	lysine-acetylated histone binding	7	0.00333016	26	0.0006052	5.50258	0.000192029
GO:0002039	p53 binding	11	0.00523311	63	0.00146645	3.56857	0.000219751
GO:0004697	protein kinase C activity	9	0.00428164	44	0.00102418	4.18053	0.000236344
GO:0008143	poly(A) binding	5	0.00237869	13	0.0003026	7.86083	0.000258067
GO:0008327	methyl-CpG binding	5	0.00237869	13	0.0003026	7.86083	0.000258067
GO:0050700	CARD domain binding	4	0.00190295	8	0.000186215	10.2191	0.000341267
GO:0004672	protein kinase activity	42	0.019981	490	0.0114057	1.75184	0.000347726
GO:0008022	protein C-terminus binding	23	0.010942	214	0.00498126	2.19662	0.000360625
GO:0050681	androgen receptor binding	8	0.0038059	38	0.000884523	4.30277	0.000424735
GO:0003696	satellite DNA binding	3	0.00142721	4	9.31077e-05	15.3286	0.000450745
GO:0034046	poly(G) binding	3	0.00142721	4	9.31077e-05	15.3286	0.000450745
GO:0036033	mediator complex binding	3	0.00142721	4	9.31077e-05	15.3286	0.000450745
GO:0004003	ATP-dependent DNA helicase activity	9	0.00428164	48	0.00111729	3.83215	0.000468878
GO:0008026	ATP-dependent helicase activity	12	0.00570885	80	0.00186215	3.06572	0.000499206
GO:0048027	mRNA 5'-UTR binding	4	0.00190295	9	0.000209492	9.08362	0.000590442
GO:0003729	mRNA binding	15	0.00713606	117	0.0027234	2.62028	0.000599951
GO:0042809	vitamin D receptor binding	5	0.00237869	16	0.000372431	6.38692	0.000774353
GO:0048365	Rac GTPase binding	8	0.0038059	42	0.000977631	3.89298	0.000861653
GO:0008157	protein phosphatase 1 binding	4	0.00190295	10	0.000232769	8.17526	0.000945949
GO:0031491	nucleosome binding	4	0.00190295	10	0.000232769	8.17526	0.000945949
GO:0031625	ubiquitin protein ligase binding	22	0.0104662	217	0.00505109	2.07207	0.00104627
GO:0008574	plus-end-directed microtubule motor activity	5	0.00237869	17	0.000395708	6.01122	0.00105298
GO:0051019	mitogen-activated protein kinase binding	5	0.00237869	17	0.000395708	6.01122	0.00105298
GO:0017137	Rab GTPase binding	16	0.0076118	137	0.00318894	2.38694	0.00112003
GO:0019899	enzyme binding	30	0.0142721	337	0.00784432	1.81942	0.00126407
GO:0003725	double-stranded RNA binding	11	0.00523311	77	0.00179232	2.91974	0.0012764
GO:0005452	inorganic anion exchanger activity	7	0.00333016	35	0.000814692	4.08763	0.00133497
GO:0005158	insulin receptor binding	8	0.0038059	45	0.00104746	3.63345	0.00138184
GO:0004430	1-phosphatidylinositol 4-kinase activity	4	0.00190295	11	0.000256046	7.43206	0.00142901
GO:0051015	actin filament binding	20	0.00951475	195	0.004539	2.09622	0.00150014
GO:0008017	microtubule binding	30	0.0142721	344	0.00800726	1.7824	0.0017356
GO:0042826	histone deacetylase binding	12	0.00570885	92	0.00214148	2.66585	0.00175575
GO:0004402	histone acetyltransferase activity	9	0.00428164	58	0.00135006	3.17144	0.00192099
GO:0000405	bubble DNA binding	3	0.00142721	6	0.000139662	10.2191	0.00209217
GO:0004679	AMP-activated protein kinase activity	3	0.00142721	6	0.000139662	10.2191	0.00209217
GO:0043140	ATP-dependent 3'-5' DNA helicase activity	3	0.00142721	6	0.000139662	10.2191	0.00209217
GO:0001047	core promoter binding	9	0.00428164	59	0.00137334	3.11768	0.00216993
GO:0046872	metal ion binding	161	0.0765937	2641	0.0614744	1.24595	0.00232908
GO:0001156	TFIIIC-class transcription factor binding	2	0.000951475	2	4.65539e-05	20.4382	0.00239288
GO:0047322	[hydroxymethylglutaryl-CoA reductase (NADPH)] kinase activity	2	0.000951475	2	4.65539e-05	20.4382	0.00239288
GO:0050405	[acetyl-CoA carboxylase] kinase activity	2	0.000951475	2	4.65539e-05	20.4382	0.00239288
GO:0035064	methylated histone binding	9	0.00428164	60	0.00139662	3.06572	0.00244387
GO:0004004	ATP-dependent RNA helicase activity	6	0.00285442	29	0.000675031	4.22858	0.00244832
GO:0046965	retinoid X receptor binding	6	0.00285442	29	0.000675031	4.22858	0.00244832
GO:0005097	Rab GTPase activator activity	13	0.00618459	109	0.00253718	2.43758	0.00260754
GO:0008266	poly(U) RNA binding	4	0.00190295	13	0.0003026	6.28866	0.00286197
GO:0005100	Rho GTPase activator activity	6	0.00285442	30	0.000698308	4.08763	0.00293527
GO:0016887	ATPase activity	22	0.0104662	236	0.00549335	1.90525	0.00301943
GO:0008757	S-adenosylmethionine-dependent methyltransferase activity	3	0.00142721	7	0.000162938	8.75921	0.00352815
GO:0036310	annealing helicase activity	3	0.00142721	7	0.000162938	8.75921	0.00352815
GO:0042805	actinin binding	3	0.00142721	7	0.000162938	8.75921	0.00352815
GO:0019902	phosphatase binding	8	0.0038059	52	0.0012104	3.14433	0.00356654
GO:0033613	activating transcription factor binding	5	0.00237869	22	0.000512092	4.64504	0.00365451
GO:0003777	microtubule motor activity	19	0.00903901	196	0.00456228	1.98125	0.0036559
GO:0004385	guanylate kinase activity	4	0.00190295	14	0.000325877	5.83947	0.00385265
GO:0035197	siRNA binding	4	0.00190295	14	0.000325877	5.83947	0.00385265
GO:0070064	proline-rich region binding	5	0.00237869	23	0.000535369	4.44308	0.0044838
GO:0005198	structural molecule activity	30	0.0142721	371	0.00863574	1.65268	0.00523297
GO:0004815	aspartate-tRNA ligase activity	3	0.00142721	8	0.000186215	7.66431	0.00544028
GO:0035033	histone deacetylase regulator activity	3	0.00142721	8	0.000186215	7.66431	0.00544028
GO:0004707	MAP kinase activity	6	0.00285442	34	0.000791415	3.60673	0.00562862
GO:0008353	RNA polymerase II carboxy-terminal domain kinase activity	4	0.00190295	16	0.000372431	5.10954	0.00647778
GO:0043422	protein kinase B binding	4	0.00190295	16	0.000372431	5.10954	0.00647778
GO:0030506	ankyrin binding	5	0.00237869	25	0.000581923	4.08763	0.00652853
GO:0003746	translation elongation factor activity	7	0.00333016	46	0.00107074	3.11015	0.00666052
GO:0001030	RNA polymerase III type 1 promoter DNA binding	2	0.000951475	3	6.98308e-05	13.6254	0.00694468
GO:0001031	RNA polymerase III type 2 promoter DNA binding	2	0.000951475	3	6.98308e-05	13.6254	0.00694468
GO:0001032	RNA polymerase III type 3 promoter DNA binding	2	0.000951475	3	6.98308e-05	13.6254	0.00694468
GO:0003878	ATP citrate synthase activity	2	0.000951475	3	6.98308e-05	13.6254	0.00694468
GO:0004639	phosphoribosylaminoimidazolesuccinocarboxamide synthase activity	2	0.000951475	3	6.98308e-05	13.6254	0.00694468
GO:0035034	histone acetyltransferase regulator activity	2	0.000951475	3	6.98308e-05	13.6254	0.00694468
GO:0042392	sphingosine-1-phosphate phosphatase activity	2	0.000951475	3	6.98308e-05	13.6254	0.00694468
GO:0051011	microtubule minus-end binding	2	0.000951475	3	6.98308e-05	13.6254	0.00694468
GO:0003910	DNA ligase (ATP) activity	3	0.00142721	9	0.000209492	6.81272	0.0078652
GO:0017160	Ral GTPase binding	4	0.00190295	17	0.000395708	4.80898	0.00814695
GO:0042169	SH2 domain binding	6	0.00285442	37	0.000861246	3.3143	0.00859165
GO:0045502	dynein binding	5	0.00237869	27	0.000628477	3.78484	0.00914987
GO:0005178	integrin binding	14	0.00666032	141	0.00328205	2.02932	0.00943262
GO:0004221	ubiquitin thiolesterase activity	6	0.00285442	38	0.000884523	3.22708	0.0097892
GO:0031492	nucleosomal DNA binding	6	0.00285442	38	0.000884523	3.22708	0.0097892
GO:0004930	G-protein coupled receptor activity	8	0.0038059	777	0.0180862	0.210431	1.81797e-09
GO:0004252	serine-type endopeptidase activity	2	0.000951475	343	0.00798399	0.119173	5.53921e-06
GO:0004984	olfactory receptor activity	4	0.00190295	426	0.00991597	0.191908	5.59204e-06
GO:0005506	iron ion binding	2	0.000951475	296	0.00688997	0.138096	4.5069e-05
GO:0005509	calcium ion binding	41	0.0195052	1400	0.0325877	0.598546	0.000141292
GO:0030246	carbohydrate binding	4	0.00190295	334	0.00777449	0.244768	0.000232432
GO:0003824	catalytic activity	6	0.00285442	398	0.00926422	0.308113	0.000278089
GO:0008083	growth factor activity	2	0.000951475	225	0.00523731	0.181672	0.000973068
GO:0016491	oxidoreductase activity	5	0.00237869	330	0.00768139	0.309669	0.000986835
GO:0020037	heme binding	4	0.00190295	275	0.00640115	0.297282	0.00220769
GO:0005125	cytokine activity	2	0.000951475	199	0.00463211	0.205409	0.0028824
GO:0008201	heparin binding	2	0.000951475	183	0.00425968	0.223368	0.00554573
GO:0005215	transporter activity	6	0.00285442	313	0.00728568	0.391786	0.00524513
The most over- or under-represented cellular_component
GO:0005730	nucleolus	409	0.194577	2704	0.0629408	3.09142	1.52414e-98
GO:0005634	nucleus	816	0.388202	8778	0.204325	1.89992	7.18688e-88
GO:0005737	cytoplasm	653	0.310657	6527	0.151928	2.04475	2.467e-79
GO:0005654	nucleoplasm	144	0.0685062	1082	0.0251856	2.72005	9.10167e-28
GO:0005829	cytosol	281	0.133682	2984	0.0694583	1.92464	6.71428e-27
GO:0016020	membrane	242	0.115128	2986	0.0695049	1.65641	4.04196e-15
GO:0005925	focal adhesion	60	0.0285442	460	0.0107074	2.66585	6.01719e-12
GO:0015629	actin cytoskeleton	46	0.0218839	323	0.00751845	2.9107	9.16374e-11
GO:0043234	protein complex	56	0.0266413	452	0.0105212	2.53216	2.20734e-10
GO:0043231	intracellular membrane-bounded organelle	64	0.0304472	583	0.0135704	2.24364	1.78878e-09
GO:0005856	cytoskeleton	62	0.0294957	575	0.0133842	2.20377	6.33404e-09
GO:0005694	chromosome	21	0.00999049	108	0.00251391	3.97409	5.58236e-08
GO:0030529	ribonucleoprotein complex	24	0.0114177	138	0.00321222	3.55446	6.17459e-08
GO:0005813	centrosome	53	0.0252141	504	0.0117316	2.14925	1.73449e-07
GO:0000790	nuclear chromatin	28	0.0133206	189	0.00439934	3.02787	1.77394e-07
GO:0016607	nuclear speck	20	0.00951475	106	0.00246735	3.85626	1.9261e-07
GO:0000785	chromatin	20	0.00951475	114	0.00265357	3.58564	6.54906e-07
GO:0005923	tight junction	25	0.0118934	174	0.00405019	2.93652	1.40983e-06
GO:0016363	nuclear matrix	18	0.00856327	100	0.00232769	3.67887	1.59015e-06
GO:0005720	nuclear heterochromatin	11	0.00523311	40	0.000931077	5.62049	2.32245e-06
GO:0016605	PML body	16	0.0076118	85	0.00197854	3.84718	3.24291e-06
GO:0005874	microtubule	42	0.019981	408	0.00949699	2.10393	5.36582e-06
GO:0000792	heterochromatin	10	0.00475737	37	0.000861246	5.52383	7.95045e-06
GO:0005912	adherens junction	8	0.0038059	24	0.000558646	6.81272	1.17766e-05
GO:0015030	Cajal body	9	0.00428164	31	0.000721585	5.93366	1.19421e-05
GO:0000775	chromosome, centromeric region	13	0.00618459	66	0.00153628	4.0257	1.59482e-05
GO:0030659	cytoplasmic vesicle membrane	11	0.00523311	49	0.00114057	4.58816	1.94997e-05
GO:0071013	catalytic step 2 spliceosome	14	0.00666032	80	0.00186215	3.57668	3.11075e-05
GO:0015630	microtubule cytoskeleton	23	0.010942	185	0.00430623	2.54096	4.00801e-05
GO:0035145	exon-exon junction complex	7	0.00333016	22	0.000512092	6.50305	5.9148e-05
GO:0001725	stress fiber	12	0.00570885	65	0.001513	3.7732	6.56196e-05
GO:0005643	nuclear pore	16	0.0076118	108	0.00251391	3.02787	7.2667e-05
GO:0070937	CRD-mediated mRNA stability complex	4	0.00190295	6	0.000139662	13.6254	7.91692e-05
GO:0030057	desmosome	8	0.0038059	31	0.000721585	5.27436	9.29637e-05
GO:0005819	spindle	14	0.00666032	89	0.00207165	3.21499	0.000104388
GO:0043034	costamere	9	0.00428164	40	0.000931077	4.59858	0.000108748
GO:0031965	nuclear membrane	24	0.0114177	212	0.00493471	2.31375	0.000123427
GO:0005637	nuclear inner membrane	7	0.00333016	25	0.000581923	5.72268	0.000146498
GO:0005681	spliceosomal complex	16	0.0076118	115	0.00267685	2.84357	0.000155068
GO:0000922	spindle pole	15	0.00713606	104	0.0024208	2.94781	0.00016405
GO:0005911	cell-cell junction	24	0.0114177	218	0.00507437	2.25007	0.000189402
GO:0035327	transcriptionally active chromatin	6	0.00285442	19	0.000442262	6.45415	0.000212825
GO:0032154	cleavage furrow	7	0.00333016	27	0.000628477	5.29878	0.000248331
GO:0030496	midbody	15	0.00713606	108	0.00251391	2.83863	0.000250813
GO:0005913	cell-cell adherens junction	10	0.00475737	54	0.00125695	3.78484	0.000255813
GO:0072686	mitotic spindle	8	0.0038059	36	0.000837969	4.54181	0.000286716
GO:0045111	intermediate filament cytoskeleton	14	0.00666032	98	0.00228114	2.91974	0.000296214
GO:0000776	kinetochore	16	0.0076118	122	0.00283978	2.68041	0.000309225
GO:0031519	PcG protein complex	7	0.00333016	28	0.000651754	5.10954	0.000317187
GO:0070062	extracellular vesicular exosome	173	0.0823026	2738	0.0637322	1.29138	0.000329566
GO:0017053	transcriptional repressor complex	12	0.00570885	77	0.00179232	3.18517	0.00034848
GO:0005768	endosome	32	0.0152236	341	0.00793743	1.91795	0.000362342
GO:0034666	integrin alpha2-beta1 complex	3	0.00142721	4	9.31077e-05	15.3286	0.000450745
GO:0035363	histone locus body	3	0.00142721	4	9.31077e-05	15.3286	0.000450745
GO:0005815	microtubule organizing center	13	0.00618459	91	0.0021182	2.91974	0.00048084
GO:0005868	cytoplasmic dynein complex	7	0.00333016	30	0.000698308	4.7689	0.000500521
GO:0005794	Golgi apparatus	87	0.0413892	1242	0.0289099	1.43166	0.000553339
GO:0000777	condensed chromosome kinetochore	4	0.00190295	9	0.000209492	9.08362	0.000590442
GO:0031931	TORC1 complex	4	0.00190295	9	0.000209492	9.08362	0.000590442
GO:0005719	nuclear euchromatin	6	0.00285442	23	0.000535369	5.33169	0.000669035
GO:0005664	nuclear origin of replication recognition complex	5	0.00237869	16	0.000372431	6.38692	0.000774353
GO:0030136	clathrin-coated vesicle	8	0.0038059	42	0.000977631	3.89298	0.000861653
GO:0005667	transcription factor complex	34	0.0161751	392	0.00912455	1.7727	0.000985215
GO:0008023	transcription elongation factor complex	6	0.00285442	25	0.000581923	4.90516	0.00107918
GO:0030688	preribosome, small subunit precursor	3	0.00142721	5	0.000116385	12.2629	0.00108567
GO:0045171	intercellular bridge	8	0.0038059	45	0.00104746	3.63345	0.00138184
GO:0048471	perinuclear region of cytoplasm	46	0.0218839	590	0.0137334	1.59348	0.00140192
GO:0042405	nuclear inclusion body	4	0.00190295	11	0.000256046	7.43206	0.00142901
GO:0071339	MLL1 complex	6	0.00285442	27	0.000628477	4.54181	0.00165876
GO:0019898	extrinsic component of membrane	10	0.00475737	68	0.00158283	3.00561	0.00167235
GO:0035102	PRC1 complex	4	0.00190295	12	0.000279323	6.81272	0.00206077
GO:0030054	cell junction	40	0.0190295	505	0.0117548	1.61886	0.0020836
GO:0000127	transcription factor TFIIIC complex	3	0.00142721	6	0.000139662	10.2191	0.00209217
GO:0000974	Prp19 complex	3	0.00142721	6	0.000139662	10.2191	0.00209217
GO:0016282	eukaryotic 43S preinitiation complex	5	0.00237869	20	0.000465539	5.10954	0.00233403
GO:0031933	telomeric heterochromatin	2	0.000951475	2	4.65539e-05	20.4382	0.00239288
GO:0036449	microtubule minus-end	2	0.000951475	2	4.65539e-05	20.4382	0.00239288
GO:0070603	SWI/SNF superfamily-type complex	2	0.000951475	2	4.65539e-05	20.4382	0.00239288
GO:0042995	cell projection	18	0.00856327	176	0.00409674	2.09027	0.00259299
GO:0000346	transcription export complex	4	0.00190295	13	0.0003026	6.28866	0.00286197
GO:0005677	chromatin silencing complex	3	0.00142721	7	0.000162938	8.75921	0.00352815
GO:0005826	actomyosin contractile ring	3	0.00142721	7	0.000162938	8.75921	0.00352815
GO:0008024	positive transcription elongation factor complex b	3	0.00142721	7	0.000162938	8.75921	0.00352815
GO:0016593	Cdc73/Paf1 complex	3	0.00142721	7	0.000162938	8.75921	0.00352815
GO:0072669	tRNA-splicing ligase complex	3	0.00142721	7	0.000162938	8.75921	0.00352815
GO:0016514	SWI/SNF complex	5	0.00237869	22	0.000512092	4.64504	0.00365451
GO:0030877	beta-catenin destruction complex	4	0.00190295	15	0.000349154	5.45017	0.00505193
GO:0005871	kinesin complex	15	0.00713606	146	0.00339843	2.09981	0.00541465
GO:0035371	microtubule plus-end	5	0.00237869	24	0.000558646	4.25795	0.00543866
GO:0005638	lamin filament	3	0.00142721	8	0.000186215	7.66431	0.00544028
GO:0005732	small nucleolar ribonucleoprotein complex	3	0.00142721	8	0.000186215	7.66431	0.00544028
GO:0005721	pericentric heterochromatin	4	0.00190295	16	0.000372431	5.10954	0.00647778
GO:0005899	insulin receptor complex	2	0.000951475	3	6.98308e-05	13.6254	0.00694468
GO:0019908	nuclear cyclin-dependent protein kinase holoenzyme complex	2	0.000951475	3	6.98308e-05	13.6254	0.00694468
GO:0033186	CAF-1 complex	2	0.000951475	3	6.98308e-05	13.6254	0.00694468
GO:0000118	histone deacetylase complex	6	0.00285442	36	0.000837969	3.40636	0.00750276
GO:0000794	condensed nuclear chromosome	6	0.00285442	36	0.000837969	3.40636	0.00750276
GO:0005811	lipid particle	9	0.00428164	71	0.00165266	2.59075	0.00763379
GO:0000242	pericentriolar material	5	0.00237869	26	0.0006052	3.93041	0.00776263
GO:0035097	histone methyltransferase complex	5	0.00237869	26	0.0006052	3.93041	0.00776263
GO:0031616	spindle pole centrosome	4	0.00190295	17	0.000395708	4.80898	0.00814695
GO:0051233	spindle midzone	4	0.00190295	17	0.000395708	4.80898	0.00814695
GO:0010494	cytoplasmic stress granule	7	0.00333016	48	0.00111729	2.98056	0.00842069
GO:0016021	integral component of membrane	138	0.0656518	6159	0.143363	0.457942	2.35861e-30
GO:0005576	extracellular region	21	0.00999049	1796	0.0418054	0.238976	9.97019e-19
GO:0005615	extracellular space	28	0.0133206	1379	0.0320989	0.414988	1.65393e-08
GO:0005622	intracellular	40	0.0190295	1401	0.032611	0.58353	7.73261e-05
GO:0005578	proteinaceous extracellular matrix	3	0.00142721	311	0.00723912	0.197153	0.000132432
GO:0005743	mitochondrial inner membrane	8	0.0038059	466	0.010847	0.35087	0.000249125
GO:0005887	integral component of plasma membrane	36	0.0171265	1183	0.0275366	0.621956	0.000967315
GO:0031012	extracellular matrix	2	0.000951475	223	0.00519075	0.183302	0.00105878
GO:0005788	endoplasmic reticulum lumen	1	0.000475737	154	0.00358465	0.132715	0.00389629

## Sheet: Table S5
Table S5. KEGG pathway analysis of phosphorylated proteins in the MHCC97-H cell line with the hypergeometric test (p-value < 0.01).
KEGG ID	Definition	Phosphoproteome		Proteome		E-ratio	p-value
		Num.	Per.	Num.	Per.
The most over- or under-represented KEGG Pathways
path:hsa03040	Spliceosome	23	0.0576441	127	0.0199686	2.88674	3.05797e-06
path:hsa04910	Insulin signaling pathway	22	0.0551378	139	0.0218553	2.52285	4.57548e-05
path:hsa04110	Cell cycle	20	0.0501253	127	0.0199686	2.51021	0.000108707
path:hsa04150	mTOR signaling pathway	13	0.0325815	67	0.0105346	3.09281	0.000216776
path:hsa04510	Focal adhesion	26	0.0651629	204	0.0320755	2.03155	0.000387986
path:hsa04722	Neurotrophin signaling pathway	18	0.0451128	119	0.0187107	2.41107	0.000397968
path:hsa00310	Lysine degradation	10	0.0250627	50	0.00786164	3.18797	0.000897958
path:hsa04012	ErbB signaling pathway	14	0.0350877	89	0.0139937	2.50739	0.00116976
path:hsa05211	Renal cell carcinoma	12	0.0300752	70	0.0110063	2.73255	0.00120688
path:hsa05100	Bacterial invasion of epithelial cells	12	0.0300752	70	0.0110063	2.73255	0.00120688
path:hsa04810	Regulation of actin cytoskeleton	25	0.0626566	215	0.033805	1.85347	0.00190683
path:hsa05132	Salmonella infection	13	0.0325815	85	0.0133648	2.43786	0.00225448
path:hsa03013	RNA transport	19	0.047619	155	0.0243711	1.95392	0.0036146
path:hsa04530	Tight junction	17	0.0426065	134	0.0210692	2.02222	0.00405643
path:hsa05131	Shigellosis	10	0.0250627	62	0.00974843	2.57094	0.0047962
path:hsa04520	Adherens junction	11	0.0275689	75	0.0117925	2.33784	0.00663952
path:hsa05220	Chronic myeloid leukemia	11	0.0275689	76	0.0119497	2.30708	0.00733956
path:hsa05210	Colorectal cancer	10	0.0250627	66	0.0103774	2.41513	0.00752952
path:hsa03008	Ribosome biogenesis in eukaryotes	11	0.0275689	77	0.0121069	2.27712	0.00809589
path:hsa04666	Fc gamma R-mediated phagocytosis	13	0.0325815	99	0.015566	2.09311	0.00851983
path:hsa05168	Herpes simplex infection	21	0.0526316	193	0.0303459	1.73439	0.00914121
path:hsa04740	Olfactory transduction	3	0.0075188	397	0.0624214	0.120452	1.19856e-08
path:hsa04080	Neuroactive ligand-receptor interaction	3	0.0075188	326	0.0512579	0.146686	8.67373e-07
path:hsa01100	Metabolic pathways	46	0.115288	1186	0.186478	0.61824	4.90176e-05
path:hsa04060	Cytokine-cytokine receptor interaction	5	0.0125313	278	0.0437107	0.286688	0.000291295
path:hsa04142	Lysosome	1	0.00250627	123	0.0193396	0.129592	0.00300353
